# Supplementary material
Source: publisher figshare collection journal article supplement (https://gsajournals.figshare.com/ndownloader/files/29148150)
Supplement: Supplementary file 1 [file 29148150]

## Sheet: LibraryInfo
Bioproject	Biosample Accession	Individual	SRR	Study	filename	Sequencing Chemistry	Type	Sequencing Institution	Data Type	Total MB	Number of Read Pairs	Linker Sequence	% Linker	Barcode Sequence F	Barcode Sequence R
PRJNA576068	SAMN12924379	Hc1	SRR10237149	SRP224535	Hc1_lib1_run1_PB_WGS	Sequel Sequencing Kit 2.1 v2	WGS	UC Davis	PacBio	2609.41	388824
			SRR10237148	SRP224535	Hc1_lib1_run2_PB_WGS	Sequel Sequencing Kit 2.1 v2	WGS	UC Davis	PacBio	1277.87	190413
			SRR10237137	SRP224535	Hc1_lib2_run1_PB_WGS	Sequel Sequencing Kit 3.0	WGS	UC Davis	PacBio	23530	9121456
			SRR10237134	SRP224535	Hc1_lib3_run1_ILL_10XChromium	HiSeq 4000 150PE	10XChromium	Fulgent	10X Chromium	22287.8	74292738
			SRR10237133	SRP224535	Hc1_lib4_run1_ILL_WGS	HiSeq 4000 150PE	WGS	UC Davis	NEB Next Ultra II WGS	5973.26	19910859
			SRR10237132	SRP224535	Hc1_lib4_run2_ILL_WGS	HiSeq X	WGS	UC Davis	NEB Next Ultra II WGS	11092.7	36975533
			SRR10237131	SRP224535	Hc1_lib5_run1_ILL_WGS	HiSeq 4000 150PE	WGS	UC Davis	NEB Next Ultra II WGS	5832.72	19442410
			SRR10237130	SRP224535	Hc1_lib5_run2_ILL_WGS	HiSeq X	WGS	UC Davis	NEB Next Ultra II WGS	9808.15	32693835
			SRR10237129	SRP224535	Hc1_lib6_run1_ILL_WGS	HiSeq 4000 150PE	WGS	UC Davis	NEB Next Ultra II FS	3356.48	11188263
			SRR10237128	SRP224535	Hc1_lib7_run1_ILL_ChicagoDpnII	HiSeq 4000 150PE	ChicagoDpnII	UC Davis	Chicago - DpnII	10690.7	35635682	GATCGATC	47
			SRR10237147	SRP224535	Hc1_lib8_run1_ILL_ChicagoMluCI	HiSeq 4000 150PE	ChicagoMluCI	UC Davis	Chicago - MluCI	1702.79	5675963	AATTAATT	15
			SRR10237146	SRP224535	Hc1_lib8_run2_ILL_ChicagoMluCI	HiSeq X	ChicagoMluCI	UC Davis	Chicago - MluCI	19243.3	64144242	AATTAATT	15
			SRR10237145	SRP224535	Hc1_lib9_run1_ILL_HiCDpnII	HiSeq 4000 150PE	HiCDpnII	UC Davis	HiC - DpnII	11587.6	38625297	GATCGATC	36
			SRR13784183	SRP224535	Hc1_lib9_run2_ILL_HiCDpnII	NovaSeq S4	HiCDpnII	MedGenome Inc.	HiC - DpnII	38371.8	127906153	GATCGATC	36
			SRR10237144	SRP224535	Hc1_lib10_run1_ILL_HiCDpnII	HiSeq 4000 150PE	HiCDpnII	UC Davis	HiC - DpnII	414.38	1381270	GATCGATC	18.15
			SRR13784182	SRP224535	Hc1_lib10_run2_ILL_HiCDpnII	NovaSeq S4	HiCDpnII	MedGenome Inc.	HiC - DpnII	67637.7	225459097	GATCGATC	18.15
			SRR10237139	SRP224535	Hc1_lib15_run1_ILL_HiCMluCI	HiSeq X	HiCMluCI	UC Davis	HiC - MluCI	7028.17	23427219	AATTAATT	52.53
			SRR13784181	SRP224535	Hc1_lib15_run2_ILL_HiCMluCI	NovaSeq S4	HiCMluCI	MedGenome Inc.	HiC - MluCI	31103.5	103678278	AATTAATT	52.53
			SRR10237138	SRP224535	Hc1_lib16_run1_ILL_HiCMluCI	HiSeq X	HiCMluCI	UC Davis	HiC - MluCI	4293.38	14311277	AATTAATT	39
			SRR13784180	SRP224535	Hc1_lib16_run2_ILL_HiCMluCI	NovaSeq S4	HiCMluCI	MedGenome Inc.	HiC - MluCI	24481.5	81604918	AATTAATT	39
			SRR10237136	SRP224535	Hc1_lib17_run1_ILL_RNAseq	HiSeq 4000 150PE	RNAseq	UC Davis	TruSeq RNA Library Prep Kit v2 (stranded)	28798.9	95996307
			SRR10403581	SRP224535	Hc1_lib18_run1_PB_Iso-Seq	Sequel II Binding kit v2.1, Sequel II Sequencing Kit 2.0	Iso-Seq	UC Davis	Iso-Seq Express Template Preparation for Sequel and Sequel II Systems	7400	2810197			TCACGTGCTCACTGTGGCAATGAAGTCGCAGGGTTG	TCACGTGCTCACTGTGAAGCAGTGGTATCAACGCAGAGT
			SRR10403849	SRP224535	Hc1_lib18_run1_PB_Iso-Seq_trim_flnc	Sequel II Binding kit v2.1, Sequel II Sequencing Kit 2.0	Iso-Seq	UC Davis	Iso-Seq Express Template Preparation for Sequel and Sequel II Systems	6000	2462652			TCACGTGCTCACTGTGGCAATGAAGTCGCAGGGTTG	TCACGTGCTCACTGTGAAGCAGTGGTATCAACGCAGAGT
	SAMN12924380	Hc2	SRR10237135	SRP224535	Hc2_lib1_run1_ILL_WGS	HiSeq 2500 100PE	WGS	U. of Utah	Illumina TruSeq Nano DNA	12807.4	64036741
	SAMN16124402	Hc3	SRR12632403	SRP224535	Hc3_lib1_run1_ILL_HiCDpnII	HiSeq X 150PE	HiCDpnII	MedGenome Inc.	HiC - DpnII	13267.7	44225720	GATCGATC	19.1
			SRR13784179	SRP224535	Hc3_lib1_run2_ILL_HiCDpnII	NovaSeq S4	HiCDpnII	MedGenome Inc.	HiC - DpnII	56893.4	189644694	GATCGATC	19.1

## Sheet: IsoSeqTranscripts
# These are exons that overlap, at least 50% in length, with at least one Iso-Seq read.
# column 1 is scaffold. column 2 is overlap start, column 3 is overlap stop, column 4 is transcript
M	106	373	Hcv1.av93.M.g1.i1
M	605	942	Hcv1.av93.M.g1.i1
c1	5610	5719	Hcv1.av93.c1.g2.i1
c1	5611	5719	Hcv1.av93.c1.g2.i2
c1	6249	6447	Hcv1.av93.c1.g2.i2
c1	6330	6429	Hcv1.av93.c1.g2.i1
c1	11018	11188	Hcv1.av93.c1.g4.i1
c1	11079	11188	Hcv1.av93.c1.g5.i1
c1	11288	11453	Hcv1.av93.c1.g4.i1
c1	11288	11453	Hcv1.av93.c1.g5.i1
c1	11559	12163	Hcv1.av93.c1.g5.i1
c1	12979	13637	Hcv1.av93.c1.g4.i2
c1	13062	13457	Hcv1.av93.c1.g5.i1
c1	14423	14524	Hcv1.av93.c1.g4.i2
c1	14624	14789	Hcv1.av93.c1.g4.i2
c1	14895	16073	Hcv1.av93.c1.g4.i1
c1	14895	16073	Hcv1.av93.c1.g4.i2
c1	16202	16978	Hcv1.av93.c1.g6.i3
c1	16202	16978	Hcv1.av93.c1.g6.i4
c1	16202	16978	Hcv1.av93.c1.g6.i2
c1	16202	16978	Hcv1.av93.c1.g6.i1
c1	17764	18630	Hcv1.av93.c1.g6.i2
c1	17764	18630	Hcv1.av93.c1.g6.i1
c1	17764	18630	Hcv1.av93.c1.g6.i3
c1	17764	18260	Hcv1.av93.c1.g6.i4
c1	18525	18630	Hcv1.av93.c1.g6.i4
c1	18734	19388	Hcv1.av93.c1.g6.i1
c1	18734	19290	Hcv1.av93.c1.g6.i2
c1	18734	19439	Hcv1.av93.c1.g6.i3
c1	18734	19439	Hcv1.av93.c1.g6.i4
c1	20293	20557	Hcv1.av93.c1.g6.i1
c1	20293	20557	Hcv1.av93.c1.g6.i2
c1	20293	20557	Hcv1.av93.c1.g6.i3
c1	20293	20557	Hcv1.av93.c1.g6.i4
c1	22971	23116	Hcv1.av93.c1.g7.i1
c1	23319	23440	Hcv1.av93.c1.g7.i1
c1	23572	23715	Hcv1.av93.c1.g7.i1
c1	24916	25091	Hcv1.av93.c1.g7.i1
c1	25208	25397	Hcv1.av93.c1.g7.i1
c1	35920	36126	Hcv1.av93.c1.g7.i1
c1	36403	36786	Hcv1.av93.c1.g7.i1
c1	36980	37087	Hcv1.av93.c1.g7.i1
c1	44302	44434	Hcv1.av93.c1.g7.i1
c1	44724	45036	Hcv1.av93.c1.g7.i1
c1	46330	46480	Hcv1.av93.c1.g7.i1
c1	50971	51081	Hcv1.av93.c1.g7.i1
c1	51154	51483	Hcv1.av93.c1.g7.i1
c1	51586	51786	Hcv1.av93.c1.g7.i1
c1	51865	52074	Hcv1.av93.c1.g7.i1
c1	53555	53769	Hcv1.av93.c1.g7.i1
c1	60248	60726	Hcv1.av93.c1.g7.i1
c1	60809	61006	Hcv1.av93.c1.g7.i1
c1	61141	61358	Hcv1.av93.c1.g7.i1
c1	61427	61658	Hcv1.av93.c1.g8.i1
c1	61834	61904	Hcv1.av93.c1.g8.i1
c1	61925	63328	Hcv1.av93.c1.g9.i1
c1	63574	63636	Hcv1.av93.c1.g9.i1
c1	63775	63923	Hcv1.av93.c1.g9.i1
c1	65649	65838	Hcv1.av93.c1.g9.i1
c1	65940	66257	Hcv1.av93.c1.g9.i1
c1	70963	71279	Hcv1.av93.c1.g12.i2
c1	70963	71279	Hcv1.av93.c1.g12.i4
c1	70963	72854	Hcv1.av93.c1.g12.i1
c1	70963	72854	Hcv1.av93.c1.g12.i3
c1	71560	72854	Hcv1.av93.c1.g12.i2
c1	71560	72854	Hcv1.av93.c1.g12.i4
c1	76391	76555	Hcv1.av93.c1.g12.i3
c1	76391	76555	Hcv1.av93.c1.g12.i2
c1	76391	76555	Hcv1.av93.c1.g12.i4
c1	76391	76555	Hcv1.av93.c1.g12.i1
c1	76640	76956	Hcv1.av93.c1.g12.i3
c1	76640	76956	Hcv1.av93.c1.g12.i1
c1	76640	76956	Hcv1.av93.c1.g12.i2
c1	76640	76956	Hcv1.av93.c1.g12.i4
c1	77038	77102	Hcv1.av93.c1.g12.i3
c1	77038	77102	Hcv1.av93.c1.g12.i4
c1	77038	77102	Hcv1.av93.c1.g12.i2
c1	77038	77102	Hcv1.av93.c1.g12.i1
c1	77167	77493	Hcv1.av93.c1.g12.i2
c1	77167	77493	Hcv1.av93.c1.g12.i3
c1	77167	77493	Hcv1.av93.c1.g12.i4
c1	77167	77493	Hcv1.av93.c1.g12.i1
c1	77631	77796	Hcv1.av93.c1.g12.i2
c1	77631	77796	Hcv1.av93.c1.g12.i1
c1	77631	77796	Hcv1.av93.c1.g12.i3
c1	77631	77796	Hcv1.av93.c1.g12.i4
c1	77896	78309	Hcv1.av93.c1.g12.i2
c1	77896	78309	Hcv1.av93.c1.g12.i1
c1	77896	78062	Hcv1.av93.c1.g12.i3
c1	77896	78062	Hcv1.av93.c1.g12.i4
c1	78223	78309	Hcv1.av93.c1.g12.i4
c1	78223	78309	Hcv1.av93.c1.g12.i3
c1	80793	81217	Hcv1.av93.c1.g14.i1
c1	80800	81217	Hcv1.av93.c1.g14.i2
c1	80871	81217	Hcv1.av93.c1.g14.i3
c1	81315	81399	Hcv1.av93.c1.g14.i1
c1	81315	81399	Hcv1.av93.c1.g14.i3
c1	81315	81399	Hcv1.av93.c1.g14.i2
c1	83788	83866	Hcv1.av93.c1.g14.i1
c1	83788	83866	Hcv1.av93.c1.g14.i3
c1	83974	84148	Hcv1.av93.c1.g14.i3
c1	83974	84148	Hcv1.av93.c1.g14.i1
c1	83974	84148	Hcv1.av93.c1.g14.i2
c1	84259	84434	Hcv1.av93.c1.g14.i2
c1	84259	84434	Hcv1.av93.c1.g14.i3
c1	84259	84434	Hcv1.av93.c1.g14.i1
c1	84546	84772	Hcv1.av93.c1.g14.i2
c1	84546	84772	Hcv1.av93.c1.g14.i1
c1	84546	84772	Hcv1.av93.c1.g14.i3
c1	84891	84990	Hcv1.av93.c1.g14.i2
c1	84891	84990	Hcv1.av93.c1.g14.i1
c1	84891	84990	Hcv1.av93.c1.g14.i3
c1	85080	85181	Hcv1.av93.c1.g14.i1
c1	85080	85181	Hcv1.av93.c1.g14.i2
c1	85080	85181	Hcv1.av93.c1.g14.i3
c1	85306	85577	Hcv1.av93.c1.g14.i1
c1	85306	85577	Hcv1.av93.c1.g14.i2
c1	85306	85577	Hcv1.av93.c1.g14.i3
c1	85385	85577	Hcv1.av93.c1.g14.i6
c1	85385	85577	Hcv1.av93.c1.g14.i5
c1	85385	87302	Hcv1.av93.c1.g14.i4
c1	85688	89506	Hcv1.av93.c1.g14.i6
c1	85688	86072	Hcv1.av93.c1.g14.i2
c1	85688	87356	Hcv1.av93.c1.g14.i3
c1	85688	86072	Hcv1.av93.c1.g14.i1
c1	85688	88431	Hcv1.av93.c1.g14.i5
c1	86173	86761	Hcv1.av93.c1.g14.i2
c1	86173	86761	Hcv1.av93.c1.g14.i1
c1	87206	89499	Hcv1.av93.c1.g14.i7
c1	87456	89506	Hcv1.av93.c1.g14.i8
c1	87577	89506	Hcv1.av93.c1.g14.i9
c1	93067	94120	Hcv1.av93.c1.g15.i1
c1	94689	96207	Hcv1.av93.c1.g16.i1
c1	96171	96207	Hcv1.av93.c1.g11.i1
c1	103147	103275	Hcv1.av93.c1.g17.i2
c1	103147	103275	Hcv1.av93.c1.g17.i1
c1	103453	103535	Hcv1.av93.c1.g17.i2
c1	103453	103535	Hcv1.av93.c1.g17.i1
c1	139714	140145	Hcv1.av93.c1.g18.i1;SII=y
c1	147245	148833	Hcv1.av93.c1.g18.i1;SII=y
c1	161275	161869	Hcv1.av93.c1.g19.i1
c1	172707	172925	Hcv1.av93.c1.g17.i1
c1	172707	172925	Hcv1.av93.c1.g17.i2
c1	172846	172925	Hcv1.av93.c1.g20.i1;SII=y
c1	174203	174341	Hcv1.av93.c1.g20.i1;SII=y
c1	174203	174341	Hcv1.av93.c1.g17.i2
c1	174446	174606	Hcv1.av93.c1.g17.i2
c1	174446	174606	Hcv1.av93.c1.g20.i1;SII=y
c1	174764	175769	Hcv1.av93.c1.g17.i2
c1	174764	175769	Hcv1.av93.c1.g20.i1;SII=y
c1	175870	175943	Hcv1.av93.c1.g17.i2
c1	175870	175943	Hcv1.av93.c1.g20.i1;SII=y
c1	176527	176744	Hcv1.av93.c1.g17.i2
c1	176527	176743	Hcv1.av93.c1.g20.i1;SII=y
c1	176858	177538	Hcv1.av93.c1.g21.i1
c1	186029	186885	Hcv1.av93.c1.g22.i1
c1	188995	189087	Hcv1.av93.c1.g3.i1
c1	190772	190885	Hcv1.av93.c1.g23.i1;SII=y
c1	190982	191129	Hcv1.av93.c1.g23.i1;SII=y
c1	191224	191443	Hcv1.av93.c1.g23.i1;SII=y
c1	191601	191782	Hcv1.av93.c1.g23.i1;SII=y
c1	191874	192026	Hcv1.av93.c1.g23.i1;SII=y
c1	193392	193530	Hcv1.av93.c1.g17.i1
c1	193626	193786	Hcv1.av93.c1.g17.i1
c1	193947	194955	Hcv1.av93.c1.g17.i1
c1	195056	195129	Hcv1.av93.c1.g17.i1
c1	195623	195839	Hcv1.av93.c1.g17.i1
c1	206379	206521	Hcv1.av93.c1.g23.i1;SII=y
c1	206717	206870	Hcv1.av93.c1.g23.i1;SII=y
c1	206952	207130	Hcv1.av93.c1.g23.i1;SII=y
c1	207209	207304	Hcv1.av93.c1.g23.i1;SII=y
c1	207397	207542	Hcv1.av93.c1.g23.i1;SII=y
c1	207588	208027	Hcv1.av93.c1.g24.i1
c1	210501	211481	Hcv1.av93.c1.g25.i1;SII=y
c1	211551	212710	Hcv1.av93.c1.g25.i1;SII=y
c1	217008	217145	Hcv1.av93.c1.g24.i1
c1	217290	217560	Hcv1.av93.c1.g24.i1
c1	217617	217831	Hcv1.av93.c1.g24.i1
c1	217932	218048	Hcv1.av93.c1.g24.i1
c1	218152	218239	Hcv1.av93.c1.g24.i1
c1	218296	218392	Hcv1.av93.c1.g24.i1
c1	219899	222433	Hcv1.av93.c1.g26.i1
c1	224301	224990	Hcv1.av93.c1.g26.i1
c1	225980	226103	Hcv1.av93.c1.g27.i1
c1	226158	226309	Hcv1.av93.c1.g27.i1
c1	226387	226587	Hcv1.av93.c1.g27.i1
c1	226670	226781	Hcv1.av93.c1.g27.i1
c1	226957	227098	Hcv1.av93.c1.g27.i1
c1	227865	228886	Hcv1.av93.c1.g27.i1
c1	228884	229045	Hcv1.av93.c1.g28.i1
c1	228887	229045	Hcv1.av93.c1.g28.i2
c1	229139	229750	Hcv1.av93.c1.g28.i1
c1	229139	229777	Hcv1.av93.c1.g28.i2
c1	230331	230930	Hcv1.av93.c1.g28.i1
c1	230331	230429	Hcv1.av93.c1.g28.i2
c1	230740	230930	Hcv1.av93.c1.g28.i2
c1	231145	232277	Hcv1.av93.c1.g28.i1
c1	231145	231627	Hcv1.av93.c1.g28.i2
c1	232501	235456	Hcv1.av93.c1.g29.i1
c1	233434	235254	Hcv1.av93.c1.g30.i2
c1	235523	237598	Hcv1.av93.c1.g30.i1
c1	238315	240901	Hcv1.av93.c1.g31.i1
c1	240957	241581	Hcv1.av93.c1.g32.i1
c1	244535	245697	Hcv1.av93.c1.g33.i1
c1	246376	249358	Hcv1.av93.c1.g34.i1
c1	250003	252683	Hcv1.av93.c1.g35.i1
c1	252196	252698	Hcv1.av93.c1.g36.i1
c1	253308	255841	Hcv1.av93.c1.g37.i1
c1	256051	256172	Hcv1.av93.c1.g37.i1
c1	256295	256790	Hcv1.av93.c1.g37.i1
c1	256841	256946	Hcv1.av93.c1.g38.i1
c1	257253	257356	Hcv1.av93.c1.g38.i1
c1	257680	257794	Hcv1.av93.c1.g38.i1
c1	257944	258538	Hcv1.av93.c1.g38.i1
c1	259961	260484	Hcv1.av93.c1.g39.i2
c1	259961	260484	Hcv1.av93.c1.g39.i3
c1	259961	260484	Hcv1.av93.c1.g39.i4
c1	259961	260484	Hcv1.av93.c1.g39.i1
c1	260586	260910	Hcv1.av93.c1.g39.i4
c1	260586	260910	Hcv1.av93.c1.g39.i1
c1	260586	260910	Hcv1.av93.c1.g39.i3
c1	260586	260910	Hcv1.av93.c1.g39.i2
c1	261061	261728	Hcv1.av93.c1.g39.i4
c1	261061	261728	Hcv1.av93.c1.g39.i2
c1	261061	261728	Hcv1.av93.c1.g39.i3
c1	261061	261728	Hcv1.av93.c1.g39.i1
c1	261849	262056	Hcv1.av93.c1.g39.i3
c1	261849	262056	Hcv1.av93.c1.g39.i2
c1	261849	262056	Hcv1.av93.c1.g39.i1
c1	261849	262056	Hcv1.av93.c1.g39.i4
c1	264264	264326	Hcv1.av93.c1.g39.i3
c1	264264	264326	Hcv1.av93.c1.g39.i1
c1	272881	275700	Hcv1.av93.c1.g40.i1;SII=y
c1	273710	273949	Hcv1.av93.c1.g41.i1
c1	278641	278703	Hcv1.av93.c1.g39.i2
c1	278641	278703	Hcv1.av93.c1.g39.i4
c1	282033	282049	Hcv1.av93.c1.g41.i1
c1	283405	283489	Hcv1.av93.c1.g39.i4
c1	283405	283489	Hcv1.av93.c1.g39.i1
c1	283405	283489	Hcv1.av93.c1.g39.i3
c1	283405	283489	Hcv1.av93.c1.g39.i2
c1	284659	285569	Hcv1.av93.c1.g42.i1;SII=y
c1	284904	286497	Hcv1.av93.c1.g43.i1;SII=y
c1	286615	287236	Hcv1.av93.c1.g43.i1;SII=y
c1	286947	287037	Hcv1.av93.c1.g42.i1;SII=y
c1	286947	287037	Hcv1.av93.c1.g39.i1
c1	286947	287037	Hcv1.av93.c1.g39.i3
c1	286947	287037	Hcv1.av93.c1.g39.i2
c1	286947	287037	Hcv1.av93.c1.g39.i4
c1	287346	287449	Hcv1.av93.c1.g39.i2
c1	287346	287449	Hcv1.av93.c1.g39.i4
c1	287346	287368	Hcv1.av93.c1.g42.i1;SII=y
c1	287346	287449	Hcv1.av93.c1.g39.i1
c1	287346	287449	Hcv1.av93.c1.g39.i3
c1	287645	287752	Hcv1.av93.c1.g39.i3
c1	287645	287752	Hcv1.av93.c1.g39.i4
c1	287645	287752	Hcv1.av93.c1.g39.i1
c1	287645	287752	Hcv1.av93.c1.g39.i2
c1	287816	287941	Hcv1.av93.c1.g39.i3
c1	287816	287941	Hcv1.av93.c1.g39.i4
c1	287816	287941	Hcv1.av93.c1.g39.i1
c1	287816	287941	Hcv1.av93.c1.g39.i2
c1	288019	288154	Hcv1.av93.c1.g39.i3
c1	288019	288154	Hcv1.av93.c1.g39.i4
c1	288390	288488	Hcv1.av93.c1.g39.i2
c1	288390	288488	Hcv1.av93.c1.g39.i1
c1	288563	288647	Hcv1.av93.c1.g39.i1
c1	288563	288647	Hcv1.av93.c1.g39.i2
c1	288796	288864	Hcv1.av93.c1.g39.i1
c1	288796	288864	Hcv1.av93.c1.g39.i2
c1	289351	289462	Hcv1.av93.c1.g39.i1
c1	289351	289462	Hcv1.av93.c1.g39.i2
c1	289579	289694	Hcv1.av93.c1.g39.i1
c1	289579	289694	Hcv1.av93.c1.g39.i2
c1	289759	289934	Hcv1.av93.c1.g39.i1
c1	289759	289934	Hcv1.av93.c1.g39.i2
c1	290073	290214	Hcv1.av93.c1.g39.i2
c1	290073	290214	Hcv1.av93.c1.g39.i1
c1	290347	290465	Hcv1.av93.c1.g39.i2
c1	290347	290465	Hcv1.av93.c1.g39.i1
c1	290542	290720	Hcv1.av93.c1.g39.i2
c1	290542	290720	Hcv1.av93.c1.g39.i1
c1	290777	290943	Hcv1.av93.c1.g39.i2
c1	290777	290943	Hcv1.av93.c1.g39.i1
c1	291005	291087	Hcv1.av93.c1.g39.i2
c1	291005	291087	Hcv1.av93.c1.g39.i1
c1	291166	291315	Hcv1.av93.c1.g39.i2
c1	291166	291315	Hcv1.av93.c1.g39.i1
c1	291571	291730	Hcv1.av93.c1.g39.i1
c1	291571	291730	Hcv1.av93.c1.g39.i2
c1	291864	291976	Hcv1.av93.c1.g39.i1
c1	291864	291976	Hcv1.av93.c1.g39.i2
c1	292041	292100	Hcv1.av93.c1.g39.i2
c1	292041	292100	Hcv1.av93.c1.g39.i1
c1	292696	292832	Hcv1.av93.c1.g39.i2
c1	292696	292832	Hcv1.av93.c1.g39.i1
c1	292926	292980	Hcv1.av93.c1.g39.i2
c1	292926	292980	Hcv1.av93.c1.g39.i1
c1	293311	293548	Hcv1.av93.c1.g44.i1
c1	293611	293742	Hcv1.av93.c1.g44.i1
c1	293823	293975	Hcv1.av93.c1.g44.i1
c1	294290	294338	Hcv1.av93.c1.g44.i1
c1	294418	294924	Hcv1.av93.c1.g44.i1
c1	304858	305065	Hcv1.av93.c1.g46.i1
c1	305191	305340	Hcv1.av93.c1.g46.i1
c1	305464	305700	Hcv1.av93.c1.g46.i1
c1	305861	305949	Hcv1.av93.c1.g46.i1
c1	306020	306188	Hcv1.av93.c1.g46.i1
c1	306573	306724	Hcv1.av93.c1.g46.i1
c1	306860	307063	Hcv1.av93.c1.g46.i1
c1	309535	309667	Hcv1.av93.c1.g47.i1
c1	309535	309667	Hcv1.av93.c1.g47.i2
c1	309596	309943	Hcv1.av93.c1.g47.i3
c1	309741	309943	Hcv1.av93.c1.g47.i1
c1	309741	309943	Hcv1.av93.c1.g47.i2
c1	310026	310343	Hcv1.av93.c1.g47.i1
c1	310026	310343	Hcv1.av93.c1.g47.i3
c1	310026	310343	Hcv1.av93.c1.g47.i2
c1	310478	310580	Hcv1.av93.c1.g47.i2
c1	310478	310580	Hcv1.av93.c1.g47.i3
c1	310478	310580	Hcv1.av93.c1.g47.i1
c1	310642	310863	Hcv1.av93.c1.g47.i2
c1	310642	310863	Hcv1.av93.c1.g47.i3
c1	310642	310863	Hcv1.av93.c1.g47.i1
c1	310970	311182	Hcv1.av93.c1.g47.i2
c1	310970	311182	Hcv1.av93.c1.g47.i3
c1	310970	311182	Hcv1.av93.c1.g47.i1
c1	311391	311655	Hcv1.av93.c1.g47.i1
c1	311391	311655	Hcv1.av93.c1.g47.i3
c1	311391	311655	Hcv1.av93.c1.g47.i2
c1	311850	312118	Hcv1.av93.c1.g47.i1
c1	311850	312118	Hcv1.av93.c1.g47.i3
c1	311850	312118	Hcv1.av93.c1.g47.i2
c1	312271	312419	Hcv1.av93.c1.g47.i2
c1	312271	312789	Hcv1.av93.c1.g47.i1
c1	312271	312816	Hcv1.av93.c1.g47.i3
c1	312859	313101	Hcv1.av93.c1.g48.i1
c1	312859	313101	Hcv1.av93.c1.g48.i3
c1	312859	313101	Hcv1.av93.c1.g48.i2
c1	312986	313101	Hcv1.av93.c1.g48.i4
c1	313170	313306	Hcv1.av93.c1.g48.i4
c1	313170	313306	Hcv1.av93.c1.g48.i3
c1	313170	313306	Hcv1.av93.c1.g48.i2
c1	313170	313306	Hcv1.av93.c1.g48.i1
c1	313556	313738	Hcv1.av93.c1.g48.i3
c1	313556	314340	Hcv1.av93.c1.g48.i1
c1	313556	313759	Hcv1.av93.c1.g48.i2
c1	313556	313738	Hcv1.av93.c1.g48.i4
c1	314115	314340	Hcv1.av93.c1.g48.i3
c1	314115	314340	Hcv1.av93.c1.g48.i2
c1	314115	314340	Hcv1.av93.c1.g48.i4
c1	314410	314838	Hcv1.av93.c1.g48.i4
c1	314410	314838	Hcv1.av93.c1.g48.i3
c1	314410	314838	Hcv1.av93.c1.g48.i1
c1	314410	314838	Hcv1.av93.c1.g48.i2
c1	314910	315111	Hcv1.av93.c1.g48.i2
c1	314910	315111	Hcv1.av93.c1.g48.i4
c1	314910	315111	Hcv1.av93.c1.g48.i1
c1	314910	315111	Hcv1.av93.c1.g48.i3
c1	320643	321569	Hcv1.av93.c1.g49.i1
c1	322316	322416	Hcv1.av93.c1.g3.i1
c1	325259	325472	Hcv1.av93.c1.g48.i2
c1	325259	325779	Hcv1.av93.c1.g48.i4
c1	325259	325472	Hcv1.av93.c1.g48.i1
c1	325259	325472	Hcv1.av93.c1.g48.i3
c1	325539	325779	Hcv1.av93.c1.g48.i2
c1	325539	325779	Hcv1.av93.c1.g48.i1
c1	325539	325779	Hcv1.av93.c1.g48.i3
c1	325893	326070	Hcv1.av93.c1.g48.i1
c1	325893	326070	Hcv1.av93.c1.g48.i3
c1	325893	326070	Hcv1.av93.c1.g48.i4
c1	325893	326070	Hcv1.av93.c1.g48.i2
c1	326258	326686	Hcv1.av93.c1.g48.i4
c1	326258	326686	Hcv1.av93.c1.g48.i1
c1	326258	326686	Hcv1.av93.c1.g48.i3
c1	326258	326686	Hcv1.av93.c1.g48.i2
c1	326840	326960	Hcv1.av93.c1.g48.i3
c1	326840	326960	Hcv1.av93.c1.g48.i2
c1	326840	326960	Hcv1.av93.c1.g48.i4
c1	326840	326960	Hcv1.av93.c1.g48.i1
c1	327029	327324	Hcv1.av93.c1.g48.i3
c1	327029	327324	Hcv1.av93.c1.g48.i2
c1	327029	327317	Hcv1.av93.c1.g48.i1
c1	327029	327317	Hcv1.av93.c1.g48.i4
c1	329379	329548	Hcv1.av93.c1.g50.i1
c1	329379	329548	Hcv1.av93.c1.g50.i2
c1	329661	329840	Hcv1.av93.c1.g50.i1
c1	329661	329785	Hcv1.av93.c1.g50.i2
c1	330830	330922	Hcv1.av93.c1.g50.i1
c1	330830	330922	Hcv1.av93.c1.g50.i2
c1	335807	335913	Hcv1.av93.c1.g51.i1;SII=y
c1	335969	336054	Hcv1.av93.c1.g51.i1;SII=y
c1	336166	336363	Hcv1.av93.c1.g51.i1;SII=y
c1	336558	336670	Hcv1.av93.c1.g51.i1;SII=y
c1	336777	336872	Hcv1.av93.c1.g51.i1;SII=y
c1	340687	340816	Hcv1.av93.c1.g51.i1;SII=y
c1	341214	341335	Hcv1.av93.c1.g51.i1;SII=y
c1	341692	341775	Hcv1.av93.c1.g51.i1;SII=y
c1	342158	342547	Hcv1.av93.c1.g51.i1;SII=y
c1	342677	342769	Hcv1.av93.c1.g51.i1;SII=y
c1	353014	353151	Hcv1.av93.c1.g52.i1
c1	355274	355334	Hcv1.av93.c1.g52.i1
c1	355423	355535	Hcv1.av93.c1.g52.i1
c1	355867	356134	Hcv1.av93.c1.g52.i1
c1	356273	356447	Hcv1.av93.c1.g52.i1
c1	356855	356956	Hcv1.av93.c1.g52.i1
c1	357076	357248	Hcv1.av93.c1.g52.i1
c1	357453	357552	Hcv1.av93.c1.g52.i1
c1	358242	358332	Hcv1.av93.c1.g52.i1
c1	359222	359313	Hcv1.av93.c1.g52.i1
c1	359515	359610	Hcv1.av93.c1.g52.i1
c1	360749	360981	Hcv1.av93.c1.g53.i2;SII=y
c1	360749	360981	Hcv1.av93.c1.g53.i1;SII=y
c1	361144	361257	Hcv1.av93.c1.g53.i2;SII=y
c1	361144	363449	Hcv1.av93.c1.g53.i1;SII=y
c1	361753	363449	Hcv1.av93.c1.g53.i2;SII=y
c1	363440	363603	Hcv1.av93.c1.g52.i1
c1	363689	363836	Hcv1.av93.c1.g52.i1
c1	364299	364442	Hcv1.av93.c1.g52.i1
c1	364631	364805	Hcv1.av93.c1.g52.i1
c1	364911	365074	Hcv1.av93.c1.g52.i1
c1	365938	366055	Hcv1.av93.c1.g52.i1
c1	368908	369400	Hcv1.av93.c1.g52.i1
c1	369614	369785	Hcv1.av93.c1.g52.i1
c1	369908	370016	Hcv1.av93.c1.g52.i1
c1	370888	371015	Hcv1.av93.c1.g52.i1
c1	371364	371565	Hcv1.av93.c1.g52.i1
c1	371699	371781	Hcv1.av93.c1.g52.i1
c1	372487	372566	Hcv1.av93.c1.g52.i1
c1	400195	400505	Hcv1.av93.c1.g54.i1;SII=y
c1	400653	401735	Hcv1.av93.c1.g54.i1;SII=y
c1	409560	410585	Hcv1.av93.c1.g55.i1
c1	411546	411678	Hcv1.av93.c1.g55.i1
c1	414184	414359	Hcv1.av93.c1.g55.i1
c1	414930	415786	Hcv1.av93.c1.g56.i1
c1	414930	415990	Hcv1.av93.c1.g56.i2
c1	415775	417398	Hcv1.av93.c1.g56.i3
c1	415907	415990	Hcv1.av93.c1.g56.i1
c1	416129	416308	Hcv1.av93.c1.g56.i2
c1	416129	416308	Hcv1.av93.c1.g56.i1
c1	416206	416308	Hcv1.av93.c1.g56.i4
c1	416418	416622	Hcv1.av93.c1.g56.i1
c1	416418	416622	Hcv1.av93.c1.g56.i2
c1	416418	416622	Hcv1.av93.c1.g56.i4
c1	417335	417398	Hcv1.av93.c1.g56.i1
c1	417335	417398	Hcv1.av93.c1.g56.i2
c1	417335	417398	Hcv1.av93.c1.g56.i4
c1	417554	417685	Hcv1.av93.c1.g56.i1
c1	417554	417685	Hcv1.av93.c1.g56.i4
c1	417554	417685	Hcv1.av93.c1.g56.i3
c1	417554	417685	Hcv1.av93.c1.g56.i2
c1	417784	417955	Hcv1.av93.c1.g56.i3
c1	417784	417955	Hcv1.av93.c1.g56.i4
c1	417784	417955	Hcv1.av93.c1.g56.i2
c1	417784	417955	Hcv1.av93.c1.g56.i1
c1	418066	418700	Hcv1.av93.c1.g56.i1
c1	418066	418699	Hcv1.av93.c1.g56.i4
c1	418066	418700	Hcv1.av93.c1.g56.i3
c1	418066	418699	Hcv1.av93.c1.g56.i2
c1	432855	434294	Hcv1.av93.c1.g58.i1;SII=y
c1	437708	438076	Hcv1.av93.c1.g59.i1;SII=y
c1	438168	438402	Hcv1.av93.c1.g59.i1;SII=y
c1	438984	439168	Hcv1.av93.c1.g59.i1;SII=y
c1	439304	439528	Hcv1.av93.c1.g59.i1;SII=y
c1	439614	439782	Hcv1.av93.c1.g59.i1;SII=y
c1	439980	440782	Hcv1.av93.c1.g59.i1;SII=y
c1	442467	442560	Hcv1.av93.c1.g59.i1;SII=y
c1	443180	443432	Hcv1.av93.c1.g60.i1
c1	444830	448210	Hcv1.av93.c1.g61.i1;SII=y
c1	445887	446089	Hcv1.av93.c1.g59.i1;SII=y
c1	450824	450996	Hcv1.av93.c1.g59.i1;SII=y
c1	451488	451599	Hcv1.av93.c1.g62.i1
c1	451488	452156	Hcv1.av93.c1.g62.i2
c1	452020	452156	Hcv1.av93.c1.g62.i1
c1	452259	452419	Hcv1.av93.c1.g62.i1
c1	452259	452419	Hcv1.av93.c1.g62.i2
c1	452507	452663	Hcv1.av93.c1.g62.i1
c1	452507	452663	Hcv1.av93.c1.g62.i2
c1	452786	452919	Hcv1.av93.c1.g62.i1
c1	452786	452919	Hcv1.av93.c1.g62.i2
c1	454528	454839	Hcv1.av93.c1.g62.i2
c1	454528	454839	Hcv1.av93.c1.g62.i1
c1	454913	454937	Hcv1.av93.c1.g63.i3
c1	454913	454937	Hcv1.av93.c1.g63.i1
c1	454913	454937	Hcv1.av93.c1.g63.i2
c1	455016	455165	Hcv1.av93.c1.g63.i1
c1	455016	455165	Hcv1.av93.c1.g63.i2
c1	455016	455165	Hcv1.av93.c1.g63.i3
c1	455955	456103	Hcv1.av93.c1.g63.i1
c1	455955	456103	Hcv1.av93.c1.g63.i2
c1	455955	456103	Hcv1.av93.c1.g63.i3
c1	456254	456428	Hcv1.av93.c1.g63.i3
c1	456254	456428	Hcv1.av93.c1.g63.i2
c1	456254	456428	Hcv1.av93.c1.g63.i1
c1	457082	457226	Hcv1.av93.c1.g63.i3
c1	457082	457226	Hcv1.av93.c1.g63.i1
c1	457082	457778	Hcv1.av93.c1.g63.i2
c1	457595	457778	Hcv1.av93.c1.g63.i3
c1	457595	457778	Hcv1.av93.c1.g63.i1
c1	457845	457956	Hcv1.av93.c1.g63.i2
c1	457845	457956	Hcv1.av93.c1.g63.i1
c1	457845	457956	Hcv1.av93.c1.g63.i3
c1	458116	458133	Hcv1.av93.c1.g63.i3
c1	458207	458309	Hcv1.av93.c1.g63.i1
c1	458207	458309	Hcv1.av93.c1.g63.i2
c1	458207	458309	Hcv1.av93.c1.g63.i3
c1	458802	458930	Hcv1.av93.c1.g63.i2
c1	458802	458930	Hcv1.av93.c1.g63.i1
c1	458802	458930	Hcv1.av93.c1.g63.i3
c1	464143	464447	Hcv1.av93.c1.g64.i1
c1	464846	465018	Hcv1.av93.c1.g64.i1
c1	467608	469531	Hcv1.av93.c1.g64.i1
c1	474885	475070	Hcv1.av93.c1.g65.i1
c1	479318	480453	Hcv1.av93.c1.g66.i1
c1	482305	482433	Hcv1.av93.c1.g65.i1
c1	487822	487998	Hcv1.av93.c1.g65.i1
c1	488146	488253	Hcv1.av93.c1.g65.i1
c1	490037	490060	Hcv1.av93.c1.g60.i1
c1	491613	491849	Hcv1.av93.c1.g65.i1
c1	492072	492215	Hcv1.av93.c1.g65.i1
c1	495250	495405	Hcv1.av93.c1.g65.i1
c1	495621	495729	Hcv1.av93.c1.g65.i1
c1	497886	498166	Hcv1.av93.c1.g65.i1
c1	498225	498324	Hcv1.av93.c1.g65.i1
c1	500492	500776	Hcv1.av93.c1.g65.i1
c1	511592	511726	Hcv1.av93.c1.g67.i1
c1	511986	513308	Hcv1.av93.c1.g67.i1
c1	529220	529433	Hcv1.av93.c1.g68.i1
c1	531834	531954	Hcv1.av93.c1.g68.i2
c1	531835	531954	Hcv1.av93.c1.g68.i1
c1	533552	533643	Hcv1.av93.c1.g68.i1
c1	533552	533643	Hcv1.av93.c1.g68.i2
c1	537193	537328	Hcv1.av93.c1.g68.i1
c1	537193	537328	Hcv1.av93.c1.g68.i2
c1	539973	541246	Hcv1.av93.c1.g69.i1
c1	541996	542110	Hcv1.av93.c1.g68.i3
c1	542002	542110	Hcv1.av93.c1.g68.i1
c1	542002	542110	Hcv1.av93.c1.g68.i2
c1	548892	549010	Hcv1.av93.c1.g68.i1
c1	548892	549010	Hcv1.av93.c1.g68.i2
c1	548892	549010	Hcv1.av93.c1.g68.i3
c1	553388	553849	Hcv1.av93.c1.g71.i1
c1	554424	554641	Hcv1.av93.c1.g71.i1
c1	574202	574627	Hcv1.av93.c1.g73.i1
c1	576500	576771	Hcv1.av93.c1.g74.i1
c1	576886	577041	Hcv1.av93.c1.g74.i1
c1	577183	577315	Hcv1.av93.c1.g74.i1
c1	577429	577850	Hcv1.av93.c1.g74.i1
c1	581854	582033	Hcv1.av93.c1.g73.i1
c1	590423	590536	Hcv1.av93.c1.g73.i1
c1	592799	592897	Hcv1.av93.c1.g73.i1
c1	593240	593443	Hcv1.av93.c1.g75.i1
c1	593240	593443	Hcv1.av93.c1.g75.i2
c1	593538	593717	Hcv1.av93.c1.g75.i1
c1	593538	593717	Hcv1.av93.c1.g75.i2
c1	593855	593938	Hcv1.av93.c1.g75.i1
c1	593855	593938	Hcv1.av93.c1.g75.i2
c1	594059	596015	Hcv1.av93.c1.g75.i1
c1	594984	596378	Hcv1.av93.c1.g75.i3
c1	596782	596847	Hcv1.av93.c1.g75.i2
c1	596975	597086	Hcv1.av93.c1.g75.i2
c1	597332	597423	Hcv1.av93.c1.g75.i3
c1	597577	597749	Hcv1.av93.c1.g75.i2
c1	597581	597749	Hcv1.av93.c1.g75.i3
c1	597882	598000	Hcv1.av93.c1.g75.i2
c1	597882	598000	Hcv1.av93.c1.g75.i3
c1	598087	598180	Hcv1.av93.c1.g75.i3
c1	598087	598180	Hcv1.av93.c1.g75.i2
c1	598337	598353	Hcv1.av93.c1.g75.i2
c1	613424	613725	Hcv1.av93.c1.g76.i1;SII=y
c1	618783	619316	Hcv1.av93.c1.g77.i1
c1	619415	619485	Hcv1.av93.c1.g77.i1
c1	619560	619885	Hcv1.av93.c1.g77.i1
c1	623680	623802	Hcv1.av93.c1.g77.i1
c1	625209	625351	Hcv1.av93.c1.g77.i1
c1	625469	625731	Hcv1.av93.c1.g77.i1
c1	625989	626481	Hcv1.av93.c1.g78.i2
c1	625989	626481	Hcv1.av93.c1.g78.i3
c1	625989	626481	Hcv1.av93.c1.g78.i1
c1	627303	627361	Hcv1.av93.c1.g78.i1
c1	627303	627361	Hcv1.av93.c1.g78.i2
c1	627303	627361	Hcv1.av93.c1.g78.i3
c1	627610	627727	Hcv1.av93.c1.g78.i1
c1	627610	627727	Hcv1.av93.c1.g78.i2
c1	627610	627727	Hcv1.av93.c1.g78.i3
c1	627835	627914	Hcv1.av93.c1.g78.i1
c1	627835	627914	Hcv1.av93.c1.g78.i2
c1	627835	627914	Hcv1.av93.c1.g78.i3
c1	628414	628482	Hcv1.av93.c1.g78.i3
c1	628414	628482	Hcv1.av93.c1.g78.i1
c1	628414	628482	Hcv1.av93.c1.g78.i2
c1	629519	629659	Hcv1.av93.c1.g78.i3
c1	629519	629659	Hcv1.av93.c1.g78.i1
c1	629519	629659	Hcv1.av93.c1.g78.i2
c1	629736	629802	Hcv1.av93.c1.g78.i2
c1	629736	629802	Hcv1.av93.c1.g78.i1
c1	629736	629802	Hcv1.av93.c1.g78.i3
c1	630013	630189	Hcv1.av93.c1.g78.i2
c1	630013	630189	Hcv1.av93.c1.g78.i1
c1	630013	630189	Hcv1.av93.c1.g78.i3
c1	631145	631354	Hcv1.av93.c1.g78.i2
c1	631145	631354	Hcv1.av93.c1.g78.i1
c1	631145	631354	Hcv1.av93.c1.g78.i3
c1	631519	631611	Hcv1.av93.c1.g78.i2
c1	631519	631611	Hcv1.av93.c1.g78.i3
c1	631519	631611	Hcv1.av93.c1.g78.i1
c1	631729	631890	Hcv1.av93.c1.g78.i1
c1	631729	631866	Hcv1.av93.c1.g78.i3
c1	631729	631890	Hcv1.av93.c1.g78.i2
c1	631963	631986	Hcv1.av93.c1.g78.i3
c1	634889	634964	Hcv1.av93.c1.g78.i2
c1	634889	634964	Hcv1.av93.c1.g78.i1
c1	634889	634964	Hcv1.av93.c1.g78.i3
c1	635212	635279	Hcv1.av93.c1.g78.i3
c1	635212	635279	Hcv1.av93.c1.g78.i1
c1	635212	635279	Hcv1.av93.c1.g78.i2
c1	635589	635747	Hcv1.av93.c1.g78.i3
c1	635589	635747	Hcv1.av93.c1.g78.i2
c1	635589	635747	Hcv1.av93.c1.g78.i1
c1	635845	635974	Hcv1.av93.c1.g78.i3
c1	635845	635974	Hcv1.av93.c1.g78.i2
c1	635845	635974	Hcv1.av93.c1.g78.i1
c1	636086	636195	Hcv1.av93.c1.g78.i3
c1	636086	636195	Hcv1.av93.c1.g78.i1
c1	636086	636195	Hcv1.av93.c1.g78.i2
c1	640309	640531	Hcv1.av93.c1.g79.i1
c1	641709	641791	Hcv1.av93.c1.g78.i1
c1	641709	641791	Hcv1.av93.c1.g78.i2
c1	641709	641791	Hcv1.av93.c1.g78.i3
c1	642361	642378	Hcv1.av93.c1.g79.i1
c1	642511	642620	Hcv1.av93.c1.g78.i3
c1	642511	642620	Hcv1.av93.c1.g78.i1
c1	642511	642620	Hcv1.av93.c1.g78.i2
c1	642748	642824	Hcv1.av93.c1.g78.i3
c1	642748	642824	Hcv1.av93.c1.g78.i1
c1	642748	642824	Hcv1.av93.c1.g78.i2
c1	643324	643403	Hcv1.av93.c1.g78.i3
c1	643324	643403	Hcv1.av93.c1.g78.i1
c1	643324	643403	Hcv1.av93.c1.g78.i2
c1	643489	643637	Hcv1.av93.c1.g78.i1
c1	643489	643637	Hcv1.av93.c1.g78.i3
c1	643489	643637	Hcv1.av93.c1.g78.i2
c1	643711	643795	Hcv1.av93.c1.g78.i3
c1	643711	643795	Hcv1.av93.c1.g78.i1
c1	643711	643795	Hcv1.av93.c1.g78.i2
c1	643879	643979	Hcv1.av93.c1.g78.i2
c1	643879	643979	Hcv1.av93.c1.g78.i3
c1	643879	643979	Hcv1.av93.c1.g78.i1
c1	644118	644207	Hcv1.av93.c1.g78.i3
c1	644118	644207	Hcv1.av93.c1.g78.i1
c1	644118	644207	Hcv1.av93.c1.g78.i2
c1	645367	645442	Hcv1.av93.c1.g78.i1
c1	645367	645442	Hcv1.av93.c1.g78.i2
c1	645367	645442	Hcv1.av93.c1.g78.i3
c1	645541	645645	Hcv1.av93.c1.g78.i1
c1	645541	645645	Hcv1.av93.c1.g78.i3
c1	645541	645645	Hcv1.av93.c1.g78.i2
c1	645969	646374	Hcv1.av93.c1.g80.i1
c1	648009	648070	Hcv1.av93.c1.g78.i1
c1	648160	648282	Hcv1.av93.c1.g78.i2
c1	648160	648282	Hcv1.av93.c1.g78.i3
c1	648160	648282	Hcv1.av93.c1.g78.i1
c1	648348	648464	Hcv1.av93.c1.g78.i2
c1	648348	648464	Hcv1.av93.c1.g78.i3
c1	648348	648464	Hcv1.av93.c1.g78.i1
c1	649413	652059	Hcv1.av93.c1.g81.i1;SII=y
c1	654864	656829	Hcv1.av93.c1.g82.i1;SII=y
c1	658354	658394	Hcv1.av93.c1.g78.i2
c1	658354	658394	Hcv1.av93.c1.g78.i1
c1	658354	658394	Hcv1.av93.c1.g78.i3
c1	663438	663489	Hcv1.av93.c1.g83.i1
c1	663438	663489	Hcv1.av93.c1.g83.i2
c1	664032	664105	Hcv1.av93.c1.g83.i1
c1	664032	664105	Hcv1.av93.c1.g83.i2
c1	664244	664396	Hcv1.av93.c1.g83.i2
c1	664244	664396	Hcv1.av93.c1.g83.i1
c1	664663	664772	Hcv1.av93.c1.g83.i1
c1	664663	664772	Hcv1.av93.c1.g83.i2
c1	664882	665087	Hcv1.av93.c1.g83.i1
c1	664882	665087	Hcv1.av93.c1.g83.i2
c1	665220	665630	Hcv1.av93.c1.g84.i1;SII=y
c1	665784	666647	Hcv1.av93.c1.g84.i1;SII=y
c1	669629	669802	Hcv1.av93.c1.g83.i1
c1	669629	669802	Hcv1.av93.c1.g83.i2
c1	670007	670170	Hcv1.av93.c1.g83.i1
c1	670007	670170	Hcv1.av93.c1.g83.i2
c1	672538	672767	Hcv1.av93.c1.g83.i1
c1	672538	672767	Hcv1.av93.c1.g83.i2
c1	672865	672928	Hcv1.av93.c1.g83.i2
c1	672865	672928	Hcv1.av93.c1.g83.i1
c1	678478	678591	Hcv1.av93.c1.g83.i2
c1	678478	678591	Hcv1.av93.c1.g83.i1
c1	678847	679004	Hcv1.av93.c1.g83.i2
c1	678847	679004	Hcv1.av93.c1.g83.i1
c1	679397	679483	Hcv1.av93.c1.g83.i2
c1	679397	679483	Hcv1.av93.c1.g83.i1
c1	681172	681376	Hcv1.av93.c1.g83.i1
c1	681172	681376	Hcv1.av93.c1.g83.i2
c1	681803	681956	Hcv1.av93.c1.g83.i1
c1	681803	681956	Hcv1.av93.c1.g83.i2
c1	682050	682194	Hcv1.av93.c1.g83.i1
c1	682050	682194	Hcv1.av93.c1.g83.i2
c1	682343	682436	Hcv1.av93.c1.g83.i1
c1	682343	682436	Hcv1.av93.c1.g83.i2
c1	682548	682772	Hcv1.av93.c1.g83.i1
c1	682984	683078	Hcv1.av93.c1.g83.i1
c1	682984	683078	Hcv1.av93.c1.g83.i2
c1	683880	683987	Hcv1.av93.c1.g83.i1
c1	683880	683987	Hcv1.av93.c1.g83.i2
c1	684438	684710	Hcv1.av93.c1.g83.i2
c1	684438	684710	Hcv1.av93.c1.g83.i1
c1	685793	687072	Hcv1.av93.c1.g85.i1;SII=y
c1	687379	687519	Hcv1.av93.c1.g85.i1;SII=y
c1	689058	689226	Hcv1.av93.c1.g85.i1;SII=y
c1	690219	690591	Hcv1.av93.c1.g85.i1;SII=y
c1	690720	691077	Hcv1.av93.c1.g85.i1;SII=y
c1	694344	694487	Hcv1.av93.c1.g86.i1;SII=y
c1	694772	694910	Hcv1.av93.c1.g86.i1;SII=y
c1	695066	695294	Hcv1.av93.c1.g86.i1;SII=y
c1	697889	698420	Hcv1.av93.c1.g86.i1;SII=y
c1	698482	698762	Hcv1.av93.c1.g87.i1
c1	699159	699293	Hcv1.av93.c1.g87.i1
c1	699446	699589	Hcv1.av93.c1.g87.i1
c1	699740	699838	Hcv1.av93.c1.g87.i1
c1	700189	700419	Hcv1.av93.c1.g87.i1
c1	700802	700956	Hcv1.av93.c1.g87.i1
c1	701066	701187	Hcv1.av93.c1.g87.i1
c1	701287	701400	Hcv1.av93.c1.g87.i1
c1	701677	701792	Hcv1.av93.c1.g87.i1
c1	701994	702054	Hcv1.av93.c1.g87.i1
c1	702527	702749	Hcv1.av93.c1.g87.i1
c1	702819	702923	Hcv1.av93.c1.g87.i1
c1	703131	705738	Hcv1.av93.c1.g87.i1
c1	703724	704210	Hcv1.av93.c1.g88.i1;SII=y
c1	704434	704754	Hcv1.av93.c1.g88.i3;SII=y
c1	704434	704754	Hcv1.av93.c1.g88.i4;SII=y
c1	704434	704754	Hcv1.av93.c1.g88.i2;SII=y
c1	704434	704754	Hcv1.av93.c1.g88.i5;SII=y
c1	704602	704754	Hcv1.av93.c1.g88.i1;SII=y
c1	705104	705209	Hcv1.av93.c1.g88.i2;SII=y
c1	705351	705515	Hcv1.av93.c1.g88.i4;SII=y
c1	705351	705515	Hcv1.av93.c1.g88.i2;SII=y
c1	706450	706664	Hcv1.av93.c1.g88.i5;SII=y
c1	710282	710419	Hcv1.av93.c1.g88.i5;SII=y
c1	710282	710419	Hcv1.av93.c1.g88.i3;SII=y
c1	710282	710419	Hcv1.av93.c1.g88.i1;SII=y
c1	710282	710419	Hcv1.av93.c1.g88.i2;SII=y
c1	710282	710419	Hcv1.av93.c1.g88.i4;SII=y
c1	711164	711228	Hcv1.av93.c1.g88.i1;SII=y
c1	711164	711228	Hcv1.av93.c1.g88.i2;SII=y
c1	711164	711228	Hcv1.av93.c1.g88.i4;SII=y
c1	711164	711228	Hcv1.av93.c1.g88.i3;SII=y
c1	711164	711228	Hcv1.av93.c1.g88.i5;SII=y
c1	712488	712706	Hcv1.av93.c1.g88.i4;SII=y
c1	712488	712706	Hcv1.av93.c1.g88.i5;SII=y
c1	712488	712706	Hcv1.av93.c1.g88.i3;SII=y
c1	712488	712706	Hcv1.av93.c1.g88.i2;SII=y
c1	712488	712706	Hcv1.av93.c1.g88.i1;SII=y
c1	713269	713454	Hcv1.av93.c1.g88.i4;SII=y
c1	713269	713454	Hcv1.av93.c1.g88.i1;SII=y
c1	713269	713454	Hcv1.av93.c1.g88.i2;SII=y
c1	713269	713454	Hcv1.av93.c1.g88.i3;SII=y
c1	713269	713454	Hcv1.av93.c1.g88.i5;SII=y
c1	714465	714551	Hcv1.av93.c1.g88.i4;SII=y
c1	714465	714551	Hcv1.av93.c1.g88.i1;SII=y
c1	714465	714551	Hcv1.av93.c1.g88.i2;SII=y
c1	714465	714551	Hcv1.av93.c1.g88.i3;SII=y
c1	714465	714551	Hcv1.av93.c1.g88.i5;SII=y
c1	715578	715657	Hcv1.av93.c1.g88.i4;SII=y
c1	715578	715657	Hcv1.av93.c1.g88.i3;SII=y
c1	715578	715657	Hcv1.av93.c1.g88.i2;SII=y
c1	715578	715657	Hcv1.av93.c1.g88.i5;SII=y
c1	715578	715657	Hcv1.av93.c1.g88.i1;SII=y
c1	716546	716663	Hcv1.av93.c1.g88.i4;SII=y
c1	716546	716663	Hcv1.av93.c1.g88.i1;SII=y
c1	716546	716663	Hcv1.av93.c1.g88.i5;SII=y
c1	716546	716663	Hcv1.av93.c1.g88.i3;SII=y
c1	716546	716663	Hcv1.av93.c1.g88.i2;SII=y
c1	716728	716855	Hcv1.av93.c1.g88.i1;SII=y
c1	716728	716855	Hcv1.av93.c1.g88.i5;SII=y
c1	716728	716855	Hcv1.av93.c1.g88.i4;SII=y
c1	716728	716855	Hcv1.av93.c1.g88.i3;SII=y
c1	716728	716855	Hcv1.av93.c1.g88.i2;SII=y
c1	718033	718094	Hcv1.av93.c1.g88.i4;SII=y
c1	718033	718094	Hcv1.av93.c1.g88.i2;SII=y
c1	718033	718094	Hcv1.av93.c1.g88.i1;SII=y
c1	718033	718094	Hcv1.av93.c1.g88.i3;SII=y
c1	718033	718094	Hcv1.av93.c1.g88.i5;SII=y
c1	718183	718349	Hcv1.av93.c1.g88.i5;SII=y
c1	718183	718349	Hcv1.av93.c1.g88.i3;SII=y
c1	718183	718349	Hcv1.av93.c1.g88.i4;SII=y
c1	718183	718349	Hcv1.av93.c1.g88.i2;SII=y
c1	718183	718349	Hcv1.av93.c1.g88.i1;SII=y
c1	719785	721002	Hcv1.av93.c1.g89.i1
c1	721896	721996	Hcv1.av93.c1.g90.i1
c1	721896	721996	Hcv1.av93.c1.g90.i3
c1	721896	721996	Hcv1.av93.c1.g90.i2
c1	723242	723419	Hcv1.av93.c1.g90.i1
c1	723242	723419	Hcv1.av93.c1.g90.i3
c1	723242	723419	Hcv1.av93.c1.g90.i2
c1	723503	723645	Hcv1.av93.c1.g90.i1
c1	723503	723645	Hcv1.av93.c1.g90.i3
c1	723503	723645	Hcv1.av93.c1.g90.i2
c1	723718	724332	Hcv1.av93.c1.g90.i2
c1	723718	724332	Hcv1.av93.c1.g90.i3
c1	723718	724332	Hcv1.av93.c1.g90.i1
c1	724392	724516	Hcv1.av93.c1.g90.i2
c1	724392	724516	Hcv1.av93.c1.g90.i1
c1	724392	724516	Hcv1.av93.c1.g90.i3
c1	725900	726126	Hcv1.av93.c1.g90.i2
c1	725900	726126	Hcv1.av93.c1.g90.i1
c1	725900	726126	Hcv1.av93.c1.g90.i3
c1	726259	726466	Hcv1.av93.c1.g90.i2
c1	726259	726466	Hcv1.av93.c1.g90.i3
c1	726259	726466	Hcv1.av93.c1.g90.i1
c1	726673	726822	Hcv1.av93.c1.g90.i3
c1	726673	726822	Hcv1.av93.c1.g90.i2
c1	726673	726822	Hcv1.av93.c1.g90.i1
c1	728052	728509	Hcv1.av93.c1.g90.i3
c1	728052	728926	Hcv1.av93.c1.g90.i2
c1	728052	728509	Hcv1.av93.c1.g90.i1
c1	728600	728926	Hcv1.av93.c1.g90.i1
c1	728600	728780	Hcv1.av93.c1.g90.i3
c1	728995	729862	Hcv1.av93.c1.g90.i3
c1	729938	730026	Hcv1.av93.c1.g91.i1
c1	729938	730026	Hcv1.av93.c1.g91.i3
c1	729938	730026	Hcv1.av93.c1.g91.i2
c1	730288	732538	Hcv1.av93.c1.g92.i1
c1	733557	733748	Hcv1.av93.c1.g91.i2
c1	733557	733748	Hcv1.av93.c1.g91.i1
c1	733557	733748	Hcv1.av93.c1.g91.i3
c1	735515	736026	Hcv1.av93.c1.g91.i1
c1	735515	736026	Hcv1.av93.c1.g91.i2
c1	735515	736026	Hcv1.av93.c1.g91.i3
c1	737822	737996	Hcv1.av93.c1.g91.i1
c1	737822	737996	Hcv1.av93.c1.g91.i3
c1	737822	737996	Hcv1.av93.c1.g91.i2
c1	738152	738255	Hcv1.av93.c1.g91.i3
c1	738152	738255	Hcv1.av93.c1.g91.i2
c1	738152	738255	Hcv1.av93.c1.g91.i1
c1	738530	738537	Hcv1.av93.c1.g93.i1
c1	739373	739537	Hcv1.av93.c1.g93.i1
c1	739612	739783	Hcv1.av93.c1.g93.i1
c1	739854	739956	Hcv1.av93.c1.g93.i1
c1	739958	739982	Hcv1.av93.c1.g94.i1
c1	740096	740246	Hcv1.av93.c1.g94.i1
c1	740493	740768	Hcv1.av93.c1.g94.i1
c1	740859	741271	Hcv1.av93.c1.g94.i1
c1	741360	741716	Hcv1.av93.c1.g94.i1
c1	741872	741988	Hcv1.av93.c1.g91.i3
c1	741872	741988	Hcv1.av93.c1.g91.i2
c1	741872	741988	Hcv1.av93.c1.g91.i1
c1	742546	742629	Hcv1.av93.c1.g91.i3
c1	742546	742629	Hcv1.av93.c1.g91.i2
c1	742546	742629	Hcv1.av93.c1.g91.i1
c1	742782	742872	Hcv1.av93.c1.g91.i2
c1	742782	742872	Hcv1.av93.c1.g91.i3
c1	742782	742872	Hcv1.av93.c1.g91.i1
c1	742967	743148	Hcv1.av93.c1.g91.i2
c1	742967	743148	Hcv1.av93.c1.g91.i3
c1	742967	743148	Hcv1.av93.c1.g91.i1
c1	743267	743418	Hcv1.av93.c1.g91.i2
c1	743267	743418	Hcv1.av93.c1.g91.i3
c1	743267	743418	Hcv1.av93.c1.g91.i1
c1	743503	743632	Hcv1.av93.c1.g91.i2
c1	743503	743632	Hcv1.av93.c1.g91.i3
c1	743503	743632	Hcv1.av93.c1.g91.i1
c1	744653	744853	Hcv1.av93.c1.g91.i3
c1	744653	744853	Hcv1.av93.c1.g91.i2
c1	744653	744853	Hcv1.av93.c1.g91.i1
c1	745065	745215	Hcv1.av93.c1.g91.i1
c1	745065	745215	Hcv1.av93.c1.g91.i3
c1	745065	745215	Hcv1.av93.c1.g91.i2
c1	745516	745646	Hcv1.av93.c1.g91.i1
c1	745516	745646	Hcv1.av93.c1.g91.i3
c1	745516	745646	Hcv1.av93.c1.g91.i2
c1	745842	745974	Hcv1.av93.c1.g91.i2
c1	745842	745974	Hcv1.av93.c1.g91.i3
c1	745842	745974	Hcv1.av93.c1.g91.i1
c1	747658	748120	Hcv1.av93.c1.g91.i3
c1	747658	748120	Hcv1.av93.c1.g91.i2
c1	747658	748120	Hcv1.av93.c1.g91.i1
c1	748267	748324	Hcv1.av93.c1.g91.i3
c1	748267	748324	Hcv1.av93.c1.g91.i2
c1	748267	748324	Hcv1.av93.c1.g91.i1
c1	749606	749946	Hcv1.av93.c1.g91.i2
c1	749606	749946	Hcv1.av93.c1.g91.i3
c1	749606	749946	Hcv1.av93.c1.g91.i1
c1	750078	750175	Hcv1.av93.c1.g91.i2
c1	750078	750175	Hcv1.av93.c1.g91.i3
c1	750078	750175	Hcv1.av93.c1.g91.i1
c1	750322	750439	Hcv1.av93.c1.g91.i3
c1	750322	750439	Hcv1.av93.c1.g91.i1
c1	750627	750709	Hcv1.av93.c1.g91.i3
c1	750627	750709	Hcv1.av93.c1.g91.i1
c1	751106	751327	Hcv1.av93.c1.g91.i3
c1	751106	751260	Hcv1.av93.c1.g91.i1
c1	751431	751559	Hcv1.av93.c1.g91.i3
c1	752074	752195	Hcv1.av93.c1.g91.i3
c1	752372	752558	Hcv1.av93.c1.g91.i3
c1	753353	754268	Hcv1.av93.c1.g95.i1;SII=y
c1	754568	754678	Hcv1.av93.c1.g91.i3
c1	755090	755213	Hcv1.av93.c1.g91.i3
c1	755526	756301	Hcv1.av93.c1.g91.i3
c1	756397	758397	Hcv1.av93.c1.g96.i1
c1	756397	757222	Hcv1.av93.c1.g96.i2
c1	757313	758397	Hcv1.av93.c1.g96.i2
c1	758493	758720	Hcv1.av93.c1.g96.i1
c1	758493	758720	Hcv1.av93.c1.g96.i2
c1	758981	759105	Hcv1.av93.c1.g96.i1
c1	758981	759105	Hcv1.av93.c1.g96.i2
c1	759239	759642	Hcv1.av93.c1.g96.i1
c1	759239	759642	Hcv1.av93.c1.g96.i2
c1	759694	759782	Hcv1.av93.c1.g97.i1
c1	759903	760555	Hcv1.av93.c1.g97.i1
c1	761969	762191	Hcv1.av93.c1.g97.i1
c1	762635	762745	Hcv1.av93.c1.g97.i1
c1	763150	763275	Hcv1.av93.c1.g97.i1
c1	763396	763563	Hcv1.av93.c1.g97.i1
c1	763766	764443	Hcv1.av93.c1.g97.i1
c1	764544	764657	Hcv1.av93.c1.g97.i1
c1	764957	765167	Hcv1.av93.c1.g97.i1
c1	765292	765735	Hcv1.av93.c1.g97.i1
c1	765856	766025	Hcv1.av93.c1.g97.i1
c1	766146	766999	Hcv1.av93.c1.g98.i1
c1	768787	768988	Hcv1.av93.c1.g97.i1
c1	769220	769373	Hcv1.av93.c1.g97.i1
c1	771629	771746	Hcv1.av93.c1.g97.i1
c1	771948	772244	Hcv1.av93.c1.g97.i1
c1	772360	772851	Hcv1.av93.c1.g99.i1
c1	772982	773140	Hcv1.av93.c1.g99.i1
c1	773463	773579	Hcv1.av93.c1.g99.i1
c1	774072	774404	Hcv1.av93.c1.g99.i1
c1	774492	774658	Hcv1.av93.c1.g99.i1
c1	774739	774819	Hcv1.av93.c1.g99.i1
c1	774928	776304	Hcv1.av93.c1.g99.i1
c1	776403	776676	Hcv1.av93.c1.g99.i1
c1	776760	777247	Hcv1.av93.c1.g99.i1
c1	777341	777508	Hcv1.av93.c1.g99.i1
c1	777680	777935	Hcv1.av93.c1.g99.i1
c1	778082	778448	Hcv1.av93.c1.g99.i1
c1	778560	778680	Hcv1.av93.c1.g99.i1
c1	778804	778945	Hcv1.av93.c1.g99.i1
c1	779053	779398	Hcv1.av93.c1.g99.i1
c1	779479	779576	Hcv1.av93.c1.g99.i1
c1	781182	781453	Hcv1.av93.c1.g100.i1
c1	781583	781703	Hcv1.av93.c1.g100.i1
c1	781804	782040	Hcv1.av93.c1.g100.i1
c1	782386	782534	Hcv1.av93.c1.g100.i1
c1	782692	782795	Hcv1.av93.c1.g100.i1
c1	782997	783188	Hcv1.av93.c1.g100.i1
c1	783566	783693	Hcv1.av93.c1.g100.i1
c1	783914	784034	Hcv1.av93.c1.g100.i1
c1	784789	785855	Hcv1.av93.c1.g101.i1
c1	784789	784879	Hcv1.av93.c1.g101.i2
c1	785073	785252	Hcv1.av93.c1.g100.i1
c1	785619	785855	Hcv1.av93.c1.g101.i2
c1	786346	786498	Hcv1.av93.c1.g101.i2
c1	786346	786498	Hcv1.av93.c1.g101.i1
c1	786667	786858	Hcv1.av93.c1.g101.i1
c1	786667	786858	Hcv1.av93.c1.g101.i2
c1	786971	787203	Hcv1.av93.c1.g101.i1
c1	786971	787203	Hcv1.av93.c1.g101.i2
c1	787287	787371	Hcv1.av93.c1.g101.i1
c1	787287	787371	Hcv1.av93.c1.g101.i2
c1	787499	788011	Hcv1.av93.c1.g101.i1
c1	787499	788011	Hcv1.av93.c1.g101.i2
c1	788138	788389	Hcv1.av93.c1.g101.i1
c1	788138	788389	Hcv1.av93.c1.g101.i2
c1	788543	789146	Hcv1.av93.c1.g101.i2
c1	788543	789146	Hcv1.av93.c1.g101.i1
c1	789263	789393	Hcv1.av93.c1.g101.i2
c1	789263	789393	Hcv1.av93.c1.g101.i1
c1	790513	791111	Hcv1.av93.c1.g102.i1
c1	793517	793582	Hcv1.av93.c1.g101.i2
c1	793517	793582	Hcv1.av93.c1.g101.i1
c1	793744	793818	Hcv1.av93.c1.g101.i2
c1	793744	793818	Hcv1.av93.c1.g101.i1
c1	793944	794050	Hcv1.av93.c1.g101.i2
c1	793944	794050	Hcv1.av93.c1.g101.i1
c1	795531	795592	Hcv1.av93.c1.g101.i2
c1	799240	799330	Hcv1.av93.c1.g101.i1
c1	815567	815678	Hcv1.av93.c1.g103.i1;SII=y
c1	816175	816284	Hcv1.av93.c1.g103.i1;SII=y
c1	816449	816578	Hcv1.av93.c1.g103.i1;SII=y
c1	816951	817160	Hcv1.av93.c1.g103.i1;SII=y
c1	817344	817638	Hcv1.av93.c1.g103.i1;SII=y
c1	817664	818049	Hcv1.av93.c1.g104.i1;SII=y
c1	818212	819215	Hcv1.av93.c1.g104.i1;SII=y
c1	819371	819573	Hcv1.av93.c1.g104.i1;SII=y
c1	819711	820499	Hcv1.av93.c1.g104.i1;SII=y
c1	820600	820860	Hcv1.av93.c1.g104.i1;SII=y
c1	820963	821127	Hcv1.av93.c1.g104.i1;SII=y
c1	821254	821461	Hcv1.av93.c1.g104.i1;SII=y
c1	821635	821786	Hcv1.av93.c1.g104.i1;SII=y
c1	821934	822334	Hcv1.av93.c1.g104.i1;SII=y
c1	822506	822714	Hcv1.av93.c1.g104.i1;SII=y
c1	822802	823044	Hcv1.av93.c1.g104.i1;SII=y
c1	823175	823282	Hcv1.av93.c1.g104.i1;SII=y
c1	823393	823475	Hcv1.av93.c1.g104.i1;SII=y
c1	823595	823794	Hcv1.av93.c1.g104.i1;SII=y
c1	823902	824038	Hcv1.av93.c1.g104.i1;SII=y
c1	824136	825239	Hcv1.av93.c1.g104.i1;SII=y
c1	825371	825541	Hcv1.av93.c1.g104.i1;SII=y
c1	825673	825909	Hcv1.av93.c1.g104.i1;SII=y
c1	826060	826218	Hcv1.av93.c1.g104.i1;SII=y
c1	826410	826748	Hcv1.av93.c1.g104.i1;SII=y
c1	826828	826972	Hcv1.av93.c1.g104.i1;SII=y
c1	827108	827517	Hcv1.av93.c1.g104.i1;SII=y
c1	827681	827962	Hcv1.av93.c1.g104.i1;SII=y
c1	828207	828249	Hcv1.av93.c1.g101.i2
c1	828207	828249	Hcv1.av93.c1.g101.i1
c1	828308	828578	Hcv1.av93.c1.g104.i1;SII=y
c1	829362	830308	Hcv1.av93.c1.g105.i1;SII=y
c1	830394	830639	Hcv1.av93.c1.g105.i1;SII=y
c1	830770	831054	Hcv1.av93.c1.g105.i1;SII=y
c1	831158	831309	Hcv1.av93.c1.g105.i1;SII=y
c1	831454	831871	Hcv1.av93.c1.g105.i1;SII=y
c1	832025	832160	Hcv1.av93.c1.g105.i1;SII=y
c1	832313	832443	Hcv1.av93.c1.g105.i1;SII=y
c1	832633	832777	Hcv1.av93.c1.g105.i1;SII=y
c1	832982	833175	Hcv1.av93.c1.g105.i1;SII=y
c1	832991	833175	Hcv1.av93.c1.g106.i1;SII=y;INT=y
c1	833319	833601	Hcv1.av93.c1.g106.i1;SII=y;INT=y
c1	833319	833601	Hcv1.av93.c1.g105.i1;SII=y
c1	833711	833911	Hcv1.av93.c1.g105.i1;SII=y
c1	833711	833911	Hcv1.av93.c1.g106.i1;SII=y;INT=y
c1	834228	834303	Hcv1.av93.c1.g105.i1;SII=y
c1	834228	834303	Hcv1.av93.c1.g106.i1;SII=y;INT=y
c1	834397	834520	Hcv1.av93.c1.g105.i1;SII=y
c1	834397	834520	Hcv1.av93.c1.g106.i1;SII=y;INT=y
c1	834611	834635	Hcv1.av93.c1.g105.i1;SII=y
c1	834611	835083	Hcv1.av93.c1.g106.i1;SII=y;INT=y
c1	835281	835568	Hcv1.av93.c1.g106.i1;SII=y;INT=y
c1	835708	835992	Hcv1.av93.c1.g106.i1;SII=y;INT=y
c1	836094	836214	Hcv1.av93.c1.g106.i1;SII=y;INT=y
c1	836340	836512	Hcv1.av93.c1.g106.i1;SII=y;INT=y
c1	836705	837007	Hcv1.av93.c1.g106.i1;SII=y;INT=y
c1	837256	837555	Hcv1.av93.c1.g106.i1;SII=y;INT=y
c1	837697	838000	Hcv1.av93.c1.g106.i1;SII=y;INT=y
c1	838129	838275	Hcv1.av93.c1.g106.i1;SII=y;INT=y
c1	838361	838762	Hcv1.av93.c1.g106.i1;SII=y;INT=y
c1	838898	839032	Hcv1.av93.c1.g106.i1;SII=y;INT=y
c1	839315	839464	Hcv1.av93.c1.g106.i1;SII=y;INT=y
c1	839579	839851	Hcv1.av93.c1.g106.i1;SII=y;INT=y
c1	839939	840065	Hcv1.av93.c1.g106.i1;SII=y;INT=y
c1	840355	840642	Hcv1.av93.c1.g106.i1;SII=y;INT=y
c1	843064	843230	Hcv1.av93.c1.g107.i1;SII=y
c1	843064	843230	Hcv1.av93.c1.g107.i2;SII=y
c1	843316	843505	Hcv1.av93.c1.g107.i1;SII=y
c1	843316	843505	Hcv1.av93.c1.g107.i2;SII=y
c1	843581	843715	Hcv1.av93.c1.g107.i1;SII=y
c1	843581	843715	Hcv1.av93.c1.g107.i2;SII=y
c1	843902	844005	Hcv1.av93.c1.g107.i2;SII=y
c1	843902	844005	Hcv1.av93.c1.g107.i1;SII=y
c1	844143	844430	Hcv1.av93.c1.g107.i2;SII=y
c1	844143	844430	Hcv1.av93.c1.g107.i1;SII=y
c1	845074	845184	Hcv1.av93.c1.g107.i2;SII=y
c1	845074	845184	Hcv1.av93.c1.g107.i1;SII=y
c1	848023	848109	Hcv1.av93.c1.g107.i2;SII=y
c1	848325	848479	Hcv1.av93.c1.g107.i2;SII=y
c1	848325	848479	Hcv1.av93.c1.g107.i1;SII=y
c1	848591	848783	Hcv1.av93.c1.g107.i1;SII=y
c1	848591	848783	Hcv1.av93.c1.g107.i2;SII=y
c1	849119	849256	Hcv1.av93.c1.g107.i1;SII=y
c1	849119	849256	Hcv1.av93.c1.g107.i2;SII=y
c1	849634	849779	Hcv1.av93.c1.g107.i1;SII=y
c1	849634	849779	Hcv1.av93.c1.g107.i2;SII=y
c1	851962	852099	Hcv1.av93.c1.g107.i1;SII=y
c1	851962	852099	Hcv1.av93.c1.g107.i2;SII=y
c1	852183	852229	Hcv1.av93.c1.g107.i1;SII=y
c1	852183	852229	Hcv1.av93.c1.g107.i2;SII=y
c1	852362	852494	Hcv1.av93.c1.g107.i1;SII=y
c1	852362	852494	Hcv1.av93.c1.g107.i2;SII=y
c1	852695	852893	Hcv1.av93.c1.g107.i1;SII=y
c1	852695	852893	Hcv1.av93.c1.g107.i2;SII=y
c1	853037	853720	Hcv1.av93.c1.g107.i1;SII=y
c1	853037	853720	Hcv1.av93.c1.g107.i2;SII=y
c1	853990	854160	Hcv1.av93.c1.g108.i1
c1	854372	854462	Hcv1.av93.c1.g108.i1
c1	854610	854768	Hcv1.av93.c1.g108.i1
c1	854907	855097	Hcv1.av93.c1.g108.i1
c1	857864	860143	Hcv1.av93.c1.g109.i1
c1	860266	860388	Hcv1.av93.c1.g109.i1
c1	860511	860681	Hcv1.av93.c1.g109.i1
c1	860855	860973	Hcv1.av93.c1.g109.i1
c1	861095	861205	Hcv1.av93.c1.g109.i1
c1	862968	863070	Hcv1.av93.c1.g109.i1
c1	863125	863556	Hcv1.av93.c1.g110.i1;SII=y;INT=y
c1	864580	864683	Hcv1.av93.c1.g110.i1;SII=y;INT=y
c1	864781	864886	Hcv1.av93.c1.g110.i1;SII=y;INT=y
c1	864999	865088	Hcv1.av93.c1.g110.i1;SII=y;INT=y
c1	865243	865450	Hcv1.av93.c1.g110.i1;SII=y;INT=y
c1	865607	865764	Hcv1.av93.c1.g110.i1;SII=y;INT=y
c1	865868	866127	Hcv1.av93.c1.g110.i1;SII=y;INT=y
c1	866253	866441	Hcv1.av93.c1.g110.i1;SII=y;INT=y
c1	866911	867043	Hcv1.av93.c1.g110.i1;SII=y;INT=y
c1	867238	867414	Hcv1.av93.c1.g110.i1;SII=y;INT=y
c1	867715	867809	Hcv1.av93.c1.g110.i1;SII=y;INT=y
c1	867966	868300	Hcv1.av93.c1.g111.i1;SII=y;INT=y
c1	867966	868700	Hcv1.av93.c1.g111.i2;SII=y;INT=y
c1	868484	868700	Hcv1.av93.c1.g111.i1;SII=y;INT=y
c1	868858	868946	Hcv1.av93.c1.g111.i1;SII=y;INT=y
c1	868858	868946	Hcv1.av93.c1.g111.i2;SII=y;INT=y
c1	869021	869141	Hcv1.av93.c1.g111.i1;SII=y;INT=y
c1	869021	869141	Hcv1.av93.c1.g111.i2;SII=y;INT=y
c1	869205	869374	Hcv1.av93.c1.g111.i1;SII=y;INT=y
c1	869205	869374	Hcv1.av93.c1.g111.i2;SII=y;INT=y
c1	869618	869884	Hcv1.av93.c1.g111.i1;SII=y;INT=y
c1	869618	869884	Hcv1.av93.c1.g111.i2;SII=y;INT=y
c1	873728	874636	Hcv1.av93.c1.g112.i3;SII=y
c1	873728	874234	Hcv1.av93.c1.g112.i2;SII=y
c1	873728	875487	Hcv1.av93.c1.g112.i1;SII=y
c1	874335	876547	Hcv1.av93.c1.g112.i2;SII=y
c1	874692	876547	Hcv1.av93.c1.g112.i3;SII=y
c1	875544	876547	Hcv1.av93.c1.g112.i1;SII=y
c1	877190	877296	Hcv1.av93.c1.g111.i1;SII=y;INT=y
c1	877190	877296	Hcv1.av93.c1.g111.i2;SII=y;INT=y
c1	877663	877822	Hcv1.av93.c1.g111.i1;SII=y;INT=y
c1	877663	877822	Hcv1.av93.c1.g111.i2;SII=y;INT=y
c1	878335	878502	Hcv1.av93.c1.g111.i2;SII=y;INT=y
c1	878335	878502	Hcv1.av93.c1.g111.i1;SII=y;INT=y
c1	878569	878661	Hcv1.av93.c1.g111.i1;SII=y;INT=y
c1	878569	878661	Hcv1.av93.c1.g111.i2;SII=y;INT=y
c1	878771	878874	Hcv1.av93.c1.g111.i1;SII=y;INT=y
c1	878771	878874	Hcv1.av93.c1.g111.i2;SII=y;INT=y
c1	878942	879120	Hcv1.av93.c1.g111.i2;SII=y;INT=y
c1	878942	879120	Hcv1.av93.c1.g111.i1;SII=y;INT=y
c1	879197	879347	Hcv1.av93.c1.g111.i2;SII=y;INT=y
c1	879197	879347	Hcv1.av93.c1.g111.i1;SII=y;INT=y
c1	879440	879600	Hcv1.av93.c1.g111.i2;SII=y;INT=y
c1	879440	879600	Hcv1.av93.c1.g111.i1;SII=y;INT=y
c1	881581	882946	Hcv1.av93.c1.g113.i1;SII=y;INT=y
c1	884246	885313	Hcv1.av93.c1.g113.i1;SII=y;INT=y
c1	889237	890047	Hcv1.av93.c1.g113.i1;SII=y;INT=y
c1	890005	890047	Hcv1.av93.c1.g106.i1;SII=y;INT=y
c1	890005	890047	Hcv1.av93.c1.g111.i2;SII=y;INT=y
c1	890005	890047	Hcv1.av93.c1.g111.i1;SII=y;INT=y
c1	890005	890047	Hcv1.av93.c1.g110.i1;SII=y;INT=y
c1	890005	890047	Hcv1.av93.c1.g109.i1
c1	901577	901749	Hcv1.av93.c1.g115.i3;INT=y
c1	901577	901749	Hcv1.av93.c1.g115.i4;INT=y
c1	901844	902581	Hcv1.av93.c1.g115.i4;INT=y
c1	901844	903444	Hcv1.av93.c1.g115.i3;INT=y
c1	903614	904435	Hcv1.av93.c1.g115.i5;INT=y
c1	904677	904743	Hcv1.av93.c1.g115.i5;INT=y
c1	905105	905510	Hcv1.av93.c1.g115.i5;INT=y
c1	905361	905510	Hcv1.av93.c1.g115.i1;INT=y
c1	907675	907899	Hcv1.av93.c1.g116.i1
c1	908950	909098	Hcv1.av93.c1.g115.i2;INT=y
c1	909218	909556	Hcv1.av93.c1.g115.i2;INT=y
c1	909218	909556	Hcv1.av93.c1.g115.i5;INT=y
c1	909218	909556	Hcv1.av93.c1.g115.i1;INT=y
c1	909725	909957	Hcv1.av93.c1.g115.i2;INT=y
c1	909725	909957	Hcv1.av93.c1.g115.i5;INT=y
c1	909725	909957	Hcv1.av93.c1.g115.i1;INT=y
c1	910080	910460	Hcv1.av93.c1.g115.i2;INT=y
c1	910080	910460	Hcv1.av93.c1.g115.i5;INT=y
c1	910080	910460	Hcv1.av93.c1.g115.i1;INT=y
c1	910608	911122	Hcv1.av93.c1.g115.i5;INT=y
c1	910608	910740	Hcv1.av93.c1.g115.i1;INT=y
c1	910608	910740	Hcv1.av93.c1.g115.i2;INT=y
c1	910850	911122	Hcv1.av93.c1.g115.i2;INT=y
c1	910850	911122	Hcv1.av93.c1.g115.i1;INT=y
c1	911248	911627	Hcv1.av93.c1.g115.i2;INT=y
c1	911248	911627	Hcv1.av93.c1.g115.i1;INT=y
c1	911248	911626	Hcv1.av93.c1.g115.i5;INT=y
c1	911687	912726	Hcv1.av93.c1.g117.i1
c1	912969	913612	Hcv1.av93.c1.g118.i1
c1	913808	914062	Hcv1.av93.c1.g118.i1
c1	914177	914290	Hcv1.av93.c1.g118.i1
c1	914443	915073	Hcv1.av93.c1.g118.i1
c1	915210	915356	Hcv1.av93.c1.g118.i1
c1	915461	915598	Hcv1.av93.c1.g118.i1
c1	915802	915978	Hcv1.av93.c1.g118.i1
c1	920911	922004	Hcv1.av93.c1.g120.i1
c1	922135	922164	Hcv1.av93.c1.g120.i1
c1	922679	922778	Hcv1.av93.c1.g120.i1
c1	923098	923662	Hcv1.av93.c1.g120.i1
c1	923783	923820	Hcv1.av93.c1.g120.i1
c1	926340	926604	Hcv1.av93.c1.g120.i1
c1	926736	926845	Hcv1.av93.c1.g120.i1
c1	926941	927037	Hcv1.av93.c1.g120.i1
c1	927335	927475	Hcv1.av93.c1.g120.i1
c1	930524	930587	Hcv1.av93.c1.g120.i1
c1	930827	930886	Hcv1.av93.c1.g120.i1
c1	933055	934250	Hcv1.av93.c1.g121.i2
c1	934101	934250	Hcv1.av93.c1.g121.i1
c1	934409	934525	Hcv1.av93.c1.g121.i1
c1	934409	934525	Hcv1.av93.c1.g121.i2
c1	934720	934915	Hcv1.av93.c1.g121.i1
c1	934720	934915	Hcv1.av93.c1.g121.i2
c1	935248	935402	Hcv1.av93.c1.g121.i1
c1	935248	935402	Hcv1.av93.c1.g121.i2
c1	935571	935925	Hcv1.av93.c1.g121.i1
c1	935571	935925	Hcv1.av93.c1.g121.i2
c1	936493	937664	Hcv1.av93.c1.g122.i1
c1	938189	939152	Hcv1.av93.c1.g123.i1
c1	938189	938714	Hcv1.av93.c1.g123.i2
c1	939263	939368	Hcv1.av93.c1.g123.i1
c1	939502	940185	Hcv1.av93.c1.g123.i1
c1	939502	940185	Hcv1.av93.c1.g123.i2
c1	940252	940366	Hcv1.av93.c1.g123.i1
c1	940252	940366	Hcv1.av93.c1.g123.i2
c1	940528	940824	Hcv1.av93.c1.g123.i1
c1	940528	940824	Hcv1.av93.c1.g123.i2
c1	940943	941235	Hcv1.av93.c1.g123.i1
c1	940943	941235	Hcv1.av93.c1.g123.i2
c1	941303	942043	Hcv1.av93.c1.g123.i1
c1	941303	942043	Hcv1.av93.c1.g123.i2
c1	950751	951145	Hcv1.av93.c1.g125.i1
c1	951421	951552	Hcv1.av93.c1.g125.i1
c1	951707	951869	Hcv1.av93.c1.g125.i1
c1	952029	952205	Hcv1.av93.c1.g125.i1
c1	952365	952493	Hcv1.av93.c1.g125.i1
c1	952597	952725	Hcv1.av93.c1.g125.i1
c1	955862	956048	Hcv1.av93.c1.g126.i1
c1	956385	956603	Hcv1.av93.c1.g126.i1
c1	956948	957195	Hcv1.av93.c1.g126.i1
c1	957976	958162	Hcv1.av93.c1.g126.i1
c1	958445	958575	Hcv1.av93.c1.g126.i1
c1	958941	959070	Hcv1.av93.c1.g126.i1
c1	959645	959725	Hcv1.av93.c1.g126.i1
c1	959888	960026	Hcv1.av93.c1.g126.i1
c1	960447	960580	Hcv1.av93.c1.g126.i1
c1	960712	961164	Hcv1.av93.c1.g126.i1
c1	961413	961659	Hcv1.av93.c1.g127.i1
c1	964981	965246	Hcv1.av93.c1.g127.i1
c1	965344	965537	Hcv1.av93.c1.g127.i1
c1	965790	965865	Hcv1.av93.c1.g127.i1
c1	965961	966107	Hcv1.av93.c1.g127.i1
c1	966165	967900	Hcv1.av93.c1.g128.i1
c1	970320	970540	Hcv1.av93.c1.g129.i1
c1	972641	972886	Hcv1.av93.c1.g129.i1
c1	972997	973202	Hcv1.av93.c1.g129.i1
c1	973469	973690	Hcv1.av93.c1.g129.i1
c1	973853	974188	Hcv1.av93.c1.g129.i1
c1	974314	974445	Hcv1.av93.c1.g129.i1
c1	974548	974618	Hcv1.av93.c1.g129.i1
c1	974735	975131	Hcv1.av93.c1.g129.i1
c1	976997	977091	Hcv1.av93.c1.g130.i1
c1	977220	977324	Hcv1.av93.c1.g130.i1
c1	977405	977794	Hcv1.av93.c1.g130.i1
c1	977863	977950	Hcv1.av93.c1.g131.i1
c1	978019	978142	Hcv1.av93.c1.g131.i1
c1	978232	978399	Hcv1.av93.c1.g131.i1
c1	978570	978709	Hcv1.av93.c1.g131.i1
c1	978896	978976	Hcv1.av93.c1.g131.i1
c1	980901	982580	Hcv1.av93.c1.g132.i1
c1	983672	984215	Hcv1.av93.c1.g133.i1
c1	984462	984599	Hcv1.av93.c1.g133.i1
c1	984782	984906	Hcv1.av93.c1.g133.i1
c1	985031	985233	Hcv1.av93.c1.g133.i1
c1	985359	985423	Hcv1.av93.c1.g133.i1
c1	985669	985712	Hcv1.av93.c1.g133.i1
c1	986253	986793	Hcv1.av93.c1.g134.i1
c1	986874	987042	Hcv1.av93.c1.g134.i1
c1	987137	987182	Hcv1.av93.c1.g134.i1
c1	987290	987649	Hcv1.av93.c1.g134.i1
c1	987982	988758	Hcv1.av93.c1.g135.i1
c1	989104	989235	Hcv1.av93.c1.g135.i1
c1	991717	993541	Hcv1.av93.c1.g135.i1
c1	993748	993913	Hcv1.av93.c1.g135.i1
c1	995129	997522	Hcv1.av93.c1.g136.i1
c1	1000139	1000285	Hcv1.av93.c1.g138.i2
c1	1000139	1001061	Hcv1.av93.c1.g138.i3
c1	1000139	1000321	Hcv1.av93.c1.g138.i1
c1	1000478	1001061	Hcv1.av93.c1.g138.i1
c1	1000603	1001061	Hcv1.av93.c1.g138.i2
c1	1001189	1001345	Hcv1.av93.c1.g138.i1
c1	1001189	1001345	Hcv1.av93.c1.g138.i3
c1	1001189	1001345	Hcv1.av93.c1.g138.i2
c1	1001580	1001674	Hcv1.av93.c1.g138.i3
c1	1001580	1001674	Hcv1.av93.c1.g138.i2
c1	1001580	1001674	Hcv1.av93.c1.g138.i1
c1	1001797	1002044	Hcv1.av93.c1.g138.i2
c1	1001797	1002044	Hcv1.av93.c1.g138.i1
c1	1001797	1002044	Hcv1.av93.c1.g138.i3
c1	1002114	1002192	Hcv1.av93.c1.g138.i2
c1	1002114	1002192	Hcv1.av93.c1.g138.i1
c1	1002114	1002192	Hcv1.av93.c1.g138.i3
c1	1002445	1002569	Hcv1.av93.c1.g138.i1
c1	1002445	1002569	Hcv1.av93.c1.g138.i2
c1	1002445	1002569	Hcv1.av93.c1.g138.i3
c1	1002645	1002786	Hcv1.av93.c1.g138.i1
c1	1002645	1002786	Hcv1.av93.c1.g138.i2
c1	1002645	1002786	Hcv1.av93.c1.g138.i3
c1	1002928	1003168	Hcv1.av93.c1.g138.i1
c1	1002928	1003168	Hcv1.av93.c1.g138.i3
c1	1002928	1003168	Hcv1.av93.c1.g138.i2
c1	1003270	1003329	Hcv1.av93.c1.g138.i1
c1	1003270	1003329	Hcv1.av93.c1.g138.i2
c1	1003270	1003329	Hcv1.av93.c1.g138.i3
c1	1019440	1021264	Hcv1.av93.c1.g140.i1;SII=y
c1	1021974	1021978	Hcv1.av93.c1.g140.i1;SII=y
c1	1024008	1025058	Hcv1.av93.c1.g140.i1;SII=y
c1	1025858	1026179	Hcv1.av93.c1.g141.i1
c1	1026277	1026417	Hcv1.av93.c1.g141.i1
c1	1026595	1026711	Hcv1.av93.c1.g141.i1
c1	1027349	1027494	Hcv1.av93.c1.g141.i1
c1	1027673	1027819	Hcv1.av93.c1.g141.i1
c1	1027998	1028242	Hcv1.av93.c1.g141.i1
c1	1028357	1028627	Hcv1.av93.c1.g141.i1
c1	1028977	1029095	Hcv1.av93.c1.g141.i1
c1	1029242	1029383	Hcv1.av93.c1.g141.i1
c1	1029700	1029849	Hcv1.av93.c1.g141.i1
c1	1029983	1030170	Hcv1.av93.c1.g141.i1
c1	1031574	1031798	Hcv1.av93.c1.g141.i1
c1	1035271	1035355	Hcv1.av93.c1.g142.i1
c1	1035413	1035478	Hcv1.av93.c1.g142.i1
c1	1035621	1036053	Hcv1.av93.c1.g142.i1
c1	1036194	1036391	Hcv1.av93.c1.g142.i1
c1	1036569	1037576	Hcv1.av93.c1.g142.i1
c1	1037767	1037890	Hcv1.av93.c1.g142.i1
c1	1038217	1038319	Hcv1.av93.c1.g142.i1
c1	1038614	1038802	Hcv1.av93.c1.g142.i1
c1	1038882	1038986	Hcv1.av93.c1.g142.i1
c1	1039088	1039192	Hcv1.av93.c1.g142.i1
c1	1039563	1040044	Hcv1.av93.c1.g142.i1
c1	1041179	1041596	Hcv1.av93.c1.g143.i1
c1	1041774	1041956	Hcv1.av93.c1.g143.i1
c1	1042131	1042267	Hcv1.av93.c1.g143.i1
c1	1042416	1042522	Hcv1.av93.c1.g143.i1
c1	1042567	1043500	Hcv1.av93.c1.g144.i1
c1	1043693	1043817	Hcv1.av93.c1.g144.i1
c1	1043927	1044026	Hcv1.av93.c1.g143.i1
c1	1044225	1044780	Hcv1.av93.c1.g145.i3;SII=y
c1	1044225	1046402	Hcv1.av93.c1.g145.i1;SII=y
c1	1044225	1045001	Hcv1.av93.c1.g145.i2;SII=y
c1	1044870	1046402	Hcv1.av93.c1.g145.i3;SII=y
c1	1045045	1046402	Hcv1.av93.c1.g145.i2;SII=y
c1	1046536	1046666	Hcv1.av93.c1.g145.i2;SII=y
c1	1046536	1046666	Hcv1.av93.c1.g145.i3;SII=y
c1	1046536	1046666	Hcv1.av93.c1.g145.i1;SII=y
c1	1046757	1046942	Hcv1.av93.c1.g143.i1
c1	1047032	1047125	Hcv1.av93.c1.g143.i1
c1	1047402	1047523	Hcv1.av93.c1.g143.i1
c1	1047661	1048191	Hcv1.av93.c1.g143.i1
c1	1050322	1051375	Hcv1.av93.c1.g146.i1
c1	1052254	1052374	Hcv1.av93.c1.g146.i1
c1	1053160	1053287	Hcv1.av93.c1.g146.i1
c1	1053859	1054004	Hcv1.av93.c1.g146.i1
c1	1054614	1054740	Hcv1.av93.c1.g146.i1
c1	1054867	1055006	Hcv1.av93.c1.g146.i1
c1	1055956	1057445	Hcv1.av93.c1.g147.i1;SII=y
c1	1057414	1057591	Hcv1.av93.c1.g146.i1
c1	1057833	1057930	Hcv1.av93.c1.g146.i1
c1	1058508	1059254	Hcv1.av93.c1.g148.i1
c1	1058508	1059254	Hcv1.av93.c1.g148.i2
c1	1059439	1059530	Hcv1.av93.c1.g148.i1
c1	1059439	1059530	Hcv1.av93.c1.g148.i2
c1	1059803	1059970	Hcv1.av93.c1.g148.i1
c1	1059803	1059970	Hcv1.av93.c1.g148.i2
c1	1060076	1060252	Hcv1.av93.c1.g148.i1
c1	1060076	1060252	Hcv1.av93.c1.g148.i2
c1	1060524	1060736	Hcv1.av93.c1.g148.i1
c1	1060524	1060736	Hcv1.av93.c1.g148.i2
c1	1061100	1061306	Hcv1.av93.c1.g148.i1
c1	1061100	1061306	Hcv1.av93.c1.g148.i2
c1	1062766	1063056	Hcv1.av93.c1.g148.i1
c1	1062766	1063056	Hcv1.av93.c1.g148.i2
c1	1063137	1063286	Hcv1.av93.c1.g148.i1
c1	1063137	1063286	Hcv1.av93.c1.g148.i2
c1	1063445	1063824	Hcv1.av93.c1.g148.i1
c1	1063445	1063824	Hcv1.av93.c1.g148.i2
c1	1063913	1065346	Hcv1.av93.c1.g148.i2
c1	1063913	1066133	Hcv1.av93.c1.g148.i1
c1	1065413	1066133	Hcv1.av93.c1.g148.i2
c1	1066560	1067045	Hcv1.av93.c1.g149.i1
c1	1067169	1067247	Hcv1.av93.c1.g149.i1
c1	1067417	1067562	Hcv1.av93.c1.g149.i1
c1	1067657	1067791	Hcv1.av93.c1.g149.i1
c1	1067979	1068110	Hcv1.av93.c1.g149.i1
c1	1068222	1068423	Hcv1.av93.c1.g149.i1
c1	1068563	1068662	Hcv1.av93.c1.g149.i1
c1	1068812	1069037	Hcv1.av93.c1.g149.i1
c1	1069134	1069307	Hcv1.av93.c1.g149.i1
c1	1069522	1069622	Hcv1.av93.c1.g149.i1
c1	1069741	1069790	Hcv1.av93.c1.g149.i1
c1	1069879	1070004	Hcv1.av93.c1.g149.i1
c1	1070133	1072015	Hcv1.av93.c1.g150.i1
c1	1076625	1076772	Hcv1.av93.c1.g153.i1;INT=y
c1	1076858	1077691	Hcv1.av93.c1.g153.i1;INT=y
c1	1077690	1077755	Hcv1.av93.c1.g154.i1;INT=y
c1	1078396	1079859	Hcv1.av93.c1.g154.i1;INT=y
c1	1079996	1080106	Hcv1.av93.c1.g154.i1;INT=y
c1	1080267	1080695	Hcv1.av93.c1.g154.i1;INT=y
c1	1080828	1081113	Hcv1.av93.c1.g154.i1;INT=y
c1	1081189	1081380	Hcv1.av93.c1.g154.i1;INT=y
c1	1081460	1081673	Hcv1.av93.c1.g154.i1;INT=y
c1	1081746	1082975	Hcv1.av93.c1.g154.i1;INT=y
c1	1083557	1083659	Hcv1.av93.c1.g154.i1;INT=y
c1	1083816	1084192	Hcv1.av93.c1.g154.i1;INT=y
c1	1084283	1084480	Hcv1.av93.c1.g154.i1;INT=y
c1	1084556	1084890	Hcv1.av93.c1.g154.i1;INT=y
c1	1086592	1087267	Hcv1.av93.c1.g155.i2
c1	1087904	1088203	Hcv1.av93.c1.g155.i2
c1	1087904	1088203	Hcv1.av93.c1.g155.i3
c1	1087904	1088203	Hcv1.av93.c1.g155.i1
c1	1088329	1088577	Hcv1.av93.c1.g155.i2
c1	1088329	1088577	Hcv1.av93.c1.g155.i1
c1	1088329	1088577	Hcv1.av93.c1.g155.i3
c1	1088664	1088945	Hcv1.av93.c1.g155.i2
c1	1088664	1088945	Hcv1.av93.c1.g155.i1
c1	1088664	1088945	Hcv1.av93.c1.g155.i3
c1	1090925	1091200	Hcv1.av93.c1.g157.i1
c1	1092068	1092351	Hcv1.av93.c1.g157.i1
c1	1092483	1092624	Hcv1.av93.c1.g157.i1
c1	1092748	1092880	Hcv1.av93.c1.g157.i1
c1	1092986	1093362	Hcv1.av93.c1.g157.i1
c1	1093480	1093593	Hcv1.av93.c1.g157.i1
c1	1093694	1094035	Hcv1.av93.c1.g157.i1
c1	1094277	1094755	Hcv1.av93.c1.g158.i1
c1	1094858	1095144	Hcv1.av93.c1.g158.i1
c1	1095287	1095363	Hcv1.av93.c1.g158.i1
c1	1095468	1095504	Hcv1.av93.c1.g158.i1
c1	1095764	1095953	Hcv1.av93.c1.g158.i1
c1	1096089	1096313	Hcv1.av93.c1.g158.i1
c1	1096462	1096559	Hcv1.av93.c1.g158.i1
c1	1096692	1096833	Hcv1.av93.c1.g158.i1
c1	1097656	1097806	Hcv1.av93.c1.g158.i1
c1	1097972	1098613	Hcv1.av93.c1.g159.i1
c1	1098719	1098824	Hcv1.av93.c1.g159.i1
c1	1099358	1099435	Hcv1.av93.c1.g159.i1
c1	1100638	1100669	Hcv1.av93.c1.g159.i1
c1	1100776	1100922	Hcv1.av93.c1.g159.i1
c1	1105706	1105855	Hcv1.av93.c1.g160.i1
c1	1106040	1106298	Hcv1.av93.c1.g160.i1
c1	1106396	1106490	Hcv1.av93.c1.g160.i1
c1	1106864	1106940	Hcv1.av93.c1.g160.i1
c1	1107033	1107066	Hcv1.av93.c1.g160.i1
c1	1107213	1107296	Hcv1.av93.c1.g160.i1
c1	1107517	1107696	Hcv1.av93.c1.g160.i1
c1	1107774	1107938	Hcv1.av93.c1.g160.i1
c1	1108029	1108220	Hcv1.av93.c1.g160.i1
c1	1109360	1109474	Hcv1.av93.c1.g160.i1
c1	1109558	1109749	Hcv1.av93.c1.g160.i1
c1	1109869	1110102	Hcv1.av93.c1.g160.i1
c1	1110207	1110550	Hcv1.av93.c1.g160.i1
c1	1110642	1111004	Hcv1.av93.c1.g160.i1
c1	1111264	1111515	Hcv1.av93.c1.g161.i2
c1	1111264	1111515	Hcv1.av93.c1.g161.i1
c1	1111600	1111693	Hcv1.av93.c1.g161.i1
c1	1111600	1111693	Hcv1.av93.c1.g161.i2
c1	1111877	1112663	Hcv1.av93.c1.g161.i1
c1	1111877	1112699	Hcv1.av93.c1.g161.i2
c1	1114077	1114847	Hcv1.av93.c1.g161.i2
c1	1114098	1114188	Hcv1.av93.c1.g161.i1
c1	1114247	1114847	Hcv1.av93.c1.g161.i1
c1	1114980	1115144	Hcv1.av93.c1.g161.i1
c1	1114980	1115144	Hcv1.av93.c1.g161.i2
c1	1115303	1115425	Hcv1.av93.c1.g161.i1
c1	1115303	1115425	Hcv1.av93.c1.g161.i2
c1	1115601	1116133	Hcv1.av93.c1.g162.i1
c1	1116346	1116587	Hcv1.av93.c1.g162.i1
c1	1119464	1119622	Hcv1.av93.c1.g161.i1
c1	1119464	1119622	Hcv1.av93.c1.g161.i2
c1	1119728	1119940	Hcv1.av93.c1.g161.i2
c1	1119728	1119940	Hcv1.av93.c1.g161.i1
c1	1120050	1120242	Hcv1.av93.c1.g161.i1
c1	1120050	1120242	Hcv1.av93.c1.g161.i2
c1	1120340	1120602	Hcv1.av93.c1.g161.i2
c1	1120340	1120602	Hcv1.av93.c1.g161.i1
c1	1120717	1121642	Hcv1.av93.c1.g161.i2
c1	1120717	1121642	Hcv1.av93.c1.g161.i1
c1	1121816	1121935	Hcv1.av93.c1.g161.i1
c1	1121816	1121935	Hcv1.av93.c1.g161.i2
c1	1122048	1123660	Hcv1.av93.c1.g161.i2
c1	1122048	1123660	Hcv1.av93.c1.g161.i1
c1	1123801	1123843	Hcv1.av93.c1.g163.i1
c1	1125151	1128377	Hcv1.av93.c1.g163.i1
c1	1129914	1132239	Hcv1.av93.c1.g164.i1
c1	1132894	1133045	Hcv1.av93.c1.g164.i1
c1	1135729	1135866	Hcv1.av93.c1.g164.i1
c1	1136347	1136462	Hcv1.av93.c1.g164.i1
c1	1136621	1136758	Hcv1.av93.c1.g164.i1
c1	1137185	1137392	Hcv1.av93.c1.g164.i1
c1	1137591	1137686	Hcv1.av93.c1.g164.i1
c1	1138627	1138851	Hcv1.av93.c1.g164.i1
c1	1138940	1139127	Hcv1.av93.c1.g164.i1
c1	1142873	1143005	Hcv1.av93.c1.g167.i1
c1	1143095	1143317	Hcv1.av93.c1.g167.i1
c1	1143394	1143567	Hcv1.av93.c1.g167.i1
c1	1143655	1144755	Hcv1.av93.c1.g167.i1
c1	1144906	1145120	Hcv1.av93.c1.g168.i1
c1	1145223	1145365	Hcv1.av93.c1.g168.i1
c1	1147601	1147705	Hcv1.av93.c1.g168.i1
c1	1147801	1147897	Hcv1.av93.c1.g168.i1
c1	1148021	1148449	Hcv1.av93.c1.g168.i1
c1	1148950	1149380	Hcv1.av93.c1.g168.i1
c1	1149540	1149689	Hcv1.av93.c1.g168.i1
c1	1149818	1149931	Hcv1.av93.c1.g168.i1
c1	1150056	1150208	Hcv1.av93.c1.g168.i1
c1	1150300	1150450	Hcv1.av93.c1.g168.i1
c1	1150594	1150830	Hcv1.av93.c1.g168.i1
c1	1150941	1151677	Hcv1.av93.c1.g169.i2
c1	1150941	1153454	Hcv1.av93.c1.g169.i1
c1	1152941	1153454	Hcv1.av93.c1.g169.i2
c1	1153601	1153694	Hcv1.av93.c1.g169.i1
c1	1153601	1153694	Hcv1.av93.c1.g169.i2
c1	1153792	1153924	Hcv1.av93.c1.g169.i2
c1	1153792	1153924	Hcv1.av93.c1.g169.i1
c1	1154070	1154248	Hcv1.av93.c1.g169.i1
c1	1154070	1154248	Hcv1.av93.c1.g169.i2
c1	1154787	1155010	Hcv1.av93.c1.g169.i1
c1	1154787	1155010	Hcv1.av93.c1.g169.i2
c1	1155166	1155253	Hcv1.av93.c1.g169.i2
c1	1155166	1155253	Hcv1.av93.c1.g169.i1
c1	1155496	1155695	Hcv1.av93.c1.g169.i2
c1	1155496	1155695	Hcv1.av93.c1.g169.i1
c1	1155832	1156104	Hcv1.av93.c1.g169.i1
c1	1155832	1156104	Hcv1.av93.c1.g169.i2
c1	1156271	1156494	Hcv1.av93.c1.g169.i2
c1	1156271	1156494	Hcv1.av93.c1.g169.i1
c1	1156631	1156770	Hcv1.av93.c1.g169.i2
c1	1156631	1156770	Hcv1.av93.c1.g169.i1
c1	1156870	1157050	Hcv1.av93.c1.g169.i1
c1	1156870	1157050	Hcv1.av93.c1.g169.i2
c1	1157169	1158195	Hcv1.av93.c1.g169.i2
c1	1157169	1158195	Hcv1.av93.c1.g169.i1
c1	1159658	1160878	Hcv1.av93.c1.g171.i1
c1	1160620	1160917	Hcv1.av93.c1.g171.i2
c1	1161787	1162714	Hcv1.av93.c1.g172.i1
c1	1171604	1172030	Hcv1.av93.c1.g174.i1
c1	1173216	1174688	Hcv1.av93.c1.g175.i1
c1	1174828	1174891	Hcv1.av93.c1.g175.i1
c1	1175882	1177355	Hcv1.av93.c1.g176.i1
c1	1177473	1178321	Hcv1.av93.c1.g176.i1
c1	1183214	1183273	Hcv1.av93.c1.g177.i1
c1	1183411	1183576	Hcv1.av93.c1.g177.i1
c1	1183767	1183971	Hcv1.av93.c1.g177.i1
c1	1184067	1184354	Hcv1.av93.c1.g177.i1
c1	1184831	1184989	Hcv1.av93.c1.g177.i1
c1	1185154	1185286	Hcv1.av93.c1.g177.i1
c1	1185444	1185624	Hcv1.av93.c1.g177.i1
c1	1186565	1186847	Hcv1.av93.c1.g177.i1
c1	1189243	1189426	Hcv1.av93.c1.g179.i1
c1	1189513	1189637	Hcv1.av93.c1.g179.i1
c1	1189723	1189818	Hcv1.av93.c1.g179.i1
c1	1189905	1190033	Hcv1.av93.c1.g179.i1
c1	1190135	1190245	Hcv1.av93.c1.g179.i1
c1	1190353	1190505	Hcv1.av93.c1.g179.i1
c1	1190627	1190762	Hcv1.av93.c1.g179.i1
c1	1190841	1191073	Hcv1.av93.c1.g179.i1
c1	1191496	1191682	Hcv1.av93.c1.g179.i1
c1	1191857	1192255	Hcv1.av93.c1.g179.i1
c1	1193224	1193477	Hcv1.av93.c1.g180.i1
c1	1193706	1193830	Hcv1.av93.c1.g180.i1
c1	1193922	1194146	Hcv1.av93.c1.g180.i1
c1	1194249	1194359	Hcv1.av93.c1.g180.i1
c1	1194434	1194583	Hcv1.av93.c1.g180.i1
c1	1194662	1194797	Hcv1.av93.c1.g180.i1
c1	1194946	1195179	Hcv1.av93.c1.g180.i1
c1	1195253	1195439	Hcv1.av93.c1.g180.i1
c1	1195497	1195865	Hcv1.av93.c1.g180.i1
c1	1198953	1200860	Hcv1.av93.c1.g181.i1
c1	1216133	1216255	Hcv1.av93.c1.g182.i1
c1	1216566	1216627	Hcv1.av93.c1.g182.i1
c1	1216754	1216843	Hcv1.av93.c1.g182.i1
c1	1216951	1217028	Hcv1.av93.c1.g182.i1
c1	1217141	1217307	Hcv1.av93.c1.g182.i1
c1	1217750	1217852	Hcv1.av93.c1.g182.i1
c1	1217991	1218157	Hcv1.av93.c1.g182.i1
c1	1218257	1218367	Hcv1.av93.c1.g182.i1
c1	1218506	1218633	Hcv1.av93.c1.g182.i1
c1	1218658	1218709	Hcv1.av93.c1.g183.i1;SII=y
c1	1221305	1222407	Hcv1.av93.c1.g183.i1;SII=y
c1	1221368	1221489	Hcv1.av93.c1.g182.i1
c1	1221920	1221970	Hcv1.av93.c1.g182.i1
c1	1222816	1222975	Hcv1.av93.c1.g182.i1
c1	1223086	1223171	Hcv1.av93.c1.g182.i1
c1	1223261	1223754	Hcv1.av93.c1.g182.i1
c1	1223896	1224000	Hcv1.av93.c1.g182.i1
c1	1225051	1225211	Hcv1.av93.c1.g182.i1
c1	1225314	1225434	Hcv1.av93.c1.g182.i1
c1	1225615	1225704	Hcv1.av93.c1.g182.i1
c1	1225887	1226089	Hcv1.av93.c1.g182.i1
c1	1226243	1226369	Hcv1.av93.c1.g182.i1
c1	1226502	1226915	Hcv1.av93.c1.g182.i1
c1	1227163	1227369	Hcv1.av93.c1.g182.i1
c1	1227492	1227656	Hcv1.av93.c1.g182.i1
c1	1228752	1228898	Hcv1.av93.c1.g182.i1
c1	1229568	1229651	Hcv1.av93.c1.g182.i1
c1	1229808	1229971	Hcv1.av93.c1.g182.i1
c1	1235697	1242357	Hcv1.av93.c1.g184.i1
c1	1251616	1251625	Hcv1.av93.c1.g185.i1
c1	1253189	1257878	Hcv1.av93.c1.g185.i1
c1	1260073	1260149	Hcv1.av93.c1.g186.i1
c1	1264479	1265919	Hcv1.av93.c1.g186.i1
c1	1267078	1267228	Hcv1.av93.c1.g182.i1
c1	1267406	1267462	Hcv1.av93.c1.g182.i1
c1	1267758	1267895	Hcv1.av93.c1.g182.i1
c1	1269403	1269573	Hcv1.av93.c1.g182.i1
c1	1269694	1269846	Hcv1.av93.c1.g182.i1
c1	1269952	1270638	Hcv1.av93.c1.g182.i1
c1	1270768	1270951	Hcv1.av93.c1.g182.i1
c1	1271054	1271495	Hcv1.av93.c1.g182.i1
c1	1271595	1271766	Hcv1.av93.c1.g182.i1
c1	1271883	1272367	Hcv1.av93.c1.g182.i1
c1	1273545	1273809	Hcv1.av93.c1.g182.i1
c1	1273986	1274192	Hcv1.av93.c1.g182.i1
c1	1274334	1275293	Hcv1.av93.c1.g182.i1
c1	1275377	1275527	Hcv1.av93.c1.g182.i1
c1	1280559	1280910	Hcv1.av93.c1.g187.i2;SII=y
c1	1280559	1282740	Hcv1.av93.c1.g187.i3;SII=y
c1	1280559	1285578	Hcv1.av93.c1.g187.i1;SII=y
c1	1281418	1282740	Hcv1.av93.c1.g187.i2;SII=y
c1	1282835	1283169	Hcv1.av93.c1.g187.i2;SII=y
c1	1282835	1283169	Hcv1.av93.c1.g187.i3;SII=y
c1	1283264	1285578	Hcv1.av93.c1.g187.i3;SII=y
c1	1283264	1285578	Hcv1.av93.c1.g187.i2;SII=y
c1	1285681	1286071	Hcv1.av93.c1.g187.i1;SII=y
c1	1285681	1286071	Hcv1.av93.c1.g187.i2;SII=y
c1	1285681	1286071	Hcv1.av93.c1.g187.i3;SII=y
c1	1288981	1289156	Hcv1.av93.c1.g182.i1
c1	1289298	1289737	Hcv1.av93.c1.g182.i1
c1	1289878	1290048	Hcv1.av93.c1.g182.i1
c1	1290345	1290540	Hcv1.av93.c1.g182.i1
c1	1290637	1290749	Hcv1.av93.c1.g182.i1
c1	1291428	1291544	Hcv1.av93.c1.g182.i1
c1	1292729	1292878	Hcv1.av93.c1.g182.i1
c1	1293522	1293563	Hcv1.av93.c1.g182.i1
c1	1294358	1294457	Hcv1.av93.c1.g182.i1
c1	1294628	1295345	Hcv1.av93.c1.g182.i1
c1	1295466	1295929	Hcv1.av93.c1.g182.i1
c1	1297067	1297330	Hcv1.av93.c1.g188.i1
c1	1297657	1297836	Hcv1.av93.c1.g188.i1
c1	1298312	1298490	Hcv1.av93.c1.g188.i1
c1	1298608	1298683	Hcv1.av93.c1.g188.i1
c1	1298836	1298998	Hcv1.av93.c1.g188.i1
c1	1299106	1299326	Hcv1.av93.c1.g188.i1
c1	1299433	1299546	Hcv1.av93.c1.g188.i1
c1	1299960	1300380	Hcv1.av93.c1.g188.i1
c1	1305226	1305367	Hcv1.av93.c1.g189.i1
c1	1305466	1305697	Hcv1.av93.c1.g189.i1
c1	1305863	1306158	Hcv1.av93.c1.g189.i1
c1	1306265	1306421	Hcv1.av93.c1.g189.i1
c1	1306502	1306894	Hcv1.av93.c1.g189.i1
c1	1309061	1309202	Hcv1.av93.c1.g190.i1
c1	1309358	1309589	Hcv1.av93.c1.g190.i1
c1	1309715	1310007	Hcv1.av93.c1.g190.i1
c1	1310143	1310305	Hcv1.av93.c1.g190.i1
c1	1310478	1310818	Hcv1.av93.c1.g190.i1
c1	1312801	1312917	Hcv1.av93.c1.g165.i1
c1	1312999	1313241	Hcv1.av93.c1.g165.i1
c1	1314168	1314636	Hcv1.av93.c1.g191.i1
c1	1314487	1314636	Hcv1.av93.c1.g192.i1
c1	1314741	1314862	Hcv1.av93.c1.g191.i1
c1	1314741	1314862	Hcv1.av93.c1.g192.i1
c1	1315068	1315239	Hcv1.av93.c1.g192.i1
c1	1315068	1315239	Hcv1.av93.c1.g191.i1
c1	1316610	1316936	Hcv1.av93.c1.g191.i1
c1	1316610	1316936	Hcv1.av93.c1.g192.i1
c1	1317044	1317206	Hcv1.av93.c1.g191.i1
c1	1317044	1317206	Hcv1.av93.c1.g192.i1
c1	1318025	1318125	Hcv1.av93.c1.g192.i1
c1	1318025	1318125	Hcv1.av93.c1.g191.i1
c1	1318386	1319325	Hcv1.av93.c1.g191.i1
c1	1318386	1319326	Hcv1.av93.c1.g192.i1
c1	1320270	1320341	Hcv1.av93.c1.g193.i1
c1	1321012	1321163	Hcv1.av93.c1.g193.i1
c1	1321347	1321492	Hcv1.av93.c1.g193.i1
c1	1321690	1321712	Hcv1.av93.c1.g193.i1
c1	1322019	1322903	Hcv1.av93.c1.g194.i1
c1	1323036	1323217	Hcv1.av93.c1.g193.i1
c1	1330440	1330888	Hcv1.av93.c1.g195.i2
c1	1330440	1330888	Hcv1.av93.c1.g195.i4
c1	1330440	1330888	Hcv1.av93.c1.g195.i3
c1	1330440	1330888	Hcv1.av93.c1.g195.i1
c1	1330994	1331133	Hcv1.av93.c1.g195.i2
c1	1330994	1331133	Hcv1.av93.c1.g195.i4
c1	1330994	1331133	Hcv1.av93.c1.g195.i1
c1	1330994	1331133	Hcv1.av93.c1.g195.i3
c1	1331329	1331469	Hcv1.av93.c1.g195.i4
c1	1331329	1331469	Hcv1.av93.c1.g195.i2
c1	1331329	1331469	Hcv1.av93.c1.g195.i1
c1	1331329	1331469	Hcv1.av93.c1.g195.i3
c1	1331597	1331692	Hcv1.av93.c1.g195.i1
c1	1331597	1331692	Hcv1.av93.c1.g195.i4
c1	1331597	1332034	Hcv1.av93.c1.g195.i2
c1	1331597	1332034	Hcv1.av93.c1.g195.i3
c1	1331896	1332034	Hcv1.av93.c1.g195.i1
c1	1331896	1334590	Hcv1.av93.c1.g195.i4
c1	1332215	1334590	Hcv1.av93.c1.g195.i3
c1	1332215	1332710	Hcv1.av93.c1.g195.i2
c1	1332215	1332710	Hcv1.av93.c1.g195.i1
c1	1332813	1332880	Hcv1.av93.c1.g195.i2
c1	1332813	1332880	Hcv1.av93.c1.g195.i1
c1	1333111	1334590	Hcv1.av93.c1.g195.i2
c1	1333111	1334590	Hcv1.av93.c1.g195.i1
c1	1340013	1341146	Hcv1.av93.c1.g196.i2
c1	1340013	1341146	Hcv1.av93.c1.g196.i1
c1	1341632	1341691	Hcv1.av93.c1.g196.i1
c1	1341632	1341691	Hcv1.av93.c1.g196.i2
c1	1343419	1343679	Hcv1.av93.c1.g197.i1
c1	1343898	1343976	Hcv1.av93.c1.g197.i1
c1	1344065	1344502	Hcv1.av93.c1.g198.i1
c1	1346745	1346827	Hcv1.av93.c1.g196.i1
c1	1346745	1346827	Hcv1.av93.c1.g196.i2
c1	1348548	1348691	Hcv1.av93.c1.g196.i1
c1	1348548	1348691	Hcv1.av93.c1.g196.i2
c1	1348774	1348817	Hcv1.av93.c1.g196.i2
c1	1348774	1348817	Hcv1.av93.c1.g196.i1
c1	1349035	1349058	Hcv1.av93.c1.g196.i2
c1	1349184	1349216	Hcv1.av93.c1.g196.i2
c1	1349184	1349216	Hcv1.av93.c1.g196.i1
c1	1349657	1349849	Hcv1.av93.c1.g196.i3
c1	1350955	1351467	Hcv1.av93.c1.g196.i3
c1	1354550	1354681	Hcv1.av93.c1.g196.i3
c1	1354550	1354681	Hcv1.av93.c1.g196.i1
c1	1354550	1354681	Hcv1.av93.c1.g196.i2
c1	1354946	1355092	Hcv1.av93.c1.g196.i2
c1	1354946	1355092	Hcv1.av93.c1.g196.i1
c1	1354946	1355092	Hcv1.av93.c1.g196.i3
c1	1355194	1355409	Hcv1.av93.c1.g196.i3
c1	1355194	1355409	Hcv1.av93.c1.g196.i1
c1	1355194	1355409	Hcv1.av93.c1.g196.i2
c1	1361452	1361527	Hcv1.av93.c1.g196.i3
c1	1361452	1361527	Hcv1.av93.c1.g196.i1
c1	1361452	1361527	Hcv1.av93.c1.g196.i2
c1	1361657	1361882	Hcv1.av93.c1.g196.i1
c1	1361657	1361882	Hcv1.av93.c1.g196.i3
c1	1361657	1361882	Hcv1.av93.c1.g196.i2
c1	1361981	1362120	Hcv1.av93.c1.g196.i1
c1	1361981	1362120	Hcv1.av93.c1.g196.i2
c1	1361981	1362120	Hcv1.av93.c1.g196.i3
c1	1363957	1364382	Hcv1.av93.c1.g199.i1
c1	1365071	1365121	Hcv1.av93.c1.g200.i1
c1	1365438	1365525	Hcv1.av93.c1.g200.i1
c1	1365661	1365764	Hcv1.av93.c1.g200.i1
c1	1365925	1366041	Hcv1.av93.c1.g200.i1
c1	1366147	1366231	Hcv1.av93.c1.g200.i1
c1	1366335	1366420	Hcv1.av93.c1.g200.i1
c1	1366780	1366848	Hcv1.av93.c1.g200.i1
c1	1366978	1367082	Hcv1.av93.c1.g200.i1
c1	1367252	1367339	Hcv1.av93.c1.g200.i1
c1	1367488	1367600	Hcv1.av93.c1.g200.i1
c1	1368223	1368531	Hcv1.av93.c1.g200.i1
c1	1368277	1368696	Hcv1.av93.c1.g201.i1
c1	1368672	1368696	Hcv1.av93.c1.g202.i1
c1	1368791	1368860	Hcv1.av93.c1.g201.i1
c1	1368791	1368860	Hcv1.av93.c1.g202.i1
c1	1369009	1369071	Hcv1.av93.c1.g201.i1
c1	1369009	1369071	Hcv1.av93.c1.g202.i1
c1	1370164	1370309	Hcv1.av93.c1.g201.i1
c1	1370164	1370309	Hcv1.av93.c1.g202.i1
c1	1370521	1370662	Hcv1.av93.c1.g201.i1
c1	1370521	1370662	Hcv1.av93.c1.g202.i1
c1	1370755	1370873	Hcv1.av93.c1.g202.i1
c1	1370755	1371055	Hcv1.av93.c1.g201.i1
c1	1370968	1375152	Hcv1.av93.c1.g202.i1
c1	1377853	1382705	Hcv1.av93.c1.g203.i1
c1	1382710	1386002	Hcv1.av93.c1.g204.i1
c1	1387604	1391000	Hcv1.av93.c1.g205.i1
c1	1391482	1391655	Hcv1.av93.c1.g206.i1
c1	1391981	1392182	Hcv1.av93.c1.g206.i1
c1	1393493	1393680	Hcv1.av93.c1.g206.i1
c1	1398564	1398734	Hcv1.av93.c1.g206.i1
c1	1399020	1399102	Hcv1.av93.c1.g206.i1
c1	1399241	1399347	Hcv1.av93.c1.g206.i1
c1	1400661	1401878	Hcv1.av93.c1.g206.i1
c1	1401650	1401938	Hcv1.av93.c1.g207.i1
c1	1401651	1401938	Hcv1.av93.c1.g207.i3
c1	1401651	1401938	Hcv1.av93.c1.g207.i2
c1	1402237	1402325	Hcv1.av93.c1.g207.i1
c1	1402237	1402325	Hcv1.av93.c1.g207.i3
c1	1402237	1402879	Hcv1.av93.c1.g207.i2
c1	1402796	1402879	Hcv1.av93.c1.g207.i1
c1	1403268	1403389	Hcv1.av93.c1.g207.i1
c1	1403268	1403389	Hcv1.av93.c1.g207.i3
c1	1403268	1403389	Hcv1.av93.c1.g207.i2
c1	1403727	1403874	Hcv1.av93.c1.g207.i2
c1	1403727	1403874	Hcv1.av93.c1.g207.i3
c1	1403727	1403874	Hcv1.av93.c1.g207.i1
c1	1404104	1404203	Hcv1.av93.c1.g207.i1
c1	1404104	1404203	Hcv1.av93.c1.g207.i2
c1	1404104	1404203	Hcv1.av93.c1.g207.i3
c1	1404311	1404400	Hcv1.av93.c1.g207.i2
c1	1404311	1404400	Hcv1.av93.c1.g207.i3
c1	1404311	1404400	Hcv1.av93.c1.g207.i1
c1	1405170	1410239	Hcv1.av93.c1.g208.i1
c1	1411511	1412366	Hcv1.av93.c1.g209.i1
c1	1412475	1412643	Hcv1.av93.c1.g209.i1
c1	1412799	1412938	Hcv1.av93.c1.g209.i1
c1	1413018	1413446	Hcv1.av93.c1.g209.i1
c1	1413493	1413642	Hcv1.av93.c1.g210.i1
c1	1414104	1414324	Hcv1.av93.c1.g210.i1
c1	1414549	1414695	Hcv1.av93.c1.g210.i1
c1	1415057	1416371	Hcv1.av93.c1.g210.i1
c1	1417497	1417681	Hcv1.av93.c1.g210.i1
c1	1417919	1418940	Hcv1.av93.c1.g210.i1
c1	1420632	1420836	Hcv1.av93.c1.g212.i1
c1	1420632	1420836	Hcv1.av93.c1.g212.i4
c1	1420632	1420836	Hcv1.av93.c1.g212.i2
c1	1420632	1420836	Hcv1.av93.c1.g212.i3
c1	1420935	1421393	Hcv1.av93.c1.g212.i3
c1	1420935	1421476	Hcv1.av93.c1.g212.i4
c1	1420935	1421961	Hcv1.av93.c1.g212.i2
c1	1420935	1421270	Hcv1.av93.c1.g212.i1
c1	1421564	1421961	Hcv1.av93.c1.g212.i3
c1	1421571	1421961	Hcv1.av93.c1.g212.i4
c1	1421779	1421961	Hcv1.av93.c1.g212.i1
c1	1422085	1422461	Hcv1.av93.c1.g213.i1
c1	1422085	1422461	Hcv1.av93.c1.g213.i3
c1	1422085	1422461	Hcv1.av93.c1.g213.i2
c1	1422621	1422889	Hcv1.av93.c1.g213.i3
c1	1422621	1422889	Hcv1.av93.c1.g213.i2
c1	1422621	1422889	Hcv1.av93.c1.g213.i1
c1	1422979	1423087	Hcv1.av93.c1.g213.i3
c1	1422979	1423087	Hcv1.av93.c1.g213.i1
c1	1422979	1423087	Hcv1.av93.c1.g213.i2
c1	1423231	1423473	Hcv1.av93.c1.g213.i3
c1	1423231	1423473	Hcv1.av93.c1.g213.i2
c1	1423231	1423473	Hcv1.av93.c1.g213.i1
c1	1423622	1423746	Hcv1.av93.c1.g213.i3
c1	1423622	1423746	Hcv1.av93.c1.g213.i2
c1	1423622	1423746	Hcv1.av93.c1.g213.i1
c1	1423825	1423956	Hcv1.av93.c1.g213.i1
c1	1423825	1423956	Hcv1.av93.c1.g213.i3
c1	1423825	1423956	Hcv1.av93.c1.g213.i2
c1	1424125	1424294	Hcv1.av93.c1.g213.i1
c1	1424125	1424294	Hcv1.av93.c1.g213.i3
c1	1424125	1424294	Hcv1.av93.c1.g213.i2
c1	1424394	1424683	Hcv1.av93.c1.g213.i3
c1	1424394	1424493	Hcv1.av93.c1.g213.i2
c1	1424394	1424493	Hcv1.av93.c1.g213.i1
c1	1424631	1424683	Hcv1.av93.c1.g213.i2
c1	1424631	1424683	Hcv1.av93.c1.g213.i1
c1	1425141	1425177	Hcv1.av93.c1.g213.i1
c1	1425141	1425177	Hcv1.av93.c1.g213.i3
c1	1425141	1425177	Hcv1.av93.c1.g213.i2
c1	1425384	1425506	Hcv1.av93.c1.g213.i3
c1	1425384	1425506	Hcv1.av93.c1.g213.i1
c1	1425384	1425506	Hcv1.av93.c1.g213.i2
c1	1429066	1429165	Hcv1.av93.c1.g213.i2
c1	1429066	1429405	Hcv1.av93.c1.g213.i3
c1	1429066	1429180	Hcv1.av93.c1.g213.i1
c1	1429314	1429405	Hcv1.av93.c1.g213.i2
c1	1429314	1429405	Hcv1.av93.c1.g213.i1
c1	1429492	1429594	Hcv1.av93.c1.g213.i2
c1	1429492	1429594	Hcv1.av93.c1.g213.i3
c1	1429492	1429594	Hcv1.av93.c1.g213.i1
c1	1429697	1430033	Hcv1.av93.c1.g213.i3
c1	1430095	1430151	Hcv1.av93.c1.g213.i2
c1	1430095	1430151	Hcv1.av93.c1.g213.i1
c1	1430417	1430544	Hcv1.av93.c1.g213.i2
c1	1430417	1430544	Hcv1.av93.c1.g213.i1
c1	1430669	1430929	Hcv1.av93.c1.g213.i1
c1	1430669	1430929	Hcv1.av93.c1.g213.i2
c1	1431042	1431224	Hcv1.av93.c1.g213.i2
c1	1431042	1431224	Hcv1.av93.c1.g213.i1
c1	1433701	1437988	Hcv1.av93.c1.g214.i1
c1	1433701	1437988	Hcv1.av93.c1.g214.i2
c1	1438109	1438348	Hcv1.av93.c1.g214.i1
c1	1438109	1438348	Hcv1.av93.c1.g214.i2
c1	1438703	1438825	Hcv1.av93.c1.g214.i1
c1	1438703	1438825	Hcv1.av93.c1.g214.i2
c1	1439052	1439183	Hcv1.av93.c1.g214.i2
c1	1439052	1439183	Hcv1.av93.c1.g214.i1
c1	1439479	1439661	Hcv1.av93.c1.g214.i2
c1	1439479	1439661	Hcv1.av93.c1.g214.i1
c1	1439807	1439986	Hcv1.av93.c1.g214.i2
c1	1439807	1439986	Hcv1.av93.c1.g214.i1
c1	1440153	1440336	Hcv1.av93.c1.g214.i1
c1	1440153	1440336	Hcv1.av93.c1.g214.i2
c1	1440434	1440585	Hcv1.av93.c1.g214.i1
c1	1440434	1440585	Hcv1.av93.c1.g214.i2
c1	1440716	1441119	Hcv1.av93.c1.g214.i1
c1	1440716	1441119	Hcv1.av93.c1.g214.i2
c1	1441203	1441552	Hcv1.av93.c1.g215.i1;SII=y
c1	1441756	1441833	Hcv1.av93.c1.g214.i1
c1	1441756	1441833	Hcv1.av93.c1.g214.i2
c1	1441921	1442055	Hcv1.av93.c1.g214.i1
c1	1441921	1442055	Hcv1.av93.c1.g214.i2
c1	1442161	1442394	Hcv1.av93.c1.g214.i1
c1	1442161	1442394	Hcv1.av93.c1.g214.i2
c1	1442512	1444493	Hcv1.av93.c1.g214.i2
c1	1442512	1445658	Hcv1.av93.c1.g214.i1
c1	1444566	1445658	Hcv1.av93.c1.g214.i2
c1	1448205	1449608	Hcv1.av93.c1.g216.i1
c1	1449827	1450036	Hcv1.av93.c1.g216.i1
c1	1450256	1450504	Hcv1.av93.c1.g216.i1
c1	1450641	1450830	Hcv1.av93.c1.g216.i1
c1	1450951	1451604	Hcv1.av93.c1.g216.i1
c1	1451860	1452000	Hcv1.av93.c1.g217.i1
c1	1451860	1452000	Hcv1.av93.c1.g217.i2
c1	1452173	1452218	Hcv1.av93.c1.g217.i1
c1	1452173	1452218	Hcv1.av93.c1.g217.i2
c1	1452395	1452457	Hcv1.av93.c1.g217.i1
c1	1452395	1452457	Hcv1.av93.c1.g217.i2
c1	1452628	1452681	Hcv1.av93.c1.g217.i1
c1	1452628	1452681	Hcv1.av93.c1.g217.i2
c1	1452852	1452914	Hcv1.av93.c1.g217.i1
c1	1452852	1452914	Hcv1.av93.c1.g217.i2
c1	1453081	1453138	Hcv1.av93.c1.g217.i1
c1	1453081	1453138	Hcv1.av93.c1.g217.i2
c1	1453306	1453373	Hcv1.av93.c1.g217.i1
c1	1453306	1453373	Hcv1.av93.c1.g217.i2
c1	1453543	1453591	Hcv1.av93.c1.g217.i2
c1	1453543	1453591	Hcv1.av93.c1.g217.i1
c1	1453768	1453812	Hcv1.av93.c1.g217.i1
c1	1453768	1453812	Hcv1.av93.c1.g217.i2
c1	1454196	1454259	Hcv1.av93.c1.g217.i1
c1	1454196	1454259	Hcv1.av93.c1.g217.i2
c1	1454467	1454523	Hcv1.av93.c1.g217.i1
c1	1454467	1454523	Hcv1.av93.c1.g217.i2
c1	1454719	1454788	Hcv1.av93.c1.g217.i1
c1	1454719	1454788	Hcv1.av93.c1.g217.i2
c1	1454962	1455017	Hcv1.av93.c1.g217.i2
c1	1454962	1455017	Hcv1.av93.c1.g217.i1
c1	1455239	1455297	Hcv1.av93.c1.g217.i2
c1	1455239	1455297	Hcv1.av93.c1.g217.i1
c1	1455479	1455529	Hcv1.av93.c1.g217.i2
c1	1455479	1455529	Hcv1.av93.c1.g217.i1
c1	1455705	1455797	Hcv1.av93.c1.g217.i2
c1	1455705	1455797	Hcv1.av93.c1.g217.i1
c1	1456032	1456101	Hcv1.av93.c1.g217.i2
c1	1456032	1456101	Hcv1.av93.c1.g217.i1
c1	1456336	1456400	Hcv1.av93.c1.g217.i1
c1	1456336	1456400	Hcv1.av93.c1.g217.i2
c1	1456624	1456669	Hcv1.av93.c1.g217.i2
c1	1456624	1456669	Hcv1.av93.c1.g217.i1
c1	1456844	1456909	Hcv1.av93.c1.g217.i2
c1	1456844	1456909	Hcv1.av93.c1.g217.i1
c1	1457081	1457159	Hcv1.av93.c1.g217.i2
c1	1457081	1457159	Hcv1.av93.c1.g217.i1
c1	1457326	1457368	Hcv1.av93.c1.g217.i2
c1	1457326	1457368	Hcv1.av93.c1.g217.i1
c1	1457535	1457580	Hcv1.av93.c1.g217.i1
c1	1457822	1458175	Hcv1.av93.c1.g217.i2
c1	1457822	1458175	Hcv1.av93.c1.g217.i1
c1	1458304	1458411	Hcv1.av93.c1.g217.i2
c1	1458304	1458411	Hcv1.av93.c1.g217.i1
c1	1458592	1458801	Hcv1.av93.c1.g217.i1
c1	1458592	1458801	Hcv1.av93.c1.g217.i2
c1	1458927	1459071	Hcv1.av93.c1.g217.i1
c1	1458927	1459071	Hcv1.av93.c1.g217.i2
c1	1459161	1459286	Hcv1.av93.c1.g217.i2
c1	1459161	1459286	Hcv1.av93.c1.g217.i1
c1	1459385	1459881	Hcv1.av93.c1.g217.i2
c1	1459385	1459881	Hcv1.av93.c1.g217.i1
c1	1459996	1460159	Hcv1.av93.c1.g217.i2
c1	1459996	1460159	Hcv1.av93.c1.g217.i1
c1	1461428	1461916	Hcv1.av93.c1.g218.i1
c1	1461428	1461916	Hcv1.av93.c1.g218.i2
c1	1462033	1462121	Hcv1.av93.c1.g218.i1
c1	1462033	1462121	Hcv1.av93.c1.g218.i2
c1	1462265	1462385	Hcv1.av93.c1.g218.i1
c1	1462265	1462385	Hcv1.av93.c1.g218.i2
c1	1462537	1462818	Hcv1.av93.c1.g218.i1
c1	1462537	1462818	Hcv1.av93.c1.g218.i2
c1	1462898	1463119	Hcv1.av93.c1.g218.i1
c1	1462898	1463272	Hcv1.av93.c1.g218.i2
c1	1463198	1463272	Hcv1.av93.c1.g218.i1
c1	1463727	1463831	Hcv1.av93.c1.g218.i2
c1	1463727	1463831	Hcv1.av93.c1.g218.i1
c1	1464531	1464628	Hcv1.av93.c1.g218.i2
c1	1464531	1464628	Hcv1.av93.c1.g218.i1
c1	1465722	1465933	Hcv1.av93.c1.g219.i1;SII=y
c1	1466083	1466162	Hcv1.av93.c1.g219.i1;SII=y
c1	1466591	1466766	Hcv1.av93.c1.g219.i1;SII=y
c1	1467005	1467109	Hcv1.av93.c1.g219.i1;SII=y
c1	1468757	1468886	Hcv1.av93.c1.g219.i1;SII=y
c1	1469539	1469831	Hcv1.av93.c1.g219.i1;SII=y
c1	1471582	1471773	Hcv1.av93.c1.g219.i1;SII=y
c1	1472707	1472804	Hcv1.av93.c1.g219.i1;SII=y
c1	1474171	1474321	Hcv1.av93.c1.g219.i1;SII=y
c1	1474497	1474781	Hcv1.av93.c1.g219.i1;SII=y
c1	1475042	1475193	Hcv1.av93.c1.g219.i1;SII=y
c1	1475406	1475549	Hcv1.av93.c1.g219.i1;SII=y
c1	1476462	1478146	Hcv1.av93.c1.g219.i1;SII=y
c1	1478358	1478458	Hcv1.av93.c1.g218.i2
c1	1478358	1478458	Hcv1.av93.c1.g218.i1
c1	1478691	1478789	Hcv1.av93.c1.g218.i2
c1	1478691	1478789	Hcv1.av93.c1.g218.i1
c1	1480192	1480885	Hcv1.av93.c1.g220.i1
c1	1481158	1481307	Hcv1.av93.c1.g220.i1
c1	1482114	1484287	Hcv1.av93.c1.g221.i1
c1	1484441	1485285	Hcv1.av93.c1.g222.i1
c1	1484441	1485285	Hcv1.av93.c1.g222.i2
c1	1485528	1485638	Hcv1.av93.c1.g222.i2
c1	1485528	1485638	Hcv1.av93.c1.g222.i1
c1	1485760	1485945	Hcv1.av93.c1.g222.i1
c1	1485760	1485945	Hcv1.av93.c1.g222.i2
c1	1488537	1488854	Hcv1.av93.c1.g222.i1
c1	1488537	1488854	Hcv1.av93.c1.g222.i2
c1	1489019	1489141	Hcv1.av93.c1.g222.i1
c1	1489019	1489141	Hcv1.av93.c1.g222.i2
c1	1489369	1489569	Hcv1.av93.c1.g222.i1
c1	1489369	1489569	Hcv1.av93.c1.g222.i2
c1	1489710	1489793	Hcv1.av93.c1.g222.i1
c1	1489710	1489793	Hcv1.av93.c1.g222.i2
c1	1489967	1489988	Hcv1.av93.c1.g222.i2
c1	1490270	1491529	Hcv1.av93.c1.g222.i1
c1	1490270	1491529	Hcv1.av93.c1.g222.i2
c1	1492283	1492396	Hcv1.av93.c1.g223.i1
c1	1492283	1492396	Hcv1.av93.c1.g223.i2
c1	1492716	1492883	Hcv1.av93.c1.g223.i1
[truncated: 152,206 more rows]

## Sheet: HormiphoraOnlyTranscripts
# these are transcripts that have no blastp hits in Mnemiopsis or Pleurobrachia
Hcv1.av93.c10.g102.i1
Hcv1.av93.c10.g102.i2
Hcv1.av93.c10.g102.i3
Hcv1.av93.c10.g109.i1
Hcv1.av93.c10.g109.i2
Hcv1.av93.c10.g109.i3
Hcv1.av93.c10.g110.i1
Hcv1.av93.c10.g120.i1
Hcv1.av93.c10.g120.i2
Hcv1.av93.c10.g120.i4
Hcv1.av93.c10.g131.i1
Hcv1.av93.c10.g137.i1
Hcv1.av93.c10.g145.i1
Hcv1.av93.c10.g145.i2
Hcv1.av93.c10.g148.i1
Hcv1.av93.c10.g150.i1
Hcv1.av93.c10.g180.i1
Hcv1.av93.c10.g206.i1
Hcv1.av93.c10.g216.i1
Hcv1.av93.c10.g218.i1
Hcv1.av93.c10.g228.i1
Hcv1.av93.c10.g228.i2
Hcv1.av93.c10.g241.i1
Hcv1.av93.c10.g251.i1
Hcv1.av93.c10.g252.i1
Hcv1.av93.c10.g252.i2
Hcv1.av93.c10.g252.i3
Hcv1.av93.c10.g28.i1
Hcv1.av93.c10.g301.i1
Hcv1.av93.c10.g334.i1
Hcv1.av93.c10.g334.i2
Hcv1.av93.c10.g334.i3
Hcv1.av93.c10.g361.i1
Hcv1.av93.c10.g361.i2
Hcv1.av93.c10.g361.i4
Hcv1.av93.c10.g391.i1
Hcv1.av93.c10.g414.i1
Hcv1.av93.c10.g420.i1
Hcv1.av93.c10.g429.i1
Hcv1.av93.c10.g430.i1
Hcv1.av93.c10.g430.i2
Hcv1.av93.c10.g453.i1
Hcv1.av93.c10.g453.i2
Hcv1.av93.c10.g461.i1
Hcv1.av93.c10.g462.i1
Hcv1.av93.c10.g484.i1
Hcv1.av93.c10.g491.i1
Hcv1.av93.c10.g491.i2
Hcv1.av93.c10.g495.i1
Hcv1.av93.c10.g515.i1
Hcv1.av93.c10.g527.i1
Hcv1.av93.c10.g533.i1
Hcv1.av93.c10.g556.i1
Hcv1.av93.c10.g557.i1
Hcv1.av93.c10.g558.i1
Hcv1.av93.c10.g576.i1
Hcv1.av93.c10.g650.i1
Hcv1.av93.c10.g679.i1
Hcv1.av93.c10.g679.i2
Hcv1.av93.c10.g690.i1
Hcv1.av93.c10.g694.i1
Hcv1.av93.c10.g698.i1
Hcv1.av93.c10.g715.i1
Hcv1.av93.c10.g724.i1
Hcv1.av93.c10.g743.i1
Hcv1.av93.c10.g743.i2
Hcv1.av93.c10.g743.i4
Hcv1.av93.c10.g758.i1
Hcv1.av93.c10.g758.i2
Hcv1.av93.c10.g94.i1
Hcv1.av93.c11.g1052.i1
Hcv1.av93.c11.g1057.i1
Hcv1.av93.c11.g235.i1
Hcv1.av93.c11.g246.i1
Hcv1.av93.c11.g252.i1
Hcv1.av93.c11.g252.i2
Hcv1.av93.c11.g29.i1
Hcv1.av93.c11.g2.i1
Hcv1.av93.c11.g30.i1
Hcv1.av93.c11.g328.i1
Hcv1.av93.c11.g328.i2
Hcv1.av93.c11.g338.i1
Hcv1.av93.c11.g358.i1
Hcv1.av93.c11.g378.i1
Hcv1.av93.c11.g378.i2
Hcv1.av93.c11.g388.i1
Hcv1.av93.c11.g396.i1
Hcv1.av93.c11.g422.i1
Hcv1.av93.c11.g465.i1
Hcv1.av93.c11.g486.i1
Hcv1.av93.c11.g505.i2
Hcv1.av93.c11.g512.i1
Hcv1.av93.c11.g538.i1
Hcv1.av93.c11.g546.i1
Hcv1.av93.c11.g549.i1
Hcv1.av93.c11.g549.i2
Hcv1.av93.c11.g549.i3
Hcv1.av93.c11.g549.i4
Hcv1.av93.c11.g585.i1
Hcv1.av93.c11.g639.i1
Hcv1.av93.c11.g640.i1
Hcv1.av93.c11.g692.i1
Hcv1.av93.c11.g697.i1
Hcv1.av93.c11.g701.i14
Hcv1.av93.c11.g701.i15
Hcv1.av93.c11.g701.i18
Hcv1.av93.c11.g701.i3
Hcv1.av93.c11.g701.i5
Hcv1.av93.c11.g701.i6
Hcv1.av93.c11.g715.i1
Hcv1.av93.c11.g715.i2
Hcv1.av93.c11.g780.i1
Hcv1.av93.c11.g79.i1
Hcv1.av93.c11.g7.i1
Hcv1.av93.c11.g818.i1
Hcv1.av93.c11.g855.i1
Hcv1.av93.c11.g85.i1
Hcv1.av93.c11.g861.i1
Hcv1.av93.c11.g86.i1
Hcv1.av93.c11.g873.i1
Hcv1.av93.c11.g874.i1
Hcv1.av93.c11.g893.i1
Hcv1.av93.c11.g89.i1
Hcv1.av93.c11.g904.i1
Hcv1.av93.c11.g916.i1
Hcv1.av93.c11.g91.i1
Hcv1.av93.c11.g935.i1
Hcv1.av93.c11.g954.i1
Hcv1.av93.c11.g957.i1
Hcv1.av93.c12.g102.i1
Hcv1.av93.c12.g148.i1
Hcv1.av93.c12.g177.i1
Hcv1.av93.c12.g177.i10
Hcv1.av93.c12.g177.i11
Hcv1.av93.c12.g177.i3
Hcv1.av93.c12.g177.i4
Hcv1.av93.c12.g177.i5
Hcv1.av93.c12.g177.i6
Hcv1.av93.c12.g177.i7
Hcv1.av93.c12.g177.i8
Hcv1.av93.c12.g177.i9
Hcv1.av93.c12.g190.i1
Hcv1.av93.c12.g200.i1
Hcv1.av93.c12.g200.i2
Hcv1.av93.c12.g202.i1
Hcv1.av93.c12.g205.i1
Hcv1.av93.c12.g217.i1
Hcv1.av93.c12.g224.i1
Hcv1.av93.c12.g27.i1
Hcv1.av93.c12.g282.i1
Hcv1.av93.c12.g286.i1
Hcv1.av93.c12.g304.i1
Hcv1.av93.c12.g327.i1
Hcv1.av93.c12.g334.i1
Hcv1.av93.c12.g341.i1
Hcv1.av93.c12.g346.i1
Hcv1.av93.c12.g396.i1
Hcv1.av93.c12.g402.i1
Hcv1.av93.c12.g403.i1
Hcv1.av93.c12.g404.i1
Hcv1.av93.c12.g404.i2
Hcv1.av93.c12.g436.i1
Hcv1.av93.c12.g450.i1
Hcv1.av93.c12.g450.i2
Hcv1.av93.c12.g450.i3
Hcv1.av93.c12.g450.i4
Hcv1.av93.c12.g450.i5
Hcv1.av93.c12.g479.i1
Hcv1.av93.c12.g494.i1
Hcv1.av93.c12.g507.i1
Hcv1.av93.c12.g509.i1
Hcv1.av93.c12.g511.i1
Hcv1.av93.c12.g526.i2
Hcv1.av93.c12.g53.i1
Hcv1.av93.c12.g545.i1
Hcv1.av93.c12.g553.i1
Hcv1.av93.c12.g58.i1
Hcv1.av93.c12.g60.i1
Hcv1.av93.c12.g68.i1
Hcv1.av93.c12.g72.i1
Hcv1.av93.c13.g100.i1
Hcv1.av93.c13.g100.i2
Hcv1.av93.c13.g106.i1
Hcv1.av93.c13.g112.i1
Hcv1.av93.c13.g116.i1
Hcv1.av93.c13.g145.i1
Hcv1.av93.c13.g168.i1
Hcv1.av93.c13.g178.i1
Hcv1.av93.c13.g178.i2
Hcv1.av93.c13.g190.i1
Hcv1.av93.c13.g191.i1
Hcv1.av93.c13.g196.i1
Hcv1.av93.c13.g200.i1
Hcv1.av93.c13.g202.i1
Hcv1.av93.c13.g221.i1
Hcv1.av93.c13.g226.i1
Hcv1.av93.c13.g227.i1
Hcv1.av93.c13.g257.i1
Hcv1.av93.c13.g264.i1
Hcv1.av93.c13.g300.i1
Hcv1.av93.c13.g302.i1
Hcv1.av93.c13.g310.i1
Hcv1.av93.c13.g329.i1
Hcv1.av93.c13.g32.i1
Hcv1.av93.c13.g34.i1
Hcv1.av93.c13.g365.i1
Hcv1.av93.c13.g368.i1
Hcv1.av93.c13.g379.i1
Hcv1.av93.c13.g386.i1
Hcv1.av93.c13.g386.i2
Hcv1.av93.c13.g414.i1
Hcv1.av93.c13.g427.i1
Hcv1.av93.c13.g44.i1
Hcv1.av93.c13.g44.i2
Hcv1.av93.c13.g476.i1
Hcv1.av93.c13.g478.i1
Hcv1.av93.c13.g500.i1
Hcv1.av93.c13.g510.i1
Hcv1.av93.c13.g512.i1
Hcv1.av93.c13.g512.i2
Hcv1.av93.c13.g519.i1
Hcv1.av93.c13.g530.i1
Hcv1.av93.c13.g534.i1
Hcv1.av93.c13.g538.i1
Hcv1.av93.c13.g541.i1
Hcv1.av93.c13.g541.i2
Hcv1.av93.c13.g541.i3
Hcv1.av93.c13.g541.i4
Hcv1.av93.c13.g541.i5
Hcv1.av93.c13.g575.i1
Hcv1.av93.c13.g575.i2
Hcv1.av93.c13.g575.i3
Hcv1.av93.c13.g575.i4
Hcv1.av93.c13.g578.i1
Hcv1.av93.c13.g57.i1
Hcv1.av93.c13.g674.i1
Hcv1.av93.c13.g680.i1
Hcv1.av93.c13.g680.i2
Hcv1.av93.c13.g70.i1
Hcv1.av93.c13.g84.i1
Hcv1.av93.c13.g90.i1
Hcv1.av93.c1.g1009.i1
Hcv1.av93.c1.g1014.i1
Hcv1.av93.c1.g1085.i1
Hcv1.av93.c1.g1109.i1
Hcv1.av93.c1.g1112.i1
Hcv1.av93.c1.g1112.i2
Hcv1.av93.c1.g1113.i1
Hcv1.av93.c1.g1165.i1
Hcv1.av93.c1.g1165.i2
Hcv1.av93.c1.g1189.i1
Hcv1.av93.c1.g1311.i1
Hcv1.av93.c1.g1319.i1
Hcv1.av93.c1.g1373.i1
Hcv1.av93.c1.g1394.i1
Hcv1.av93.c1.g1446.i1
Hcv1.av93.c1.g1451.i1
Hcv1.av93.c1.g1451.i3
Hcv1.av93.c1.g1484.i1
Hcv1.av93.c1.g1491.i1
Hcv1.av93.c1.g1547.i1
Hcv1.av93.c1.g1552.i1
Hcv1.av93.c1.g1609.i1
Hcv1.av93.c1.g1645.i1
Hcv1.av93.c1.g1658.i1
Hcv1.av93.c1.g165.i1
Hcv1.av93.c1.g1667.i1
Hcv1.av93.c1.g1672.i1
Hcv1.av93.c1.g183.i1
Hcv1.av93.c1.g185.i1
Hcv1.av93.c1.g255.i1
Hcv1.av93.c1.g255.i2
Hcv1.av93.c1.g279.i1
Hcv1.av93.c1.g284.i2
Hcv1.av93.c1.g284.i3
Hcv1.av93.c1.g285.i1
Hcv1.av93.c1.g285.i2
Hcv1.av93.c1.g285.i3
Hcv1.av93.c1.g285.i4
Hcv1.av93.c1.g285.i5
Hcv1.av93.c1.g286.i1
Hcv1.av93.c1.g286.i3
Hcv1.av93.c1.g286.i5
Hcv1.av93.c1.g286.i6
Hcv1.av93.c1.g292.i1
Hcv1.av93.c1.g292.i2
Hcv1.av93.c1.g303.i1
Hcv1.av93.c1.g320.i1
Hcv1.av93.c1.g320.i4
Hcv1.av93.c1.g320.i6
Hcv1.av93.c1.g329.i1
Hcv1.av93.c1.g329.i2
Hcv1.av93.c1.g330.i1
Hcv1.av93.c1.g405.i1
Hcv1.av93.c1.g418.i1
Hcv1.av93.c1.g447.i1
Hcv1.av93.c1.g456.i1
Hcv1.av93.c1.g467.i1
Hcv1.av93.c1.g467.i2
Hcv1.av93.c1.g485.i1
Hcv1.av93.c1.g50.i1
Hcv1.av93.c1.g50.i2
Hcv1.av93.c1.g51.i1
Hcv1.av93.c1.g538.i1
Hcv1.av93.c1.g567.i1
Hcv1.av93.c1.g577.i1
Hcv1.av93.c1.g599.i1
Hcv1.av93.c1.g607.i1
Hcv1.av93.c1.g624.i1
Hcv1.av93.c1.g638.i1
Hcv1.av93.c1.g649.i1
Hcv1.av93.c1.g649.i2
Hcv1.av93.c1.g685.i1
Hcv1.av93.c1.g685.i2
Hcv1.av93.c1.g687.i1
Hcv1.av93.c1.g755.i1
Hcv1.av93.c1.g757.i1
Hcv1.av93.c1.g757.i2
Hcv1.av93.c1.g765.i1
Hcv1.av93.c1.g765.i2
Hcv1.av93.c1.g798.i1
Hcv1.av93.c1.g877.i1
Hcv1.av93.c1.g881.i1
Hcv1.av93.c1.g940.i1
Hcv1.av93.c1.g969.i1
Hcv1.av93.c1.g975.i1
Hcv1.av93.c1.g982.i1
Hcv1.av93.c1.g98.i1
Hcv1.av93.c1.g997.i1
Hcv1.av93.c2.g100.i1
Hcv1.av93.c2.g1014.i1
Hcv1.av93.c2.g1036.i1
Hcv1.av93.c2.g1081.i1
Hcv1.av93.c2.g1085.i1
Hcv1.av93.c2.g1093.i1
Hcv1.av93.c2.g1102.i1
Hcv1.av93.c2.g1122.i1
Hcv1.av93.c2.g1145.i1
Hcv1.av93.c2.g1167.i1
Hcv1.av93.c2.g1230.i1
Hcv1.av93.c2.g1335.i1
Hcv1.av93.c2.g1336.i1
Hcv1.av93.c2.g1338.i1
Hcv1.av93.c2.g1344.i1
Hcv1.av93.c2.g1345.i1
Hcv1.av93.c2.g1349.i1
Hcv1.av93.c2.g1412.i1
Hcv1.av93.c2.g1412.i2
Hcv1.av93.c2.g1435.i1
Hcv1.av93.c2.g1436.i1
Hcv1.av93.c2.g1464.i1
Hcv1.av93.c2.g1481.i1
Hcv1.av93.c2.g1545.i1
Hcv1.av93.c2.g1562.i1
Hcv1.av93.c2.g1582.i1
Hcv1.av93.c2.g1599.i1
Hcv1.av93.c2.g1606.i1
Hcv1.av93.c2.g165.i1
Hcv1.av93.c2.g179.i1
Hcv1.av93.c2.g1.i1
Hcv1.av93.c2.g204.i1
Hcv1.av93.c2.g204.i2
Hcv1.av93.c2.g204.i3
Hcv1.av93.c2.g238.i1
Hcv1.av93.c2.g258.i1
Hcv1.av93.c2.g262.i1
Hcv1.av93.c2.g266.i1
Hcv1.av93.c2.g266.i2
Hcv1.av93.c2.g275.i1
Hcv1.av93.c2.g285.i1
Hcv1.av93.c2.g292.i1
Hcv1.av93.c2.g311.i1
Hcv1.av93.c2.g312.i1
Hcv1.av93.c2.g312.i2
Hcv1.av93.c2.g316.i1
Hcv1.av93.c2.g31.i1
Hcv1.av93.c2.g320.i1
Hcv1.av93.c2.g325.i1
Hcv1.av93.c2.g376.i1
Hcv1.av93.c2.g419.i1
Hcv1.av93.c2.g435.i1
Hcv1.av93.c2.g488.i1
Hcv1.av93.c2.g488.i3
Hcv1.av93.c2.g507.i1
Hcv1.av93.c2.g592.i1
Hcv1.av93.c2.g661.i1
Hcv1.av93.c2.g661.i2
Hcv1.av93.c2.g670.i1
Hcv1.av93.c2.g694.i1
Hcv1.av93.c2.g718.i1
Hcv1.av93.c2.g719.i1
Hcv1.av93.c2.g720.i1
Hcv1.av93.c2.g729.i1
Hcv1.av93.c2.g775.i1
Hcv1.av93.c2.g776.i1
Hcv1.av93.c2.g787.i1
Hcv1.av93.c2.g865.i1
Hcv1.av93.c2.g874.i1
Hcv1.av93.c2.g881.i1
Hcv1.av93.c2.g940.i1
Hcv1.av93.c2.g95.i1
Hcv1.av93.c2.g975.i1
Hcv1.av93.c2.g975.i2
Hcv1.av93.c2.g978.i1
Hcv1.av93.c2.g987.i1
Hcv1.av93.c3.g1027.i1
Hcv1.av93.c3.g1027.i2
Hcv1.av93.c3.g1094.i1
Hcv1.av93.c3.g1165.i1
Hcv1.av93.c3.g1186.i1
Hcv1.av93.c3.g1186.i2
Hcv1.av93.c3.g1225.i1
Hcv1.av93.c3.g122.i1
Hcv1.av93.c3.g1237.i1
Hcv1.av93.c3.g1289.i1
Hcv1.av93.c3.g1289.i2
Hcv1.av93.c3.g1289.i3
Hcv1.av93.c3.g129.i1
Hcv1.av93.c3.g1338.i1
Hcv1.av93.c3.g1345.i1
Hcv1.av93.c3.g1352.i1
Hcv1.av93.c3.g144.i1
Hcv1.av93.c3.g158.i1
Hcv1.av93.c3.g190.i1
Hcv1.av93.c3.g1.i2
Hcv1.av93.c3.g202.i1
Hcv1.av93.c3.g202.i2
Hcv1.av93.c3.g202.i3
Hcv1.av93.c3.g206.i2
Hcv1.av93.c3.g231.i1
Hcv1.av93.c3.g231.i2
Hcv1.av93.c3.g231.i3
Hcv1.av93.c3.g231.i4
Hcv1.av93.c3.g24.i1
Hcv1.av93.c3.g256.i1
Hcv1.av93.c3.g259.i1
Hcv1.av93.c3.g259.i2
Hcv1.av93.c3.g280.i1
Hcv1.av93.c3.g281.i1
Hcv1.av93.c3.g304.i1
Hcv1.av93.c3.g305.i1
Hcv1.av93.c3.g312.i1
Hcv1.av93.c3.g32.i1
Hcv1.av93.c3.g351.i1
Hcv1.av93.c3.g354.i1
Hcv1.av93.c3.g354.i2
Hcv1.av93.c3.g387.i1
Hcv1.av93.c3.g396.i1
Hcv1.av93.c3.g396.i2
Hcv1.av93.c3.g3.i1
Hcv1.av93.c3.g3.i2
Hcv1.av93.c3.g421.i1
Hcv1.av93.c3.g426.i1
Hcv1.av93.c3.g429.i1
Hcv1.av93.c3.g452.i2
Hcv1.av93.c3.g457.i1
Hcv1.av93.c3.g457.i2
Hcv1.av93.c3.g457.i3
Hcv1.av93.c3.g475.i1
Hcv1.av93.c3.g500.i1
Hcv1.av93.c3.g507.i1
Hcv1.av93.c3.g508.i1
Hcv1.av93.c3.g563.i1
Hcv1.av93.c3.g563.i2
Hcv1.av93.c3.g569.i1
Hcv1.av93.c3.g569.i2
Hcv1.av93.c3.g569.i3
Hcv1.av93.c3.g570.i1
Hcv1.av93.c3.g593.i1
Hcv1.av93.c3.g5.i1
Hcv1.av93.c3.g605.i1
Hcv1.av93.c3.g655.i1
Hcv1.av93.c3.g668.i1
Hcv1.av93.c3.g668.i2
Hcv1.av93.c3.g689.i1
Hcv1.av93.c3.g689.i2
Hcv1.av93.c3.g689.i3
Hcv1.av93.c3.g699.i1
Hcv1.av93.c3.g702.i1
Hcv1.av93.c3.g702.i2
Hcv1.av93.c3.g702.i3
Hcv1.av93.c3.g717.i1
Hcv1.av93.c3.g743.i1
Hcv1.av93.c3.g763.i1
Hcv1.av93.c3.g78.i1
Hcv1.av93.c3.g78.i2
Hcv1.av93.c3.g802.i1
Hcv1.av93.c3.g814.i1
Hcv1.av93.c3.g860.i1
Hcv1.av93.c3.g864.i1
Hcv1.av93.c3.g864.i2
Hcv1.av93.c3.g873.i1
Hcv1.av93.c3.g873.i2
Hcv1.av93.c3.g911.i1
Hcv1.av93.c3.g933.i1
Hcv1.av93.c3.g938.i1
Hcv1.av93.c4.g103.i1
Hcv1.av93.c4.g114.i1
Hcv1.av93.c4.g118.i1
Hcv1.av93.c4.g124.i1
Hcv1.av93.c4.g137.i1
Hcv1.av93.c4.g137.i2
Hcv1.av93.c4.g137.i3
Hcv1.av93.c4.g173.i1
Hcv1.av93.c4.g175.i1
Hcv1.av93.c4.g18.i1
Hcv1.av93.c4.g201.i1
Hcv1.av93.c4.g205.i1
Hcv1.av93.c4.g20.i1
Hcv1.av93.c4.g22.i1
Hcv1.av93.c4.g247.i1
Hcv1.av93.c4.g260.i1
Hcv1.av93.c4.g272.i1
Hcv1.av93.c4.g294.i1
Hcv1.av93.c4.g295.i1
Hcv1.av93.c4.g321.i1
Hcv1.av93.c4.g328.i1
Hcv1.av93.c4.g357.i1
Hcv1.av93.c4.g363.i1
Hcv1.av93.c4.g364.i1
Hcv1.av93.c4.g376.i1
Hcv1.av93.c4.g398.i1
Hcv1.av93.c4.g423.i1
Hcv1.av93.c4.g452.i1
Hcv1.av93.c4.g477.i1
Hcv1.av93.c4.g484.i1
Hcv1.av93.c4.g524.i1
Hcv1.av93.c4.g528.i1
Hcv1.av93.c4.g540.i1
Hcv1.av93.c4.g600.i3
Hcv1.av93.c4.g600.i4
Hcv1.av93.c4.g651.i1
Hcv1.av93.c4.g652.i1
Hcv1.av93.c4.g669.i1
Hcv1.av93.c4.g701.i1
Hcv1.av93.c4.g709.i1
Hcv1.av93.c4.g738.i1
Hcv1.av93.c4.g783.i1
Hcv1.av93.c4.g830.i1
Hcv1.av93.c4.g830.i2
Hcv1.av93.c4.g831.i1
Hcv1.av93.c4.g831.i2
Hcv1.av93.c4.g831.i3
Hcv1.av93.c4.g85.i1
Hcv1.av93.c4.g99.i1
Hcv1.av93.c5.g1026.i1
Hcv1.av93.c5.g1026.i2
Hcv1.av93.c5.g1026.i3
Hcv1.av93.c5.g1026.i4
Hcv1.av93.c5.g1026.i5
Hcv1.av93.c5.g1026.i6
Hcv1.av93.c5.g1030.i1
Hcv1.av93.c5.g1057.i1
Hcv1.av93.c5.g1100.i1
Hcv1.av93.c5.g1107.i1
Hcv1.av93.c5.g1122.i1
Hcv1.av93.c5.g1183.i1
Hcv1.av93.c5.g1184.i1
Hcv1.av93.c5.g1184.i2
Hcv1.av93.c5.g1202.i1
Hcv1.av93.c5.g1202.i2
Hcv1.av93.c5.g1202.i3
Hcv1.av93.c5.g1203.i1
Hcv1.av93.c5.g1220.i1
Hcv1.av93.c5.g1224.i1
Hcv1.av93.c5.g1237.i1
Hcv1.av93.c5.g1238.i1
Hcv1.av93.c5.g1296.i1
Hcv1.av93.c5.g1304.i1
Hcv1.av93.c5.g1304.i2
Hcv1.av93.c5.g1309.i1
Hcv1.av93.c5.g1333.i1
Hcv1.av93.c5.g146.i1
Hcv1.av93.c5.g153.i1
Hcv1.av93.c5.g178.i1
Hcv1.av93.c5.g192.i1
Hcv1.av93.c5.g21.i1
Hcv1.av93.c5.g243.i1
Hcv1.av93.c5.g251.i1
Hcv1.av93.c5.g284.i1
Hcv1.av93.c5.g304.i1
Hcv1.av93.c5.g306.i1
Hcv1.av93.c5.g317.i1
Hcv1.av93.c5.g394.i1
Hcv1.av93.c5.g442.i1
Hcv1.av93.c5.g461.i1
Hcv1.av93.c5.g481.i1
Hcv1.av93.c5.g481.i2
Hcv1.av93.c5.g481.i3
Hcv1.av93.c5.g481.i4
Hcv1.av93.c5.g481.i5
Hcv1.av93.c5.g526.i1
Hcv1.av93.c5.g530.i1
Hcv1.av93.c5.g556.i1
Hcv1.av93.c5.g611.i1
Hcv1.av93.c5.g626.i1
Hcv1.av93.c5.g626.i2
Hcv1.av93.c5.g643.i1
Hcv1.av93.c5.g643.i2
Hcv1.av93.c5.g672.i1
Hcv1.av93.c5.g704.i1
Hcv1.av93.c5.g726.i1
Hcv1.av93.c5.g731.i1
Hcv1.av93.c5.g757.i1
Hcv1.av93.c5.g76.i1
Hcv1.av93.c5.g76.i2
Hcv1.av93.c5.g76.i3
Hcv1.av93.c5.g76.i4
Hcv1.av93.c5.g788.i1
Hcv1.av93.c5.g829.i1
Hcv1.av93.c5.g843.i1
Hcv1.av93.c5.g861.i1
Hcv1.av93.c5.g864.i1
Hcv1.av93.c5.g864.i2
Hcv1.av93.c5.g898.i1
Hcv1.av93.c5.g915.i1
Hcv1.av93.c5.g915.i2
Hcv1.av93.c5.g929.i1
Hcv1.av93.c5.g929.i2
Hcv1.av93.c5.g953.i1
Hcv1.av93.c5.g986.i1
Hcv1.av93.c5.g986.i2
Hcv1.av93.c6.g1008.i1
Hcv1.av93.c6.g1019.i1
Hcv1.av93.c6.g1061.i1
Hcv1.av93.c6.g1070.i1
Hcv1.av93.c6.g1078.i1
Hcv1.av93.c6.g1087.i1
Hcv1.av93.c6.g1101.i1
Hcv1.av93.c6.g1101.i2
Hcv1.av93.c6.g1102.i1
Hcv1.av93.c6.g117.i1
Hcv1.av93.c6.g1181.i1
Hcv1.av93.c6.g1182.i1
Hcv1.av93.c6.g1186.i1
Hcv1.av93.c6.g1190.i1
Hcv1.av93.c6.g1220.i1
Hcv1.av93.c6.g1235.i1
Hcv1.av93.c6.g1253.i1
Hcv1.av93.c6.g1258.i1
Hcv1.av93.c6.g1278.i1
Hcv1.av93.c6.g1278.i2
Hcv1.av93.c6.g166.i1
Hcv1.av93.c6.g181.i1
Hcv1.av93.c6.g188.i1
Hcv1.av93.c6.g210.i1
Hcv1.av93.c6.g224.i1
Hcv1.av93.c6.g247.i1
Hcv1.av93.c6.g247.i2
Hcv1.av93.c6.g247.i3
Hcv1.av93.c6.g26.i1
Hcv1.av93.c6.g279.i1
Hcv1.av93.c6.g288.i1
Hcv1.av93.c6.g2.i1
Hcv1.av93.c6.g318.i1
Hcv1.av93.c6.g342.i1
Hcv1.av93.c6.g348.i1
Hcv1.av93.c6.g349.i1
Hcv1.av93.c6.g34.i1
Hcv1.av93.c6.g352.i1
Hcv1.av93.c6.g359.i1
Hcv1.av93.c6.g363.i1
Hcv1.av93.c6.g363.i2
Hcv1.av93.c6.g37.i1
Hcv1.av93.c6.g380.i1
Hcv1.av93.c6.g380.i2
Hcv1.av93.c6.g400.i1
Hcv1.av93.c6.g403.i1
Hcv1.av93.c6.g403.i2
Hcv1.av93.c6.g424.i1
Hcv1.av93.c6.g443.i1
Hcv1.av93.c6.g443.i2
Hcv1.av93.c6.g452.i1
Hcv1.av93.c6.g466.i1
Hcv1.av93.c6.g466.i2
Hcv1.av93.c6.g473.i1
Hcv1.av93.c6.g477.i1
Hcv1.av93.c6.g477.i2
Hcv1.av93.c6.g542.i1
Hcv1.av93.c6.g54.i1
Hcv1.av93.c6.g562.i1
Hcv1.av93.c6.g562.i2
Hcv1.av93.c6.g564.i1
Hcv1.av93.c6.g572.i1
Hcv1.av93.c6.g5.i1
Hcv1.av93.c6.g601.i1
Hcv1.av93.c6.g610.i2
Hcv1.av93.c6.g612.i1
Hcv1.av93.c6.g624.i1
Hcv1.av93.c6.g62.i1
Hcv1.av93.c6.g62.i2
Hcv1.av93.c6.g630.i1
Hcv1.av93.c6.g639.i1
Hcv1.av93.c6.g63.i1
Hcv1.av93.c6.g652.i1
Hcv1.av93.c6.g655.i1
Hcv1.av93.c6.g672.i1
Hcv1.av93.c6.g722.i1
Hcv1.av93.c6.g722.i2
Hcv1.av93.c6.g734.i1
Hcv1.av93.c6.g736.i1
Hcv1.av93.c6.g736.i2
Hcv1.av93.c6.g775.i1
Hcv1.av93.c6.g786.i1
Hcv1.av93.c6.g805.i1
Hcv1.av93.c6.g807.i1
Hcv1.av93.c6.g814.i1
Hcv1.av93.c6.g814.i2
Hcv1.av93.c6.g864.i1
Hcv1.av93.c6.g893.i1
Hcv1.av93.c6.g938.i1
Hcv1.av93.c6.g966.i1
Hcv1.av93.c6.g966.i2
Hcv1.av93.c6.g977.i1
Hcv1.av93.c6.g996.i1
Hcv1.av93.c6.g996.i2
Hcv1.av93.c7.g1009.i1
Hcv1.av93.c7.g1009.i2
Hcv1.av93.c7.g1019.i1
Hcv1.av93.c7.g1032.i1
Hcv1.av93.c7.g1065.i1
Hcv1.av93.c7.g115.i1
Hcv1.av93.c7.g115.i2
Hcv1.av93.c7.g115.i3
Hcv1.av93.c7.g148.i1
Hcv1.av93.c7.g153.i1
Hcv1.av93.c7.g153.i2
Hcv1.av93.c7.g162.i1
Hcv1.av93.c7.g189.i1
Hcv1.av93.c7.g220.i1
Hcv1.av93.c7.g241.i1
Hcv1.av93.c7.g255.i1
Hcv1.av93.c7.g272.i1
Hcv1.av93.c7.g273.i1
Hcv1.av93.c7.g305.i1
Hcv1.av93.c7.g342.i1
Hcv1.av93.c7.g369.i1
Hcv1.av93.c7.g371.i1
Hcv1.av93.c7.g393.i1
Hcv1.av93.c7.g403.i1
Hcv1.av93.c7.g405.i1
Hcv1.av93.c7.g405.i2
Hcv1.av93.c7.g406.i1
Hcv1.av93.c7.g417.i1
Hcv1.av93.c7.g417.i2
Hcv1.av93.c7.g417.i3
Hcv1.av93.c7.g423.i1
Hcv1.av93.c7.g431.i1
Hcv1.av93.c7.g470.i1
Hcv1.av93.c7.g490.i1
Hcv1.av93.c7.g502.i1
Hcv1.av93.c7.g523.i1
Hcv1.av93.c7.g526.i1
Hcv1.av93.c7.g546.i2
Hcv1.av93.c7.g546.i3
Hcv1.av93.c7.g546.i4
Hcv1.av93.c7.g546.i5
Hcv1.av93.c7.g548.i1
Hcv1.av93.c7.g550.i1
Hcv1.av93.c7.g560.i1
Hcv1.av93.c7.g562.i1
Hcv1.av93.c7.g562.i2
Hcv1.av93.c7.g582.i1
Hcv1.av93.c7.g582.i2
Hcv1.av93.c7.g610.i1
Hcv1.av93.c7.g610.i2
Hcv1.av93.c7.g700.i1
Hcv1.av93.c7.g700.i2
Hcv1.av93.c7.g715.i1
Hcv1.av93.c7.g733.i1
Hcv1.av93.c7.g746.i1
Hcv1.av93.c7.g780.i1
Hcv1.av93.c7.g811.i1
Hcv1.av93.c7.g864.i1
Hcv1.av93.c7.g899.i1
Hcv1.av93.c7.g913.i1
Hcv1.av93.c7.g986.i1
Hcv1.av93.c7.g989.i1
Hcv1.av93.c8.g1001.i1
Hcv1.av93.c8.g11.i1
Hcv1.av93.c8.g123.i1
Hcv1.av93.c8.g152.i1
Hcv1.av93.c8.g179.i1
Hcv1.av93.c8.g214.i1
Hcv1.av93.c8.g237.i1
Hcv1.av93.c8.g271.i1
Hcv1.av93.c8.g274.i1
Hcv1.av93.c8.g309.i1
Hcv1.av93.c8.g327.i1
Hcv1.av93.c8.g340.i1
Hcv1.av93.c8.g358.i1
Hcv1.av93.c8.g359.i1
Hcv1.av93.c8.g370.i1
Hcv1.av93.c8.g370.i2
Hcv1.av93.c8.g376.i1
Hcv1.av93.c8.g435.i1
Hcv1.av93.c8.g439.i1
Hcv1.av93.c8.g448.i1
Hcv1.av93.c8.g449.i1
Hcv1.av93.c8.g449.i2
Hcv1.av93.c8.g449.i3
Hcv1.av93.c8.g462.i1
Hcv1.av93.c8.g462.i2
Hcv1.av93.c8.g489.i1
Hcv1.av93.c8.g499.i1
Hcv1.av93.c8.g504.i1
Hcv1.av93.c8.g505.i1
Hcv1.av93.c8.g540.i1
Hcv1.av93.c8.g604.i1
Hcv1.av93.c8.g647.i1
Hcv1.av93.c8.g647.i2
Hcv1.av93.c8.g663.i1
Hcv1.av93.c8.g751.i1
Hcv1.av93.c8.g756.i1
Hcv1.av93.c8.g759.i1
Hcv1.av93.c8.g770.i1
Hcv1.av93.c8.g774.i1
Hcv1.av93.c8.g790.i1
Hcv1.av93.c8.g825.i1
Hcv1.av93.c8.g833.i1
Hcv1.av93.c8.g849.i1
Hcv1.av93.c8.g867.i1
Hcv1.av93.c8.g882.i1
Hcv1.av93.c8.g895.i1
Hcv1.av93.c8.g896.i1
Hcv1.av93.c8.g957.i1
Hcv1.av93.c9.g121.i1
Hcv1.av93.c9.g122.i1
Hcv1.av93.c9.g159.i1
Hcv1.av93.c9.g172.i1
Hcv1.av93.c9.g221.i1
Hcv1.av93.c9.g221.i2
Hcv1.av93.c9.g221.i3
Hcv1.av93.c9.g229.i1
Hcv1.av93.c9.g24.i1
Hcv1.av93.c9.g260.i1
Hcv1.av93.c9.g26.i1
Hcv1.av93.c9.g275.i1
Hcv1.av93.c9.g279.i1
Hcv1.av93.c9.g284.i1
Hcv1.av93.c9.g284.i2
Hcv1.av93.c9.g284.i3
Hcv1.av93.c9.g300.i1
Hcv1.av93.c9.g300.i2
Hcv1.av93.c9.g321.i1
Hcv1.av93.c9.g321.i2
Hcv1.av93.c9.g331.i1
Hcv1.av93.c9.g350.i1
Hcv1.av93.c9.g376.i1
Hcv1.av93.c9.g377.i1
Hcv1.av93.c9.g389.i1
Hcv1.av93.c9.g403.i1
Hcv1.av93.c9.g417.i1
Hcv1.av93.c9.g417.i2
Hcv1.av93.c9.g435.i1
Hcv1.av93.c9.g435.i2
Hcv1.av93.c9.g44.i1
Hcv1.av93.c9.g461.i1
Hcv1.av93.c9.g469.i1
Hcv1.av93.c9.g477.i1
Hcv1.av93.c9.g481.i1
Hcv1.av93.c9.g515.i1
Hcv1.av93.c9.g581.i1
Hcv1.av93.c9.g584.i1
Hcv1.av93.c9.g597.i1
Hcv1.av93.c9.g597.i2
Hcv1.av93.c9.g617.i1
Hcv1.av93.c9.g699.i1
Hcv1.av93.c9.g700.i1
Hcv1.av93.c9.g704.i1
Hcv1.av93.c9.g718.i1
Hcv1.av93.c9.g724.i1
Hcv1.av93.c9.g764.i1
Hcv1.av93.c9.g767.i1
Hcv1.av93.c9.g768.i1
Hcv1.av93.c9.g778.i1
Hcv1.av93.c9.g779.i1
Hcv1.av93.c9.g792.i1
Hcv1.av93.c9.g800.i1
Hcv1.av93.c9.g806.i1
Hcv1.av93.c9.g848.i1
Hcv1.av93.c9.g860.i1
Hcv1.av93.c9.g861.i1
Hcv1.av93.c9.g866.i1
Hcv1.av93.c9.g902.i1
Hcv1.av93.c9.g902.i2
Hcv1.av93.c9.g903.i1
Hcv1.av93.c9.g912.i1
Hcv1.av93.c9.g916.i1
Hcv1.av93.c9.g935.i1
Hcv1.av93.c9.g936.i1
Hcv1.av93.c9.g940.i1
Hcv1.av93.c9.g942.i1
Hcv1.av93.c9.g950.i1
Hcv1.av93.c9.g953.i2
Hcv1.av93.c9.g95.i1
Hcv1.av93.sca11.g2.i1
Hcv1.av93.sca18.g1.i1
Hcv1.av93.sca1.g1.i1
Hcv1.av93.sca1.g6.i1
Hcv1.av93.sca22.g1.i1
Hcv1.av93.sca22.g1.i2
Hcv1.av93.sca22.g1.i3
Hcv1.av93.sca23.g2.i1
Hcv1.av93.sca5.g1.i1
Hcv1.av93.sca9.g1.i1
Hcv1.av93.sca9.g4.i1

## Sheet: HormiphoraOnlyAnnotation
# This list only contains transcripts that did not have blastp hits in Mnemiopsis or Pleurobrachia
# column 1 is the transcript. column 2 is the annotation from blastp.
Hcv1.av93.c1.g50.i1	E3 ubiquitin-protein ligase znrf2-like isoform X2
Hcv1.av93.c1.g50.i2	E3 ubiquitin-protein ligase ZNRF2-like
Hcv1.av93.c1.g51.i1	laminin subunit alpha-2
Hcv1.av93.c1.g284.i2	TCAL_09413
Hcv1.av93.c1.g284.i3	TCAL_09413
Hcv1.av93.c1.g320.i1	Poli38472_010910
Hcv1.av93.c1.g320.i4	Poli38472_010910
Hcv1.av93.c1.g320.i6	S-antigen protein
Hcv1.av93.c1.g329.i1	UNC93-like protein MFSD11
Hcv1.av93.c1.g329.i2	UNC93-like protein MFSD11
Hcv1.av93.c1.g330.i1	endogenous retrovirus group K member 8 Gag polyprotein-like
Hcv1.av93.c1.g467.i1	AT-rich interactive domain-containing protein 5B-like isoform X1
Hcv1.av93.c1.g467.i2	AT-rich interactive domain-containing protein 5B-like isoform X1
Hcv1.av93.c1.g538.i1	OCBIM_22004484mg partial
Hcv1.av93.c1.g624.i1	potassium channel subfamily K member 1-like isoform X1
Hcv1.av93.c1.g765.i1	relA-associated inhibitor isoform X2
Hcv1.av93.c1.g765.i2	relA-associated inhibitor isoform X2
Hcv1.av93.c1.g940.i1	nucleoporin 214 L homeolog
Hcv1.av93.c1.g975.i1	BOX15_Mlig014276g1 partial
Hcv1.av93.c1.g997.i1	ribonuclease P
Hcv1.av93.c1.g1112.i1	zinc finger protein partial
Hcv1.av93.c1.g1373.i1	45 kDa calcium-binding protein
Hcv1.av93.c1.g1484.i1	TM2 domain-containing protein 2
Hcv1.av93.c1.g1667.i1	AN1-type zinc finger protein 4-like
Hcv1.av93.c2.g165.i1	cleavage stimulation factor subunit 2 tau variant isoform X1
Hcv1.av93.c2.g238.i1	trafficking protein particle complex subunit 11-like isoform X2
Hcv1.av93.c2.g258.i1	ADP-dependent glucokinase
Hcv1.av93.c2.g262.i1	ADP-dependent glucokinase
Hcv1.av93.c2.g292.i1	LOW QUALITY PROTEIN exopolyphosphatase PRUNE1
Hcv1.av93.c2.g488.i1	AWC38_SpisGene14780
Hcv1.av93.c2.g488.i3	AWC38_SpisGene14780
Hcv1.av93.c2.g507.i1	Speckle-type POZ protein B
Hcv1.av93.c2.g670.i1	cysteinyl leukotriene receptor 2
Hcv1.av93.c2.g694.i1	CcCBS67573_g05373
Hcv1.av93.c2.g719.i1	RNA binding family protein isoform 7
Hcv1.av93.c2.g720.i1	DAZ-1 partial
Hcv1.av93.c2.g775.i1	EIP91_004334
Hcv1.av93.c2.g787.i1	C0Q70_08237
Hcv1.av93.c2.g874.i1	7-dehydrocholesterol reductase-like isoform X1
Hcv1.av93.c2.g978.i1	GPI mannosyltransferase 1
Hcv1.av93.c2.g1093.i1	transmembrane protein 258-like
Hcv1.av93.c2.g1167.i1	enoyl-CoA delta isomerase 2 mitochondrial-like
Hcv1.av93.c2.g1336.i1	protein product
Hcv1.av93.c2.g1338.i1	conserved unknown protein
Hcv1.av93.c2.g1562.i1	E3 ubiquitin-protein ligase rnf213-alpha-like
Hcv1.av93.c2.g1599.i1	protein RD3-like
Hcv1.av93.c3.g3.i1	akirin
Hcv1.av93.c3.g24.i1	intraflagellar transport protein 25 homolog
Hcv1.av93.c3.g190.i1	protein product partial
Hcv1.av93.c3.g256.i1	protein FAM8A1
Hcv1.av93.c3.g281.i1	histone-lysine N-methyltransferase 2B-like
Hcv1.av93.c3.g354.i1	TCAL_00601
Hcv1.av93.c3.g354.i2	TCAL_00601
Hcv1.av93.c3.g387.i1	26S proteasome complex subunit SEM1-like
Hcv1.av93.c3.g421.i1	CXXC-type zinc finger protein 1-like isoform X2
Hcv1.av93.c3.g429.i1	pdam_00022753
Hcv1.av93.c3.g500.i1	A2987_02165
Hcv1.av93.c3.g570.i1	sulfotransferase 1A1-like
Hcv1.av93.c3.g593.i1	mitochondrial peptide methionine sulfoxide reductase isoform X1
Hcv1.av93.c3.g689.i1	NADP-dependent malic enzyme mitochondrial isoform X1
Hcv1.av93.c3.g689.i2	NADP-dependent malic enzyme mitochondrial isoform X1
Hcv1.av93.c3.g689.i3	NADP-dependent malic enzyme mitochondrial isoform X1
Hcv1.av93.c3.g699.i1	cytochrome b561
Hcv1.av93.c3.g763.i1	polyribonucleotide 5'-hydroxyl-kinase Clp1 isoform X1
Hcv1.av93.c3.g802.i1	HIT-like domain-containing protein
Hcv1.av93.c3.g873.i1	low-density lipoprotein receptor-related protein 1B-like
Hcv1.av93.c3.g873.i2	low-density lipoprotein receptor-related protein 1B-like
Hcv1.av93.c3.g933.i1	PaG_05460
Hcv1.av93.c3.g1186.i1	zinc finger protein
Hcv1.av93.c3.g1186.i2	zinc finger protein
Hcv1.av93.c3.g1237.i1	transmembrane protein 187
Hcv1.av93.c3.g1289.i3	MIT domain-containing protein 1 isoform X1
Hcv1.av93.c4.g18.i1	protein-tyrosine phosphatase mitochondrial 1-like protein
Hcv1.av93.c4.g137.i1	cyclin-L2-like
Hcv1.av93.c4.g137.i2	Cyclin-L2
Hcv1.av93.c4.g137.i3	Cyclin-L2
Hcv1.av93.c4.g272.i1	A-kinase-interacting protein 1-like
Hcv1.av93.c4.g295.i1	AC249_AIPGENE28386 partial
Hcv1.av93.c4.g669.i1	transmembrane protein 120A-like
Hcv1.av93.c4.g831.i1	toll-like receptor 7 isoform X2
Hcv1.av93.c5.g76.i1	protein FAM81A-like
Hcv1.av93.c5.g76.i2	protein FAM81A-like
Hcv1.av93.c5.g76.i3	protein FAM81A-like
Hcv1.av93.c5.g76.i4	protein FAM81A-like
Hcv1.av93.c5.g153.i1	ATPase SWSAP1
Hcv1.av93.c5.g178.i1	zinc finger MYM-type protein 1-like
Hcv1.av93.c5.g192.i1	tyrosine-protein phosphatase Lar-like isoform X1
Hcv1.av93.c5.g243.i1	signal recognition particle 14 kDa protein
Hcv1.av93.c5.g317.i1	transmembrane protein 203-like
Hcv1.av93.c5.g526.i1	centromere protein S-like
Hcv1.av93.c5.g626.i1	protein mago nashi homolog
Hcv1.av93.c5.g643.i1	F-box protein SKP2B-like
Hcv1.av93.c5.g643.i2	F-box protein SKP2B-like
Hcv1.av93.c5.g731.i1	transcription termination factor 1-like
Hcv1.av93.c5.g788.i1	protein Sec61 subunit gamma
Hcv1.av93.c5.g843.i1	UBA-like domain-containing protein 2
Hcv1.av93.c5.g861.i1	vitellogenin receptor
Hcv1.av93.c5.g898.i1	DUI87_27939
Hcv1.av93.c5.g915.i1	protein boule-like isoform X1
Hcv1.av93.c5.g915.i2	protein boule-like isoform X1
Hcv1.av93.c5.g929.i1	SURP and G-patch domain-containing protein 1-like
Hcv1.av93.c5.g929.i2	SURP and G-patch domain-containing protein 1-like
Hcv1.av93.c5.g986.i1	flavin-containing monooxygenase FMO GS-OX-like 4 isoform X1
Hcv1.av93.c5.g986.i2	flavin-containing monooxygenase FMO GS-OX-like 2
Hcv1.av93.c5.g1026.i2	tropomyosin
Hcv1.av93.c5.g1026.i5	tropomyosin
Hcv1.av93.c5.g1057.i1	lipopolysaccharide-induced tumor necrosis factor-alpha factor homolog isoform X1
Hcv1.av93.c5.g1122.i1	methylmalonic aciduria and homocystinuria type C protein
Hcv1.av93.c5.g1183.i1	cyclic pyranopterin monophosphate synthase mitochondrial-like
Hcv1.av93.c5.g1220.i1	HAUS augmin-like complex subunit 6
Hcv1.av93.c5.g1237.i1	THAP domain-containing protein 11
Hcv1.av93.c5.g1238.i1	TcasGA2_TC031081
Hcv1.av93.c5.g1296.i1	oxidoreductase TDA3
Hcv1.av93.c5.g1304.i1	NO HIT
Hcv1.av93.c5.g1304.i2	NO HIT
Hcv1.av93.c6.g34.i1	protein FAM210B mitochondrial
Hcv1.av93.c6.g166.i1	Spermidine synthase
Hcv1.av93.c6.g188.i1	DnaJ domain-containing protein
Hcv1.av93.c6.g403.i1	alpha/beta hydrolase
Hcv1.av93.c6.g403.i2	alpha/beta hydrolase
Hcv1.av93.c6.g443.i1	insulin-like growth factor 2 mRNA-binding protein 1 isoform X3
Hcv1.av93.c6.g443.i2	insulin-like growth factor 2 mRNA-binding protein 1 isoform X1
Hcv1.av93.c6.g466.i1	CUB and sushi domain-containing protein 1 isoform X2
Hcv1.av93.c6.g466.i2	CUB and sushi domain-containing protein 1 isoform X2
Hcv1.av93.c6.g564.i1	E3 SUMO-protein ligase RNF212 isoform X2
Hcv1.av93.c6.g601.i1	40S ribosomal protein S11
Hcv1.av93.c6.g610.i2	cysteine-rich hydrophobic domain-containing protein 2-like
Hcv1.av93.c6.g612.i1	39S ribosomal protein L11 mitochondrial
Hcv1.av93.c6.g672.i1	THAP domain-containing protein partial
Hcv1.av93.c6.g734.i1	secretory peptide-35
Hcv1.av93.c6.g938.i1	isopentenyl-diphosphate delta-isomerase
Hcv1.av93.c6.g1008.i1	DNA repair protein complementing cells homolog isoform X1
Hcv1.av93.c6.g1019.i1	DBV15_01679
Hcv1.av93.c6.g1070.i1	CCN family member 1-like
Hcv1.av93.c6.g1101.i1	peroxiredoxin-5 mitochondrial-like
Hcv1.av93.c6.g1101.i2	peroxiredoxin-5 mitochondrial-like
Hcv1.av93.c6.g1102.i1	sushi von Willebrand factor type A EGF and pentraxin domain-containing protein 1-like
Hcv1.av93.c6.g1235.i1	mediator of RNA polymerase II transcription subunit 31
Hcv1.av93.c6.g1278.i1	calmodulin-like protein 3
Hcv1.av93.c6.g1278.i2	calmodulin-like protein 12
Hcv1.av93.c7.g162.i1	thyroglobulin
Hcv1.av93.c7.g241.i1	Sex-determining transformer protein 1
Hcv1.av93.c7.g342.i1	meiosis 1 arrest protein
Hcv1.av93.c7.g406.i1	tryptophan-rich sensory protein
Hcv1.av93.c7.g550.i1	cyclic nucleotide-binding domain-containing protein 2-like
Hcv1.av93.c7.g562.i1	homeobox protein knotted-1-like 1
Hcv1.av93.c7.g562.i2	homeobox protein knotted-1-like 1
Hcv1.av93.c7.g610.i1	lipoyltransferase 2 mitochondrial
Hcv1.av93.c7.g610.i2	calmodulin
Hcv1.av93.c7.g733.i1	regulator of G-protein signaling 22-like isoform X1
Hcv1.av93.c7.g746.i1	core histone H2A/H2B/H3/H4
Hcv1.av93.c7.g780.i1	cardiolipin synthase (CMP-forming)
Hcv1.av93.c7.g1019.i1	alpha-protein kinase 1-like
Hcv1.av93.c7.g1065.i1	28S ribosomal protein S10 mitochondrial-like
Hcv1.av93.c8.g237.i1	gem-associated protein 6
Hcv1.av93.c8.g271.i1	OCBIM_22019291mg
Hcv1.av93.c8.g274.i1	OCBIM_22013554mg
Hcv1.av93.c8.g370.i1	prolyl 3-hydroxylase 1 isoform X1
Hcv1.av93.c8.g370.i2	prolyl 3-hydroxylase 1 isoform X1
Hcv1.av93.c8.g435.i1	5'-AMP-activated protein kinase subunit beta-1
Hcv1.av93.c8.g449.i1	nuclease HARBI1
Hcv1.av93.c8.g449.i2	nuclease HARBI1
Hcv1.av93.c8.g449.i3	nuclease HARBI1
Hcv1.av93.c8.g540.i1	AWC38_SpisGene14780
Hcv1.av93.c8.g647.i1	crk-like protein
Hcv1.av93.c8.g647.i2	crk-like protein
Hcv1.av93.c8.g770.i1	acyl-coenzyme A thioesterase 13
Hcv1.av93.c8.g774.i1	oxidoreductase YvaG
Hcv1.av93.c8.g790.i1	coiled-coil domain-containing protein
Hcv1.av93.c8.g833.i1	ARL3 partial
Hcv1.av93.c8.g867.i1	AZI85_06720
Hcv1.av93.c9.g172.i1	OJAV_G00108820
Hcv1.av93.c9.g221.i1	CAAX prenyl protease 2-like
Hcv1.av93.c9.g221.i2	CAAX prenyl protease 2
Hcv1.av93.c9.g221.i3	CAAX prenyl protease 2 isoform X2
Hcv1.av93.c9.g229.i1	double-stranded RNA-binding protein 1-like isoform X3
Hcv1.av93.c9.g350.i1	NADH dehydrogenase
Hcv1.av93.c9.g376.i1	lipopolysaccharide-induced tumor necrosis factor-alpha factor homolog isoform X2
Hcv1.av93.c9.g469.i1	phospholipid phosphatase 6-like
Hcv1.av93.c9.g477.i1	transmembrane protein 65-like isoform X2
Hcv1.av93.c9.g581.i1	gamma-glutamylcyclotransferase
Hcv1.av93.c9.g806.i1	PIH1 domain-containing protein 2
Hcv1.av93.c9.g860.i1	60S ribosomal protein L38
Hcv1.av93.c9.g940.i1	CD209 antigen-like protein 2
Hcv1.av93.c9.g942.i1	reversion-inducing cysteine-rich protein with Kazal motifs
Hcv1.av93.c10.g28.i1	cx9C motif-containing protein 4
Hcv1.av93.c10.g94.i1	Putative phosphatidate phosphatase
Hcv1.av93.c10.g109.i1	transmembrane ascorbate ferrireductase 1
Hcv1.av93.c10.g109.i2	cytochrome b ascorbate-dependent protein 3
Hcv1.av93.c10.g109.i3	transmembrane ascorbate ferrireductase 1
Hcv1.av93.c10.g180.i1	ATP-citrate synthase-like
Hcv1.av93.c10.g218.i1	SAICAR synthase-like protein
Hcv1.av93.c10.g228.i1	leucine-rich repeat-containing protein
Hcv1.av93.c10.g228.i2	leucine-rich repeat-containing protein
Hcv1.av93.c10.g461.i1	secretory peptide-46
Hcv1.av93.c10.g462.i1	BAG family molecular chaperone regulator 1
Hcv1.av93.c10.g515.i1	leucine-rich repeat-containing protein 69-like
Hcv1.av93.c10.g558.i1	thioredoxin
Hcv1.av93.c10.g690.i1	DNA-directed RNA polymerase II subunit RPB11-a-like
Hcv1.av93.c10.g758.i1	copper amine oxidase
Hcv1.av93.c10.g758.i2	copper amine oxidase
Hcv1.av93.c11.g79.i1	SCO-spondin-like
Hcv1.av93.c11.g235.i1	GPECTOR_14g152
Hcv1.av93.c11.g246.i1	APOPT family protein CG14806 mitochondrial
Hcv1.av93.c11.g358.i1	protein product
Hcv1.av93.c11.g465.i1	secretory peptide-20
Hcv1.av93.c11.g639.i1	Sentrin-specific protease 8
Hcv1.av93.c11.g640.i1	molybdopterin synthase sulfur carrier subunit
Hcv1.av93.c11.g697.i1	ATP-binding cassette sub-family A member 3
Hcv1.av93.c11.g715.i1	Krueppel-like factor 14
Hcv1.av93.c11.g715.i2	Krueppel-like factor 14
Hcv1.av93.c11.g780.i1	50S ribosomal protein L1
Hcv1.av93.c11.g855.i1	Fibrillin-1
Hcv1.av93.c11.g893.i1	transmembrane protein 41B-like
Hcv1.av93.c11.g916.i1	ankyrin repeat and SAM domain-containing protein 3-like
Hcv1.av93.c12.g72.i1	MFS-type transporter SLC18B1
Hcv1.av93.c12.g304.i1	multiple coagulation factor deficiency protein 2-like
Hcv1.av93.c12.g341.i1	MFS transporter
Hcv1.av93.c12.g511.i1	transient receptor potential cation channel subfamily M member 6
Hcv1.av93.c13.g57.i1	stress-associated endoplasmic reticulum protein 1
Hcv1.av93.c13.g100.i1	ketimine reductase mu-crystallin
Hcv1.av93.c13.g100.i2	ketimine reductase mu-crystallin
Hcv1.av93.c13.g116.i1	Beta propeller repeat TECPR
Hcv1.av93.c13.g257.i1	calmodulin
Hcv1.av93.c13.g386.i1	G-protein coupled receptor 157-like
Hcv1.av93.c13.g541.i3	retinoic acid receptor RXR-gamma isoform X2
Hcv1.av93.c13.g541.i5	retinoic acid receptor RXR-gamma isoform X2

## Sheet: NestedIntronicGenes
# these are the nested intronic genes, and their host genes
chrom	gene	gene_start	gene_stop	surrounding_gene	surrounding_start	surrounding_stop	sense_anti	num_exons
c1	Hcv1.av93.c1.g1005.i1	6205096	6205790	Hcv1.av93.c1.g1003.i1	6204733	6205904	sense	2
c1	Hcv1.av93.c1.g1005.i1	6205096	6205790	Hcv1.av93.c1.g1004.i1	6204757	6209402	sense	2
c1	Hcv1.av93.c1.g1007.i1	6217176	6218038	Hcv1.av93.c1.g1004.i1	6214389	6219838	antisense	1
c1	Hcv1.av93.c1.g1008.i1	6219050	6219802	Hcv1.av93.c1.g1004.i1	6214389	6219838	sense	1
c1	Hcv1.av93.c1.g102.i1	790513	791111	Hcv1.av93.c1.g101.i1	789394	793516	sense	1
c1	Hcv1.av93.c1.g102.i1	790513	791111	Hcv1.av93.c1.g101.i2	789394	793516	sense	1
c1	Hcv1.av93.c1.g1064.i1	6494935	6502295	Hcv1.av93.c1.g1063.i1	6494418	6502109	antisense	13
c1	Hcv1.av93.c1.g1064.i1	6494935	6502295	Hcv1.av93.c1.g1063.i2	6494418	6502109	antisense	13
c1	Hcv1.av93.c1.g1064.i2	6494935	6502295	Hcv1.av93.c1.g1063.i1	6494418	6502109	antisense	14
c1	Hcv1.av93.c1.g1064.i2	6494935	6502295	Hcv1.av93.c1.g1063.i2	6494418	6502109	antisense	14
c1	Hcv1.av93.c1.g1070.i1	6529058	6529498	Hcv1.av93.c1.g1069.i1	6528942	6529853	antisense	1
c1	Hcv1.av93.c1.g1078.i1	6558486	6560341	Hcv1.av93.c1.g1077.i1	6556449	6560578	antisense	2
c1	Hcv1.av93.c1.g1081.i1	6588077	6588584	Hcv1.av93.c1.g1080.i1	6582980	6589178	sense	1
c1	Hcv1.av93.c1.g1087.i1	6621520	6622950	Hcv1.av93.c1.g1086.i1	6619832	6623416	sense	1
c1	Hcv1.av93.c1.g1087.i1	6621520	6622950	Hcv1.av93.c1.g1086.i2	6619832	6623416	sense	1
c1	Hcv1.av93.c1.g1090.i1	6630710	6631688	Hcv1.av93.c1.g1089.i1	6629521	6632372	antisense	1
c1	Hcv1.av93.c1.g1091.i1	6637191	6639036	Hcv1.av93.c1.g1089.i1	6637207	6639653	antisense	2
c1	Hcv1.av93.c1.g1092.i1	6642363	6644065	Hcv1.av93.c1.g1089.i1	6641420	6644143	sense	1
c1	Hcv1.av93.c1.g1097.i1	6688960	6691067	Hcv1.av93.c1.g1096.i1	6687820	6693685	sense	1
c1	Hcv1.av93.c1.g1105.i1	6717634	6718716	Hcv1.av93.c1.g1104.i1	6717572	6726468	sense	3
c1	Hcv1.av93.c1.g1106.i1	6719567	6721282	Hcv1.av93.c1.g1104.i1	6717572	6726468	sense	1
c1	Hcv1.av93.c1.g1107.i1	6721472	6723128	Hcv1.av93.c1.g1104.i1	6717572	6726468	sense	1
c1	Hcv1.av93.c1.g1108.i1	6725298	6726021	Hcv1.av93.c1.g1104.i1	6717572	6726468	sense	1
c1	Hcv1.av93.c1.g112.i1	873728	876547	Hcv1.av93.c1.g111.i1	869885	877189	antisense	2
c1	Hcv1.av93.c1.g112.i1	873728	876547	Hcv1.av93.c1.g111.i2	869885	877189	antisense	2
c1	Hcv1.av93.c1.g112.i2	873728	876547	Hcv1.av93.c1.g111.i1	869885	877189	antisense	2
c1	Hcv1.av93.c1.g112.i2	873728	876547	Hcv1.av93.c1.g111.i2	869885	877189	antisense	2
c1	Hcv1.av93.c1.g112.i3	873728	876547	Hcv1.av93.c1.g111.i1	869885	877189	antisense	2
c1	Hcv1.av93.c1.g112.i3	873728	876547	Hcv1.av93.c1.g111.i2	869885	877189	antisense	2
c1	Hcv1.av93.c1.g1120.i1	6790586	6802739	Hcv1.av93.c1.g1118.i1	6790400	6804009	antisense	8
c1	Hcv1.av93.c1.g1120.i1	6790586	6802739	Hcv1.av93.c1.g1119.i1	6790400	6806888	antisense	8
c1	Hcv1.av93.c1.g1121.i1	6805582	6806241	Hcv1.av93.c1.g1118.i1	6805124	6806888	sense	1
c1	Hcv1.av93.c1.g1121.i1	6805582	6806241	Hcv1.av93.c1.g1119.i1	6790400	6806888	sense	1
c1	Hcv1.av93.c1.g1121.i1	6805582	6806241	Hcv1.av93.c1.g1119.i2	6805124	6806888	sense	1
c1	Hcv1.av93.c1.g1121.i1	6805582	6806241	Hcv1.av93.c1.g1119.i3	6805124	6806888	sense	1
c1	Hcv1.av93.c1.g1125.i1	6822731	6823900	Hcv1.av93.c1.g1124.i1	6822496	6824126	sense	2
c1	Hcv1.av93.c1.g1126.i1	6828007	6829145	Hcv1.av93.c1.g1124.i1	6826930	6829220	antisense	1
c1	Hcv1.av93.c1.g1127.i1	6838159	6841448	Hcv1.av93.c1.g1124.i1	6837565	6841639	antisense	5
c1	Hcv1.av93.c1.g1128.i1	6842845	6843783	Hcv1.av93.c1.g1124.i1	6842386	6844058	antisense	1
c1	Hcv1.av93.c1.g1132.i1	6870198	6870829	Hcv1.av93.c1.g1131.i1	6868016	6877203	antisense	2
c1	Hcv1.av93.c1.g1132.i1	6870198	6870829	Hcv1.av93.c1.g1131.i3	6868016	6877203	antisense	2
c1	Hcv1.av93.c1.g1132.i1	6870198	6870829	Hcv1.av93.c1.g1131.i4	6868016	6877203	antisense	2
c1	Hcv1.av93.c1.g1132.i1	6870198	6870829	Hcv1.av93.c1.g1131.i5	6868016	6877203	antisense	2
c1	Hcv1.av93.c1.g1133.i1	6870996	6872226	Hcv1.av93.c1.g1131.i1	6868016	6877203	sense	4
c1	Hcv1.av93.c1.g1133.i1	6870996	6872226	Hcv1.av93.c1.g1131.i3	6868016	6877203	sense	4
c1	Hcv1.av93.c1.g1133.i1	6870996	6872226	Hcv1.av93.c1.g1131.i4	6868016	6877203	sense	4
c1	Hcv1.av93.c1.g1133.i1	6870996	6872226	Hcv1.av93.c1.g1131.i5	6868016	6877203	sense	4
c1	Hcv1.av93.c1.g1133.i2	6870996	6872226	Hcv1.av93.c1.g1131.i1	6868016	6877203	sense	2
c1	Hcv1.av93.c1.g1133.i2	6870996	6872226	Hcv1.av93.c1.g1131.i3	6868016	6877203	sense	2
c1	Hcv1.av93.c1.g1133.i2	6870996	6872226	Hcv1.av93.c1.g1131.i4	6868016	6877203	sense	2
c1	Hcv1.av93.c1.g1133.i2	6870996	6872226	Hcv1.av93.c1.g1131.i5	6868016	6877203	sense	2
c1	Hcv1.av93.c1.g1148.i1	6982394	6983267	Hcv1.av93.c1.g1147.i1	6981976	6984004	antisense	3
c1	Hcv1.av93.c1.g1156.i1	7054665	7055453	Hcv1.av93.c1.g1155.i4	7054405	7058860	antisense	1
c1	Hcv1.av93.c1.g116.i1	907675	907899	Hcv1.av93.c1.g115.i1	905511	909217	antisense	1
c1	Hcv1.av93.c1.g116.i1	907675	907899	Hcv1.av93.c1.g115.i5	905511	909217	antisense	1
c1	Hcv1.av93.c1.g1163.i1	7104671	7109945	Hcv1.av93.c1.g1162.i1	7104585	7110162	sense	2
c1	Hcv1.av93.c1.g1167.i1	7116292	7118342	Hcv1.av93.c1.g1166.i1	7114726	7134506	antisense	1
c1	Hcv1.av93.c1.g1168.i1	7118595	7122248	Hcv1.av93.c1.g1166.i1	7114726	7134506	antisense	1
c1	Hcv1.av93.c1.g1169.i1	7125027	7126695	Hcv1.av93.c1.g1166.i1	7114726	7134506	antisense	1
c1	Hcv1.av93.c1.g1170.i1	7127966	7128595	Hcv1.av93.c1.g1166.i1	7114726	7134506	antisense	1
c1	Hcv1.av93.c1.g1171.i1	7129432	7131339	Hcv1.av93.c1.g1166.i1	7114726	7134506	antisense	1
c1	Hcv1.av93.c1.g1172.i1	7136984	7141196	Hcv1.av93.c1.g1166.i1	7136311	7141420	antisense	2
c1	Hcv1.av93.c1.g1179.i1	7202995	7207102	Hcv1.av93.c1.g1177.i1	7202350	7207807	antisense	9
c1	Hcv1.av93.c1.g1179.i1	7202995	7207102	Hcv1.av93.c1.g1177.i2	7202350	7207807	antisense	9
c1	Hcv1.av93.c1.g1195.i1	7301161	7305471	Hcv1.av93.c1.g1194.i1	7299961	7307890	antisense	7
c1	Hcv1.av93.c1.g1195.i1	7301161	7305471	Hcv1.av93.c1.g1194.i2	7299961	7307890	antisense	7
c1	Hcv1.av93.c1.g1195.i1	7301161	7305471	Hcv1.av93.c1.g1194.i3	7299961	7307890	antisense	7
c1	Hcv1.av93.c1.g1195.i1	7301161	7305471	Hcv1.av93.c1.g1194.i4	7299961	7307890	antisense	7
c1	Hcv1.av93.c1.g1196.i1	7319489	7324332	Hcv1.av93.c1.g1194.i1	7318651	7324283	antisense	8
c1	Hcv1.av93.c1.g1196.i1	7319489	7324332	Hcv1.av93.c1.g1194.i2	7307952	7324283	antisense	8
c1	Hcv1.av93.c1.g1196.i1	7319489	7324332	Hcv1.av93.c1.g1194.i3	7307952	7324283	antisense	8
c1	Hcv1.av93.c1.g1196.i1	7319489	7324332	Hcv1.av93.c1.g1194.i4	7307952	7324283	antisense	8
c1	Hcv1.av93.c1.g1196.i2	7319489	7324332	Hcv1.av93.c1.g1194.i1	7318651	7324283	antisense	9
c1	Hcv1.av93.c1.g1196.i2	7319489	7324332	Hcv1.av93.c1.g1194.i2	7307952	7324283	antisense	9
c1	Hcv1.av93.c1.g1196.i2	7319489	7324332	Hcv1.av93.c1.g1194.i3	7307952	7324283	antisense	9
c1	Hcv1.av93.c1.g1196.i2	7319489	7324332	Hcv1.av93.c1.g1194.i4	7307952	7324283	antisense	9
c1	Hcv1.av93.c1.g1196.i3	7319489	7324332	Hcv1.av93.c1.g1194.i1	7318651	7324283	antisense	7
c1	Hcv1.av93.c1.g1196.i3	7319489	7324332	Hcv1.av93.c1.g1194.i2	7307952	7324283	antisense	7
c1	Hcv1.av93.c1.g1196.i3	7319489	7324332	Hcv1.av93.c1.g1194.i3	7307952	7324283	antisense	7
c1	Hcv1.av93.c1.g1196.i3	7319489	7324332	Hcv1.av93.c1.g1194.i4	7307952	7324283	antisense	7
c1	Hcv1.av93.c1.g1204.i1	7338234	7339634	Hcv1.av93.c1.g1203.i1	7337496	7339673	sense	3
c1	Hcv1.av93.c1.g1211.i1	7371104	7371813	Hcv1.av93.c1.g1209.i1	7363634	7373467	sense	1
c1	Hcv1.av93.c1.g1211.i1	7371104	7371813	Hcv1.av93.c1.g1210.i1	7366654	7375733	sense	1
c1	Hcv1.av93.c1.g1226.i1	7453580	7455030	Hcv1.av93.c1.g1225.i1	7452426	7462750	sense	1
c1	Hcv1.av93.c1.g1226.i1	7453580	7455030	Hcv1.av93.c1.g1225.i2	7452426	7462750	sense	1
c1	Hcv1.av93.c1.g1227.i1	7455088	7456146	Hcv1.av93.c1.g1225.i1	7452426	7462750	antisense	1
c1	Hcv1.av93.c1.g1227.i1	7455088	7456146	Hcv1.av93.c1.g1225.i2	7452426	7462750	antisense	1
c1	Hcv1.av93.c1.g1228.i1	7469210	7471736	Hcv1.av93.c1.g1225.i1	7464198	7472517	antisense	2
c1	Hcv1.av93.c1.g1228.i1	7469210	7471736	Hcv1.av93.c1.g1225.i2	7464198	7472517	antisense	2
c1	Hcv1.av93.c1.g1239.i1	7542705	7543829	Hcv1.av93.c1.g1237.i1	7537848	7551920	antisense	1
c1	Hcv1.av93.c1.g1239.i1	7542705	7543829	Hcv1.av93.c1.g1237.i2	7537848	7551920	antisense	1
c1	Hcv1.av93.c1.g1240.i1	7549393	7551897	Hcv1.av93.c1.g1237.i1	7537848	7551920	antisense	2
c1	Hcv1.av93.c1.g1240.i1	7549393	7551897	Hcv1.av93.c1.g1237.i2	7537848	7551920	antisense	2
c1	Hcv1.av93.c1.g1243.i1	7585657	7587442	Hcv1.av93.c1.g1242.i1	7580418	7587724	sense	1
c1	Hcv1.av93.c1.g1244.i1	7588098	7590471	Hcv1.av93.c1.g1242.i1	7587842	7590639	sense	1
c1	Hcv1.av93.c1.g1248.i1	7613812	7620650	Hcv1.av93.c1.g1247.i1	7610405	7620710	antisense	11
c1	Hcv1.av93.c1.g1249.i1	7623490	7624871	Hcv1.av93.c1.g1247.i1	7620901	7624957	antisense	1
c1	Hcv1.av93.c1.g1251.i1	7633626	7636938	Hcv1.av93.c1.g1250.i1	7632076	7636950	sense	1
c1	Hcv1.av93.c1.g1251.i1	7633626	7636938	Hcv1.av93.c1.g1250.i2	7632076	7636950	sense	1
c1	Hcv1.av93.c1.g1262.i1	7683599	7684585	Hcv1.av93.c1.g1261.i1	7683534	7685077	sense	1
c1	Hcv1.av93.c1.g1265.i1	7695372	7696335	Hcv1.av93.c1.g1264.i1	7694333	7696485	antisense	1
c1	Hcv1.av93.c1.g1280.i1	7756889	7758264	Hcv1.av93.c1.g1279.i1	7756750	7759812	sense	1
c1	Hcv1.av93.c1.g1280.i1	7756889	7758264	Hcv1.av93.c1.g1279.i2	7756750	7761441	sense	1
c1	Hcv1.av93.c1.g1281.i1	7778177	7788517	Hcv1.av93.c1.g1279.i1	7776376	7791107	antisense	10
c1	Hcv1.av93.c1.g1281.i1	7778177	7788517	Hcv1.av93.c1.g1279.i2	7776376	7791107	antisense	10
c1	Hcv1.av93.c1.g1281.i2	7778177	7787112	Hcv1.av93.c1.g1279.i1	7776376	7791107	antisense	7
c1	Hcv1.av93.c1.g1281.i2	7778177	7787112	Hcv1.av93.c1.g1279.i2	7776376	7791107	antisense	7
c1	Hcv1.av93.c1.g1319.i1	8001668	8003956	Hcv1.av93.c1.g1318.i1	7995109	8005831	sense	2
c1	Hcv1.av93.c1.g1323.i1	8027149	8028462	Hcv1.av93.c1.g1322.i1	8026925	8029363	antisense	3
c1	Hcv1.av93.c1.g1331.i1	8081938	8085679	Hcv1.av93.c1.g1330.i1	8068878	8086011	antisense	5
c1	Hcv1.av93.c1.g1337.i1	8162796	8164215	Hcv1.av93.c1.g1336.i1	8158190	8168247	antisense	1
c1	Hcv1.av93.c1.g1337.i1	8162796	8164215	Hcv1.av93.c1.g1336.i2	8158190	8168247	antisense	1
c1	Hcv1.av93.c1.g1337.i1	8162796	8164215	Hcv1.av93.c1.g1336.i3	8158190	8168247	antisense	1
c1	Hcv1.av93.c1.g1337.i1	8162796	8164215	Hcv1.av93.c1.g1336.i4	8158190	8168247	antisense	1
c1	Hcv1.av93.c1.g1337.i1	8162796	8164215	Hcv1.av93.c1.g1336.i5	8158190	8168247	antisense	1
c1	Hcv1.av93.c1.g1338.i1	8164868	8165299	Hcv1.av93.c1.g1336.i1	8158190	8168247	sense	1
c1	Hcv1.av93.c1.g1338.i1	8164868	8165299	Hcv1.av93.c1.g1336.i2	8158190	8168247	sense	1
c1	Hcv1.av93.c1.g1338.i1	8164868	8165299	Hcv1.av93.c1.g1336.i3	8158190	8168247	sense	1
c1	Hcv1.av93.c1.g1338.i1	8164868	8165299	Hcv1.av93.c1.g1336.i4	8158190	8168247	sense	1
c1	Hcv1.av93.c1.g1338.i1	8164868	8165299	Hcv1.av93.c1.g1336.i5	8158190	8168247	sense	1
c1	Hcv1.av93.c1.g1350.i1	8264979	8268470	Hcv1.av93.c1.g1347.i1	8261075	8278918	antisense	4
c1	Hcv1.av93.c1.g1350.i2	8264979	8268993	Hcv1.av93.c1.g1347.i1	8261075	8278918	antisense	5
c1	Hcv1.av93.c1.g1351.i1	8270245	8274842	Hcv1.av93.c1.g1347.i1	8261075	8278918	antisense	7
c1	Hcv1.av93.c1.g1352.i1	8287610	8292334	Hcv1.av93.c1.g1347.i1	8287691	8292955	antisense	1
c1	Hcv1.av93.c1.g1363.i1	8357800	8360162	Hcv1.av93.c1.g1356.i2	8356730	8361593	antisense	1
c1	Hcv1.av93.c1.g1373.i1	8419034	8420119	Hcv1.av93.c1.g1372.i1	8417941	8420151	antisense	2
c1	Hcv1.av93.c1.g1373.i1	8419034	8420119	Hcv1.av93.c1.g1372.i2	8417941	8420151	antisense	2
c1	Hcv1.av93.c1.g1394.i1	8523316	8534368	Hcv1.av93.c1.g1393.i1	8523226	8533597	antisense	8
c1	Hcv1.av93.c1.g1395.i1	8526175	8528116	Hcv1.av93.c1.g1393.i1	8523226	8533597	sense	4
c1	Hcv1.av93.c1.g1395.i1	8526175	8528116	Hcv1.av93.c1.g1394.i1	8524053	8532611	antisense	4
c1	Hcv1.av93.c1.g1397.i1	8538848	8540335	Hcv1.av93.c1.g1396.i1	8538332	8540469	antisense	4
c1	Hcv1.av93.c1.g1397.i1	8538848	8540335	Hcv1.av93.c1.g1396.i2	8538332	8540469	antisense	4
c1	Hcv1.av93.c1.g1397.i1	8538848	8540335	Hcv1.av93.c1.g1396.i3	8538332	8540469	antisense	4
c1	Hcv1.av93.c1.g1397.i2	8539114	8540335	Hcv1.av93.c1.g1396.i1	8538332	8540469	antisense	3
c1	Hcv1.av93.c1.g1397.i2	8539114	8540335	Hcv1.av93.c1.g1396.i2	8538332	8540469	antisense	3
c1	Hcv1.av93.c1.g1397.i2	8539114	8540335	Hcv1.av93.c1.g1396.i3	8538332	8540469	antisense	3
c1	Hcv1.av93.c1.g1405.i1	8586197	8586738	Hcv1.av93.c1.g1404.i2	8585561	8590485	antisense	1
c1	Hcv1.av93.c1.g1406.i1	8587726	8589099	Hcv1.av93.c1.g1404.i2	8585561	8590485	sense	1
c1	Hcv1.av93.c1.g1418.i1	8697306	8698648	Hcv1.av93.c1.g1417.i1	8696982	8698878	antisense	1
c1	Hcv1.av93.c1.g1418.i1	8697306	8698648	Hcv1.av93.c1.g1417.i2	8696982	8698878	antisense	1
c1	Hcv1.av93.c1.g1423.i1	8725224	8733976	Hcv1.av93.c1.g1422.i1	8717245	8733858	antisense	8
c1	Hcv1.av93.c1.g1425.i1	8743349	8744450	Hcv1.av93.c1.g1424.i1	8743334	8744607	antisense	4
c1	Hcv1.av93.c1.g1427.i1	8773833	8774143	Hcv1.av93.c1.g1426.i1	8773248	8775159	antisense	1
c1	Hcv1.av93.c1.g1427.i1	8773833	8774143	Hcv1.av93.c1.g1426.i2	8773248	8775159	antisense	1
c1	Hcv1.av93.c1.g1437.i1	8824941	8825795	Hcv1.av93.c1.g1436.i1	8824495	8826040	antisense	1
c1	Hcv1.av93.c1.g1439.i1	8838546	8841474	Hcv1.av93.c1.g1438.i1	8838426	8842413	antisense	1
c1	Hcv1.av93.c1.g1439.i1	8838546	8841474	Hcv1.av93.c1.g1438.i2	8838426	8842413	antisense	1
c1	Hcv1.av93.c1.g144.i1	1042567	1043817	Hcv1.av93.c1.g143.i1	1042523	1043926	antisense	2
c1	Hcv1.av93.c1.g1445.i1	8863416	8864562	Hcv1.av93.c1.g1444.i1	8863276	8866632	antisense	3
c1	Hcv1.av93.c1.g1445.i1	8863416	8864562	Hcv1.av93.c1.g1444.i2	8863276	8866632	antisense	3
c1	Hcv1.av93.c1.g1445.i1	8863416	8864562	Hcv1.av93.c1.g1444.i3	8863276	8866632	antisense	3
c1	Hcv1.av93.c1.g145.i1	1044225	1046666	Hcv1.av93.c1.g143.i1	1044027	1046756	sense	2
c1	Hcv1.av93.c1.g145.i2	1044225	1046666	Hcv1.av93.c1.g143.i1	1044027	1046756	sense	3
c1	Hcv1.av93.c1.g145.i3	1044225	1046666	Hcv1.av93.c1.g143.i1	1044027	1046756	sense	3
c1	Hcv1.av93.c1.g1454.i1	8917445	8918769	Hcv1.av93.c1.g1453.i1	8917371	8918824	sense	1
c1	Hcv1.av93.c1.g1454.i1	8917445	8918769	Hcv1.av93.c1.g1453.i2	8917371	8918824	sense	1
c1	Hcv1.av93.c1.g147.i1	1055956	1057445	Hcv1.av93.c1.g146.i1	1055007	1057413	antisense	1
c1	Hcv1.av93.c1.g1475.i1	8994685	8996241	Hcv1.av93.c1.g1474.i1	8994646	8996683	antisense	5
c1	Hcv1.av93.c1.g1489.i1	9061532	9062198	Hcv1.av93.c1.g1488.i1	9060751	9064374	antisense	1
c1	Hcv1.av93.c1.g1489.i1	9061532	9062198	Hcv1.av93.c1.g1488.i2	9060751	9064374	antisense	1
c1	Hcv1.av93.c1.g1491.i1	9070811	9073367	Hcv1.av93.c1.g1490.i1	9070985	9073562	antisense	2
c1	Hcv1.av93.c1.g1504.i1	9173133	9174925	Hcv1.av93.c1.g1503.i1	9173140	9177448	antisense	1
c1	Hcv1.av93.c1.g1521.i1	9256426	9259489	Hcv1.av93.c1.g1520.i1	9256224	9260917	antisense	1
c1	Hcv1.av93.c1.g1521.i1	9256426	9259489	Hcv1.av93.c1.g1520.i2	9256224	9260917	antisense	1
c1	Hcv1.av93.c1.g1524.i1	9290358	9290696	Hcv1.av93.c1.g1523.i1	9280491	9292006	sense	1
c1	Hcv1.av93.c1.g1524.i1	9290358	9290696	Hcv1.av93.c1.g1523.i2	9280491	9292006	sense	1
c1	Hcv1.av93.c1.g1526.i1	9315138	9317196	Hcv1.av93.c1.g1525.i1	9314524	9317382	antisense	1
c1	Hcv1.av93.c1.g1550.i1	9419571	9420436	Hcv1.av93.c1.g1549.i1	9419067	9420743	sense	1
c1	Hcv1.av93.c1.g1558.i1	9490043	9491280	Hcv1.av93.c1.g1557.i1	9489333	9492589	antisense	1
c1	Hcv1.av93.c1.g1564.i1	9557794	9559224	Hcv1.av93.c1.g1563.i1	9557622	9559337	sense	1
c1	Hcv1.av93.c1.g1564.i1	9557794	9559224	Hcv1.av93.c1.g1563.i2	9557622	9559337	sense	1
c1	Hcv1.av93.c1.g1570.i1	9589133	9591061	Hcv1.av93.c1.g1569.i1	9587897	9591225	antisense	2
c1	Hcv1.av93.c1.g1570.i1	9589133	9591061	Hcv1.av93.c1.g1569.i2	9587897	9591225	antisense	2
c1	Hcv1.av93.c1.g1590.i1	9748420	9749500	Hcv1.av93.c1.g1589.i1	9748385	9758591	antisense	1
c1	Hcv1.av93.c1.g1591.i1	9748442	9751068	Hcv1.av93.c1.g1589.i1	9748385	9758591	sense	2
c1	Hcv1.av93.c1.g1607.i1	9853107	9853997	Hcv1.av93.c1.g1606.i1	9852809	9854469	sense	1
c1	Hcv1.av93.c1.g1609.i1	9864729	9869500	Hcv1.av93.c1.g1608.i1	9864378	9872151	antisense	3
c1	Hcv1.av93.c1.g162.i1	1115601	1116587	Hcv1.av93.c1.g161.i1	1115426	1119463	sense	2
c1	Hcv1.av93.c1.g162.i1	1115601	1116587	Hcv1.av93.c1.g161.i2	1115426	1119463	sense	2
c1	Hcv1.av93.c1.g1621.i1	9942746	9946615	Hcv1.av93.c1.g1620.i1	9942798	9947412	antisense	4
c1	Hcv1.av93.c1.g1641.i1	10032163	10035655	Hcv1.av93.c1.g1640.i1	10026084	10037265	sense	1
c1	Hcv1.av93.c1.g1658.i1	10126279	10127666	Hcv1.av93.c1.g1657.i1	10123935	10129829	sense	2
c1	Hcv1.av93.c1.g1661.i1	10152167	10153986	Hcv1.av93.c1.g1660.i2	10148440	10154153	antisense	3
c1	Hcv1.av93.c1.g1674.i1	10207261	10208337	Hcv1.av93.c1.g1673.i1	10207134	10208441	sense	1
c1	Hcv1.av93.c1.g1674.i1	10207261	10208337	Hcv1.av93.c1.g1673.i2	10207134	10208441	sense	1
c1	Hcv1.av93.c1.g1675.i1	10210534	10213699	Hcv1.av93.c1.g1673.i1	10210218	10213744	sense	4
c1	Hcv1.av93.c1.g1675.i1	10210534	10213699	Hcv1.av93.c1.g1673.i2	10210044	10213763	sense	4
c1	Hcv1.av93.c1.g1677.i1	10227748	10228505	Hcv1.av93.c1.g1676.i3	10218375	10234028	antisense	1
c1	Hcv1.av93.c1.g1681.i1	10249581	10250857	Hcv1.av93.c1.g1680.i1	10249126	10251981	antisense	4
c1	Hcv1.av93.c1.g1691.i1	10290808	10291540	Hcv1.av93.c1.g1690.i1	10290490	10291780	antisense	1
c1	Hcv1.av93.c1.g1696.i1	10317481	10321629	Hcv1.av93.c1.g1695.i1	10317369	10322566	antisense	3
c1	Hcv1.av93.c1.g1696.i1	10317481	10321629	Hcv1.av93.c1.g1695.i2	10317369	10322566	antisense	3
c1	Hcv1.av93.c1.g1697.i1	10317523	10321629	Hcv1.av93.c1.g1695.i1	10317369	10322566	antisense	3
c1	Hcv1.av93.c1.g1697.i1	10317523	10321629	Hcv1.av93.c1.g1695.i2	10317369	10322566	antisense	3
c1	Hcv1.av93.c1.g1704.i1	10349219	10357652	Hcv1.av93.c1.g1703.i1	10347043	10358032	antisense	6
c1	Hcv1.av93.c1.g1704.i2	10353781	10357652	Hcv1.av93.c1.g1703.i1	10347043	10358032	antisense	6
c1	Hcv1.av93.c1.g1705.i1	10356314	10357895	Hcv1.av93.c1.g1703.i1	10347043	10358032	sense	1
c1	Hcv1.av93.c1.g1712.i1	10396342	10396668	Hcv1.av93.c1.g1711.i1	10394765	10400392	antisense	1
c1	Hcv1.av93.c1.g1712.i1	10396342	10396668	Hcv1.av93.c1.g1711.i2	10394765	10400392	antisense	1
c1	Hcv1.av93.c1.g172.i1	1161787	1162714	Hcv1.av93.c1.g171.i1	1160879	1170970	sense	1
c1	Hcv1.av93.c1.g172.i1	1161787	1162714	Hcv1.av93.c1.g171.i2	1160918	1170970	sense	1
c1	Hcv1.av93.c1.g1723.i1	10485999	10488417	Hcv1.av93.c1.g1722.i1	10484522	10494842	antisense	1
c1	Hcv1.av93.c1.g1724.i1	10491514	10494530	Hcv1.av93.c1.g1722.i1	10484522	10494842	antisense	2
c1	Hcv1.av93.c1.g173.i1	1167305	1169047	Hcv1.av93.c1.g171.i1	1160879	1170970	sense	1
c1	Hcv1.av93.c1.g173.i1	1167305	1169047	Hcv1.av93.c1.g171.i2	1160918	1170970	sense	1
c1	Hcv1.av93.c1.g187.i1	1280559	1286071	Hcv1.av93.c1.g182.i1	1275528	1288980	sense	2
c1	Hcv1.av93.c1.g187.i2	1280559	1286071	Hcv1.av93.c1.g182.i1	1275528	1288980	sense	5
c1	Hcv1.av93.c1.g187.i3	1280559	1286071	Hcv1.av93.c1.g182.i1	1275528	1288980	sense	4
c1	Hcv1.av93.c1.g194.i1	1322019	1322903	Hcv1.av93.c1.g193.i1	1321713	1323035	sense	1
c1	Hcv1.av93.c1.g197.i1	1343419	1343976	Hcv1.av93.c1.g196.i1	1341692	1346744	antisense	2
c1	Hcv1.av93.c1.g197.i1	1343419	1343976	Hcv1.av93.c1.g196.i2	1341692	1346744	antisense	2
c1	Hcv1.av93.c1.g198.i1	1344065	1344502	Hcv1.av93.c1.g196.i1	1341692	1346744	antisense	1
c1	Hcv1.av93.c1.g198.i1	1344065	1344502	Hcv1.av93.c1.g196.i2	1341692	1346744	antisense	1
c1	Hcv1.av93.c1.g21.i1	176858	177538	Hcv1.av93.c1.g17.i1	172926	193391	antisense	1
c1	Hcv1.av93.c1.g215.i1	1441203	1441552	Hcv1.av93.c1.g214.i1	1441120	1441755	sense	1
c1	Hcv1.av93.c1.g215.i1	1441203	1441552	Hcv1.av93.c1.g214.i2	1441120	1441755	sense	1
c1	Hcv1.av93.c1.g219.i1	1465722	1478146	Hcv1.av93.c1.g218.i1	1464629	1478357	antisense	13
c1	Hcv1.av93.c1.g219.i1	1465722	1478146	Hcv1.av93.c1.g218.i2	1464629	1478357	antisense	13
c1	Hcv1.av93.c1.g22.i1	186029	186885	Hcv1.av93.c1.g17.i1	172926	193391	antisense	1
c1	Hcv1.av93.c1.g248.i1	1610971	1613144	Hcv1.av93.c1.g247.i1	1610257	1613313	antisense	1
c1	Hcv1.av93.c1.g248.i1	1610971	1613144	Hcv1.av93.c1.g247.i2	1610257	1613313	antisense	1
c1	Hcv1.av93.c1.g248.i1	1610971	1613144	Hcv1.av93.c1.g247.i3	1610257	1613313	antisense	1
c1	Hcv1.av93.c1.g25.i1	210501	212710	Hcv1.av93.c1.g24.i1	208028	217007	sense	2
c1	Hcv1.av93.c1.g250.i1	1620091	1621696	Hcv1.av93.c1.g249.i1	1619722	1628979	antisense	2
c1	Hcv1.av93.c1.g251.i1	1621758	1626441	Hcv1.av93.c1.g249.i1	1619722	1628979	antisense	2
c1	Hcv1.av93.c1.g252.i1	1627252	1628922	Hcv1.av93.c1.g249.i1	1619722	1628979	antisense	2
c1	Hcv1.av93.c1.g261.i1	1666757	1667474	Hcv1.av93.c1.g260.i1	1663769	1668361	antisense	1
c1	Hcv1.av93.c1.g261.i1	1666757	1667474	Hcv1.av93.c1.g260.i2	1663769	1668361	antisense	1
c1	Hcv1.av93.c1.g263.i1	1685957	1689306	Hcv1.av93.c1.g262.i1	1685210	1695875	antisense	2
c1	Hcv1.av93.c1.g264.i1	1693897	1695154	Hcv1.av93.c1.g262.i1	1685210	1695875	antisense	1
c1	Hcv1.av93.c1.g267.i1	1728967	1738030	Hcv1.av93.c1.g242.i1	1728916	1738221	antisense	27
c1	Hcv1.av93.c1.g267.i1	1728967	1738030	Hcv1.av93.c1.g242.i2	1728916	1738221	antisense	27
c1	Hcv1.av93.c1.g267.i1	1728967	1738030	Hcv1.av93.c1.g242.i3	1728916	1738221	antisense	27
c1	Hcv1.av93.c1.g267.i1	1728967	1738030	Hcv1.av93.c1.g242.i4	1728916	1738221	antisense	27
c1	Hcv1.av93.c1.g267.i1	1728967	1738030	Hcv1.av93.c1.g242.i5	1728916	1738221	antisense	27
c1	Hcv1.av93.c1.g279.i1	1808434	1809095	Hcv1.av93.c1.g278.i2	1807863	1810817	antisense	1
c1	Hcv1.av93.c1.g279.i1	1808434	1809095	Hcv1.av93.c1.g278.i3	1807863	1810817	antisense	1
c1	Hcv1.av93.c1.g283.i1	1831826	1833984	Hcv1.av93.c1.g282.i2	1830864	1833760	antisense	5
c1	Hcv1.av93.c1.g298.i1	1889547	1891252	Hcv1.av93.c1.g297.i1	1889425	1891470	antisense	1
c1	Hcv1.av93.c1.g301.i1	1900622	1901981	Hcv1.av93.c1.g302.i1	1900439	1907612	antisense	6
c1	Hcv1.av93.c1.g301.i1	1900622	1901981	Hcv1.av93.c1.g302.i2	1900439	1907612	antisense	6
c1	Hcv1.av93.c1.g315.i1	2006051	2006533	Hcv1.av93.c1.g314.i1	2004670	2008344	sense	1
c1	Hcv1.av93.c1.g317.i1	2020801	2026536	Hcv1.av93.c1.g316.i1	2020441	2028355	antisense	9
c1	Hcv1.av93.c1.g317.i2	2020801	2026536	Hcv1.av93.c1.g316.i1	2020441	2028355	antisense	8
c1	Hcv1.av93.c1.g322.i1	2054770	2062967	Hcv1.av93.c1.g321.i1	2054461	2063094	antisense	6
c1	Hcv1.av93.c1.g322.i1	2054770	2062967	Hcv1.av93.c1.g321.i2	2054461	2063094	antisense	6
c1	Hcv1.av93.c1.g325.i1	2074491	2077000	Hcv1.av93.c1.g324.i1	2073635	2077091	antisense	1
c1	Hcv1.av93.c1.g325.i1	2074491	2077000	Hcv1.av93.c1.g324.i2	2073635	2077091	antisense	1
c1	Hcv1.av93.c1.g329.i1	2100338	2101966	Hcv1.av93.c1.g328.i1	2098881	2102039	antisense	2
c1	Hcv1.av93.c1.g329.i2	2100338	2101967	Hcv1.av93.c1.g328.i1	2098881	2102039	antisense	2
c1	Hcv1.av93.c1.g335.i1	2131707	2136982	Hcv1.av93.c1.g334.i1	2129377	2136939	antisense	6
c1	Hcv1.av93.c1.g335.i1	2131707	2136982	Hcv1.av93.c1.g334.i2	2129377	2136939	antisense	6
c1	Hcv1.av93.c1.g335.i1	2131707	2136982	Hcv1.av93.c1.g334.i3	2129377	2136939	antisense	6
c1	Hcv1.av93.c1.g345.i1	2186663	2187880	Hcv1.av93.c1.g344.i1	2186521	2188153	antisense	1
c1	Hcv1.av93.c1.g345.i1	2186663	2187880	Hcv1.av93.c1.g344.i2	2186521	2188153	antisense	1
c1	Hcv1.av93.c1.g345.i1	2186663	2187880	Hcv1.av93.c1.g344.i3	2186521	2188153	antisense	1
c1	Hcv1.av93.c1.g346.i1	2199445	2202214	Hcv1.av93.c1.g344.i1	2198928	2207837	antisense	2
c1	Hcv1.av93.c1.g346.i1	2199445	2202214	Hcv1.av93.c1.g344.i2	2198928	2207837	antisense	2
c1	Hcv1.av93.c1.g346.i1	2199445	2202214	Hcv1.av93.c1.g344.i3	2198928	2207837	antisense	2
c1	Hcv1.av93.c1.g346.i1	2199445	2202214	Hcv1.av93.c1.g344.i4	2198928	2207837	antisense	2
c1	Hcv1.av93.c1.g346.i2	2199445	2202214	Hcv1.av93.c1.g344.i1	2198928	2207837	antisense	3
c1	Hcv1.av93.c1.g346.i2	2199445	2202214	Hcv1.av93.c1.g344.i2	2198928	2207837	antisense	3
c1	Hcv1.av93.c1.g346.i2	2199445	2202214	Hcv1.av93.c1.g344.i3	2198928	2207837	antisense	3
c1	Hcv1.av93.c1.g346.i2	2199445	2202214	Hcv1.av93.c1.g344.i4	2198928	2207837	antisense	3
c1	Hcv1.av93.c1.g347.i1	2203312	2204757	Hcv1.av93.c1.g344.i1	2198928	2207837	antisense	2
c1	Hcv1.av93.c1.g347.i1	2203312	2204757	Hcv1.av93.c1.g344.i2	2198928	2207837	antisense	2
c1	Hcv1.av93.c1.g347.i1	2203312	2204757	Hcv1.av93.c1.g344.i3	2198928	2207837	antisense	2
c1	Hcv1.av93.c1.g347.i1	2203312	2204757	Hcv1.av93.c1.g344.i4	2198928	2207837	antisense	2
c1	Hcv1.av93.c1.g348.i1	2206084	2207566	Hcv1.av93.c1.g344.i1	2198928	2207837	antisense	2
c1	Hcv1.av93.c1.g348.i1	2206084	2207566	Hcv1.av93.c1.g344.i2	2198928	2207837	antisense	2
c1	Hcv1.av93.c1.g348.i1	2206084	2207566	Hcv1.av93.c1.g344.i3	2198928	2207837	antisense	2
c1	Hcv1.av93.c1.g348.i1	2206084	2207566	Hcv1.av93.c1.g344.i4	2198928	2207837	antisense	2
c1	Hcv1.av93.c1.g361.i1	2290800	2293424	Hcv1.av93.c1.g360.i1	2290370	2293675	antisense	3
c1	Hcv1.av93.c1.g361.i1	2290800	2293424	Hcv1.av93.c1.g360.i2	2290370	2293675	antisense	3
c1	Hcv1.av93.c1.g372.i1	2332247	2332973	Hcv1.av93.c1.g370.i1	2323798	2333732	antisense	1
c1	Hcv1.av93.c1.g372.i1	2332247	2332973	Hcv1.av93.c1.g370.i2	2324456	2333732	antisense	1
c1	Hcv1.av93.c1.g372.i1	2332247	2332973	Hcv1.av93.c1.g370.i3	2324456	2333732	antisense	1
c1	Hcv1.av93.c1.g372.i1	2332247	2332973	Hcv1.av93.c1.g371.i1	2323798	2333732	antisense	1
c1	Hcv1.av93.c1.g376.i1	2346261	2347209	Hcv1.av93.c1.g375.i1	2345897	2347285	sense	1
c1	Hcv1.av93.c1.g376.i1	2346261	2347209	Hcv1.av93.c1.g375.i2	2345897	2347285	sense	1
c1	Hcv1.av93.c1.g376.i1	2346261	2347209	Hcv1.av93.c1.g375.i3	2345897	2347285	sense	1
c1	Hcv1.av93.c1.g389.i1	2430748	2431667	Hcv1.av93.c1.g388.i1	2430477	2432160	antisense	1
c1	Hcv1.av93.c1.g40.i1	272881	275700	Hcv1.av93.c1.g39.i1	264327	283404	sense	1
c1	Hcv1.av93.c1.g40.i1	272881	275700	Hcv1.av93.c1.g39.i2	262057	278640	sense	1
c1	Hcv1.av93.c1.g40.i1	272881	275700	Hcv1.av93.c1.g39.i3	264327	283404	sense	1
c1	Hcv1.av93.c1.g40.i1	272881	275700	Hcv1.av93.c1.g39.i4	262057	278640	sense	1
c1	Hcv1.av93.c1.g41.i1	273710	282049	Hcv1.av93.c1.g39.i1	264327	283404	antisense	2
c1	Hcv1.av93.c1.g41.i1	273710	282049	Hcv1.av93.c1.g39.i3	264327	283404	antisense	2
c1	Hcv1.av93.c1.g413.i1	2576823	2578797	Hcv1.av93.c1.g412.i2	2573516	2579002	antisense	1
c1	Hcv1.av93.c1.g43.i1	284904	287236	Hcv1.av93.c1.g39.i1	283490	286946	antisense	2
c1	Hcv1.av93.c1.g43.i1	284904	287236	Hcv1.av93.c1.g39.i2	283490	286946	antisense	2
c1	Hcv1.av93.c1.g43.i1	284904	287236	Hcv1.av93.c1.g39.i3	283490	286946	antisense	2
c1	Hcv1.av93.c1.g43.i1	284904	287236	Hcv1.av93.c1.g39.i4	283490	286946	antisense	2
c1	Hcv1.av93.c1.g436.i1	2704319	2704513	Hcv1.av93.c1.g435.i1	2704259	2704609	sense	1
c1	Hcv1.av93.c1.g445.i1	2765386	2767068	Hcv1.av93.c1.g443.i1	2762111	2767261	antisense	3
c1	Hcv1.av93.c1.g445.i1	2765386	2767068	Hcv1.av93.c1.g443.i2	2762111	2767261	antisense	3
c1	Hcv1.av93.c1.g445.i1	2765386	2767068	Hcv1.av93.c1.g443.i3	2762111	2767261	antisense	3
c1	Hcv1.av93.c1.g451.i1	2805770	2807474	Hcv1.av93.c1.g450.i1	2805521	2807659	sense	2
c1	Hcv1.av93.c1.g452.i5	2811654	2813261	Hcv1.av93.c1.g453.i1	2811632	2821541	antisense	1
c1	Hcv1.av93.c1.g452.i5	2811654	2813261	Hcv1.av93.c1.g453.i2	2811632	2821541	antisense	1
c1	Hcv1.av93.c1.g452.i5	2811654	2813261	Hcv1.av93.c1.g453.i3	2811632	2821541	antisense	1
c1	Hcv1.av93.c1.g454.i1	2816845	2818741	Hcv1.av93.c1.g453.i1	2811632	2821541	antisense	6
c1	Hcv1.av93.c1.g454.i1	2816845	2818741	Hcv1.av93.c1.g453.i2	2811632	2821541	antisense	6
c1	Hcv1.av93.c1.g454.i1	2816845	2818741	Hcv1.av93.c1.g453.i3	2811632	2821541	antisense	6
c1	Hcv1.av93.c1.g455.i1	2820910	2821281	Hcv1.av93.c1.g453.i1	2811632	2821541	antisense	1
c1	Hcv1.av93.c1.g455.i1	2820910	2821281	Hcv1.av93.c1.g453.i2	2811632	2821541	antisense	1
c1	Hcv1.av93.c1.g455.i1	2820910	2821281	Hcv1.av93.c1.g453.i3	2811632	2821541	antisense	1
c1	Hcv1.av93.c1.g456.i1	2821927	2823892	Hcv1.av93.c1.g453.i1	2821707	2824230	antisense	5
c1	Hcv1.av93.c1.g456.i1	2821927	2823892	Hcv1.av93.c1.g453.i2	2821707	2824230	antisense	5
c1	Hcv1.av93.c1.g456.i1	2821927	2823892	Hcv1.av93.c1.g453.i3	2821707	2824230	antisense	5
c1	Hcv1.av93.c1.g463.i14	2877636	2879642	Hcv1.av93.c1.g462.i3	2875240	2880103	sense	1
c1	Hcv1.av93.c1.g463.i14	2877636	2879642	Hcv1.av93.c1.g463.i3	2875240	2880103	sense	1
c1	Hcv1.av93.c1.g463.i14	2877636	2879642	Hcv1.av93.c1.g463.i4	2875240	2880103	sense	1
c1	Hcv1.av93.c1.g463.i14	2877636	2879642	Hcv1.av93.c1.g463.i5	2875240	2880103	sense	1
c1	Hcv1.av93.c1.g463.i14	2877636	2879642	Hcv1.av93.c1.g463.i6	2875240	2880103	sense	1
c1	Hcv1.av93.c1.g463.i14	2877636	2879642	Hcv1.av93.c1.g463.i9	2875240	2880103	sense	1
c1	Hcv1.av93.c1.g463.i14	2877636	2879642	Hcv1.av93.c1.g463.i10	2875240	2880103	sense	1
c1	Hcv1.av93.c1.g463.i14	2877636	2879642	Hcv1.av93.c1.g463.i11	2875240	2880103	sense	1
c1	Hcv1.av93.c1.g463.i14	2877636	2879642	Hcv1.av93.c1.g463.i12	2875240	2880103	sense	1
c1	Hcv1.av93.c1.g463.i14	2877636	2879642	Hcv1.av93.c1.g463.i13	2875240	2880103	sense	1
c1	Hcv1.av93.c1.g463.i15	2877672	2879745	Hcv1.av93.c1.g462.i3	2875240	2880103	sense	2
c1	Hcv1.av93.c1.g463.i15	2877672	2879745	Hcv1.av93.c1.g463.i3	2875240	2880103	sense	2
c1	Hcv1.av93.c1.g463.i15	2877672	2879745	Hcv1.av93.c1.g463.i4	2875240	2880103	sense	2
c1	Hcv1.av93.c1.g463.i15	2877672	2879745	Hcv1.av93.c1.g463.i5	2875240	2880103	sense	2
c1	Hcv1.av93.c1.g463.i15	2877672	2879745	Hcv1.av93.c1.g463.i6	2875240	2880103	sense	2
c1	Hcv1.av93.c1.g463.i15	2877672	2879745	Hcv1.av93.c1.g463.i9	2875240	2880103	sense	2
c1	Hcv1.av93.c1.g463.i15	2877672	2879745	Hcv1.av93.c1.g463.i10	2875240	2880103	sense	2
c1	Hcv1.av93.c1.g463.i15	2877672	2879745	Hcv1.av93.c1.g463.i11	2875240	2880103	sense	2
c1	Hcv1.av93.c1.g463.i15	2877672	2879745	Hcv1.av93.c1.g463.i12	2875240	2880103	sense	2
c1	Hcv1.av93.c1.g463.i15	2877672	2879745	Hcv1.av93.c1.g463.i13	2875240	2880103	sense	2
c1	Hcv1.av93.c1.g472.i1	2938172	2942040	Hcv1.av93.c1.g467.i1	2935445	2945148	sense	2
c1	Hcv1.av93.c1.g472.i1	2938172	2942040	Hcv1.av93.c1.g467.i2	2935445	2945148	sense	2
c1	Hcv1.av93.c1.g473.i1	2943249	2944325	Hcv1.av93.c1.g467.i1	2935445	2945148	sense	2
c1	Hcv1.av93.c1.g473.i1	2943249	2944325	Hcv1.av93.c1.g467.i2	2935445	2945148	sense	2
c1	Hcv1.av93.c1.g480.i1	2982993	2985665	Hcv1.av93.c1.g479.i1	2974933	2987672	sense	1
c1	Hcv1.av93.c1.g480.i1	2982993	2985665	Hcv1.av93.c1.g479.i2	2978696	2987672	sense	1
c1	Hcv1.av93.c1.g480.i1	2982993	2985665	Hcv1.av93.c1.g479.i3	2979642	2987672	sense	1
c1	Hcv1.av93.c1.g480.i1	2982993	2985665	Hcv1.av93.c1.g479.i4	2980065	2987672	sense	1
c1	Hcv1.av93.c1.g481.i1	2988334	2991590	Hcv1.av93.c1.g479.i1	2988122	2995854	antisense	3
c1	Hcv1.av93.c1.g481.i1	2988334	2991590	Hcv1.av93.c1.g479.i2	2988122	2995854	antisense	3
c1	Hcv1.av93.c1.g481.i1	2988334	2991590	Hcv1.av93.c1.g479.i3	2988122	2995854	antisense	3
c1	Hcv1.av93.c1.g481.i1	2988334	2991590	Hcv1.av93.c1.g479.i4	2988122	2995854	antisense	3
c1	Hcv1.av93.c1.g481.i1	2988334	2991590	Hcv1.av93.c1.g479.i5	2988122	2995854	antisense	3
c1	Hcv1.av93.c1.g482.i1	2996294	2997047	Hcv1.av93.c1.g479.i1	2996267	2998349	antisense	1
c1	Hcv1.av93.c1.g482.i1	2996294	2997047	Hcv1.av93.c1.g479.i2	2996267	2998349	antisense	1
c1	Hcv1.av93.c1.g482.i1	2996294	2997047	Hcv1.av93.c1.g479.i3	2996267	2998349	antisense	1
c1	Hcv1.av93.c1.g482.i1	2996294	2997047	Hcv1.av93.c1.g479.i4	2996267	2998349	antisense	1
c1	Hcv1.av93.c1.g482.i1	2996294	2997047	Hcv1.av93.c1.g479.i5	2996267	2998349	antisense	1
c1	Hcv1.av93.c1.g483.i1	2996294	2997773	Hcv1.av93.c1.g479.i1	2996267	2998349	antisense	1
c1	Hcv1.av93.c1.g483.i1	2996294	2997773	Hcv1.av93.c1.g479.i2	2996267	2998349	antisense	1
c1	Hcv1.av93.c1.g483.i1	2996294	2997773	Hcv1.av93.c1.g479.i3	2996267	2998349	antisense	1
c1	Hcv1.av93.c1.g483.i1	2996294	2997773	Hcv1.av93.c1.g479.i4	2996267	2998349	antisense	1
c1	Hcv1.av93.c1.g483.i1	2996294	2997773	Hcv1.av93.c1.g479.i5	2996267	2998349	antisense	1
c1	Hcv1.av93.c1.g49.i1	320643	321569	Hcv1.av93.c1.g48.i1	315112	325258	sense	1
c1	Hcv1.av93.c1.g49.i1	320643	321569	Hcv1.av93.c1.g48.i2	315112	325258	sense	1
c1	Hcv1.av93.c1.g49.i1	320643	321569	Hcv1.av93.c1.g48.i3	315112	325258	sense	1
c1	Hcv1.av93.c1.g49.i1	320643	321569	Hcv1.av93.c1.g48.i4	315112	325258	sense	1
c1	Hcv1.av93.c1.g492.i1	3043773	3049380	Hcv1.av93.c1.g491.i1	3041887	3051091	antisense	6
c1	Hcv1.av93.c1.g524.i1	3270174	3271529	Hcv1.av93.c1.g523.i1	3265639	3275054	sense	1
c1	Hcv1.av93.c1.g527.i1	3280046	3282715	Hcv1.av93.c1.g526.i1	3280024	3283061	sense	3
c1	Hcv1.av93.c1.g529.i1	3284384	3287423	Hcv1.av93.c1.g527.i2	3283058	3293675	antisense	4
c1	Hcv1.av93.c1.g529.i1	3284384	3287423	Hcv1.av93.c1.g528.i1	3282885	3293817	sense	4
c1	Hcv1.av93.c1.g53.i1	360749	363449	Hcv1.av93.c1.g52.i1	359611	363439	antisense	2
c1	Hcv1.av93.c1.g53.i2	360749	363449	Hcv1.av93.c1.g52.i1	359611	363439	antisense	3
c1	Hcv1.av93.c1.g531.i1	3309445	3310725	Hcv1.av93.c1.g530.i1	3309056	3317053	antisense	1
c1	Hcv1.av93.c1.g531.i1	3309445	3310725	Hcv1.av93.c1.g530.i2	3309056	3317053	antisense	1
c1	Hcv1.av93.c1.g531.i1	3309445	3310725	Hcv1.av93.c1.g530.i3	3309056	3317053	antisense	1
c1	Hcv1.av93.c1.g533.i1	3325672	3326679	Hcv1.av93.c1.g532.i1	3324618	3326968	antisense	4
c1	Hcv1.av93.c1.g538.i1	3341643	3342064	Hcv1.av93.c1.g537.i1	3341370	3342448	antisense	2
c1	Hcv1.av93.c1.g539.i1	3351051	3353992	Hcv1.av93.c1.g537.i1	3346941	3354198	sense	1
c1	Hcv1.av93.c1.g540.i1	3362868	3364333	Hcv1.av93.c1.g537.i1	3362847	3364524	antisense	2
c1	Hcv1.av93.c1.g550.i1	3483896	3487042	Hcv1.av93.c1.g549.i1	3483459	3486974	antisense	5
c1	Hcv1.av93.c1.g550.i1	3483896	3487042	Hcv1.av93.c1.g549.i2	3483459	3486974	antisense	5
c1	Hcv1.av93.c1.g554.i1	3493405	3494593	Hcv1.av93.c1.g553.i1	3492953	3497180	antisense	1
c1	Hcv1.av93.c1.g555.i1	3494807	3496568	Hcv1.av93.c1.g553.i1	3492953	3497180	antisense	1
c1	Hcv1.av93.c1.g562.i1	3516949	3521372	Hcv1.av93.c1.g561.i1	3516933	3527073	antisense	4
c1	Hcv1.av93.c1.g567.i1	3577975	3588573	Hcv1.av93.c1.g566.i1	3578331	3590596	antisense	2
c1	Hcv1.av93.c1.g568.i1	3579598	3580880	Hcv1.av93.c1.g566.i1	3578331	3590596	sense	1
c1	Hcv1.av93.c1.g568.i1	3579598	3580880	Hcv1.av93.c1.g567.i1	3578462	3587686	antisense	1
c1	Hcv1.av93.c1.g569.i1	3597309	3597722	Hcv1.av93.c1.g566.i1	3595522	3599366	antisense	1
c1	Hcv1.av93.c1.g570.i1	3597861	3598226	Hcv1.av93.c1.g566.i1	3595522	3599366	antisense	1
c1	Hcv1.av93.c1.g573.i1	3610737	3612358	Hcv1.av93.c1.g572.i1	3608560	3612628	sense	2
c1	Hcv1.av93.c1.g573.i1	3610737	3612358	Hcv1.av93.c1.g572.i2	3608560	3612628	sense	2
c1	Hcv1.av93.c1.g575.i1	3618715	3619407	Hcv1.av93.c1.g574.i1	3618000	3620034	antisense	1
c1	Hcv1.av93.c1.g575.i1	3618715	3619407	Hcv1.av93.c1.g574.i2	3618000	3620034	antisense	1
c1	Hcv1.av93.c1.g616.i1	3857915	3860446	Hcv1.av93.c1.g615.i1	3856887	3870031	antisense	4
c1	Hcv1.av93.c1.g616.i1	3857915	3860446	Hcv1.av93.c1.g615.i2	3856887	3870031	antisense	4
c1	Hcv1.av93.c1.g616.i2	3858308	3860446	Hcv1.av93.c1.g615.i1	3856887	3870031	antisense	3
c1	Hcv1.av93.c1.g616.i2	3858308	3860446	Hcv1.av93.c1.g615.i2	3856887	3870031	antisense	3
c1	Hcv1.av93.c1.g617.i1	3863388	3864701	Hcv1.av93.c1.g615.i1	3856887	3870031	antisense	3
c1	Hcv1.av93.c1.g617.i1	3863388	3864701	Hcv1.av93.c1.g615.i2	3856887	3870031	antisense	3
c1	Hcv1.av93.c1.g617.i2	3862647	3864701	Hcv1.av93.c1.g615.i1	3856887	3870031	antisense	3
c1	Hcv1.av93.c1.g617.i2	3862647	3864701	Hcv1.av93.c1.g615.i2	3856887	3870031	antisense	3
c1	Hcv1.av93.c1.g618.i1	3865172	3866438	Hcv1.av93.c1.g615.i1	3856887	3870031	antisense	2
c1	Hcv1.av93.c1.g618.i1	3865172	3866438	Hcv1.av93.c1.g615.i2	3856887	3870031	antisense	2
c1	Hcv1.av93.c1.g633.i1	3936563	3938393	Hcv1.av93.c1.g632.i3	3936039	3946893	sense	3
c1	Hcv1.av93.c1.g634.i1	3938448	3939480	Hcv1.av93.c1.g632.i3	3936039	3946893	sense	1
c1	Hcv1.av93.c1.g642.i1	4001985	4003632	Hcv1.av93.c1.g641.i1	4001747	4003675	antisense	1
c1	Hcv1.av93.c1.g643.i1	4014444	4015680	Hcv1.av93.c1.g641.i1	4013404	4016334	antisense	1
c1	Hcv1.av93.c1.g650.i1	4106467	4107537	Hcv1.av93.c1.g649.i1	4105233	4116951	sense	1
c1	Hcv1.av93.c1.g650.i1	4106467	4107537	Hcv1.av93.c1.g649.i2	4105233	4116951	sense	1
c1	Hcv1.av93.c1.g651.i1	4108822	4109280	Hcv1.av93.c1.g649.i1	4105233	4116951	antisense	1
c1	Hcv1.av93.c1.g651.i1	4108822	4109280	Hcv1.av93.c1.g649.i2	4105233	4116951	antisense	1
c1	Hcv1.av93.c1.g652.i1	4113642	4115247	Hcv1.av93.c1.g649.i1	4105233	4116951	sense	1
c1	Hcv1.av93.c1.g652.i1	4113642	4115247	Hcv1.av93.c1.g649.i2	4105233	4116951	sense	1
c1	Hcv1.av93.c1.g653.i1	4116353	4116857	Hcv1.av93.c1.g649.i1	4105233	4116951	sense	1
c1	Hcv1.av93.c1.g653.i1	4116353	4116857	Hcv1.av93.c1.g649.i2	4105233	4116951	sense	1
c1	Hcv1.av93.c1.g66.i1	479318	480453	Hcv1.av93.c1.g65.i1	475071	482304	sense	1
c1	Hcv1.av93.c1.g681.i1	4242513	4245361	Hcv1.av93.c1.g680.i1	4241774	4257274	antisense	3
c1	Hcv1.av93.c1.g681.i2	4242513	4245361	Hcv1.av93.c1.g680.i1	4241774	4257274	antisense	2
c1	Hcv1.av93.c1.g681.i3	4242542	4245361	Hcv1.av93.c1.g680.i1	4241774	4257274	antisense	4
c1	Hcv1.av93.c1.g681.i4	4241580	4245361	Hcv1.av93.c1.g680.i1	4241774	4257274	antisense	3
c1	Hcv1.av93.c1.g682.i1	4245932	4246534	Hcv1.av93.c1.g680.i1	4241774	4257274	antisense	2
c1	Hcv1.av93.c1.g683.i1	4247217	4248150	Hcv1.av93.c1.g680.i1	4241774	4257274	antisense	2
c1	Hcv1.av93.c1.g684.i1	4248621	4249662	Hcv1.av93.c1.g680.i1	4241774	4257274	antisense	1
c1	Hcv1.av93.c1.g685.i1	4249783	4252931	Hcv1.av93.c1.g680.i1	4241774	4257274	antisense	2
c1	Hcv1.av93.c1.g685.i2	4249947	4254125	Hcv1.av93.c1.g680.i1	4241774	4257274	antisense	1
c1	Hcv1.av93.c1.g686.i1	4261021	4263215	Hcv1.av93.c1.g680.i1	4260920	4263264	antisense	3
c1	Hcv1.av93.c1.g686.i1	4261021	4263215	Hcv1.av93.c1.g680.i3	4260920	4263264	antisense	3
c1	Hcv1.av93.c1.g69.i1	539973	541246	Hcv1.av93.c1.g68.i1	537329	542001	sense	1
c1	Hcv1.av93.c1.g69.i1	539973	541246	Hcv1.av93.c1.g68.i2	537329	542001	sense	1
c1	Hcv1.av93.c1.g693.i1	4299876	4301301	Hcv1.av93.c1.g692.i1	4297773	4301799	antisense	1
c1	Hcv1.av93.c1.g71.i1	553388	554641	Hcv1.av93.c1.g70.i1	551262	560395	antisense	2
c1	Hcv1.av93.c1.g710.i1	4387153	4392091	Hcv1.av93.c1.g708.i1	4385386	4392747	antisense	3
c1	Hcv1.av93.c1.g710.i1	4387153	4392091	Hcv1.av93.c1.g708.i2	4385386	4392747	antisense	3
c1	Hcv1.av93.c1.g710.i1	4387153	4392091	Hcv1.av93.c1.g708.i3	4385386	4392747	antisense	3
c1	Hcv1.av93.c1.g712.i1	4396685	4398467	Hcv1.av93.c1.g711.i1	4395395	4405647	sense	1
c1	Hcv1.av93.c1.g717.i4	4431094	4431799	Hcv1.av93.c1.g716.i1	4429534	4433819	sense	1
c1	Hcv1.av93.c1.g731.i1	4499788	4507403	Hcv1.av93.c1.g730.i1	4497261	4514569	antisense	5
c1	Hcv1.av93.c1.g731.i2	4502291	4507403	Hcv1.av93.c1.g730.i1	4497261	4514569	antisense	5
c1	Hcv1.av93.c1.g732.i1	4508628	4510203	Hcv1.av93.c1.g730.i1	4497261	4514569	sense	1
c1	Hcv1.av93.c1.g733.i1	4511145	4514232	Hcv1.av93.c1.g730.i1	4497261	4514569	antisense	2
c1	Hcv1.av93.c1.g734.i1	4517306	4522437	Hcv1.av93.c1.g730.i1	4516855	4522492	sense	1
c1	Hcv1.av93.c1.g736.i1	4537737	4541021	Hcv1.av93.c1.g730.i1	4523833	4544244	antisense	3
c1	Hcv1.av93.c1.g736.i1	4537737	4541021	Hcv1.av93.c1.g735.i1	4535776	4541449	antisense	3
c1	Hcv1.av93.c1.g737.i2	4545652	4551674	Hcv1.av93.c1.g730.i1	4544666	4554449	sense	14
c1	Hcv1.av93.c1.g737.i2	4545652	4551674	Hcv1.av93.c1.g735.i1	4543970	4554449	sense	14
c1	Hcv1.av93.c1.g74.i1	576500	577850	Hcv1.av93.c1.g73.i1	574628	581853	antisense	4
c1	Hcv1.av93.c1.g743.i1	4570980	4571626	Hcv1.av93.c1.g742.i1	4570836	4572489	antisense	2
c1	Hcv1.av93.c1.g754.i1	4630325	4631615	Hcv1.av93.c1.g751.i2	4620401	4633102	sense	1
c1	Hcv1.av93.c1.g754.i1	4630325	4631615	Hcv1.av93.c1.g751.i3	4620401	4632697	sense	1
c1	Hcv1.av93.c1.g754.i1	4630325	4631615	Hcv1.av93.c1.g753.i1	4620401	4635999	sense	1
c1	Hcv1.av93.c1.g755.i1	4647017	4649031	Hcv1.av93.c1.g752.i1	4646672	4649051	antisense	1
c1	Hcv1.av93.c1.g756.i1	4650174	4654241	Hcv1.av93.c1.g752.i1	4649661	4654491	antisense	5
c1	Hcv1.av93.c1.g768.i1	4716801	4719838	Hcv1.av93.c1.g767.i1	4716784	4724112	antisense	10
c1	Hcv1.av93.c1.g768.i1	4716801	4719838	Hcv1.av93.c1.g767.i2	4716784	4724112	antisense	10
c1	Hcv1.av93.c1.g768.i1	4716801	4719838	Hcv1.av93.c1.g767.i3	4716784	4724112	antisense	10
c1	Hcv1.av93.c1.g769.i1	4720510	4724061	Hcv1.av93.c1.g767.i1	4716784	4724112	antisense	10
c1	Hcv1.av93.c1.g769.i1	4720510	4724061	Hcv1.av93.c1.g767.i2	4716784	4724112	antisense	10
c1	Hcv1.av93.c1.g769.i1	4720510	4724061	Hcv1.av93.c1.g767.i3	4716784	4724112	antisense	10
c1	Hcv1.av93.c1.g776.i1	4753276	4754335	Hcv1.av93.c1.g775.i1	4752713	4754971	sense	1
c1	Hcv1.av93.c1.g777.i1	4755162	4757590	Hcv1.av93.c1.g775.i1	4755080	4758628	antisense	7
c1	Hcv1.av93.c1.g779.i1	4764361	4765452	Hcv1.av93.c1.g778.i1	4764238	4765957	antisense	2
c1	Hcv1.av93.c1.g781.i1	4773388	4774340	Hcv1.av93.c1.g780.i1	4772517	4777114	sense	1
c1	Hcv1.av93.c1.g781.i1	4773388	4774340	Hcv1.av93.c1.g780.i2	4772517	4777114	sense	1
c1	Hcv1.av93.c1.g781.i1	4773388	4774340	Hcv1.av93.c1.g780.i3	4772517	4777114	sense	1
c1	Hcv1.av93.c1.g781.i1	4773388	4774340	Hcv1.av93.c1.g780.i4	4772517	4777114	sense	1
c1	Hcv1.av93.c1.g781.i1	4773388	4774340	Hcv1.av93.c1.g780.i5	4772517	4777114	sense	1
c1	Hcv1.av93.c1.g781.i1	4773388	4774340	Hcv1.av93.c1.g780.i6	4769115	4778475	sense	1
c1	Hcv1.av93.c1.g781.i1	4773388	4774340	Hcv1.av93.c1.g780.i7	4772517	4777114	sense	1
c1	Hcv1.av93.c1.g782.i1	4793202	4797017	Hcv1.av93.c1.g780.i1	4789816	4802007	sense	1
c1	Hcv1.av93.c1.g782.i1	4793202	4797017	Hcv1.av93.c1.g780.i2	4789816	4802007	sense	1
c1	Hcv1.av93.c1.g782.i1	4793202	4797017	Hcv1.av93.c1.g780.i3	4789816	4802007	sense	1
c1	Hcv1.av93.c1.g782.i1	4793202	4797017	Hcv1.av93.c1.g780.i4	4789816	4802007	sense	1
c1	Hcv1.av93.c1.g782.i1	4793202	4797017	Hcv1.av93.c1.g780.i5	4789816	4802007	sense	1
c1	Hcv1.av93.c1.g782.i1	4793202	4797017	Hcv1.av93.c1.g780.i6	4789816	4802007	sense	1
c1	Hcv1.av93.c1.g782.i1	4793202	4797017	Hcv1.av93.c1.g780.i7	4789816	4802007	sense	1
c1	Hcv1.av93.c1.g794.i1	4835980	4838336	Hcv1.av93.c1.g793.i1	4835756	4839951	sense	1
c1	Hcv1.av93.c1.g795.i1	4841496	4841956	Hcv1.av93.c1.g793.i1	4840468	4843827	antisense	1
c1	Hcv1.av93.c1.g798.i1	4859755	4862269	Hcv1.av93.c1.g797.i1	4857686	4862253	antisense	5
c1	Hcv1.av93.c1.g80.i1	645969	646374	Hcv1.av93.c1.g78.i1	645646	648008	antisense	1
c1	Hcv1.av93.c1.g80.i1	645969	646374	Hcv1.av93.c1.g78.i2	645646	648159	antisense	1
c1	Hcv1.av93.c1.g80.i1	645969	646374	Hcv1.av93.c1.g78.i3	645646	648159	antisense	1
c1	Hcv1.av93.c1.g805.i1	4892250	4893158	Hcv1.av93.c1.g804.i1	4888656	4893491	sense	2
c1	Hcv1.av93.c1.g805.i1	4892250	4893158	Hcv1.av93.c1.g804.i2	4888947	4893491	sense	2
c1	Hcv1.av93.c1.g805.i1	4892250	4893158	Hcv1.av93.c1.g804.i3	4888656	4893491	sense	2
c1	Hcv1.av93.c1.g805.i1	4892250	4893158	Hcv1.av93.c1.g804.i4	4888947	4893491	sense	2
c1	Hcv1.av93.c1.g807.i1	4903622	4905522	Hcv1.av93.c1.g792.i1	4900567	4906656	antisense	1
c1	Hcv1.av93.c1.g808.i1	4903926	4905059	Hcv1.av93.c1.g792.i1	4900567	4906656	antisense	1
c1	Hcv1.av93.c1.g81.i1	649413	652059	Hcv1.av93.c1.g78.i1	648465	658353	sense	1
c1	Hcv1.av93.c1.g81.i1	649413	652059	Hcv1.av93.c1.g78.i2	648465	658353	sense	1
c1	Hcv1.av93.c1.g81.i1	649413	652059	Hcv1.av93.c1.g78.i3	648465	658353	sense	1
c1	Hcv1.av93.c1.g812.i1	4933636	4934734	Hcv1.av93.c1.g810.i1	4933391	4937068	sense	1
c1	Hcv1.av93.c1.g813.i1	4934977	4937368	Hcv1.av93.c1.g810.i1	4933391	4937068	antisense	1
c1	Hcv1.av93.c1.g82.i1	654864	656829	Hcv1.av93.c1.g78.i1	648465	658353	sense	1
c1	Hcv1.av93.c1.g82.i1	654864	656829	Hcv1.av93.c1.g78.i2	648465	658353	sense	1
c1	Hcv1.av93.c1.g82.i1	654864	656829	Hcv1.av93.c1.g78.i3	648465	658353	sense	1
c1	Hcv1.av93.c1.g821.i1	5041773	5044768	Hcv1.av93.c1.g820.i1	5040477	5052791	antisense	1
c1	Hcv1.av93.c1.g821.i1	5041773	5044768	Hcv1.av93.c1.g820.i2	5040477	5052791	antisense	1
c1	Hcv1.av93.c1.g821.i1	5041773	5044768	Hcv1.av93.c1.g820.i3	5040477	5052791	antisense	1
c1	Hcv1.av93.c1.g822.i1	5049627	5052627	Hcv1.av93.c1.g820.i1	5040477	5052791	sense	2
c1	Hcv1.av93.c1.g822.i1	5049627	5052627	Hcv1.av93.c1.g820.i2	5040477	5052791	sense	2
c1	Hcv1.av93.c1.g822.i1	5049627	5052627	Hcv1.av93.c1.g820.i3	5040477	5052791	sense	2
c1	Hcv1.av93.c1.g828.i1	5075911	5079327	Hcv1.av93.c1.g827.i1	5075873	5079497	antisense	1
c1	Hcv1.av93.c1.g833.i1	5093091	5094234	Hcv1.av93.c1.g832.i1	5093063	5094525	sense	1
c1	Hcv1.av93.c1.g833.i1	5093091	5094234	Hcv1.av93.c1.g832.i2	5093063	5094525	sense	1
c1	Hcv1.av93.c1.g84.i1	665220	666647	Hcv1.av93.c1.g83.i1	665088	669628	antisense	2
c1	Hcv1.av93.c1.g84.i1	665220	666647	Hcv1.av93.c1.g83.i2	665088	669628	antisense	2
c1	Hcv1.av93.c1.g841.i1	5130301	5131188	Hcv1.av93.c1.g840.i1	5128460	5133429	antisense	1
c1	Hcv1.av93.c1.g847.i1	5158484	5159216	Hcv1.av93.c1.g846.i1	5157557	5159328	antisense	2
c1	Hcv1.av93.c1.g850.i1	5175272	5179170	Hcv1.av93.c1.g849.i1	5173848	5181213	antisense	1
c1	Hcv1.av93.c1.g867.i1	5281389	5287581	Hcv1.av93.c1.g866.i3	5280502	5290746	antisense	5
c1	Hcv1.av93.c1.g870.i1	5295025	5299245	Hcv1.av93.c1.g869.i1	5294938	5299867	sense	1
c1	Hcv1.av93.c1.g871.i1	5301701	5303768	Hcv1.av93.c1.g869.i1	5301643	5308083	antisense	2
c1	Hcv1.av93.c1.g874.i1	5324649	5328021	Hcv1.av93.c1.g873.i1	5324011	5330072	antisense	2
c1	Hcv1.av93.c1.g875.i1	5328047	5328471	Hcv1.av93.c1.g873.i1	5324011	5330072	antisense	1
c1	Hcv1.av93.c1.g884.i1	5376524	5376828	Hcv1.av93.c1.g883.i1	5375061	5380751	antisense	1
c1	Hcv1.av93.c1.g884.i1	5376524	5376828	Hcv1.av93.c1.g883.i2	5375061	5380751	antisense	1
c1	Hcv1.av93.c1.g885.i1	5377250	5379980	Hcv1.av93.c1.g883.i1	5375061	5380751	antisense	2
c1	Hcv1.av93.c1.g885.i1	5377250	5379980	Hcv1.av93.c1.g883.i2	5375061	5380751	antisense	2
c1	Hcv1.av93.c1.g896.i1	5511620	5513423	Hcv1.av93.c1.g894.i1	5509063	5515146	sense	1
c1	Hcv1.av93.c1.g910.i1	5676594	5683316	Hcv1.av93.c1.g913.i1	5676269	5683194	antisense	12
c1	Hcv1.av93.c1.g910.i1	5676594	5683316	Hcv1.av93.c1.g913.i2	5676269	5683194	antisense	12
c1	Hcv1.av93.c1.g911.i1	5666296	5668650	Hcv1.av93.c1.g905.i1	5662435	5673435	antisense	2
c1	Hcv1.av93.c1.g911.i1	5666296	5668650	Hcv1.av93.c1.g905.i2	5662435	5673435	antisense	2
c1	Hcv1.av93.c1.g911.i1	5666296	5668650	Hcv1.av93.c1.g910.i2	5663473	5676811	sense	2
c1	Hcv1.av93.c1.g912.i1	5671349	5671974	Hcv1.av93.c1.g905.i1	5662435	5673435	antisense	1
c1	Hcv1.av93.c1.g912.i1	5671349	5671974	Hcv1.av93.c1.g905.i2	5662435	5673435	antisense	1
c1	Hcv1.av93.c1.g912.i1	5671349	5671974	Hcv1.av93.c1.g910.i2	5663473	5676811	sense	1
c1	Hcv1.av93.c1.g918.i1	5710046	5710852	Hcv1.av93.c1.g917.i1	5707216	5710891	antisense	1
c1	Hcv1.av93.c1.g92.i1	730288	732538	Hcv1.av93.c1.g91.i1	730027	733556	antisense	1
c1	Hcv1.av93.c1.g92.i1	730288	732538	Hcv1.av93.c1.g91.i2	730027	733556	antisense	1
c1	Hcv1.av93.c1.g92.i1	730288	732538	Hcv1.av93.c1.g91.i3	730027	733556	antisense	1
c1	Hcv1.av93.c1.g927.i1	5768445	5769524	Hcv1.av93.c1.g926.i1	5767228	5774894	antisense	1
c1	Hcv1.av93.c1.g927.i1	5768445	5769524	Hcv1.av93.c1.g926.i2	5767228	5774894	antisense	1
c1	Hcv1.av93.c1.g927.i1	5768445	5769524	Hcv1.av93.c1.g926.i3	5767228	5774894	antisense	1
c1	Hcv1.av93.c1.g927.i1	5768445	5769524	Hcv1.av93.c1.g926.i4	5767228	5774894	antisense	1
c1	Hcv1.av93.c1.g928.i1	5776710	5778183	Hcv1.av93.c1.g926.i1	5776691	5779117	sense	1
c1	Hcv1.av93.c1.g928.i1	5776710	5778183	Hcv1.av93.c1.g926.i2	5776691	5779117	sense	1
c1	Hcv1.av93.c1.g928.i1	5776710	5778183	Hcv1.av93.c1.g926.i3	5776691	5779117	sense	1
c1	Hcv1.av93.c1.g928.i1	5776710	5778183	Hcv1.av93.c1.g926.i4	5776691	5779117	sense	1
c1	Hcv1.av93.c1.g929.i1	5780794	5782799	Hcv1.av93.c1.g926.i1	5779265	5783072	antisense	1
c1	Hcv1.av93.c1.g929.i1	5780794	5782799	Hcv1.av93.c1.g926.i2	5779265	5783072	antisense	1
c1	Hcv1.av93.c1.g929.i1	5780794	5782799	Hcv1.av93.c1.g926.i3	5779265	5783072	antisense	1
c1	Hcv1.av93.c1.g929.i1	5780794	5782799	Hcv1.av93.c1.g926.i4	5779265	5783072	antisense	1
c1	Hcv1.av93.c1.g93.i1	738530	739956	Hcv1.av93.c1.g91.i1	738256	741871	antisense	4
c1	Hcv1.av93.c1.g93.i1	738530	739956	Hcv1.av93.c1.g91.i2	738256	741871	antisense	4
c1	Hcv1.av93.c1.g93.i1	738530	739956	Hcv1.av93.c1.g91.i3	738256	741871	antisense	4
c1	Hcv1.av93.c1.g930.i1	5791031	5792285	Hcv1.av93.c1.g926.i2	5786392	5801449	sense	1
c1	Hcv1.av93.c1.g930.i1	5791031	5792285	Hcv1.av93.c1.g926.i3	5786392	5801449	sense	1
c1	Hcv1.av93.c1.g930.i1	5791031	5792285	Hcv1.av93.c1.g926.i4	5786392	5801449	sense	1
c1	Hcv1.av93.c1.g933.i1	5815029	5816906	Hcv1.av93.c1.g931.i2	5810415	5817548	antisense	1
c1	Hcv1.av93.c1.g933.i1	5815029	5816906	Hcv1.av93.c1.g932.i1	5810415	5817548	antisense	1
c1	Hcv1.av93.c1.g94.i1	739958	741716	Hcv1.av93.c1.g91.i1	738256	741871	antisense	5
c1	Hcv1.av93.c1.g94.i1	739958	741716	Hcv1.av93.c1.g91.i2	738256	741871	antisense	5
c1	Hcv1.av93.c1.g94.i1	739958	741716	Hcv1.av93.c1.g91.i3	738256	741871	antisense	5
c1	Hcv1.av93.c1.g947.i1	5920563	5921052	Hcv1.av93.c1.g946.i1	5917692	5922046	sense	1
c1	Hcv1.av93.c1.g948.i1	5928464	5930198	Hcv1.av93.c1.g946.i1	5928421	5930115	antisense	2
c1	Hcv1.av93.c1.g95.i1	753353	754268	Hcv1.av93.c1.g91.i3	752559	754567	sense	1
c1	Hcv1.av93.c1.g972.i1	6020558	6023251	Hcv1.av93.c1.g971.i1	6020480	6023876	antisense	4
c1	Hcv1.av93.c1.g972.i1	6020558	6023251	Hcv1.av93.c1.g971.i2	6020480	6023876	antisense	4
c1	Hcv1.av93.c1.g975.i1	6042867	6046218	Hcv1.av93.c1.g974.i1	6039655	6046541	antisense	1
c1	Hcv1.av93.c1.g98.i1	766146	766999	Hcv1.av93.c1.g97.i1	766026	768786	antisense	1
c1	Hcv1.av93.c1.g980.i1	6066885	6073133	Hcv1.av93.c1.g979.i1	6066854	6086747	antisense	9
c1	Hcv1.av93.c1.g989.i1	6142127	6143279	Hcv1.av93.c1.g988.i1	6141741	6145663	antisense	3
c1	Hcv1.av93.c1.g989.i1	6142127	6143279	Hcv1.av93.c1.g988.i2	6141741	6145663	antisense	3
c1	Hcv1.av93.c1.g993.i1	6166969	6169323	Hcv1.av93.c1.g992.i1	6166778	6170290	sense	1
c1	Hcv1.av93.c1.g994.i1	6172468	6173357	Hcv1.av93.c1.g992.i1	6171527	6173524	antisense	2
c10	Hcv1.av93.c10.g109.i1	955017	956978	Hcv1.av93.c10.g108.i1	953253	957379	antisense	3
c10	Hcv1.av93.c10.g109.i1	955017	956978	Hcv1.av93.c10.g108.i2	953253	957379	antisense	3
c10	Hcv1.av93.c10.g109.i1	955017	956978	Hcv1.av93.c10.g108.i3	953253	957379	antisense	3
c10	Hcv1.av93.c10.g109.i2	955017	956978	Hcv1.av93.c10.g108.i1	953253	957379	antisense	4
c10	Hcv1.av93.c10.g109.i2	955017	956978	Hcv1.av93.c10.g108.i2	953253	957379	antisense	4
c10	Hcv1.av93.c10.g109.i2	955017	956978	Hcv1.av93.c10.g108.i3	953253	957379	antisense	4
c10	Hcv1.av93.c10.g109.i3	955017	956978	Hcv1.av93.c10.g108.i1	953253	957379	antisense	5
c10	Hcv1.av93.c10.g109.i3	955017	956978	Hcv1.av93.c10.g108.i2	953253	957379	antisense	5
c10	Hcv1.av93.c10.g109.i3	955017	956978	Hcv1.av93.c10.g108.i3	953253	957379	antisense	5
c10	Hcv1.av93.c10.g110.i1	960431	961099	Hcv1.av93.c10.g108.i1	960276	962347	sense	2
c10	Hcv1.av93.c10.g110.i1	960431	961099	Hcv1.av93.c10.g108.i2	960276	962347	sense	2
c10	Hcv1.av93.c10.g110.i1	960431	961099	Hcv1.av93.c10.g108.i3	960276	962347	sense	2
c10	Hcv1.av93.c10.g111.i1	981445	992698	Hcv1.av93.c10.g108.i1	980710	999063	antisense	24
c10	Hcv1.av93.c10.g111.i1	981445	992698	Hcv1.av93.c10.g108.i2	980710	999063	antisense	24
c10	Hcv1.av93.c10.g111.i1	981445	992698	Hcv1.av93.c10.g108.i3	980710	999063	antisense	24
c10	Hcv1.av93.c10.g112.i1	994932	997054	Hcv1.av93.c10.g108.i1	980710	999063	antisense	1
c10	Hcv1.av93.c10.g112.i1	994932	997054	Hcv1.av93.c10.g108.i2	980710	999063	antisense	1
c10	Hcv1.av93.c10.g112.i1	994932	997054	Hcv1.av93.c10.g108.i3	980710	999063	antisense	1
c10	Hcv1.av93.c10.g114.i1	1009863	1011589	Hcv1.av93.c10.g113.i1	1009716	1026454	antisense	2
c10	Hcv1.av93.c10.g114.i1	1009863	1011589	Hcv1.av93.c10.g113.i2	1009716	1026454	antisense	2
c10	Hcv1.av93.c10.g115.i1	1023071	1024240	Hcv1.av93.c10.g113.i1	1009716	1026454	antisense	2
c10	Hcv1.av93.c10.g115.i1	1023071	1024240	Hcv1.av93.c10.g113.i2	1009716	1026454	antisense	2
c10	Hcv1.av93.c10.g116.i1	1024313	1025015	Hcv1.av93.c10.g113.i1	1009716	1026454	antisense	1
c10	Hcv1.av93.c10.g116.i1	1024313	1025015	Hcv1.av93.c10.g113.i2	1009716	1026454	antisense	1
c10	Hcv1.av93.c10.g139.i1	1289767	1291332	Hcv1.av93.c10.g138.i1	1289478	1291848	sense	1
c10	Hcv1.av93.c10.g139.i1	1289767	1291332	Hcv1.av93.c10.g138.i2	1289478	1291848	sense	1
c10	Hcv1.av93.c10.g139.i1	1289767	1291332	Hcv1.av93.c10.g138.i3	1289478	1291848	sense	1
c10	Hcv1.av93.c10.g139.i1	1289767	1291332	Hcv1.av93.c10.g138.i4	1289478	1291848	sense	1
c10	Hcv1.av93.c10.g139.i1	1289767	1291332	Hcv1.av93.c10.g138.i5	1289478	1291848	sense	1
c10	Hcv1.av93.c10.g139.i1	1289767	1291332	Hcv1.av93.c10.g138.i6	1289478	1291848	sense	1
c10	Hcv1.av93.c10.g139.i1	1289767	1291332	Hcv1.av93.c10.g138.i7	1289478	1291848	sense	1
c10	Hcv1.av93.c10.g139.i1	1289767	1291332	Hcv1.av93.c10.g138.i8	1289478	1291848	sense	1
c10	Hcv1.av93.c10.g139.i1	1289767	1291332	Hcv1.av93.c10.g138.i9	1289478	1291848	sense	1
c10	Hcv1.av93.c10.g139.i1	1289767	1291332	Hcv1.av93.c10.g138.i10	1289478	1291848	sense	1
c10	Hcv1.av93.c10.g139.i1	1289767	1291332	Hcv1.av93.c10.g138.i11	1289478	1291848	sense	1
c10	Hcv1.av93.c10.g139.i1	1289767	1291332	Hcv1.av93.c10.g138.i12	1289478	1291848	sense	1
c10	Hcv1.av93.c10.g139.i1	1289767	1291332	Hcv1.av93.c10.g138.i13	1289478	1291848	sense	1
c10	Hcv1.av93.c10.g139.i1	1289767	1291332	Hcv1.av93.c10.g138.i14	1289478	1291848	sense	1
c10	Hcv1.av93.c10.g150.i1	1404085	1405922	Hcv1.av93.c10.g149.i1	1402992	1406186	antisense	4
c10	Hcv1.av93.c10.g155.i1	1475914	1477303	Hcv1.av93.c10.g154.i1	1475521	1477475	antisense	1
c10	Hcv1.av93.c10.g160.i1	1510845	1512686	Hcv1.av93.c10.g159.i1	1510657	1516807	sense	1
c10	Hcv1.av93.c10.g160.i1	1510845	1512686	Hcv1.av93.c10.g159.i2	1510657	1516807	sense	1
c10	Hcv1.av93.c10.g161.i1	1514187	1515776	Hcv1.av93.c10.g159.i1	1510657	1516807	antisense	1
c10	Hcv1.av93.c10.g161.i1	1514187	1515776	Hcv1.av93.c10.g159.i2	1510657	1516807	antisense	1
c10	Hcv1.av93.c10.g168.i1	1634717	1635952	Hcv1.av93.c10.g167.i1	1633260	1641520	antisense	1
c10	Hcv1.av93.c10.g175.i1	1680405	1681149	Hcv1.av93.c10.g174.i1	1680261	1685399	antisense	1
c10	Hcv1.av93.c10.g175.i1	1680405	1681149	Hcv1.av93.c10.g174.i2	1680261	1685399	antisense	1
c10	Hcv1.av93.c10.g176.i1	1685807	1687730	Hcv1.av93.c10.g174.i1	1685524	1689037	antisense	2
c10	Hcv1.av93.c10.g176.i1	1685807	1687730	Hcv1.av93.c10.g174.i2	1685524	1689037	antisense	2
c10	Hcv1.av93.c10.g178.i1	1705578	1705886	Hcv1.av93.c10.g177.i1	1703207	1715117	sense	1
c10	Hcv1.av93.c10.g189.i1	1809541	1810541	Hcv1.av93.c10.g188.i1	1807649	1813834	antisense	1
c10	Hcv1.av93.c10.g190.i1	1811087	1811481	Hcv1.av93.c10.g188.i1	1807649	1813834	antisense	1
c10	Hcv1.av93.c10.g193.i1	1845585	1845827	Hcv1.av93.c10.g192.i1	1843707	1860402	sense	1
c10	Hcv1.av93.c10.g196.i1	1873660	1874423	Hcv1.av93.c10.g195.i1	1873342	1874790	sense	1
c10	Hcv1.av93.c10.g197.i1	1885044	1886264	Hcv1.av93.c10.g195.i1	1882965	1887027	antisense	2
c10	Hcv1.av93.c10.g199.i1	1906057	1911312	Hcv1.av93.c10.g198.i1	1905912	1913134	antisense	9
c10	Hcv1.av93.c10.g204.i1	1935119	1935804	Hcv1.av93.c10.g203.i1	1931430	1940445	sense	3
c10	Hcv1.av93.c10.g205.i1	1955211	1955870	Hcv1.av93.c10.g203.i1	1954653	1959994	antisense	2
c10	Hcv1.av93.c10.g21.i1	210934	212987	Hcv1.av93.c10.g20.i1	209521	216593	antisense	7
c10	Hcv1.av93.c10.g216.i1	2130123	2131450	Hcv1.av93.c10.g215.i1	2130082	2131764	sense	1
c10	Hcv1.av93.c10.g216.i1	2130123	2131450	Hcv1.av93.c10.g215.i2	2130082	2131764	sense	1
c10	Hcv1.av93.c10.g219.i1	2168499	2169566	Hcv1.av93.c10.g218.i1	2168023	2170505	sense	1
c10	Hcv1.av93.c10.g221.i1	2183782	2185843	Hcv1.av93.c10.g220.i1	2183793	2186545	antisense	1
c10	Hcv1.av93.c10.g227.i1	2232344	2233532	Hcv1.av93.c10.g226.i3	2232193	2234283	sense	1
c10	Hcv1.av93.c10.g23.i1	246394	248586	Hcv1.av93.c10.g22.i1	242678	249624	sense	1
c10	Hcv1.av93.c10.g230.i1	2257506	2261043	Hcv1.av93.c10.g229.i1	2257225	2261697	antisense	2
c10	Hcv1.av93.c10.g230.i1	2257506	2261043	Hcv1.av93.c10.g229.i2	2257225	2261697	antisense	2
c10	Hcv1.av93.c10.g230.i1	2257506	2261043	Hcv1.av93.c10.g229.i3	2257225	2262061	antisense	2
c10	Hcv1.av93.c10.g234.i1	2292653	2294534	Hcv1.av93.c10.g233.i1	2291949	2296565	sense	3
c10	Hcv1.av93.c10.g236.i1	2305815	2307575	Hcv1.av93.c10.g235.i1	2301148	2307881	antisense	3
c10	Hcv1.av93.c10.g237.i1	2314230	2315012	Hcv1.av93.c10.g235.i1	2312713	2320116	sense	2
c10	Hcv1.av93.c10.g238.i1	2316511	2318212	Hcv1.av93.c10.g235.i1	2312713	2320116	sense	1
c10	Hcv1.av93.c10.g243.i1	2370422	2370795	Hcv1.av93.c10.g242.i1	2370013	2375860	sense	1
c10	Hcv1.av93.c10.g243.i1	2370422	2370795	Hcv1.av93.c10.g242.i2	2370013	2375860	sense	1
c10	Hcv1.av93.c10.g243.i1	2370422	2370795	Hcv1.av93.c10.g242.i3	2370013	2375860	sense	1
c10	Hcv1.av93.c10.g245.i1	2411479	2413017	Hcv1.av93.c10.g244.i1	2408541	2414933	antisense	5
c10	Hcv1.av93.c10.g251.i1	2470447	2470894	Hcv1.av93.c10.g250.i1	2468488	2483217	antisense	2
c10	Hcv1.av93.c10.g251.i1	2470447	2470894	Hcv1.av93.c10.g250.i2	2468798	2483217	antisense	2
c10	Hcv1.av93.c10.g252.i1	2476745	2478457	Hcv1.av93.c10.g250.i1	2468488	2483217	antisense	2
c10	Hcv1.av93.c10.g252.i1	2476745	2478457	Hcv1.av93.c10.g250.i2	2468798	2483217	antisense	2
c10	Hcv1.av93.c10.g252.i2	2476789	2478457	Hcv1.av93.c10.g250.i1	2468488	2483217	antisense	2
c10	Hcv1.av93.c10.g252.i2	2476789	2478457	Hcv1.av93.c10.g250.i2	2468798	2483217	antisense	2
c10	Hcv1.av93.c10.g252.i3	2476789	2478457	Hcv1.av93.c10.g250.i1	2468488	2483217	antisense	2
c10	Hcv1.av93.c10.g252.i3	2476789	2478457	Hcv1.av93.c10.g250.i2	2468798	2483217	antisense	2
c10	Hcv1.av93.c10.g252.i4	2476789	2478457	Hcv1.av93.c10.g250.i1	2468488	2483217	antisense	2
c10	Hcv1.av93.c10.g252.i4	2476789	2478457	Hcv1.av93.c10.g250.i2	2468798	2483217	antisense	2
c10	Hcv1.av93.c10.g253.i1	2488873	2500483	Hcv1.av93.c10.g250.i1	2487999	2501046	antisense	9
c10	Hcv1.av93.c10.g253.i1	2488873	2500483	Hcv1.av93.c10.g250.i2	2487999	2501046	antisense	9
c10	Hcv1.av93.c10.g256.i1	2554140	2560856	Hcv1.av93.c10.g255.i1	2553472	2561867	antisense	4
c10	Hcv1.av93.c10.g256.i1	2554140	2560856	Hcv1.av93.c10.g255.i2	2553472	2561867	antisense	4
c10	Hcv1.av93.c10.g256.i2	2554140	2558254	Hcv1.av93.c10.g255.i1	2553472	2561867	antisense	3
c10	Hcv1.av93.c10.g256.i2	2554140	2558254	Hcv1.av93.c10.g255.i2	2553472	2561867	antisense	3
c10	Hcv1.av93.c10.g264.i1	2707532	2708132	Hcv1.av93.c10.g263.i1	2703859	2717185	sense	2
c10	Hcv1.av93.c10.g265.i1	2708249	2708880	Hcv1.av93.c10.g263.i1	2703859	2717185	sense	2
c10	Hcv1.av93.c10.g270.i1	2798657	2801240	Hcv1.av93.c10.g269.i1	2798418	2802866	antisense	7
c10	Hcv1.av93.c10.g270.i1	2798657	2801240	Hcv1.av93.c10.g269.i2	2798418	2802866	antisense	7
c10	Hcv1.av93.c10.g270.i1	2798657	2801240	Hcv1.av93.c10.g269.i3	2798418	2802866	antisense	7
c10	Hcv1.av93.c10.g284.i1	2919267	2921373	Hcv1.av93.c10.g283.i1	2917621	2923994	sense	6
c10	Hcv1.av93.c10.g288.i1	2944540	2951332	Hcv1.av93.c10.g287.i1	2942074	2952565	antisense	2
c10	Hcv1.av93.c10.g292.i1	2975195	2977917	Hcv1.av93.c10.g291.i1	2974203	2978248	sense	2
c10	Hcv1.av93.c10.g300.i1	3113487	3116909	Hcv1.av93.c10.g299.i1	3113232	3116971	antisense	1
c10	Hcv1.av93.c10.g300.i1	3113487	3116909	Hcv1.av93.c10.g299.i2	3113232	3116971	antisense	1
c10	Hcv1.av93.c10.g300.i1	3113487	3116909	Hcv1.av93.c10.g299.i3	3113232	3116971	antisense	1
c10	Hcv1.av93.c10.g300.i1	3113487	3116909	Hcv1.av93.c10.g299.i4	3113232	3116971	antisense	1
c10	Hcv1.av93.c10.g309.i1	3294642	3297377	Hcv1.av93.c10.g308.i1	3294405	3301234	antisense	1
c10	Hcv1.av93.c10.g321.i1	3379940	3381142	Hcv1.av93.c10.g320.i1	3378600	3381815	sense	2
c10	Hcv1.av93.c10.g321.i1	3379940	3381142	Hcv1.av93.c10.g320.i2	3378600	3381815	sense	2
c10	Hcv1.av93.c10.g321.i1	3379940	3381142	Hcv1.av93.c10.g320.i3	3378600	3381815	sense	2
c10	Hcv1.av93.c10.g325.i1	3420867	3421469	Hcv1.av93.c10.g324.i1	3418717	3422824	sense	1
c10	Hcv1.av93.c10.g325.i1	3420867	3421469	Hcv1.av93.c10.g324.i2	3418717	3422824	sense	1
c10	Hcv1.av93.c10.g325.i1	3420867	3421469	Hcv1.av93.c10.g324.i3	3418717	3422824	sense	1
c10	Hcv1.av93.c10.g327.i1	3429656	3430248	Hcv1.av93.c10.g326.i1	3425906	3433678	sense	1
c10	Hcv1.av93.c10.g329.i1	3449412	3452787	Hcv1.av93.c10.g328.i1	3441600	3457202	antisense	6
c10	Hcv1.av93.c10.g329.i1	3449412	3452787	Hcv1.av93.c10.g328.i2	3441600	3457202	antisense	6
c10	Hcv1.av93.c10.g329.i2	3449412	3452787	Hcv1.av93.c10.g328.i1	3441600	3457202	antisense	5
c10	Hcv1.av93.c10.g329.i2	3449412	3452787	Hcv1.av93.c10.g328.i2	3441600	3457202	antisense	5
c10	Hcv1.av93.c10.g329.i3	3449412	3452787	Hcv1.av93.c10.g328.i1	3441600	3457202	antisense	4
c10	Hcv1.av93.c10.g329.i3	3449412	3452787	Hcv1.av93.c10.g328.i2	3441600	3457202	antisense	4
c10	Hcv1.av93.c10.g336.i1	3605970	3606933	Hcv1.av93.c10.g335.i1	3603631	3611425	antisense	1
c10	Hcv1.av93.c10.g337.i1	3607085	3608997	Hcv1.av93.c10.g335.i1	3603631	3611425	antisense	1
c10	Hcv1.av93.c10.g35.i1	309912	310290	Hcv1.av93.c10.g34.i1	308845	316530	sense	1
c10	Hcv1.av93.c10.g35.i1	309912	310290	Hcv1.av93.c10.g34.i2	308845	316530	sense	1
c10	Hcv1.av93.c10.g357.i1	3919027	3920392	Hcv1.av93.c10.g356.i1	3918854	3922217	antisense	1
c10	Hcv1.av93.c10.g358.i1	3930044	3930627	Hcv1.av93.c10.g356.i1	3927327	3931833	antisense	1
c10	Hcv1.av93.c10.g363.i1	3981509	3982270	Hcv1.av93.c10.g362.i1	3981059	3982543	antisense	1
c10	Hcv1.av93.c10.g363.i1	3981509	3982270	Hcv1.av93.c10.g362.i2	3981059	3982543	antisense	1
c10	Hcv1.av93.c10.g363.i1	3981509	3982270	Hcv1.av93.c10.g362.i3	3981059	3982543	antisense	1
c10	Hcv1.av93.c10.g365.i1	4009588	4016820	Hcv1.av93.c10.g364.i3	4006907	4016900	antisense	11
c10	Hcv1.av93.c10.g365.i2	4009588	4016820	Hcv1.av93.c10.g364.i3	4006907	4016900	antisense	11
c10	Hcv1.av93.c10.g365.i3	4009588	4016820	Hcv1.av93.c10.g364.i3	4006907	4016900	antisense	10
c10	Hcv1.av93.c10.g382.i1	4312101	4314125	Hcv1.av93.c10.g381.i1	4307273	4314964	antisense	1
c10	Hcv1.av93.c10.g383.i1	4318582	4320711	Hcv1.av93.c10.g381.i1	4315984	4323081	sense	2
c10	Hcv1.av93.c10.g386.i1	4354279	4355084	Hcv1.av93.c10.g385.i1	4353663	4355254	sense	1
c10	Hcv1.av93.c10.g386.i1	4354279	4355084	Hcv1.av93.c10.g385.i2	4353663	4355254	sense	1
c10	Hcv1.av93.c10.g39.i1	338475	344030	Hcv1.av93.c10.g38.i1	337584	345372	antisense	12
c10	Hcv1.av93.c10.g39.i1	338475	344030	Hcv1.av93.c10.g38.i2	337584	345372	antisense	12
c10	Hcv1.av93.c10.g39.i1	338475	344030	Hcv1.av93.c10.g38.i3	337584	345372	antisense	12
c10	Hcv1.av93.c10.g39.i1	338475	344030	Hcv1.av93.c10.g38.i4	337584	345372	antisense	12
c10	Hcv1.av93.c10.g391.i1	4423635	4424482	Hcv1.av93.c10.g390.i1	4419588	4431033	sense	3
c10	Hcv1.av93.c10.g401.i1	4481789	4482282	Hcv1.av93.c10.g400.i1	4480375	4482783	sense	2
c10	Hcv1.av93.c10.g401.i1	4481789	4482282	Hcv1.av93.c10.g400.i2	4480375	4482783	sense	2
c10	Hcv1.av93.c10.g401.i1	4481789	4482282	Hcv1.av93.c10.g400.i3	4480375	4487618	sense	2
c10	Hcv1.av93.c10.g401.i1	4481789	4482282	Hcv1.av93.c10.g400.i4	4480375	4487618	sense	2
c10	Hcv1.av93.c10.g404.i1	4520546	4523332	Hcv1.av93.c10.g403.i1	4520130	4524091	antisense	2
c10	Hcv1.av93.c10.g41.i1	365306	365918	Hcv1.av93.c10.g40.i1	363297	369957	sense	1
c10	Hcv1.av93.c10.g41.i1	365306	365918	Hcv1.av93.c10.g40.i2	363297	369957	sense	1
c10	Hcv1.av93.c10.g41.i1	365306	365918	Hcv1.av93.c10.g40.i3	363297	369957	sense	1
c10	Hcv1.av93.c10.g425.i1	4766877	4769196	Hcv1.av93.c10.g424.i1	4766416	4770603	antisense	9
c10	Hcv1.av93.c10.g428.i1	4776430	4779270	Hcv1.av93.c10.g427.i1	4774844	4779402	antisense	2
c10	Hcv1.av93.c10.g43.i1	410433	414288	Hcv1.av93.c10.g42.i1	410203	416171	antisense	6
c10	Hcv1.av93.c10.g436.i1	4868144	4870133	Hcv1.av93.c10.g435.i1	4867663	4880512	sense	6
c10	Hcv1.av93.c10.g437.i1	4870715	4872887	Hcv1.av93.c10.g435.i1	4867663	4880512	antisense	1
c10	Hcv1.av93.c10.g438.i1	4875096	4878700	Hcv1.av93.c10.g435.i1	4867663	4880512	antisense	2
c10	Hcv1.av93.c10.g448.i1	4926704	4928542	Hcv1.av93.c10.g447.i1	4925570	4930973	sense	1
c10	Hcv1.av93.c10.g448.i1	4926704	4928542	Hcv1.av93.c10.g447.i2	4925570	4930973	sense	1
c10	Hcv1.av93.c10.g450.i1	4933633	4937184	Hcv1.av93.c10.g449.i1	4933592	4937608	sense	2
c10	Hcv1.av93.c10.g458.i1	4972904	4976720	Hcv1.av93.c10.g457.i1	4970306	4977894	antisense	2
c10	Hcv1.av93.c10.g458.i1	4972904	4976720	Hcv1.av93.c10.g457.i2	4970306	4977894	antisense	2
c10	Hcv1.av93.c10.g461.i1	4988055	4989297	Hcv1.av93.c10.g460.i1	4987933	4989614	antisense	4
c10	Hcv1.av93.c10.g465.i1	5013611	5017136	Hcv1.av93.c10.g464.i1	5013181	5017185	antisense	3
c10	Hcv1.av93.c10.g465.i1	5013611	5017136	Hcv1.av93.c10.g464.i2	5013181	5017185	antisense	3
c10	Hcv1.av93.c10.g465.i1	5013611	5017136	Hcv1.av93.c10.g464.i3	5013181	5017185	antisense	3
c10	Hcv1.av93.c10.g465.i2	5013611	5017136	Hcv1.av93.c10.g464.i1	5013181	5017185	antisense	4
c10	Hcv1.av93.c10.g465.i2	5013611	5017136	Hcv1.av93.c10.g464.i2	5013181	5017185	antisense	4
c10	Hcv1.av93.c10.g465.i2	5013611	5017136	Hcv1.av93.c10.g464.i3	5013181	5017185	antisense	4
c10	Hcv1.av93.c10.g465.i3	5013611	5017136	Hcv1.av93.c10.g464.i1	5013181	5017185	antisense	4
c10	Hcv1.av93.c10.g465.i3	5013611	5017136	Hcv1.av93.c10.g464.i2	5013181	5017185	antisense	4
c10	Hcv1.av93.c10.g465.i3	5013611	5017136	Hcv1.av93.c10.g464.i3	5013181	5017185	antisense	4
c10	Hcv1.av93.c10.g466.i1	5018726	5019751	Hcv1.av93.c10.g464.i1	5018078	5020021	antisense	2
c10	Hcv1.av93.c10.g466.i1	5018726	5019751	Hcv1.av93.c10.g464.i2	5018078	5020072	antisense	2
c10	Hcv1.av93.c10.g466.i1	5018726	5019751	Hcv1.av93.c10.g464.i3	5018078	5020072	antisense	2
c10	Hcv1.av93.c10.g468.i1	5061289	5061816	Hcv1.av93.c10.g467.i1	5057086	5062180	antisense	2
c10	Hcv1.av93.c10.g469.i1	5068862	5072315	Hcv1.av93.c10.g467.i1	5067737	5072361	sense	1
c10	Hcv1.av93.c10.g470.i1	5081198	5083950	Hcv1.av93.c10.g467.i1	5072428	5087001	sense	1
c10	Hcv1.av93.c10.g475.i1	5106886	5110303	Hcv1.av93.c10.g474.i1	5106180	5117919	sense	3
c10	Hcv1.av93.c10.g479.i1	5147341	5148204	Hcv1.av93.c10.g478.i1	5147269	5153868	sense	1
c10	Hcv1.av93.c10.g480.i1	5149977	5153861	Hcv1.av93.c10.g478.i1	5147269	5153868	antisense	2
c10	Hcv1.av93.c10.g482.i1	5171215	5171898	Hcv1.av93.c10.g481.i1	5164155	5173587	sense	1
c10	Hcv1.av93.c10.g482.i1	5171215	5171898	Hcv1.av93.c10.g481.i2	5164155	5173587	sense	1
c10	Hcv1.av93.c10.g482.i1	5171215	5171898	Hcv1.av93.c10.g481.i3	5164155	5173587	sense	1
c10	Hcv1.av93.c10.g482.i1	5171215	5171898	Hcv1.av93.c10.g481.i4	5164155	5173587	sense	1
c10	Hcv1.av93.c10.g482.i1	5171215	5171898	Hcv1.av93.c10.g481.i5	5164155	5173587	sense	1
c10	Hcv1.av93.c10.g484.i1	5195506	5197042	Hcv1.av93.c10.g483.i1	5195061	5202132	antisense	5
c10	Hcv1.av93.c10.g484.i1	5195506	5197042	Hcv1.av93.c10.g483.i2	5195061	5202132	antisense	5
c10	Hcv1.av93.c10.g484.i1	5195506	5197042	Hcv1.av93.c10.g483.i3	5195061	5202132	antisense	5
c10	Hcv1.av93.c10.g487.i1	5231921	5234142	Hcv1.av93.c10.g486.i1	5231901	5239497	sense	1
c10	Hcv1.av93.c10.g492.i1	5306837	5307079	Hcv1.av93.c10.g491.i1	5303224	5314219	sense	1
c10	Hcv1.av93.c10.g492.i1	5306837	5307079	Hcv1.av93.c10.g491.i2	5303224	5318289	sense	1
c10	Hcv1.av93.c10.g493.i1	5321207	5322480	Hcv1.av93.c10.g491.i1	5320196	5336133	antisense	1
c10	Hcv1.av93.c10.g493.i1	5321207	5322480	Hcv1.av93.c10.g491.i2	5320196	5336133	antisense	1
c10	Hcv1.av93.c10.g50.i1	442237	442874	Hcv1.av93.c10.g49.i1	439724	443506	sense	2
c10	Hcv1.av93.c10.g50.i1	442237	442874	Hcv1.av93.c10.g49.i2	439724	443506	sense	2
c10	Hcv1.av93.c10.g50.i1	442237	442874	Hcv1.av93.c10.g49.i3	439724	443506	sense	2
c10	Hcv1.av93.c10.g518.i1	5538143	5539433	Hcv1.av93.c10.g517.i1	5534451	5540013	antisense	3
c10	Hcv1.av93.c10.g526.i1	5580830	5582910	Hcv1.av93.c10.g525.i1	5579901	5583276	antisense	1
c10	Hcv1.av93.c10.g53.i1	470477	472213	Hcv1.av93.c10.g52.i1	467713	477949	antisense	3
c10	Hcv1.av93.c10.g53.i1	470477	472213	Hcv1.av93.c10.g52.i2	467713	477949	antisense	3
c10	Hcv1.av93.c10.g533.i1	5634218	5635406	Hcv1.av93.c10.g532.i1	5632698	5636606	sense	1
c10	Hcv1.av93.c10.g537.i1	5682336	5683803	Hcv1.av93.c10.g536.i1	5682256	5685033	sense	1
c10	Hcv1.av93.c10.g539.i1	5687718	5689589	Hcv1.av93.c10.g538.i1	5687618	5694192	sense	2
c10	Hcv1.av93.c10.g54.i1	472972	476486	Hcv1.av93.c10.g52.i1	467713	477949	antisense	1
c10	Hcv1.av93.c10.g54.i1	472972	476486	Hcv1.av93.c10.g52.i2	467713	477949	antisense	1
c10	Hcv1.av93.c10.g540.i1	5690148	5692717	Hcv1.av93.c10.g538.i1	5687618	5694192	sense	1
c10	Hcv1.av93.c10.g544.i1	5756869	5757906	Hcv1.av93.c10.g543.i1	5755774	5758143	antisense	1
c10	Hcv1.av93.c10.g544.i1	5756869	5757906	Hcv1.av93.c10.g543.i2	5755774	5758143	antisense	1
c10	Hcv1.av93.c10.g545.i1	5764387	5767812	Hcv1.av93.c10.g543.i1	5759239	5768337	antisense	5
c10	Hcv1.av93.c10.g545.i1	5764387	5767812	Hcv1.av93.c10.g543.i2	5759239	5768337	antisense	5
c10	Hcv1.av93.c10.g55.i1	476859	477916	Hcv1.av93.c10.g52.i1	467713	477949	sense	3
c10	Hcv1.av93.c10.g55.i1	476859	477916	Hcv1.av93.c10.g52.i2	467713	477949	sense	3
c10	Hcv1.av93.c10.g556.i1	5890801	5892268	Hcv1.av93.c10.g555.i1	5888368	5894020	antisense	3
c10	Hcv1.av93.c10.g556.i1	5890801	5892268	Hcv1.av93.c10.g555.i2	5888368	5894020	antisense	3
c10	Hcv1.av93.c10.g556.i1	5890801	5892268	Hcv1.av93.c10.g555.i3	5888368	5894020	antisense	3
c10	Hcv1.av93.c10.g556.i1	5890801	5892268	Hcv1.av93.c10.g555.i4	5888368	5894020	antisense	3
c10	Hcv1.av93.c10.g556.i1	5890801	5892268	Hcv1.av93.c10.g555.i5	5888368	5894020	antisense	3
c10	Hcv1.av93.c10.g559.i1	5921522	5931116	Hcv1.av93.c10.g546.i1	5919848	5935808	sense	7
c10	Hcv1.av93.c10.g560.i1	5931176	5932474	Hcv1.av93.c10.g546.i1	5919848	5935808	sense	3
c10	Hcv1.av93.c10.g560.i2	5931176	5933659	Hcv1.av93.c10.g546.i1	5919848	5935808	sense	4
c10	Hcv1.av93.c10.g563.i1	5944571	5945858	Hcv1.av93.c10.g562.i1	5942765	5946578	sense	1
c10	Hcv1.av93.c10.g566.i1	5975411	5979650	Hcv1.av93.c10.g565.i1	5965085	5982091	sense	1
c10	Hcv1.av93.c10.g570.i1	6017482	6018411	Hcv1.av93.c10.g546.i1	6014049	6021895	antisense	1
c10	Hcv1.av93.c10.g570.i1	6017482	6018411	Hcv1.av93.c10.g569.i1	6016617	6019080	sense	1
c10	Hcv1.av93.c10.g571.i1	6020814	6021669	Hcv1.av93.c10.g546.i1	6014049	6021895	antisense	1
c10	Hcv1.av93.c10.g571.i1	6020814	6021669	Hcv1.av93.c10.g569.i1	6020441	6024480	sense	1
c10	Hcv1.av93.c10.g586.i1	6241653	6242086	Hcv1.av93.c10.g585.i1	6239837	6247486	sense	1
c10	Hcv1.av93.c10.g586.i1	6241653	6242086	Hcv1.av93.c10.g585.i2	6239837	6247486	sense	1
c10	Hcv1.av93.c10.g588.i1	6285911	6287637	Hcv1.av93.c10.g587.i1	6283502	6300532	antisense	1
c10	Hcv1.av93.c10.g588.i1	6285911	6287637	Hcv1.av93.c10.g587.i2	6282198	6289134	antisense	1
c10	Hcv1.av93.c10.g611.i1	6599492	6600034	Hcv1.av93.c10.g609.i1	6597541	6605316	sense	1
c10	Hcv1.av93.c10.g611.i1	6599492	6600034	Hcv1.av93.c10.g609.i2	6597541	6605316	sense	1
c10	Hcv1.av93.c10.g611.i1	6599492	6600034	Hcv1.av93.c10.g610.i1	6599263	6600249	antisense	1
c10	Hcv1.av93.c10.g613.i1	6638318	6638625	Hcv1.av93.c10.g612.i1	6637046	6642554	sense	1
c10	Hcv1.av93.c10.g614.i1	6647367	6648588	Hcv1.av93.c10.g612.i1	6647047	6649569	antisense	4
c10	Hcv1.av93.c10.g62.i1	526833	527927	Hcv1.av93.c10.g60.i1	526703	528336	antisense	1
c10	Hcv1.av93.c10.g62.i1	526833	527927	Hcv1.av93.c10.g60.i2	526703	528336	antisense	1
c10	Hcv1.av93.c10.g62.i1	526833	527927	Hcv1.av93.c10.g61.i1	520287	530721	antisense	1
c10	Hcv1.av93.c10.g623.i1	6729759	6732991	Hcv1.av93.c10.g622.i1	6729701	6734752	antisense	10
c10	Hcv1.av93.c10.g63.i1	529231	530494	Hcv1.av93.c10.g61.i1	520287	530721	sense	1
c10	Hcv1.av93.c10.g639.i1	6940181	6942528	Hcv1.av93.c10.g638.i1	6932233	6942852	antisense	3
c10	Hcv1.av93.c10.g639.i1	6940181	6942528	Hcv1.av93.c10.g638.i2	6932233	6942852	antisense	3
c10	Hcv1.av93.c10.g639.i1	6940181	6942528	Hcv1.av93.c10.g638.i3	6932233	6942852	antisense	3
c10	Hcv1.av93.c10.g639.i1	6940181	6942528	Hcv1.av93.c10.g638.i4	6932233	6942852	antisense	3
c10	Hcv1.av93.c10.g640.i1	6945458	6949273	Hcv1.av93.c10.g638.i1	6944894	6958704	antisense	12
c10	Hcv1.av93.c10.g640.i1	6945458	6949273	Hcv1.av93.c10.g638.i2	6944894	6958704	antisense	12
c10	Hcv1.av93.c10.g640.i1	6945458	6949273	Hcv1.av93.c10.g638.i3	6944894	6958704	antisense	12
c10	Hcv1.av93.c10.g640.i1	6945458	6949273	Hcv1.av93.c10.g638.i4	6944894	6958704	antisense	12
c10	Hcv1.av93.c10.g641.i1	6953091	6958589	Hcv1.av93.c10.g638.i1	6944894	6958704	antisense	14
c10	Hcv1.av93.c10.g641.i1	6953091	6958589	Hcv1.av93.c10.g638.i2	6944894	6958704	antisense	14
c10	Hcv1.av93.c10.g641.i1	6953091	6958589	Hcv1.av93.c10.g638.i3	6944894	6958704	antisense	14
c10	Hcv1.av93.c10.g641.i1	6953091	6958589	Hcv1.av93.c10.g638.i4	6944894	6958704	antisense	14
c10	Hcv1.av93.c10.g641.i2	6953091	6958589	Hcv1.av93.c10.g638.i1	6944894	6958704	antisense	13
c10	Hcv1.av93.c10.g641.i2	6953091	6958589	Hcv1.av93.c10.g638.i2	6944894	6958704	antisense	13
c10	Hcv1.av93.c10.g641.i2	6953091	6958589	Hcv1.av93.c10.g638.i3	6944894	6958704	antisense	13
c10	Hcv1.av93.c10.g641.i2	6953091	6958589	Hcv1.av93.c10.g638.i4	6944894	6958704	antisense	13
c10	Hcv1.av93.c10.g658.i1	7079285	7080776	Hcv1.av93.c10.g657.i1	7078284	7080860	sense	1
c10	Hcv1.av93.c10.g662.i1	7111900	7113426	Hcv1.av93.c10.g661.i1	7110989	7113476	antisense	2
c10	Hcv1.av93.c10.g663.i1	7115877	7117787	Hcv1.av93.c10.g661.i1	7114426	7117862	antisense	3
c10	Hcv1.av93.c10.g666.i1	7157751	7159479	Hcv1.av93.c10.g665.i1	7154263	7160706	antisense	2
c10	Hcv1.av93.c10.g666.i1	7157751	7159479	Hcv1.av93.c10.g665.i2	7154263	7160706	antisense	2
c10	Hcv1.av93.c10.g675.i1	7234434	7235145	Hcv1.av93.c10.g674.i1	7233089	7248948	antisense	1
c10	Hcv1.av93.c10.g675.i1	7234434	7235145	Hcv1.av93.c10.g674.i2	7233089	7248948	antisense	1
c10	Hcv1.av93.c10.g676.i1	7236542	7237215	Hcv1.av93.c10.g674.i1	7233089	7248948	antisense	1
c10	Hcv1.av93.c10.g676.i1	7236542	7237215	Hcv1.av93.c10.g674.i2	7233089	7248948	antisense	1
c10	Hcv1.av93.c10.g677.i1	7237403	7238067	Hcv1.av93.c10.g674.i1	7233089	7248948	antisense	1
c10	Hcv1.av93.c10.g677.i1	7237403	7238067	Hcv1.av93.c10.g674.i2	7233089	7248948	antisense	1
c10	Hcv1.av93.c10.g678.i1	7238262	7241788	Hcv1.av93.c10.g674.i1	7233089	7248948	antisense	5
c10	Hcv1.av93.c10.g678.i1	7238262	7241788	Hcv1.av93.c10.g674.i2	7233089	7248948	antisense	5
c10	Hcv1.av93.c10.g679.i1	7242801	7245627	Hcv1.av93.c10.g674.i1	7233089	7248948	antisense	6
c10	Hcv1.av93.c10.g679.i1	7242801	7245627	Hcv1.av93.c10.g674.i2	7233089	7248948	antisense	6
c10	Hcv1.av93.c10.g679.i2	7242801	7245627	Hcv1.av93.c10.g674.i1	7233089	7248948	antisense	7
c10	Hcv1.av93.c10.g679.i2	7242801	7245627	Hcv1.av93.c10.g674.i2	7233089	7248948	antisense	7
c10	Hcv1.av93.c10.g689.i1	7336994	7339092	Hcv1.av93.c10.g688.i1	7336628	7355411	antisense	2
c10	Hcv1.av93.c10.g724.i1	7625484	7626057	Hcv1.av93.c10.g723.i1	7613785	7628938	antisense	1
c10	Hcv1.av93.c10.g725.i1	7630970	7632882	Hcv1.av93.c10.g723.i1	7629034	7633357	antisense	3
c10	Hcv1.av93.c10.g73.i1	592163	594485	Hcv1.av93.c10.g72.i1	591723	599525	antisense	2
c10	Hcv1.av93.c10.g732.i1	7702845	7703920	Hcv1.av93.c10.g731.i1	7700940	7705494	sense	1
c10	Hcv1.av93.c10.g732.i1	7702845	7703920	Hcv1.av93.c10.g731.i2	7700940	7705494	sense	1
c10	Hcv1.av93.c10.g732.i1	7702845	7703920	Hcv1.av93.c10.g731.i3	7700940	7705494	sense	1
c10	Hcv1.av93.c10.g732.i1	7702845	7703920	Hcv1.av93.c10.g731.i4	7700940	7705494	sense	1
c10	Hcv1.av93.c10.g739.i1	7767162	7768071	Hcv1.av93.c10.g738.i1	7766991	7771254	sense	2
c10	Hcv1.av93.c10.g74.i1	594736	595273	Hcv1.av93.c10.g72.i1	591723	599525	sense	1
c10	Hcv1.av93.c10.g747.i1	7803925	7805117	Hcv1.av93.c10.g746.i1	7803578	7805242	sense	1
c10	Hcv1.av93.c10.g75.i1	595293	598674	Hcv1.av93.c10.g72.i1	591723	599525	sense	2
c10	Hcv1.av93.c10.g755.i1	7937068	7937579	Hcv1.av93.c10.g753.i1	7934007	7940438	sense	1
c10	Hcv1.av93.c10.g756.i1	7943914	7944845	Hcv1.av93.c10.g753.i1	7943499	7945207	sense	2
c10	Hcv1.av93.c10.g759.i1	7969905	7970692	Hcv1.av93.c10.g758.i1	7953491	7973065	antisense	1
c10	Hcv1.av93.c10.g759.i1	7969905	7970692	Hcv1.av93.c10.g758.i2	7953491	7973065	antisense	1
c10	Hcv1.av93.c10.g760.i1	7971354	7972277	Hcv1.av93.c10.g758.i1	7953491	7973065	antisense	1
c10	Hcv1.av93.c10.g760.i1	7971354	7972277	Hcv1.av93.c10.g758.i2	7953491	7973065	antisense	1
c10	Hcv1.av93.c10.g762.i1	8058915	8059775	Hcv1.av93.c10.g758.i1	8052212	8072558	sense	2
c10	Hcv1.av93.c10.g762.i1	8058915	8059775	Hcv1.av93.c10.g758.i2	8052224	8072558	sense	2
c10	Hcv1.av93.c10.g762.i1	8058915	8059775	Hcv1.av93.c10.g761.i1	8042284	8059845	sense	2
c10	Hcv1.av93.c10.g77.i1	627971	629280	Hcv1.av93.c10.g76.i1	626107	629603	sense	2
c10	Hcv1.av93.c10.g77.i1	627971	629280	Hcv1.av93.c10.g76.i2	626107	629603	sense	2
c10	Hcv1.av93.c10.g77.i1	627971	629280	Hcv1.av93.c10.g76.i3	626107	629603	sense	2
c10	Hcv1.av93.c10.g77.i1	627971	629280	Hcv1.av93.c10.g76.i4	626107	629603	sense	2
c10	Hcv1.av93.c10.g77.i1	627971	629280	Hcv1.av93.c10.g76.i5	626107	629603	sense	2
c10	Hcv1.av93.c10.g77.i1	627971	629280	Hcv1.av93.c10.g76.i6	626107	629603	sense	2
c10	Hcv1.av93.c10.g77.i1	627971	629280	Hcv1.av93.c10.g76.i7	626107	629603	sense	2
c10	Hcv1.av93.c10.g77.i1	627971	629280	Hcv1.av93.c10.g76.i8	626107	629603	sense	2
c10	Hcv1.av93.c10.g79.i1	641395	642775	Hcv1.av93.c10.g78.i1	639552	643176	antisense	1
c10	Hcv1.av93.c10.g79.i1	641395	642775	Hcv1.av93.c10.g78.i2	639552	643176	antisense	1
c10	Hcv1.av93.c10.g8.i1	60377	62275	Hcv1.av93.c10.g7.i1	60130	64564	sense	2
c10	Hcv1.av93.c10.g8.i2	60377	62405	Hcv1.av93.c10.g7.i1	60130	64564	sense	2
c10	Hcv1.av93.c10.g9.i1	62531	63594	Hcv1.av93.c10.g7.i1	60130	64564	sense	1
c10	Hcv1.av93.c10.g92.i1	782030	783629	Hcv1.av93.c10.g91.i1	781390	787726	antisense	4
c11	Hcv1.av93.c11.g1002.i1	7550743	7551503	Hcv1.av93.c11.g1000.i1	7547138	7552422	antisense	3
c11	Hcv1.av93.c11.g1006.i1	7586342	7587307	Hcv1.av93.c11.g1005.i1	7585422	7587582	antisense	2
c11	Hcv1.av93.c11.g1006.i1	7586342	7587307	Hcv1.av93.c11.g1005.i2	7585422	7587582	antisense	2
c11	Hcv1.av93.c11.g1022.i1	7644338	7644721	Hcv1.av93.c11.g1021.i1	7642420	7646117	sense	2
c11	Hcv1.av93.c11.g1022.i1	7644338	7644721	Hcv1.av93.c11.g1021.i2	7642420	7646117	sense	2
c11	Hcv1.av93.c11.g1022.i1	7644338	7644721	Hcv1.av93.c11.g1021.i3	7642025	7646590	sense	2
c11	Hcv1.av93.c11.g1032.i1	7696699	7704648	Hcv1.av93.c11.g1031.i1	7696625	7707503	antisense	27
c11	Hcv1.av93.c11.g1033.i1	7705060	7705803	Hcv1.av93.c11.g1031.i1	7696625	7707503	antisense	2
c11	Hcv1.av93.c11.g1038.i1	7736954	7738165	Hcv1.av93.c11.g1037.i1	7735742	7740384	sense	2
c11	Hcv1.av93.c11.g1039.i1	7739438	7739806	Hcv1.av93.c11.g1037.i1	7735742	7740384	sense	1
c11	Hcv1.av93.c11.g1041.i1	7747902	7749810	Hcv1.av93.c11.g1040.i1	7746074	7760474	sense	1
c11	Hcv1.av93.c11.g1042.i1	7749740	7758998	Hcv1.av93.c11.g1040.i1	7746074	7760474	antisense	13
c11	Hcv1.av93.c11.g1057.i1	7972812	7975026	Hcv1.av93.c11.g1056.i1	7969043	7977842	sense	1
c11	Hcv1.av93.c11.g1057.i1	7972812	7975026	Hcv1.av93.c11.g1056.i3	7969043	7977842	sense	1
c11	Hcv1.av93.c11.g1057.i1	7972812	7975026	Hcv1.av93.c11.g1056.i4	7969043	7977842	sense	1
c11	Hcv1.av93.c11.g1057.i1	7972812	7975026	Hcv1.av93.c11.g1056.i5	7969043	7977842	sense	1
c11	Hcv1.av93.c11.g1059.i1	8038085	8039803	Hcv1.av93.c11.g1058.i1	8027670	8045821	antisense	1
c11	Hcv1.av93.c11.g1059.i1	8038085	8039803	Hcv1.av93.c11.g1058.i2	8033225	8045821	antisense	1
c11	Hcv1.av93.c11.g109.i1	853604	853999	Hcv1.av93.c11.g108.i1	844786	858586	sense	2
c11	Hcv1.av93.c11.g112.i1	868932	870044	Hcv1.av93.c11.g111.i1	868505	871216	antisense	1
c11	Hcv1.av93.c11.g113.i1	872328	874214	Hcv1.av93.c11.g111.i1	871688	883906	antisense	5
c11	Hcv1.av93.c11.g114.i1	877910	880707	Hcv1.av93.c11.g111.i1	871688	883906	antisense	5
c11	Hcv1.av93.c11.g124.i1	929435	930025	Hcv1.av93.c11.g122.i1	928574	941922	antisense	1
c11	Hcv1.av93.c11.g124.i1	929435	930025	Hcv1.av93.c11.g123.i1	929008	933655	sense	1
c11	Hcv1.av93.c11.g125.i1	931467	932275	Hcv1.av93.c11.g122.i1	928574	941922	antisense	1
c11	Hcv1.av93.c11.g125.i1	931467	932275	Hcv1.av93.c11.g123.i1	929008	933655	sense	1
c11	Hcv1.av93.c11.g126.i1	932586	933420	Hcv1.av93.c11.g122.i1	928574	941922	antisense	1
c11	Hcv1.av93.c11.g126.i1	932586	933420	Hcv1.av93.c11.g123.i1	929008	933655	sense	1
c11	Hcv1.av93.c11.g127.i1	946109	949590	Hcv1.av93.c11.g123.i1	939820	951808	antisense	8
c11	Hcv1.av93.c11.g135.i1	1031056	1032025	Hcv1.av93.c11.g134.i1	1030812	1032186	sense	1
c11	Hcv1.av93.c11.g137.i1	1051528	1054712	Hcv1.av93.c11.g136.i1	1051022	1062375	sense	1
c11	Hcv1.av93.c11.g137.i1	1051528	1054712	Hcv1.av93.c11.g136.i2	1051022	1062375	sense	1
c11	Hcv1.av93.c11.g137.i1	1051528	1054712	Hcv1.av93.c11.g136.i3	1051022	1062375	sense	1
c11	Hcv1.av93.c11.g137.i1	1051528	1054712	Hcv1.av93.c11.g136.i4	1051022	1062375	sense	1
c11	Hcv1.av93.c11.g137.i1	1051528	1054712	Hcv1.av93.c11.g136.i5	1051022	1062375	sense	1
c11	Hcv1.av93.c11.g138.i1	1055006	1056941	Hcv1.av93.c11.g136.i1	1051022	1062375	sense	2
c11	Hcv1.av93.c11.g138.i1	1055006	1056941	Hcv1.av93.c11.g136.i2	1051022	1062375	sense	2
c11	Hcv1.av93.c11.g138.i1	1055006	1056941	Hcv1.av93.c11.g136.i3	1051022	1062375	sense	2
c11	Hcv1.av93.c11.g138.i1	1055006	1056941	Hcv1.av93.c11.g136.i4	1051022	1062375	sense	2
c11	Hcv1.av93.c11.g138.i1	1055006	1056941	Hcv1.av93.c11.g136.i5	1051022	1062375	sense	2
c11	Hcv1.av93.c11.g139.i1	1057340	1061514	Hcv1.av93.c11.g136.i1	1051022	1062375	sense	1
c11	Hcv1.av93.c11.g139.i1	1057340	1061514	Hcv1.av93.c11.g136.i2	1051022	1062375	sense	1
c11	Hcv1.av93.c11.g139.i1	1057340	1061514	Hcv1.av93.c11.g136.i3	1051022	1062375	sense	1
c11	Hcv1.av93.c11.g139.i1	1057340	1061514	Hcv1.av93.c11.g136.i4	1051022	1062375	sense	1
c11	Hcv1.av93.c11.g139.i1	1057340	1061514	Hcv1.av93.c11.g136.i5	1051022	1062375	sense	1
c11	Hcv1.av93.c11.g140.i1	1065494	1067067	Hcv1.av93.c11.g136.i1	1064722	1067187	antisense	1
c11	Hcv1.av93.c11.g140.i1	1065494	1067067	Hcv1.av93.c11.g136.i2	1064722	1067187	antisense	1
c11	Hcv1.av93.c11.g140.i1	1065494	1067067	Hcv1.av93.c11.g136.i3	1064722	1067187	antisense	1
c11	Hcv1.av93.c11.g140.i1	1065494	1067067	Hcv1.av93.c11.g136.i4	1064722	1067187	antisense	1
c11	Hcv1.av93.c11.g140.i1	1065494	1067067	Hcv1.av93.c11.g136.i5	1064722	1067187	antisense	1
c11	Hcv1.av93.c11.g150.i1	1133544	1134661	Hcv1.av93.c11.g149.i1	1131917	1139862	sense	1
c11	Hcv1.av93.c11.g151.i1	1137039	1138151	Hcv1.av93.c11.g149.i1	1131917	1139862	sense	1
c11	Hcv1.av93.c11.g152.i1	1145219	1145885	Hcv1.av93.c11.g149.i1	1144536	1147740	sense	1
c11	Hcv1.av93.c11.g153.i1	1145921	1146696	Hcv1.av93.c11.g149.i1	1144536	1147740	sense	1
c11	Hcv1.av93.c11.g156.i1	1191044	1192324	Hcv1.av93.c11.g155.i1	1185074	1194179	antisense	1
c11	Hcv1.av93.c11.g17.i1	108157	108722	Hcv1.av93.c11.g16.i1	107541	115422	sense	1
c11	Hcv1.av93.c11.g173.i1	1377841	1380364	Hcv1.av93.c11.g172.i1	1377265	1380572	antisense	4
c11	Hcv1.av93.c11.g173.i1	1377841	1380364	Hcv1.av93.c11.g172.i2	1377265	1380572	antisense	4
c11	Hcv1.av93.c11.g173.i1	1377841	1380364	Hcv1.av93.c11.g172.i3	1377265	1380572	antisense	4
c11	Hcv1.av93.c11.g174.i1	1386346	1388566	Hcv1.av93.c11.g172.i1	1385560	1392560	sense	2
c11	Hcv1.av93.c11.g174.i1	1386346	1388566	Hcv1.av93.c11.g172.i2	1385560	1392560	sense	2
c11	Hcv1.av93.c11.g174.i1	1386346	1388566	Hcv1.av93.c11.g172.i3	1385560	1392560	sense	2
c11	Hcv1.av93.c11.g18.i1	110646	114520	Hcv1.av93.c11.g16.i1	107541	115422	sense	8
c11	Hcv1.av93.c11.g18.i2	110646	114520	Hcv1.av93.c11.g16.i1	107541	115422	sense	7
c11	Hcv1.av93.c11.g186.i1	1438925	1441768	Hcv1.av93.c11.g185.i1	1438858	1441956	sense	3
c11	Hcv1.av93.c11.g190.i1	1470631	1472859	Hcv1.av93.c11.g188.i1	1470262	1473622	sense	1
c11	Hcv1.av93.c11.g192.i1	1478951	1479278	Hcv1.av93.c11.g191.i1	1475662	1482347	sense	2
c11	Hcv1.av93.c11.g202.i1	1584941	1586372	Hcv1.av93.c11.g201.i1	1584863	1588716	antisense	2
c11	Hcv1.av93.c11.g202.i1	1584941	1586372	Hcv1.av93.c11.g201.i2	1584863	1588716	antisense	2
c11	Hcv1.av93.c11.g203.i1	1599693	1600375	Hcv1.av93.c11.g201.i1	1599051	1602155	sense	1
c11	Hcv1.av93.c11.g203.i1	1599693	1600375	Hcv1.av93.c11.g201.i2	1599051	1602155	sense	1
c11	Hcv1.av93.c11.g206.i1	1620362	1624741	Hcv1.av93.c11.g205.i1	1615221	1630400	antisense	8
c11	Hcv1.av93.c11.g207.i1	1626031	1626694	Hcv1.av93.c11.g205.i1	1615221	1630400	sense	1
c11	Hcv1.av93.c11.g208.i1	1646730	1647950	Hcv1.av93.c11.g205.i1	1645116	1648557	sense	1
c11	Hcv1.av93.c11.g211.i1	1654948	1655589	Hcv1.av93.c11.g210.i1	1653088	1657551	sense	2
c11	Hcv1.av93.c11.g215.i1	1679089	1682645	Hcv1.av93.c11.g213.i1	1678876	1688772	sense	1
c11	Hcv1.av93.c11.g216.i1	1685372	1688697	Hcv1.av93.c11.g213.i1	1678876	1688772	sense	10
c11	Hcv1.av93.c11.g216.i2	1685372	1688697	Hcv1.av93.c11.g213.i1	1678876	1688772	sense	10
c11	Hcv1.av93.c11.g220.i1	1708459	1709282	Hcv1.av93.c11.g219.i1	1708334	1710285	antisense	1
c11	Hcv1.av93.c11.g221.i1	1721937	1722977	Hcv1.av93.c11.g219.i1	1711418	1723643	sense	1
c11	Hcv1.av93.c11.g235.i1	1830646	1831998	Hcv1.av93.c11.g234.i1	1830139	1832932	antisense	3
c11	Hcv1.av93.c11.g244.i1	1882319	1883619	Hcv1.av93.c11.g243.i1	1882272	1884814	antisense	1
c11	Hcv1.av93.c11.g244.i1	1882319	1883619	Hcv1.av93.c11.g243.i2	1882272	1884814	antisense	1
c11	Hcv1.av93.c11.g244.i1	1882319	1883619	Hcv1.av93.c11.g243.i3	1882272	1884814	antisense	1
c11	Hcv1.av93.c11.g261.i1	2005541	2013967	Hcv1.av93.c11.g260.i1	2002017	2018749	antisense	9
c11	Hcv1.av93.c11.g261.i1	2005541	2013967	Hcv1.av93.c11.g260.i2	2002017	2018749	antisense	9
c11	Hcv1.av93.c11.g262.i1	2014609	2018547	Hcv1.av93.c11.g260.i1	2002017	2018749	antisense	4
c11	Hcv1.av93.c11.g262.i1	2014609	2018547	Hcv1.av93.c11.g260.i2	2002017	2018749	antisense	4
c11	Hcv1.av93.c11.g28.i1	209549	209894	Hcv1.av93.c11.g27.i2	203491	221872	sense	1
c11	Hcv1.av93.c11.g280.i1	2128066	2129413	Hcv1.av93.c11.g279.i1	2127824	2131349	sense	1
c11	Hcv1.av93.c11.g280.i1	2128066	2129413	Hcv1.av93.c11.g279.i2	2127824	2131349	sense	1
c11	Hcv1.av93.c11.g280.i1	2128066	2129413	Hcv1.av93.c11.g279.i3	2127824	2131349	sense	1
c11	Hcv1.av93.c11.g280.i1	2128066	2129413	Hcv1.av93.c11.g279.i4	2127824	2131349	sense	1
c11	Hcv1.av93.c11.g283.i1	2164628	2165806	Hcv1.av93.c11.g282.i1	2164071	2166635	antisense	4
c11	Hcv1.av93.c11.g29.i1	215656	216523	Hcv1.av93.c11.g27.i2	203491	221872	sense	1
c11	Hcv1.av93.c11.g301.i1	2318603	2319876	Hcv1.av93.c11.g300.i1	2318584	2320137	sense	3
c11	Hcv1.av93.c11.g311.i1	2414613	2416273	Hcv1.av93.c11.g310.i1	2413873	2425196	sense	1
c11	Hcv1.av93.c11.g311.i1	2414613	2416273	Hcv1.av93.c11.g310.i2	2413873	2425196	sense	1
c11	Hcv1.av93.c11.g312.i1	2418186	2420111	Hcv1.av93.c11.g310.i1	2413873	2425196	sense	1
c11	Hcv1.av93.c11.g312.i1	2418186	2420111	Hcv1.av93.c11.g310.i2	2413873	2425196	sense	1
c11	Hcv1.av93.c11.g315.i1	2437255	2440075	Hcv1.av93.c11.g314.i1	2436822	2451936	antisense	1
c11	Hcv1.av93.c11.g32.i1	226293	233003	Hcv1.av93.c11.g31.i1	222508	235957	sense	5
c11	Hcv1.av93.c11.g324.i1	2514863	2516588	Hcv1.av93.c11.g323.i1	2513569	2518719	sense	5
c11	Hcv1.av93.c11.g328.i1	2547810	2551281	Hcv1.av93.c11.g327.i1	2547321	2551394	antisense	8
c11	Hcv1.av93.c11.g328.i1	2547810	2551281	Hcv1.av93.c11.g327.i2	2547321	2551394	antisense	8
c11	Hcv1.av93.c11.g328.i1	2547810	2551281	Hcv1.av93.c11.g327.i3	2547321	2551394	antisense	8
c11	Hcv1.av93.c11.g328.i2	2548019	2551281	Hcv1.av93.c11.g327.i1	2547321	2551394	antisense	7
c11	Hcv1.av93.c11.g328.i2	2548019	2551281	Hcv1.av93.c11.g327.i2	2547321	2551394	antisense	7
c11	Hcv1.av93.c11.g328.i2	2548019	2551281	Hcv1.av93.c11.g327.i3	2547321	2551394	antisense	7
c11	Hcv1.av93.c11.g329.i1	2554730	2559938	Hcv1.av93.c11.g327.i1	2554234	2559949	antisense	13
c11	Hcv1.av93.c11.g329.i1	2554730	2559938	Hcv1.av93.c11.g327.i2	2554234	2559949	antisense	13
c11	Hcv1.av93.c11.g329.i1	2554730	2559938	Hcv1.av93.c11.g327.i3	2554234	2559949	antisense	13
c11	Hcv1.av93.c11.g33.i1	229259	230632	Hcv1.av93.c11.g31.i1	222508	235957	antisense	3
c11	Hcv1.av93.c11.g33.i1	229259	230632	Hcv1.av93.c11.g32.i1	227427	231157	antisense	3
c11	Hcv1.av93.c11.g338.i1	2624870	2628953	Hcv1.av93.c11.g337.i1	2624376	2629524	antisense	6
c11	Hcv1.av93.c11.g340.i1	2649357	2650761	Hcv1.av93.c11.g339.i1	2647531	2656889	sense	1
c11	Hcv1.av93.c11.g347.i1	2679782	2682350	Hcv1.av93.c11.g346.i1	2679088	2682503	sense	1
c11	Hcv1.av93.c11.g354.i1	2719379	2720845	Hcv1.av93.c11.g353.i1	2719417	2722512	antisense	2
c11	Hcv1.av93.c11.g354.i1	2719379	2720845	Hcv1.av93.c11.g353.i2	2719417	2722512	antisense	2
c11	Hcv1.av93.c11.g356.i1	2740628	2741781	Hcv1.av93.c11.g355.i1	2740398	2742787	sense	2
c11	Hcv1.av93.c11.g364.i1	2838360	2839338	Hcv1.av93.c11.g363.i1	2837187	2841563	sense	1
c11	Hcv1.av93.c11.g378.i1	2928655	2930331	Hcv1.av93.c11.g377.i1	2925007	2935248	antisense	4
c11	Hcv1.av93.c11.g378.i1	2928655	2930331	Hcv1.av93.c11.g377.i2	2925007	2935248	antisense	4
c11	Hcv1.av93.c11.g378.i1	2928655	2930331	Hcv1.av93.c11.g377.i3	2926754	2935248	antisense	4
c11	Hcv1.av93.c11.g378.i2	2928655	2930331	Hcv1.av93.c11.g377.i1	2925007	2935248	antisense	3
c11	Hcv1.av93.c11.g378.i2	2928655	2930331	Hcv1.av93.c11.g377.i2	2925007	2935248	antisense	3
c11	Hcv1.av93.c11.g378.i2	2928655	2930331	Hcv1.av93.c11.g377.i3	2926754	2935248	antisense	3
c11	Hcv1.av93.c11.g384.i1	2977929	2983933	Hcv1.av93.c11.g383.i1	2973941	2983170	antisense	8
c11	Hcv1.av93.c11.g384.i1	2977929	2983933	Hcv1.av93.c11.g383.i2	2973941	2983170	antisense	8
c11	Hcv1.av93.c11.g384.i1	2977929	2983933	Hcv1.av93.c11.g383.i3	2973941	2983170	antisense	8
c11	Hcv1.av93.c11.g384.i2	2977929	2983933	Hcv1.av93.c11.g383.i1	2973941	2983170	antisense	8
c11	Hcv1.av93.c11.g384.i2	2977929	2983933	Hcv1.av93.c11.g383.i2	2973941	2983170	antisense	8
c11	Hcv1.av93.c11.g384.i2	2977929	2983933	Hcv1.av93.c11.g383.i3	2973941	2983170	antisense	8
c11	Hcv1.av93.c11.g396.i1	3098963	3100091	Hcv1.av93.c11.g395.i1	3097298	3100520	antisense	4
c11	Hcv1.av93.c11.g396.i1	3098963	3100091	Hcv1.av93.c11.g395.i2	3097298	3100520	antisense	4
c11	Hcv1.av93.c11.g397.i1	3102519	3104200	Hcv1.av93.c11.g395.i1	3102510	3104666	sense	1
c11	Hcv1.av93.c11.g397.i1	3102519	3104200	Hcv1.av93.c11.g395.i2	3102510	3104666	sense	1
c11	Hcv1.av93.c11.g401.i1	3138927	3141428	Hcv1.av93.c11.g400.i1	3138093	3141752	sense	1
c11	Hcv1.av93.c11.g404.i1	3185836	3186380	Hcv1.av93.c11.g403.i1	3184935	3190570	sense	1
c11	Hcv1.av93.c11.g405.i1	3187845	3188551	Hcv1.av93.c11.g403.i1	3184935	3190570	antisense	3
c11	Hcv1.av93.c11.g406.i1	3202346	3205899	Hcv1.av93.c11.g403.i1	3201634	3212972	antisense	7
c11	Hcv1.av93.c11.g406.i2	3202346	3205899	Hcv1.av93.c11.g403.i1	3201634	3212972	antisense	7
c11	Hcv1.av93.c11.g406.i3	3202346	3205899	Hcv1.av93.c11.g403.i1	3201634	3212972	antisense	6
c11	Hcv1.av93.c11.g407.i1	3207636	3211531	Hcv1.av93.c11.g403.i1	3201634	3212972	antisense	8
c11	Hcv1.av93.c11.g408.i1	3215117	3217499	Hcv1.av93.c11.g403.i1	3214248	3221696	sense	3
c11	Hcv1.av93.c11.g412.i1	3242272	3243095	Hcv1.av93.c11.g411.i1	3240551	3243363	sense	3
c11	Hcv1.av93.c11.g417.i1	3273608	3275130	Hcv1.av93.c11.g416.i1	3272186	3275478	antisense	2
c11	Hcv1.av93.c11.g42.i1	282081	282702	Hcv1.av93.c11.g41.i1	282079	286333	sense	1
c11	Hcv1.av93.c11.g427.i1	3377839	3379846	Hcv1.av93.c11.g426.i1	3373547	3379908	antisense	2
c11	Hcv1.av93.c11.g438.i1	3497307	3498196	Hcv1.av93.c11.g436.i1	3489044	3499666	sense	1
c11	Hcv1.av93.c11.g438.i1	3497307	3498196	Hcv1.av93.c11.g436.i2	3489044	3499666	sense	1
c11	Hcv1.av93.c11.g438.i1	3497307	3498196	Hcv1.av93.c11.g437.i1	3492371	3500754	sense	1
c11	Hcv1.av93.c11.g455.i1	3624059	3625282	Hcv1.av93.c11.g454.i1	3621975	3626462	sense	1
c11	Hcv1.av93.c11.g456.i1	3627414	3627929	Hcv1.av93.c11.g454.i1	3627049	3628352	sense	1
c11	Hcv1.av93.c11.g46.i1	324678	330327	Hcv1.av93.c11.g45.i1	324077	335408	antisense	8
c11	Hcv1.av93.c11.g46.i1	324678	330327	Hcv1.av93.c11.g45.i2	324077	335408	antisense	8
c11	Hcv1.av93.c11.g46.i2	324678	330877	Hcv1.av93.c11.g45.i1	324077	335408	antisense	8
c11	Hcv1.av93.c11.g46.i2	324678	330877	Hcv1.av93.c11.g45.i2	324077	335408	antisense	8
c11	Hcv1.av93.c11.g465.i1	3695815	3696927	Hcv1.av93.c11.g464.i1	3694743	3699120	antisense	3
c11	Hcv1.av93.c11.g465.i1	3695815	3696927	Hcv1.av93.c11.g464.i2	3694743	3699120	antisense	3
c11	Hcv1.av93.c11.g465.i1	3695815	3696927	Hcv1.av93.c11.g464.i3	3694743	3699120	antisense	3
c11	Hcv1.av93.c11.g47.i1	337059	339111	Hcv1.av93.c11.g45.i1	336619	340501	antisense	3
c11	Hcv1.av93.c11.g47.i1	337059	339111	Hcv1.av93.c11.g45.i2	336619	340501	antisense	3
c11	Hcv1.av93.c11.g472.i1	3754289	3756176	Hcv1.av93.c11.g471.i1	3753991	3756680	sense	1
c11	Hcv1.av93.c11.g478.i1	3789637	3791507	Hcv1.av93.c11.g477.i1	3786809	3791753	antisense	1
c11	Hcv1.av93.c11.g490.i1	3872579	3876687	Hcv1.av93.c11.g489.i1	3872128	3880087	antisense	1
c11	Hcv1.av93.c11.g491.i1	3876745	3877460	Hcv1.av93.c11.g489.i1	3872128	3880087	antisense	1
c11	Hcv1.av93.c11.g502.i1	3937217	3938936	Hcv1.av93.c11.g501.i1	3930445	3939478	sense	1
c11	Hcv1.av93.c11.g508.i1	4038259	4039281	Hcv1.av93.c11.g507.i1	4037677	4040041	sense	1
c11	Hcv1.av93.c11.g517.i1	4102303	4103156	Hcv1.av93.c11.g511.i1	4099036	4105859	sense	2
c11	Hcv1.av93.c11.g521.i1	4139258	4141068	Hcv1.av93.c11.g520.i1	4139237	4141750	antisense	6
c11	Hcv1.av93.c11.g521.i1	4139258	4141068	Hcv1.av93.c11.g520.i2	4139237	4141750	antisense	6
c11	Hcv1.av93.c11.g525.i1	4204190	4205257	Hcv1.av93.c11.g524.i1	4203294	4209055	sense	1
c11	Hcv1.av93.c11.g525.i1	4204190	4205257	Hcv1.av93.c11.g524.i2	4203818	4209055	sense	1
c11	Hcv1.av93.c11.g532.i1	4238862	4240961	Hcv1.av93.c11.g531.i1	4237166	4252620	antisense	3
c11	Hcv1.av93.c11.g532.i2	4238862	4240961	Hcv1.av93.c11.g531.i1	4237166	4252620	antisense	2
c11	Hcv1.av93.c11.g532.i3	4238862	4245568	Hcv1.av93.c11.g531.i1	4237166	4252620	antisense	4
c11	Hcv1.av93.c11.g533.i1	4238862	4245545	Hcv1.av93.c11.g531.i1	4237166	4252620	antisense	4
c11	Hcv1.av93.c11.g538.i1	4276057	4278109	Hcv1.av93.c11.g537.i1	4275915	4279020	antisense	4
c11	Hcv1.av93.c11.g538.i1	4276057	4278109	Hcv1.av93.c11.g537.i2	4275915	4279020	antisense	4
c11	Hcv1.av93.c11.g539.i1	4280246	4282888	Hcv1.av93.c11.g537.i1	4280061	4284846	antisense	3
c11	Hcv1.av93.c11.g539.i1	4280246	4282888	Hcv1.av93.c11.g537.i2	4280061	4284846	antisense	3
c11	Hcv1.av93.c11.g544.i1	4314779	4317088	Hcv1.av93.c11.g543.i1	4312486	4327603	sense	1
c11	Hcv1.av93.c11.g545.i1	4318794	4320074	Hcv1.av93.c11.g543.i1	4312486	4327603	sense	1
c11	Hcv1.av93.c11.g548.i1	4342521	4344376	Hcv1.av93.c11.g547.i1	4337942	4351407	sense	4
c11	Hcv1.av93.c11.g548.i2	4342521	4344376	Hcv1.av93.c11.g547.i1	4337942	4351407	sense	3
c11	Hcv1.av93.c11.g549.i1	4344558	4347219	Hcv1.av93.c11.g547.i1	4337942	4351407	sense	6
c11	Hcv1.av93.c11.g549.i2	4344558	4347219	Hcv1.av93.c11.g547.i1	4337942	4351407	sense	7
c11	Hcv1.av93.c11.g549.i3	4344558	4347219	Hcv1.av93.c11.g547.i1	4337942	4351407	sense	3
c11	Hcv1.av93.c11.g549.i4	4344558	4347219	Hcv1.av93.c11.g547.i1	4337942	4351407	sense	4
c11	Hcv1.av93.c11.g55.i1	358496	359311	Hcv1.av93.c11.g54.i1	358227	360103	antisense	3
c11	Hcv1.av93.c11.g55.i1	358496	359311	Hcv1.av93.c11.g54.i2	358227	360103	antisense	3
c11	Hcv1.av93.c11.g551.i1	4352190	4355589	Hcv1.av93.c11.g550.i1	4351220	4358182	sense	6
c11	Hcv1.av93.c11.g552.i1	4359300	4361456	Hcv1.av93.c11.g550.i1	4358690	4366180	antisense	5
c11	Hcv1.av93.c11.g553.i1	4364213	4365145	Hcv1.av93.c11.g550.i1	4358690	4366180	antisense	1
c11	Hcv1.av93.c11.g565.i1	4470613	4471345	Hcv1.av93.c11.g564.i1	4470471	4472556	antisense	1
c11	Hcv1.av93.c11.g565.i1	4470613	4471345	Hcv1.av93.c11.g564.i2	4470471	4472556	antisense	1
c11	Hcv1.av93.c11.g57.i1	364331	366586	Hcv1.av93.c11.g56.i1	363664	368233	antisense	1
c11	Hcv1.av93.c11.g571.i1	4517976	4520695	Hcv1.av93.c11.g570.i1	4516871	4521165	antisense	3
c11	Hcv1.av93.c11.g576.i1	4561617	4562066	Hcv1.av93.c11.g575.i1	4559923	4573591	sense	1
c11	Hcv1.av93.c11.g576.i1	4561617	4562066	Hcv1.av93.c11.g575.i2	4559923	4573591	sense	1
c11	Hcv1.av93.c11.g577.i1	4571809	4572885	Hcv1.av93.c11.g575.i1	4559923	4573591	sense	1
c11	Hcv1.av93.c11.g577.i1	4571809	4572885	Hcv1.av93.c11.g575.i2	4559923	4573591	sense	1
c11	Hcv1.av93.c11.g58.i1	367136	367630	Hcv1.av93.c11.g56.i1	363664	368233	antisense	1
c11	Hcv1.av93.c11.g583.i1	4605291	4606893	Hcv1.av93.c11.g582.i1	4604936	4616155	antisense	1
c11	Hcv1.av93.c11.g584.i1	4610377	4613189	Hcv1.av93.c11.g582.i1	4604936	4616155	antisense	7
c11	Hcv1.av93.c11.g587.i1	4640285	4640862	Hcv1.av93.c11.g586.i1	4639762	4642893	sense	1
c11	Hcv1.av93.c11.g587.i1	4640285	4640862	Hcv1.av93.c11.g586.i2	4639762	4642893	sense	1
c11	Hcv1.av93.c11.g595.i1	4765719	4766482	Hcv1.av93.c11.g594.i1	4761749	4773384	sense	1
c11	Hcv1.av93.c11.g595.i1	4765719	4766482	Hcv1.av93.c11.g594.i2	4761749	4773384	sense	1
c11	Hcv1.av93.c11.g595.i1	4765719	4766482	Hcv1.av93.c11.g594.i3	4761749	4773384	sense	1
c11	Hcv1.av93.c11.g595.i1	4765719	4766482	Hcv1.av93.c11.g594.i4	4761749	4773384	sense	1
c11	Hcv1.av93.c11.g596.i1	4770444	4772209	Hcv1.av93.c11.g594.i1	4761749	4773384	antisense	1
c11	Hcv1.av93.c11.g596.i1	4770444	4772209	Hcv1.av93.c11.g594.i2	4761749	4773384	antisense	1
c11	Hcv1.av93.c11.g596.i1	4770444	4772209	Hcv1.av93.c11.g594.i3	4761749	4773384	antisense	1
c11	Hcv1.av93.c11.g596.i1	4770444	4772209	Hcv1.av93.c11.g594.i4	4761749	4773384	antisense	1
c11	Hcv1.av93.c11.g601.i1	4843954	4845563	Hcv1.av93.c11.g597.i1	4842534	4845988	sense	1
c11	Hcv1.av93.c11.g601.i1	4843954	4845563	Hcv1.av93.c11.g597.i2	4842534	4845988	sense	1
c11	Hcv1.av93.c11.g601.i1	4843954	4845563	Hcv1.av93.c11.g597.i4	4842534	4845988	sense	1
c11	Hcv1.av93.c11.g608.i1	4881986	4884211	Hcv1.av93.c11.g607.i1	4880237	4887155	sense	1
c11	Hcv1.av93.c11.g609.i1	4884283	4887076	Hcv1.av93.c11.g607.i1	4880237	4887155	sense	2
c11	Hcv1.av93.c11.g61.i1	378542	380288	Hcv1.av93.c11.g60.i1	378402	384797	antisense	2
c11	Hcv1.av93.c11.g61.i1	378542	380288	Hcv1.av93.c11.g60.i2	378402	384797	antisense	2
c11	Hcv1.av93.c11.g61.i1	378542	380288	Hcv1.av93.c11.g60.i3	378402	384797	antisense	2
c11	Hcv1.av93.c11.g61.i1	378542	380288	Hcv1.av93.c11.g60.i4	378402	384797	antisense	2
c11	Hcv1.av93.c11.g613.i1	4897283	4899238	Hcv1.av93.c11.g612.i1	4897125	4914525	sense	1
c11	Hcv1.av93.c11.g614.i1	4906752	4911239	Hcv1.av93.c11.g612.i1	4897125	4914525	sense	2
c11	Hcv1.av93.c11.g629.i1	5004126	5015200	Hcv1.av93.c11.g628.i1	4997131	5015548	sense	2
c11	Hcv1.av93.c11.g654.i1	5216297	5217031	Hcv1.av93.c11.g653.i1	5208256	5218024	sense	1
c11	Hcv1.av93.c11.g658.i1	5244868	5245514	Hcv1.av93.c11.g657.i1	5242124	5248766	sense	1
c11	Hcv1.av93.c11.g662.i1	5282772	5286325	Hcv1.av93.c11.g661.i1	5282329	5288109	sense	1
c11	Hcv1.av93.c11.g663.i1	5291945	5294779	Hcv1.av93.c11.g661.i1	5289553	5296555	antisense	2
c11	Hcv1.av93.c11.g663.i1	5291945	5294779	Hcv1.av93.c11.g661.i2	5291707	5302469	antisense	2
c11	Hcv1.av93.c11.g664.i1	5297132	5299910	Hcv1.av93.c11.g661.i1	5296932	5302469	antisense	2
c11	Hcv1.av93.c11.g664.i1	5297132	5299910	Hcv1.av93.c11.g661.i2	5291707	5302469	antisense	2
c11	Hcv1.av93.c11.g666.i1	5310901	5316007	Hcv1.av93.c11.g665.i1	5307816	5316206	antisense	2
c11	Hcv1.av93.c11.g666.i1	5310901	5316007	Hcv1.av93.c11.g665.i2	5307816	5316206	antisense	2
c11	Hcv1.av93.c11.g672.i1	5343733	5344149	Hcv1.av93.c11.g670.i1	5341179	5344968	antisense	1
c11	Hcv1.av93.c11.g672.i1	5343733	5344149	Hcv1.av93.c11.g671.i1	5342819	5354255	antisense	1
c11	Hcv1.av93.c11.g673.i1	5348777	5349999	Hcv1.av93.c11.g671.i1	5342819	5354255	sense	1
c11	Hcv1.av93.c11.g678.i1	5400375	5400878	Hcv1.av93.c11.g677.i1	5399759	5402077	antisense	1
c11	Hcv1.av93.c11.g678.i1	5400375	5400878	Hcv1.av93.c11.g677.i2	5399759	5402077	antisense	1
c11	Hcv1.av93.c11.g679.i1	5402961	5404038	Hcv1.av93.c11.g677.i1	5402167	5404208	antisense	1
c11	Hcv1.av93.c11.g679.i1	5402961	5404038	Hcv1.av93.c11.g677.i2	5402167	5404208	antisense	1
c11	Hcv1.av93.c11.g683.i1	5426873	5429216	Hcv1.av93.c11.g682.i1	5421496	5432618	antisense	8
c11	Hcv1.av93.c11.g683.i1	5426873	5429216	Hcv1.av93.c11.g682.i2	5421496	5432618	antisense	8
c11	Hcv1.av93.c11.g683.i1	5426873	5429216	Hcv1.av93.c11.g682.i3	5421496	5432618	antisense	8
c11	Hcv1.av93.c11.g686.i1	5447129	5448220	Hcv1.av93.c11.g685.i1	5446701	5449951	sense	1
c11	Hcv1.av93.c11.g686.i1	5447129	5448220	Hcv1.av93.c11.g685.i2	5446701	5449951	sense	1
c11	Hcv1.av93.c11.g689.i1	5470658	5471782	Hcv1.av93.c11.g688.i1	5469675	5471902	sense	1
c11	Hcv1.av93.c11.g689.i1	5470658	5471782	Hcv1.av93.c11.g688.i2	5469675	5471902	sense	1
c11	Hcv1.av93.c11.g689.i1	5470658	5471782	Hcv1.av93.c11.g688.i3	5469675	5471902	sense	1
c11	Hcv1.av93.c11.g689.i1	5470658	5471782	Hcv1.av93.c11.g688.i4	5469675	5471902	sense	1
c11	Hcv1.av93.c11.g689.i1	5470658	5471782	Hcv1.av93.c11.g688.i5	5469675	5471902	sense	1
c11	Hcv1.av93.c11.g692.i1	5496510	5497401	Hcv1.av93.c11.g691.i1	5492543	5497863	antisense	4
c11	Hcv1.av93.c11.g696.i1	5510566	5520567	Hcv1.av93.c11.g694.i1	5505379	5521013	antisense	10
c11	Hcv1.av93.c11.g696.i1	5510566	5520567	Hcv1.av93.c11.g695.i1	5505379	5521013	antisense	10
c11	Hcv1.av93.c11.g696.i1	5510566	5520567	Hcv1.av93.c11.g695.i2	5505379	5521013	antisense	10
c11	Hcv1.av93.c11.g697.i1	5523763	5525564	Hcv1.av93.c11.g694.i1	5522272	5529888	sense	1
c11	Hcv1.av93.c11.g697.i1	5523763	5525564	Hcv1.av93.c11.g695.i1	5522272	5529888	sense	1
c11	Hcv1.av93.c11.g697.i1	5523763	5525564	Hcv1.av93.c11.g695.i2	5522272	5529888	sense	1
c11	Hcv1.av93.c11.g7.i1	46854	48503	Hcv1.av93.c11.g6.i1	46434	50582	antisense	2
c11	Hcv1.av93.c11.g7.i1	46854	48503	Hcv1.av93.c11.g6.i2	46434	50582	antisense	2
c11	Hcv1.av93.c11.g708.i1	5582164	5583575	Hcv1.av93.c11.g707.i1	5581919	5584049	antisense	3
c11	Hcv1.av93.c11.g709.i1	5584920	5586477	Hcv1.av93.c11.g707.i1	5584838	5590503	antisense	1
c11	Hcv1.av93.c11.g713.i1	5604411	5606276	Hcv1.av93.c11.g712.i1	5604334	5606646	antisense	1
c11	Hcv1.av93.c11.g713.i1	5604411	5606276	Hcv1.av93.c11.g712.i2	5604334	5606646	antisense	1
c11	Hcv1.av93.c11.g716.i1	5621671	5625526	Hcv1.av93.c11.g715.i1	5619259	5627893	antisense	2
c11	Hcv1.av93.c11.g721.i1	5655221	5658699	Hcv1.av93.c11.g720.i1	5655049	5659076	antisense	7
c11	Hcv1.av93.c11.g723.i1	5670291	5670821	Hcv1.av93.c11.g722.i1	5669667	5672817	antisense	1
c11	Hcv1.av93.c11.g726.i1	5682967	5686087	Hcv1.av93.c11.g725.i1	5683254	5686313	antisense	4
c11	Hcv1.av93.c11.g73.i1	460895	464457	Hcv1.av93.c11.g72.i1	460366	474257	antisense	2
c11	Hcv1.av93.c11.g73.i1	460895	464457	Hcv1.av93.c11.g72.i2	460366	474257	antisense	2
c11	Hcv1.av93.c11.g74.i1	475147	477651	Hcv1.av93.c11.g72.i1	474273	483518	antisense	4
c11	Hcv1.av93.c11.g74.i1	475147	477651	Hcv1.av93.c11.g72.i2	474273	483518	antisense	4
c11	Hcv1.av93.c11.g744.i1	5824812	5826751	Hcv1.av93.c11.g743.i1	5824797	5829061	antisense	2
c11	Hcv1.av93.c11.g749.i1	5851976	5853338	Hcv1.av93.c11.g748.i1	5851549	5853761	antisense	3
c11	Hcv1.av93.c11.g749.i1	5851976	5853338	Hcv1.av93.c11.g748.i2	5851549	5853761	antisense	3
c11	Hcv1.av93.c11.g749.i2	5852147	5853338	Hcv1.av93.c11.g748.i1	5851549	5853761	antisense	4
c11	Hcv1.av93.c11.g749.i2	5852147	5853338	Hcv1.av93.c11.g748.i2	5851549	5853761	antisense	4
c11	Hcv1.av93.c11.g75.i1	484885	491047	Hcv1.av93.c11.g72.i1	484839	491308	antisense	3
c11	Hcv1.av93.c11.g75.i1	484885	491047	Hcv1.av93.c11.g72.i2	484839	491308	antisense	3
c11	Hcv1.av93.c11.g769.i1	6000030	6001632	Hcv1.av93.c11.g768.i1	5998596	6003272	sense	1
c11	Hcv1.av93.c11.g771.i1	6008804	6012078	Hcv1.av93.c11.g770.i1	6008784	6012397	antisense	9
c11	Hcv1.av93.c11.g776.i1	6039040	6039873	Hcv1.av93.c11.g775.i1	6035563	6040165	sense	2
c11	Hcv1.av93.c11.g783.i1	6080173	6081186	Hcv1.av93.c11.g782.i1	6076424	6081726	antisense	1
c11	Hcv1.av93.c11.g784.i1	6085834	6086569	Hcv1.av93.c11.g782.i1	6085022	6086727	antisense	3
c11	Hcv1.av93.c11.g789.i1	6113363	6114700	Hcv1.av93.c11.g757.i1	6112446	6115415	antisense	1
c11	Hcv1.av93.c11.g791.i1	6127273	6129436	Hcv1.av93.c11.g790.i1	6127017	6129680	antisense	4
c11	Hcv1.av93.c11.g800.i1	6232689	6234555	Hcv1.av93.c11.g799.i1	6230578	6234699	sense	1
c11	Hcv1.av93.c11.g809.i1	6270924	6272062	Hcv1.av93.c11.g808.i1	6270335	6284003	antisense	1
c11	Hcv1.av93.c11.g810.i1	6281005	6282638	Hcv1.av93.c11.g808.i1	6270335	6284003	antisense	3
c11	Hcv1.av93.c11.g817.i1	6324773	6325213	Hcv1.av93.c11.g816.i1	6322754	6340535	antisense	2
c11	Hcv1.av93.c11.g818.i1	6326975	6331988	Hcv1.av93.c11.g816.i1	6322754	6340535	sense	11
c11	Hcv1.av93.c11.g826.i1	6396710	6398548	Hcv1.av93.c11.g825.i1	6396706	6398643	sense	1
c11	Hcv1.av93.c11.g831.i1	6432415	6433675	Hcv1.av93.c11.g830.i1	6430755	6433788	antisense	4
c11	Hcv1.av93.c11.g833.i1	6434406	6434907	Hcv1.av93.c11.g832.i1	6434344	6435527	antisense	1
c11	Hcv1.av93.c11.g835.i1	6438111	6439478	Hcv1.av93.c11.g834.i1	6437552	6440250	sense	1
c11	Hcv1.av93.c11.g836.i1	6441896	6443663	Hcv1.av93.c11.g834.i1	6441597	6444422	sense	1
c11	Hcv1.av93.c11.g856.i1	6539554	6545771	Hcv1.av93.c11.g855.i1	6534797	6545732	antisense	5
c11	Hcv1.av93.c11.g864.i1	6602526	6603262	Hcv1.av93.c11.g863.i1	6598314	6605711	antisense	1
c11	Hcv1.av93.c11.g867.i1	6630547	6637949	Hcv1.av93.c11.g866.i2	6630159	6638933	antisense	8
c11	Hcv1.av93.c11.g867.i1	6630547	6637949	Hcv1.av93.c11.g866.i3	6630159	6638933	antisense	8
c11	Hcv1.av93.c11.g867.i1	6630547	6637949	Hcv1.av93.c11.g866.i4	6630159	6638933	antisense	8
c11	Hcv1.av93.c11.g867.i1	6630547	6637949	Hcv1.av93.c11.g866.i5	6630159	6638933	antisense	8
c11	Hcv1.av93.c11.g867.i1	6630547	6637949	Hcv1.av93.c11.g866.i6	6630159	6638933	antisense	8
c11	Hcv1.av93.c11.g867.i1	6630547	6637949	Hcv1.av93.c11.g866.i7	6630159	6638933	antisense	8
c11	Hcv1.av93.c11.g868.i1	6630800	6631978	Hcv1.av93.c11.g866.i2	6630159	6638933	sense	1
c11	Hcv1.av93.c11.g868.i1	6630800	6631978	Hcv1.av93.c11.g866.i3	6630159	6638933	sense	1
c11	Hcv1.av93.c11.g868.i1	6630800	6631978	Hcv1.av93.c11.g866.i4	6630159	6638933	sense	1
c11	Hcv1.av93.c11.g868.i1	6630800	6631978	Hcv1.av93.c11.g866.i5	6630159	6638933	sense	1
c11	Hcv1.av93.c11.g868.i1	6630800	6631978	Hcv1.av93.c11.g866.i6	6630159	6638933	sense	1
c11	Hcv1.av93.c11.g868.i1	6630800	6631978	Hcv1.av93.c11.g866.i7	6630159	6638933	sense	1
c11	Hcv1.av93.c11.g868.i1	6630800	6631978	Hcv1.av93.c11.g867.i1	6630768	6632396	antisense	1
c11	Hcv1.av93.c11.g873.i1	6664536	6665921	Hcv1.av93.c11.g872.i1	6664464	6667547	antisense	1
c11	Hcv1.av93.c11.g873.i1	6664536	6665921	Hcv1.av93.c11.g872.i2	6664464	6667547	antisense	1
c11	Hcv1.av93.c11.g874.i1	6666641	6667329	Hcv1.av93.c11.g872.i1	6664464	6667547	antisense	1
c11	Hcv1.av93.c11.g874.i1	6666641	6667329	Hcv1.av93.c11.g872.i2	6664464	6667547	antisense	1
c11	Hcv1.av93.c11.g882.i1	6717719	6721325	Hcv1.av93.c11.g881.i1	6717493	6722148	antisense	3
c11	Hcv1.av93.c11.g882.i1	6717719	6721325	Hcv1.av93.c11.g881.i2	6717493	6722148	antisense	3
c11	Hcv1.av93.c11.g884.i1	6737428	6737783	Hcv1.av93.c11.g883.i1	6735315	6743307	antisense	2
c11	Hcv1.av93.c11.g884.i1	6737428	6737783	Hcv1.av93.c11.g883.i2	6735315	6743307	antisense	2
c11	Hcv1.av93.c11.g884.i1	6737428	6737783	Hcv1.av93.c11.g883.i3	6735315	6743307	antisense	2
c11	Hcv1.av93.c11.g888.i1	6760295	6761329	Hcv1.av93.c11.g887.i1	6758445	6761549	antisense	1
c11	Hcv1.av93.c11.g897.i1	6812659	6813959	Hcv1.av93.c11.g896.i1	6810343	6814236	antisense	1
c11	Hcv1.av93.c11.g899.i1	6817948	6821487	Hcv1.av93.c11.g898.i1	6817793	6821617	antisense	5
c11	Hcv1.av93.c11.g904.i1	6856693	6858181	Hcv1.av93.c11.g903.i1	6856157	6866283	sense	2
c11	Hcv1.av93.c11.g905.i1	6858730	6859655	Hcv1.av93.c11.g903.i1	6856157	6866283	sense	1
c11	Hcv1.av93.c11.g906.i1	6859722	6860554	Hcv1.av93.c11.g903.i1	6856157	6866283	sense	1
c11	Hcv1.av93.c11.g909.i1	6868731	6870419	Hcv1.av93.c11.g908.i1	6867585	6873051	sense	3
c11	Hcv1.av93.c11.g915.i1	6899778	6903387	Hcv1.av93.c11.g914.i1	6897208	6907449	antisense	6
c11	Hcv1.av93.c11.g916.i1	6908484	6913591	Hcv1.av93.c11.g914.i1	6908337	6912966	antisense	9
c11	Hcv1.av93.c11.g925.i1	6991374	6992876	Hcv1.av93.c11.g924.i1	6985231	6993408	antisense	4
c11	Hcv1.av93.c11.g926.i1	7007750	7009166	Hcv1.av93.c11.g924.i1	7004509	7009368	antisense	1
c11	Hcv1.av93.c11.g927.i1	7012816	7013223	Hcv1.av93.c11.g924.i1	7010876	7013495	antisense	1
c11	Hcv1.av93.c11.g931.i1	7056311	7057849	Hcv1.av93.c11.g930.i1	7056084	7058123	sense	1
c11	Hcv1.av93.c11.g954.i1	7220967	7222385	Hcv1.av93.c11.g953.i1	7220765	7222902	sense	2
c11	Hcv1.av93.c11.g954.i1	7220967	7222385	Hcv1.av93.c11.g953.i2	7220765	7222902	sense	2
c11	Hcv1.av93.c11.g954.i1	7220967	7222385	Hcv1.av93.c11.g953.i3	7220765	7222902	sense	2
c11	Hcv1.av93.c11.g97.i1	686287	687312	Hcv1.av93.c11.g96.i1	683647	687792	antisense	3
c11	Hcv1.av93.c11.g976.i1	7393638	7395358	Hcv1.av93.c11.g974.i1	7391356	7397830	antisense	1
c11	Hcv1.av93.c11.g976.i1	7393638	7395358	Hcv1.av93.c11.g975.i1	7393436	7397638	sense	1
c11	Hcv1.av93.c11.g977.i1	7409179	7409944	Hcv1.av93.c11.g975.i1	7408492	7410186	antisense	1
c11	Hcv1.av93.c11.g98.i1	696898	700163	Hcv1.av93.c11.g96.i1	696490	700253	antisense	1
c11	Hcv1.av93.c11.g99.i1	702870	705168	Hcv1.av93.c11.g96.i1	701454	705539	antisense	3
c11	Hcv1.av93.c11.g991.i1	7485630	7485905	Hcv1.av93.c11.g990.i1	7485069	7486838	sense	1
c12	Hcv1.av93.c12.g105.i1	1096765	1097795	Hcv1.av93.c12.g104.i1	1096488	1098151	antisense	1
c12	Hcv1.av93.c12.g105.i1	1096765	1097795	Hcv1.av93.c12.g104.i2	1096488	1098151	antisense	1
c12	Hcv1.av93.c12.g108.i1	1145293	1145788	Hcv1.av93.c12.g107.i1	1144677	1146553	antisense	1
c12	Hcv1.av93.c12.g112.i1	1196647	1198994	Hcv1.av93.c12.g111.i3	1194652	1207824	sense	2
c12	Hcv1.av93.c12.g113.i1	1213295	1213853	Hcv1.av93.c12.g111.i1	1212789	1220907	antisense	2
c12	Hcv1.av93.c12.g113.i1	1213295	1213853	Hcv1.av93.c12.g111.i3	1212789	1220907	antisense	2
c12	Hcv1.av93.c12.g113.i1	1213295	1213853	Hcv1.av93.c12.g111.i4	1212789	1220907	antisense	2
c12	Hcv1.av93.c12.g113.i1	1213295	1213853	Hcv1.av93.c12.g111.i5	1212789	1220907	antisense	2
c12	Hcv1.av93.c12.g113.i1	1213295	1213853	Hcv1.av93.c12.g111.i6	1212789	1220907	antisense	2
c12	Hcv1.av93.c12.g117.i1	1251705	1253014	Hcv1.av93.c12.g116.i1	1248069	1254390	antisense	1
c12	Hcv1.av93.c12.g126.i1	1297994	1299151	Hcv1.av93.c12.g125.i1	1297863	1305922	antisense	4
c12	Hcv1.av93.c12.g130.i1	1354675	1357817	Hcv1.av93.c12.g129.i1	1353862	1358050	antisense	4
c12	Hcv1.av93.c12.g130.i1	1354675	1357817	Hcv1.av93.c12.g129.i2	1353862	1358050	antisense	4
c12	Hcv1.av93.c12.g133.i1	1379643	1385060	Hcv1.av93.c12.g132.i1	1378531	1385687	antisense	18
c12	Hcv1.av93.c12.g137.i1	1439655	1445202	Hcv1.av93.c12.g136.i1	1438519	1457240	sense	2
c12	Hcv1.av93.c12.g138.i1	1477102	1478388	Hcv1.av93.c12.g136.i1	1475714	1478630	antisense	1
c12	Hcv1.av93.c12.g139.i1	1486396	1491233	Hcv1.av93.c12.g136.i1	1484465	1491464	antisense	6
c12	Hcv1.av93.c12.g148.i1	1579555	1581419	Hcv1.av93.c12.g147.i1	1573927	1584085	antisense	1
c12	Hcv1.av93.c12.g148.i1	1579555	1581419	Hcv1.av93.c12.g147.i2	1573927	1584085	antisense	1
c12	Hcv1.av93.c12.g151.i1	1610500	1610859	Hcv1.av93.c12.g150.i1	1608375	1611181	sense	1
c12	Hcv1.av93.c12.g151.i1	1610500	1610859	Hcv1.av93.c12.g150.i2	1608375	1611181	sense	1
c12	Hcv1.av93.c12.g163.i4	1711354	1712602	Hcv1.av93.c12.g163.i3	1710932	1712714	sense	1
c12	Hcv1.av93.c12.g166.i1	1738231	1739687	Hcv1.av93.c12.g165.i1	1733901	1740196	antisense	1
c12	Hcv1.av93.c12.g166.i1	1738231	1739687	Hcv1.av93.c12.g165.i2	1733901	1740196	antisense	1
c12	Hcv1.av93.c12.g168.i1	1753528	1754851	Hcv1.av93.c12.g167.i1	1750893	1755549	sense	1
c12	Hcv1.av93.c12.g168.i1	1753528	1754851	Hcv1.av93.c12.g167.i2	1752472	1755549	sense	1
c12	Hcv1.av93.c12.g17.i1	188046	189553	Hcv1.av93.c12.g12.i1	187654	189760	sense	1
c12	Hcv1.av93.c12.g173.i1	1779352	1780997	Hcv1.av93.c12.g172.i1	1779268	1782364	antisense	2
c12	Hcv1.av93.c12.g174.i1	1783778	1790488	Hcv1.av93.c12.g172.i1	1783002	1792941	sense	8
c12	Hcv1.av93.c12.g181.i1	1852355	1854692	Hcv1.av93.c12.g180.i1	1852116	1855822	sense	1
c12	Hcv1.av93.c12.g181.i1	1852355	1854692	Hcv1.av93.c12.g180.i2	1852116	1855822	sense	1
c12	Hcv1.av93.c12.g185.i1	1872858	1875836	Hcv1.av93.c12.g184.i1	1872519	1880612	antisense	10
c12	Hcv1.av93.c12.g185.i1	1872858	1875836	Hcv1.av93.c12.g184.i2	1872519	1880612	antisense	10
c12	Hcv1.av93.c12.g185.i2	1872858	1875836	Hcv1.av93.c12.g184.i1	1872519	1880612	antisense	8
c12	Hcv1.av93.c12.g185.i2	1872858	1875836	Hcv1.av93.c12.g184.i2	1872519	1880612	antisense	8
c12	Hcv1.av93.c12.g186.i1	1887913	1891055	Hcv1.av93.c12.g184.i1	1887453	1892136	antisense	8
c12	Hcv1.av93.c12.g186.i1	1887913	1891055	Hcv1.av93.c12.g184.i2	1887453	1892136	antisense	8
c12	Hcv1.av93.c12.g194.i1	1965503	1967313	Hcv1.av93.c12.g193.i1	1961036	1968511	sense	2
c12	Hcv1.av93.c12.g194.i1	1965503	1967313	Hcv1.av93.c12.g193.i2	1961036	1968511	sense	2
c12	Hcv1.av93.c12.g194.i1	1965503	1967313	Hcv1.av93.c12.g193.i3	1961036	1968511	sense	2
c12	Hcv1.av93.c12.g196.i1	1980228	1982104	Hcv1.av93.c12.g195.i1	1980136	1983096	sense	1
c12	Hcv1.av93.c12.g196.i1	1980228	1982104	Hcv1.av93.c12.g195.i2	1980136	1983096	sense	1
c12	Hcv1.av93.c12.g2.i1	33533	36905	Hcv1.av93.c12.g1.i1	20449	37140	sense	6
c12	Hcv1.av93.c12.g209.i1	2053340	2054288	Hcv1.av93.c12.g208.i1	2050764	2055061	antisense	1
c12	Hcv1.av93.c12.g209.i1	2053340	2054288	Hcv1.av93.c12.g208.i2	2050764	2055061	antisense	1
c12	Hcv1.av93.c12.g209.i1	2053340	2054288	Hcv1.av93.c12.g208.i3	2050764	2055061	antisense	1
c12	Hcv1.av93.c12.g217.i1	2114527	2114973	Hcv1.av93.c12.g216.i1	2114485	2116126	sense	1
c12	Hcv1.av93.c12.g217.i1	2114527	2114973	Hcv1.av93.c12.g216.i2	2114485	2116126	sense	1
c12	Hcv1.av93.c12.g217.i1	2114527	2114973	Hcv1.av93.c12.g216.i3	2114485	2116126	sense	1
c12	Hcv1.av93.c12.g217.i1	2114527	2114973	Hcv1.av93.c12.g216.i4	2114485	2116126	sense	1
c12	Hcv1.av93.c12.g217.i1	2114527	2114973	Hcv1.av93.c12.g216.i5	2114485	2116126	sense	1
c12	Hcv1.av93.c12.g219.i1	2149197	2151381	Hcv1.av93.c12.g218.i1	2145960	2151442	antisense	1
c12	Hcv1.av93.c12.g220.i1	2163059	2168414	Hcv1.av93.c12.g218.i1	2159325	2169180	antisense	6
c12	Hcv1.av93.c12.g221.i1	2164506	2165972	Hcv1.av93.c12.g218.i1	2159325	2169180	antisense	1
c12	Hcv1.av93.c12.g221.i1	2164506	2165972	Hcv1.av93.c12.g220.i1	2163586	2166987	sense	1
c12	Hcv1.av93.c12.g222.i1	2176998	2177756	Hcv1.av93.c12.g218.i1	2174839	2178044	antisense	1
c12	Hcv1.av93.c12.g229.i1	2219068	2224233	Hcv1.av93.c12.g228.i1	2218482	2238039	sense	8
c12	Hcv1.av93.c12.g23.i1	241183	242548	Hcv1.av93.c12.g20.i1	240845	243052	sense	1
c12	Hcv1.av93.c12.g23.i1	241183	242548	Hcv1.av93.c12.g20.i2	240845	243052	sense	1
c12	Hcv1.av93.c12.g23.i1	241183	242548	Hcv1.av93.c12.g20.i3	240845	243052	sense	1
c12	Hcv1.av93.c12.g230.i1	2224312	2224955	Hcv1.av93.c12.g228.i1	2218482	2238039	sense	1
c12	Hcv1.av93.c12.g232.i1	2232463	2238031	Hcv1.av93.c12.g228.i1	2218482	2238039	sense	1
c12	Hcv1.av93.c12.g232.i1	2232463	2238031	Hcv1.av93.c12.g231.i1	2231608	2245541	antisense	1
c12	Hcv1.av93.c12.g232.i1	2232463	2238031	Hcv1.av93.c12.g231.i2	2231608	2245541	antisense	1
c12	Hcv1.av93.c12.g232.i1	2232463	2238031	Hcv1.av93.c12.g231.i3	2231690	2245106	antisense	1
c12	Hcv1.av93.c12.g232.i1	2232463	2238031	Hcv1.av93.c12.g231.i4	2231608	2245541	antisense	1
c12	Hcv1.av93.c12.g236.i1	2266985	2268659	Hcv1.av93.c12.g235.i1	2266919	2276717	antisense	3
c12	Hcv1.av93.c12.g24.i1	244517	246062	Hcv1.av93.c12.g20.i1	244253	252391	sense	1
c12	Hcv1.av93.c12.g24.i1	244517	246062	Hcv1.av93.c12.g20.i2	244253	252391	sense	1
c12	Hcv1.av93.c12.g24.i1	244517	246062	Hcv1.av93.c12.g20.i3	244253	252391	sense	1
c12	Hcv1.av93.c12.g252.i1	2453308	2455491	Hcv1.av93.c12.g246.i3	2447538	2461138	antisense	7
c12	Hcv1.av93.c12.g253.i1	2455795	2461721	Hcv1.av93.c12.g246.i3	2447538	2461138	antisense	7
c12	Hcv1.av93.c12.g253.i2	2456048	2461721	Hcv1.av93.c12.g246.i3	2447538	2461138	antisense	6
c12	Hcv1.av93.c12.g258.i1	2499209	2501649	Hcv1.av93.c12.g257.i1	2497791	2502642	antisense	1
c12	Hcv1.av93.c12.g27.i1	292867	296654	Hcv1.av93.c12.g26.i1	289802	298060	sense	3
c12	Hcv1.av93.c12.g271.i1	2648800	2651513	Hcv1.av93.c12.g270.i1	2645659	2651927	sense	2
c12	Hcv1.av93.c12.g280.i1	2762943	2765924	Hcv1.av93.c12.g279.i1	2762484	2765723	antisense	2
c12	Hcv1.av93.c12.g280.i1	2762943	2765924	Hcv1.av93.c12.g279.i2	2762484	2765723	antisense	2
c12	Hcv1.av93.c12.g281.i1	2786239	2788060	Hcv1.av93.c12.g279.i1	2775190	2792385	antisense	6
c12	Hcv1.av93.c12.g281.i1	2786239	2788060	Hcv1.av93.c12.g279.i2	2775190	2792385	antisense	6
c12	Hcv1.av93.c12.g282.i1	2789567	2792360	Hcv1.av93.c12.g279.i1	2775190	2792385	antisense	8
c12	Hcv1.av93.c12.g282.i1	2789567	2792360	Hcv1.av93.c12.g279.i2	2775190	2792385	antisense	8
c12	Hcv1.av93.c12.g283.i1	2798022	2812344	Hcv1.av93.c12.g279.i1	2794683	2814716	antisense	25
c12	Hcv1.av93.c12.g283.i1	2798022	2812344	Hcv1.av93.c12.g279.i2	2794683	2814716	antisense	25
c12	Hcv1.av93.c12.g283.i2	2798022	2812344	Hcv1.av93.c12.g279.i1	2794683	2814716	antisense	25
c12	Hcv1.av93.c12.g283.i2	2798022	2812344	Hcv1.av93.c12.g279.i2	2794683	2814716	antisense	25
c12	Hcv1.av93.c12.g284.i1	2816450	2817769	Hcv1.av93.c12.g279.i1	2814834	2819869	antisense	1
c12	Hcv1.av93.c12.g284.i1	2816450	2817769	Hcv1.av93.c12.g279.i2	2814834	2819869	antisense	1
c12	Hcv1.av93.c12.g286.i1	2840259	2847136	Hcv1.av93.c12.g285.i1	2838283	2852830	sense	7
c12	Hcv1.av93.c12.g287.i1	2847831	2848873	Hcv1.av93.c12.g285.i1	2838283	2852830	sense	1
c12	Hcv1.av93.c12.g289.i1	2885409	2889531	Hcv1.av93.c12.g288.i2	2885038	2894735	antisense	5
c12	Hcv1.av93.c12.g290.i1	2891160	2894388	Hcv1.av93.c12.g288.i2	2885038	2894735	sense	6
c12	Hcv1.av93.c12.g3.i1	38881	43361	Hcv1.av93.c12.g1.i1	37268	52508	sense	3
c12	Hcv1.av93.c12.g30.i1	332546	336706	Hcv1.av93.c12.g29.i1	328893	336935	antisense	2
c12	Hcv1.av93.c12.g30.i1	332546	336706	Hcv1.av93.c12.g29.i2	328893	336935	antisense	2
c12	Hcv1.av93.c12.g301.i1	2983043	2984874	Hcv1.av93.c12.g300.i1	2981903	2985605	antisense	6
c12	Hcv1.av93.c12.g303.i1	2993565	2995813	Hcv1.av93.c12.g302.i1	2991077	2998879	antisense	1
c12	Hcv1.av93.c12.g31.i1	333528	335079	Hcv1.av93.c12.g29.i1	328893	336935	sense	1
c12	Hcv1.av93.c12.g31.i1	333528	335079	Hcv1.av93.c12.g29.i2	328893	336935	sense	1
c12	Hcv1.av93.c12.g31.i1	333528	335079	Hcv1.av93.c12.g30.i1	333517	336178	antisense	1
c12	Hcv1.av93.c12.g316.i1	3211042	3214825	Hcv1.av93.c12.g315.i1	3211013	3225888	sense	2
c12	Hcv1.av93.c12.g32.i1	345184	346672	Hcv1.av93.c12.g29.i1	343993	351715	antisense	1
c12	Hcv1.av93.c12.g32.i1	345184	346672	Hcv1.av93.c12.g29.i2	343993	351715	antisense	1
c12	Hcv1.av93.c12.g320.i1	3248807	3249602	Hcv1.av93.c12.g319.i1	3243176	3250660	antisense	2
c12	Hcv1.av93.c12.g320.i1	3248807	3249602	Hcv1.av93.c12.g319.i2	3243176	3250660	antisense	2
c12	Hcv1.av93.c12.g332.i1	3404484	3406218	Hcv1.av93.c12.g331.i1	3402975	3407232	sense	1
c12	Hcv1.av93.c12.g334.i1	3420954	3422594	Hcv1.av93.c12.g333.i1	3420915	3422616	antisense	3
c12	Hcv1.av93.c12.g346.i1	3526548	3527738	Hcv1.av93.c12.g345.i1	3526247	3528325	sense	1
c12	Hcv1.av93.c12.g346.i1	3526548	3527738	Hcv1.av93.c12.g345.i2	3526247	3528325	sense	1
c12	Hcv1.av93.c12.g346.i1	3526548	3527738	Hcv1.av93.c12.g345.i3	3526247	3528325	sense	1
c12	Hcv1.av93.c12.g359.i1	3762938	3764588	Hcv1.av93.c12.g358.i1	3751530	3769894	sense	3
c12	Hcv1.av93.c12.g359.i2	3762938	3764588	Hcv1.av93.c12.g358.i1	3751530	3769894	sense	3
c12	Hcv1.av93.c12.g384.i1	4131094	4131733	Hcv1.av93.c12.g383.i1	4130243	4133474	antisense	1
c12	Hcv1.av93.c12.g384.i1	4131094	4131733	Hcv1.av93.c12.g383.i3	4130243	4133474	antisense	1
c12	Hcv1.av93.c12.g396.i1	4343187	4347569	Hcv1.av93.c12.g395.i1	4335247	4347686	antisense	3
c12	Hcv1.av93.c12.g4.i1	43561	48146	Hcv1.av93.c12.g1.i1	37268	52508	sense	1
c12	Hcv1.av93.c12.g402.i1	4401831	4403253	Hcv1.av93.c12.g401.i1	4401191	4417069	sense	2
c12	Hcv1.av93.c12.g403.i1	4405552	4407331	Hcv1.av93.c12.g401.i1	4401191	4417069	sense	2
c12	Hcv1.av93.c12.g405.i1	4437085	4437251	Hcv1.av93.c12.g404.i1	4436731	4438889	antisense	1
c12	Hcv1.av93.c12.g405.i1	4437085	4437251	Hcv1.av93.c12.g404.i2	4436731	4438889	antisense	1
c12	Hcv1.av93.c12.g406.i1	4437535	4437950	Hcv1.av93.c12.g404.i1	4436731	4438889	antisense	1
c12	Hcv1.av93.c12.g406.i1	4437535	4437950	Hcv1.av93.c12.g404.i2	4436731	4438889	antisense	1
c12	Hcv1.av93.c12.g410.i1	4457275	4459182	Hcv1.av93.c12.g409.i1	4447837	4465616	sense	2
c12	Hcv1.av93.c12.g410.i1	4457275	4459182	Hcv1.av93.c12.g409.i2	4447837	4465616	sense	2
c12	Hcv1.av93.c12.g412.i1	4491069	4494716	Hcv1.av93.c12.g411.i1	4483430	4500397	sense	2
c12	Hcv1.av93.c12.g412.i1	4491069	4494716	Hcv1.av93.c12.g411.i2	4483430	4500397	sense	2
c12	Hcv1.av93.c12.g42.i1	451718	452472	Hcv1.av93.c12.g41.i1	450437	454210	sense	1
c12	Hcv1.av93.c12.g429.i1	4678466	4681012	Hcv1.av93.c12.g428.i1	4678229	4684639	sense	2
c12	Hcv1.av93.c12.g429.i1	4678466	4681012	Hcv1.av93.c12.g428.i2	4678229	4684639	sense	2
c12	Hcv1.av93.c12.g43.i1	458602	462426	Hcv1.av93.c12.g41.i1	457620	465920	antisense	2
c12	Hcv1.av93.c12.g430.i1	4689033	4689557	Hcv1.av93.c12.g428.i1	4684784	4691052	sense	1
c12	Hcv1.av93.c12.g430.i1	4689033	4689557	Hcv1.av93.c12.g428.i2	4684784	4691052	sense	1
c12	Hcv1.av93.c12.g440.i1	4760304	4761020	Hcv1.av93.c12.g439.i1	4758543	4762433	antisense	1
c12	Hcv1.av93.c12.g440.i1	4760304	4761020	Hcv1.av93.c12.g439.i2	4758543	4762433	antisense	1
c12	Hcv1.av93.c12.g448.i1	4848982	4853429	Hcv1.av93.c12.g447.i1	4846586	4854184	antisense	6
c12	Hcv1.av93.c12.g448.i2	4847618	4853431	Hcv1.av93.c12.g447.i1	4846586	4854184	antisense	7
c12	Hcv1.av93.c12.g455.i1	4907666	4908956	Hcv1.av93.c12.g454.i1	4907214	4912681	sense	1
c12	Hcv1.av93.c12.g455.i1	4907666	4908956	Hcv1.av93.c12.g454.i2	4907214	4912681	sense	1
c12	Hcv1.av93.c12.g459.i2	4982453	4983609	Hcv1.av93.c12.g458.i1	4982218	4983508	antisense	2
c12	Hcv1.av93.c12.g459.i2	4982453	4983609	Hcv1.av93.c12.g458.i2	4982218	4983508	antisense	2
c12	Hcv1.av93.c12.g459.i2	4982453	4983609	Hcv1.av93.c12.g458.i3	4982218	4983508	antisense	2
c12	Hcv1.av93.c12.g459.i2	4982453	4983609	Hcv1.av93.c12.g458.i4	4982218	4983508	antisense	2
c12	Hcv1.av93.c12.g460.i1	4989180	4990640	Hcv1.av93.c12.g458.i1	4984606	5000998	sense	1
c12	Hcv1.av93.c12.g460.i1	4989180	4990640	Hcv1.av93.c12.g458.i2	4984899	5001015	sense	1
c12	Hcv1.av93.c12.g460.i1	4989180	4990640	Hcv1.av93.c12.g458.i3	4986240	5000683	sense	1
c12	Hcv1.av93.c12.g460.i1	4989180	4990640	Hcv1.av93.c12.g458.i4	4984817	5000790	sense	1
c12	Hcv1.av93.c12.g461.i1	4991156	4994227	Hcv1.av93.c12.g458.i1	4984606	5000998	sense	1
c12	Hcv1.av93.c12.g461.i1	4991156	4994227	Hcv1.av93.c12.g458.i2	4984899	5001015	sense	1
c12	Hcv1.av93.c12.g461.i1	4991156	4994227	Hcv1.av93.c12.g458.i3	4986240	5000683	sense	1
c12	Hcv1.av93.c12.g461.i1	4991156	4994227	Hcv1.av93.c12.g458.i4	4984817	5000790	sense	1
c12	Hcv1.av93.c12.g465.i1	5051198	5055473	Hcv1.av93.c12.g464.i1	5050410	5057192	antisense	2
c12	Hcv1.av93.c12.g468.i1	5156050	5163227	Hcv1.av93.c12.g467.i1	5152442	5167908	sense	2
c12	Hcv1.av93.c12.g469.i1	5157274	5163520	Hcv1.av93.c12.g467.i1	5152442	5167908	antisense	7
c12	Hcv1.av93.c12.g471.i1	5172404	5174764	Hcv1.av93.c12.g470.i1	5160063	5179146	antisense	2
c12	Hcv1.av93.c12.g471.i1	5172404	5174764	Hcv1.av93.c12.g470.i2	5160063	5179146	antisense	2
c12	Hcv1.av93.c12.g472.i1	5177254	5178852	Hcv1.av93.c12.g470.i1	5160063	5179146	antisense	2
c12	Hcv1.av93.c12.g472.i1	5177254	5178852	Hcv1.av93.c12.g470.i2	5160063	5179146	antisense	2
c12	Hcv1.av93.c12.g473.i1	5183894	5184815	Hcv1.av93.c12.g470.i1	5183901	5185092	antisense	1
c12	Hcv1.av93.c12.g473.i1	5183894	5184815	Hcv1.av93.c12.g470.i2	5183901	5185092	antisense	1
c12	Hcv1.av93.c12.g499.i1	5368228	5370617	Hcv1.av93.c12.g498.i1	5368067	5372855	antisense	6
c12	Hcv1.av93.c12.g499.i1	5368228	5370617	Hcv1.av93.c12.g498.i2	5368067	5372855	antisense	6
c12	Hcv1.av93.c12.g50.i1	499733	501331	Hcv1.av93.c12.g49.i1	498769	501485	antisense	5
c12	Hcv1.av93.c12.g507.i1	5451775	5452023	Hcv1.av93.c12.g506.i1	5451683	5460048	antisense	1
c12	Hcv1.av93.c12.g510.i1	5543367	5544909	Hcv1.av93.c12.g509.i1	5542785	5545669	antisense	1
c12	Hcv1.av93.c12.g523.i1	5772261	5774659	Hcv1.av93.c12.g522.i1	5764504	5774687	antisense	1
c12	Hcv1.av93.c12.g523.i1	5772261	5774659	Hcv1.av93.c12.g522.i2	5764504	5774687	antisense	1
c12	Hcv1.av93.c12.g53.i1	546587	547892	Hcv1.av93.c12.g52.i1	543166	548041	antisense	4
c12	Hcv1.av93.c12.g538.i1	6115796	6117942	Hcv1.av93.c12.g537.i5	6114090	6124015	sense	3
c12	Hcv1.av93.c12.g541.i1	6133823	6142655	Hcv1.av93.c12.g540.i1	6133557	6144624	antisense	16
c12	Hcv1.av93.c12.g541.i1	6133823	6142655	Hcv1.av93.c12.g540.i2	6133557	6144624	antisense	16
c12	Hcv1.av93.c12.g541.i1	6133823	6142655	Hcv1.av93.c12.g540.i3	6133557	6144624	antisense	16
c12	Hcv1.av93.c12.g541.i2	6138171	6142655	Hcv1.av93.c12.g540.i1	6133557	6144624	antisense	9
c12	Hcv1.av93.c12.g541.i2	6138171	6142655	Hcv1.av93.c12.g540.i2	6133557	6144624	antisense	9
c12	Hcv1.av93.c12.g541.i2	6138171	6142655	Hcv1.av93.c12.g540.i3	6133557	6144624	antisense	9
c12	Hcv1.av93.c12.g548.i1	6298374	6303031	Hcv1.av93.c12.g547.i1	6290194	6310560	sense	7
c12	Hcv1.av93.c12.g548.i1	6298374	6303031	Hcv1.av93.c12.g547.i2	6290194	6310560	sense	7
c12	Hcv1.av93.c12.g548.i1	6298374	6303031	Hcv1.av93.c12.g547.i3	6290194	6310560	sense	7
c12	Hcv1.av93.c12.g548.i1	6298374	6303031	Hcv1.av93.c12.g547.i4	6290194	6310560	sense	7
c12	Hcv1.av93.c12.g554.i1	6368656	6369222	Hcv1.av93.c12.g553.i1	6367561	6369854	sense	2
c12	Hcv1.av93.c12.g557.i1	6408187	6416130	Hcv1.av93.c12.g556.i1	6406816	6420807	antisense	17
c12	Hcv1.av93.c12.g557.i1	6408187	6416130	Hcv1.av93.c12.g556.i2	6406816	6420807	antisense	17
c12	Hcv1.av93.c12.g557.i1	6408187	6416130	Hcv1.av93.c12.g556.i3	6406816	6420807	antisense	17
c12	Hcv1.av93.c12.g56.i1	595849	596927	Hcv1.av93.c12.g55.i1	592595	598794	antisense	3
c12	Hcv1.av93.c12.g56.i1	595849	596927	Hcv1.av93.c12.g55.i2	592595	598794	antisense	3
c12	Hcv1.av93.c12.g561.i1	6548318	6550025	Hcv1.av93.c12.g560.i1	6548255	6550174	sense	2
c12	Hcv1.av93.c12.g567.i1	6640809	6643031	Hcv1.av93.c12.g566.i1	6630916	6643703	sense	1
c12	Hcv1.av93.c12.g568.i1	6651940	6654375	Hcv1.av93.c12.g566.i1	6650727	6662625	sense	6
c12	Hcv1.av93.c12.g58.i1	609861	615348	Hcv1.av93.c12.g57.i1	608606	615865	antisense	4
c12	Hcv1.av93.c12.g60.i1	628019	637161	Hcv1.av93.c12.g59.i1	627065	638051	antisense	22
c12	Hcv1.av93.c12.g68.i1	697190	698418	Hcv1.av93.c12.g67.i1	696604	698584	sense	1
c12	Hcv1.av93.c12.g74.i1	818784	821791	Hcv1.av93.c12.g73.i1	818379	824661	antisense	5
c12	Hcv1.av93.c12.g74.i1	818784	821791	Hcv1.av93.c12.g73.i2	818379	824661	antisense	5
c12	Hcv1.av93.c12.g75.i1	826320	832123	Hcv1.av93.c12.g73.i1	826200	836887	antisense	14
c12	Hcv1.av93.c12.g75.i1	826320	832123	Hcv1.av93.c12.g73.i2	826200	836887	antisense	14
c12	Hcv1.av93.c12.g75.i2	826320	832123	Hcv1.av93.c12.g73.i1	826200	836887	antisense	14
c12	Hcv1.av93.c12.g75.i2	826320	832123	Hcv1.av93.c12.g73.i2	826200	836887	antisense	14
c12	Hcv1.av93.c12.g77.i1	862982	863724	Hcv1.av93.c12.g76.i1	858328	870977	sense	1
c12	Hcv1.av93.c12.g78.i1	865004	865873	Hcv1.av93.c12.g76.i1	858328	870977	sense	1
c12	Hcv1.av93.c12.g79.i1	867722	869485	Hcv1.av93.c12.g76.i1	858328	870977	antisense	6
c12	Hcv1.av93.c12.g80.i1	903441	905686	Hcv1.av93.c12.g76.i1	903302	907546	antisense	5
c12	Hcv1.av93.c12.g81.i1	912134	915114	Hcv1.av93.c12.g76.i1	911822	915275	sense	3
c12	Hcv1.av93.c12.g89.i1	993766	994160	Hcv1.av93.c12.g88.i1	990093	997052	antisense	2
c12	Hcv1.av93.c12.g89.i1	993766	994160	Hcv1.av93.c12.g88.i2	990093	997147	antisense	2
c12	Hcv1.av93.c12.g94.i1	1037971	1038707	Hcv1.av93.c12.g93.i1	1037761	1040157	sense	1
c12	Hcv1.av93.c12.g96.i1	1043998	1044336	Hcv1.av93.c12.g95.i1	1043743	1045007	antisense	1
c12	Hcv1.av93.c12.g96.i1	1043998	1044336	Hcv1.av93.c12.g95.i2	1043743	1045007	antisense	1
c13	Hcv1.av93.c13.g113.i1	1002818	1009391	Hcv1.av93.c13.g112.i1	1002681	1011560	sense	5
c13	Hcv1.av93.c13.g114.i1	1005596	1006295	Hcv1.av93.c13.g112.i1	1002681	1011560	sense	1
c13	Hcv1.av93.c13.g114.i1	1005596	1006295	Hcv1.av93.c13.g113.i1	1003266	1008746	sense	1
c13	Hcv1.av93.c13.g126.i1	1084120	1086734	Hcv1.av93.c13.g125.i1	1083954	1090191	sense	1
c13	Hcv1.av93.c13.g126.i1	1084120	1086734	Hcv1.av93.c13.g125.i2	1083954	1090191	sense	1
c13	Hcv1.av93.c13.g127.i1	1087562	1088072	Hcv1.av93.c13.g125.i1	1083954	1090191	sense	2
c13	Hcv1.av93.c13.g127.i1	1087562	1088072	Hcv1.av93.c13.g125.i2	1083954	1090191	sense	2
c13	Hcv1.av93.c13.g145.i1	1255107	1258526	Hcv1.av93.c13.g144.i1	1252345	1263100	antisense	2
c13	Hcv1.av93.c13.g145.i1	1255107	1258526	Hcv1.av93.c13.g144.i2	1252345	1263100	antisense	2
c13	Hcv1.av93.c13.g150.i1	1300263	1301195	Hcv1.av93.c13.g149.i1	1299189	1301250	sense	1
c13	Hcv1.av93.c13.g167.i1	1422446	1423892	Hcv1.av93.c13.g166.i1	1419981	1425227	antisense	4
c13	Hcv1.av93.c13.g175.i1	1464684	1465568	Hcv1.av93.c13.g174.i1	1464188	1466535	antisense	3
c13	Hcv1.av93.c13.g177.i1	1485481	1486662	Hcv1.av93.c13.g176.i1	1484720	1487270	antisense	2
c13	Hcv1.av93.c13.g177.i1	1485481	1486662	Hcv1.av93.c13.g176.i2	1484720	1487270	antisense	2
c13	Hcv1.av93.c13.g183.i1	1517173	1519310	Hcv1.av93.c13.g182.i1	1517112	1521336	antisense	2
c13	Hcv1.av93.c13.g184.i1	1523789	1524285	Hcv1.av93.c13.g182.i1	1522508	1524572	antisense	1
c13	Hcv1.av93.c13.g184.i1	1523789	1524285	Hcv1.av93.c13.g182.i2	1522508	1524572	antisense	1
c13	Hcv1.av93.c13.g186.i1	1536840	1542902	Hcv1.av93.c13.g185.i1	1535678	1542927	antisense	7
c13	Hcv1.av93.c13.g190.i1	1571677	1572754	Hcv1.av93.c13.g189.i1	1571156	1576903	sense	3
c13	Hcv1.av93.c13.g191.i1	1584556	1585095	Hcv1.av93.c13.g189.i1	1578582	1587705	sense	1
c13	Hcv1.av93.c13.g191.i1	1584556	1585095	Hcv1.av93.c13.g189.i2	1578582	1587705	sense	1
c13	Hcv1.av93.c13.g194.i1	1606363	1607553	Hcv1.av93.c13.g192.i1	1604543	1616777	sense	1
c13	Hcv1.av93.c13.g194.i1	1606363	1607553	Hcv1.av93.c13.g193.i1	1606131	1610745	antisense	1
c13	Hcv1.av93.c13.g197.i1	1638369	1639669	Hcv1.av93.c13.g196.i1	1636213	1640426	sense	2
c13	Hcv1.av93.c13.g199.i1	1667279	1677727	Hcv1.av93.c13.g198.i1	1663946	1680244	antisense	12
c13	Hcv1.av93.c13.g199.i2	1672838	1677727	Hcv1.av93.c13.g198.i1	1663946	1680244	antisense	11
c13	Hcv1.av93.c13.g200.i1	1686806	1687766	Hcv1.av93.c13.g198.i1	1685395	1697904	antisense	2
c13	Hcv1.av93.c13.g203.i1	1740479	1745374	Hcv1.av93.c13.g202.i1	1737537	1746027	antisense	1
c13	Hcv1.av93.c13.g21.i1	265505	267446	Hcv1.av93.c13.g18.i1	265746	268248	antisense	3
c13	Hcv1.av93.c13.g216.i1	1844737	1845435	Hcv1.av93.c13.g215.i1	1844694	1847366	sense	1
c13	Hcv1.av93.c13.g216.i1	1844737	1845435	Hcv1.av93.c13.g215.i2	1844694	1847366	sense	1
c13	Hcv1.av93.c13.g218.i1	1859874	1863380	Hcv1.av93.c13.g217.i1	1858808	1863633	antisense	11
c13	Hcv1.av93.c13.g219.i1	1870372	1874004	Hcv1.av93.c13.g217.i1	1869473	1875155	sense	1
c13	Hcv1.av93.c13.g221.i1	1891421	1892526	Hcv1.av93.c13.g220.i1	1887904	1893311	antisense	4
c13	Hcv1.av93.c13.g230.i1	1959060	1965209	Hcv1.av93.c13.g229.i1	1958825	1970794	antisense	15
c13	Hcv1.av93.c13.g230.i1	1959060	1965209	Hcv1.av93.c13.g229.i2	1958825	1965609	antisense	15
c13	Hcv1.av93.c13.g233.i1	1989223	1991392	Hcv1.av93.c13.g232.i1	1986337	1994982	antisense	3
c13	Hcv1.av93.c13.g233.i1	1989223	1991392	Hcv1.av93.c13.g232.i2	1986337	1994982	antisense	3
c13	Hcv1.av93.c13.g234.i1	1998972	2000201	Hcv1.av93.c13.g232.i1	1996694	2001272	sense	1
c13	Hcv1.av93.c13.g234.i1	1998972	2000201	Hcv1.av93.c13.g232.i2	1996694	2001272	sense	1
c13	Hcv1.av93.c13.g237.i1	2046284	2047015	Hcv1.av93.c13.g236.i1	2045543	2049007	antisense	1
c13	Hcv1.av93.c13.g237.i1	2046284	2047015	Hcv1.av93.c13.g236.i2	2045543	2049007	antisense	1
c13	Hcv1.av93.c13.g244.i1	2106532	2107100	Hcv1.av93.c13.g243.i1	2105497	2108184	sense	1
c13	Hcv1.av93.c13.g264.i1	2266209	2268537	Hcv1.av93.c13.g263.i1	2265913	2270718	sense	2
c13	Hcv1.av93.c13.g264.i1	2266209	2268537	Hcv1.av93.c13.g263.i2	2265913	2270718	sense	2
c13	Hcv1.av93.c13.g265.i1	2274197	2275988	Hcv1.av93.c13.g263.i1	2273767	2276120	antisense	6
c13	Hcv1.av93.c13.g265.i1	2274197	2275988	Hcv1.av93.c13.g263.i2	2273767	2276120	antisense	6
c13	Hcv1.av93.c13.g276.i1	2349258	2350152	Hcv1.av93.c13.g275.i1	2343408	2351014	sense	1
c13	Hcv1.av93.c13.g276.i1	2349258	2350152	Hcv1.av93.c13.g275.i2	2343408	2351014	sense	1
c13	Hcv1.av93.c13.g276.i1	2349258	2350152	Hcv1.av93.c13.g275.i3	2343408	2351014	sense	1
c13	Hcv1.av93.c13.g276.i1	2349258	2350152	Hcv1.av93.c13.g275.i4	2343408	2351014	sense	1
c13	Hcv1.av93.c13.g276.i1	2349258	2350152	Hcv1.av93.c13.g275.i5	2343408	2351014	sense	1
c13	Hcv1.av93.c13.g278.i1	2405290	2407832	Hcv1.av93.c13.g277.i1	2400851	2410179	sense	3
c13	Hcv1.av93.c13.g279.i1	2460931	2462815	Hcv1.av93.c13.g277.i1	2460873	2463358	antisense	6
c13	Hcv1.av93.c13.g289.i1	2550500	2553871	Hcv1.av93.c13.g288.i1	2550265	2553967	antisense	5
c13	Hcv1.av93.c13.g289.i2	2551080	2553871	Hcv1.av93.c13.g288.i1	2550265	2553967	antisense	4
c13	Hcv1.av93.c13.g306.i1	2697656	2699271	Hcv1.av93.c13.g305.i1	2695338	2702028	antisense	4
c13	Hcv1.av93.c13.g306.i1	2697656	2699271	Hcv1.av93.c13.g305.i2	2695338	2702028	antisense	4
c13	Hcv1.av93.c13.g327.i1	2819883	2823372	Hcv1.av93.c13.g326.i1	2819448	2823139	antisense	2
c13	Hcv1.av93.c13.g329.i1	2830605	2831105	Hcv1.av93.c13.g326.i1	2824523	2832853	antisense	1
c13	Hcv1.av93.c13.g329.i1	2830605	2831105	Hcv1.av93.c13.g328.i1	2825423	2832408	antisense	1
c13	Hcv1.av93.c13.g329.i1	2830605	2831105	Hcv1.av93.c13.g328.i2	2825423	2832408	antisense	1
c13	Hcv1.av93.c13.g332.i1	2853147	2854409	Hcv1.av93.c13.g331.i1	2851381	2855083	antisense	2
c13	Hcv1.av93.c13.g332.i1	2853147	2854409	Hcv1.av93.c13.g331.i2	2851381	2855083	antisense	2
c13	Hcv1.av93.c13.g36.i1	402752	403184	Hcv1.av93.c13.g35.i1	402395	405182	antisense	2
c13	Hcv1.av93.c13.g36.i1	402752	403184	Hcv1.av93.c13.g35.i2	402395	405182	antisense	2
c13	Hcv1.av93.c13.g36.i1	402752	403184	Hcv1.av93.c13.g35.i3	402395	405182	antisense	2
c13	Hcv1.av93.c13.g36.i1	402752	403184	Hcv1.av93.c13.g35.i4	402395	405182	antisense	2
c13	Hcv1.av93.c13.g37.i1	407345	411502	Hcv1.av93.c13.g35.i1	405234	411832	sense	2
c13	Hcv1.av93.c13.g37.i1	407345	411502	Hcv1.av93.c13.g35.i2	405234	411832	sense	2
c13	Hcv1.av93.c13.g37.i1	407345	411502	Hcv1.av93.c13.g35.i3	405234	411832	sense	2
c13	Hcv1.av93.c13.g37.i1	407345	411502	Hcv1.av93.c13.g35.i4	405234	411832	sense	2
c13	Hcv1.av93.c13.g376.i1	3182143	3184395	Hcv1.av93.c13.g375.i1	3181044	3196027	sense	2
c13	Hcv1.av93.c13.g377.i1	3187354	3188535	Hcv1.av93.c13.g375.i1	3181044	3196027	sense	2
c13	Hcv1.av93.c13.g39.i1	422769	430959	Hcv1.av93.c13.g38.i1	422482	431812	antisense	7
c13	Hcv1.av93.c13.g39.i1	422769	430959	Hcv1.av93.c13.g38.i2	422482	431812	antisense	7
c13	Hcv1.av93.c13.g406.i1	3516743	3519399	Hcv1.av93.c13.g405.i1	3514462	3519419	sense	1
c13	Hcv1.av93.c13.g41.i1	461801	462385	Hcv1.av93.c13.g40.i1	461669	463077	sense	1
c13	Hcv1.av93.c13.g416.i1	3627714	3628273	Hcv1.av93.c13.g415.i1	3626810	3628673	sense	1
c13	Hcv1.av93.c13.g416.i1	3627714	3628273	Hcv1.av93.c13.g415.i2	3626810	3628673	sense	1
c13	Hcv1.av93.c13.g422.i1	3712034	3717453	Hcv1.av93.c13.g421.i1	3711820	3718793	antisense	9
c13	Hcv1.av93.c13.g422.i2	3712034	3717453	Hcv1.av93.c13.g421.i1	3711820	3718793	antisense	9
c13	Hcv1.av93.c13.g422.i3	3712034	3717453	Hcv1.av93.c13.g421.i1	3711820	3718793	antisense	10
c13	Hcv1.av93.c13.g422.i4	3712261	3717453	Hcv1.av93.c13.g421.i1	3711820	3718793	antisense	9
c13	Hcv1.av93.c13.g432.i1	3840118	3843172	Hcv1.av93.c13.g430.i1	3839141	3843542	antisense	2
c13	Hcv1.av93.c13.g439.i32	3917765	3919544	Hcv1.av93.c13.g439.i15	3917538	3919987	sense	2
c13	Hcv1.av93.c13.g44.i1	508275	510932	Hcv1.av93.c13.g43.i1	508004	515233	antisense	7
c13	Hcv1.av93.c13.g44.i1	508275	510932	Hcv1.av93.c13.g43.i2	508004	515233	antisense	7
c13	Hcv1.av93.c13.g44.i2	508275	510932	Hcv1.av93.c13.g43.i1	508004	515233	antisense	6
c13	Hcv1.av93.c13.g44.i2	508275	510932	Hcv1.av93.c13.g43.i2	508004	515233	antisense	6
c13	Hcv1.av93.c13.g440.i1	3910279	3910913	Hcv1.av93.c13.g439.i1	3906678	3912785	sense	1
c13	Hcv1.av93.c13.g440.i1	3910279	3910913	Hcv1.av93.c13.g439.i2	3906678	3912785	sense	1
c13	Hcv1.av93.c13.g440.i1	3910279	3910913	Hcv1.av93.c13.g439.i3	3906678	3912785	sense	1
c13	Hcv1.av93.c13.g440.i1	3910279	3910913	Hcv1.av93.c13.g439.i4	3906678	3912785	sense	1
c13	Hcv1.av93.c13.g440.i1	3910279	3910913	Hcv1.av93.c13.g439.i5	3906678	3912785	sense	1
c13	Hcv1.av93.c13.g440.i1	3910279	3910913	Hcv1.av93.c13.g439.i7	3906678	3911922	sense	1
c13	Hcv1.av93.c13.g440.i1	3910279	3910913	Hcv1.av93.c13.g439.i8	3906678	3912785	sense	1
c13	Hcv1.av93.c13.g440.i1	3910279	3910913	Hcv1.av93.c13.g439.i9	3906678	3912785	sense	1
c13	Hcv1.av93.c13.g440.i1	3910279	3910913	Hcv1.av93.c13.g439.i10	3906678	3912785	sense	1
c13	Hcv1.av93.c13.g440.i1	3910279	3910913	Hcv1.av93.c13.g439.i11	3906678	3912785	sense	1
c13	Hcv1.av93.c13.g440.i1	3910279	3910913	Hcv1.av93.c13.g439.i12	3906678	3912785	sense	1
c13	Hcv1.av93.c13.g440.i1	3910279	3910913	Hcv1.av93.c13.g439.i13	3906678	3912785	sense	1
c13	Hcv1.av93.c13.g440.i1	3910279	3910913	Hcv1.av93.c13.g439.i14	3906678	3912785	sense	1
c13	Hcv1.av93.c13.g440.i1	3910279	3910913	Hcv1.av93.c13.g439.i15	3906678	3912785	sense	1
c13	Hcv1.av93.c13.g440.i1	3910279	3910913	Hcv1.av93.c13.g439.i17	3906678	3912785	sense	1
c13	Hcv1.av93.c13.g440.i1	3910279	3910913	Hcv1.av93.c13.g439.i18	3906678	3912785	sense	1
c13	Hcv1.av93.c13.g440.i1	3910279	3910913	Hcv1.av93.c13.g439.i19	3906678	3912785	sense	1
c13	Hcv1.av93.c13.g440.i1	3910279	3910913	Hcv1.av93.c13.g439.i20	3906678	3912785	sense	1
c13	Hcv1.av93.c13.g440.i1	3910279	3910913	Hcv1.av93.c13.g439.i21	3906678	3912785	sense	1
c13	Hcv1.av93.c13.g440.i1	3910279	3910913	Hcv1.av93.c13.g439.i22	3906678	3912785	sense	1
c13	Hcv1.av93.c13.g440.i1	3910279	3910913	Hcv1.av93.c13.g439.i23	3906678	3912785	sense	1
c13	Hcv1.av93.c13.g440.i1	3910279	3910913	Hcv1.av93.c13.g439.i24	3906678	3912785	sense	1
c13	Hcv1.av93.c13.g440.i1	3910279	3910913	Hcv1.av93.c13.g439.i25	3906678	3912785	sense	1
c13	Hcv1.av93.c13.g440.i1	3910279	3910913	Hcv1.av93.c13.g439.i26	3906678	3912785	sense	1
c13	Hcv1.av93.c13.g440.i1	3910279	3910913	Hcv1.av93.c13.g439.i27	3906678	3912785	sense	1
c13	Hcv1.av93.c13.g440.i1	3910279	3910913	Hcv1.av93.c13.g439.i28	3906678	3912785	sense	1
c13	Hcv1.av93.c13.g442.i1	3932436	3933222	Hcv1.av93.c13.g441.i1	3931495	3939384	sense	1
c13	Hcv1.av93.c13.g445.i1	3973418	3976595	Hcv1.av93.c13.g444.i1	3973263	3976633	sense	1
c13	Hcv1.av93.c13.g445.i1	3973418	3976595	Hcv1.av93.c13.g444.i2	3973263	3976633	sense	1
c13	Hcv1.av93.c13.g445.i1	3973418	3976595	Hcv1.av93.c13.g444.i3	3973263	3976633	sense	1
c13	Hcv1.av93.c13.g455.i1	4094333	4097787	Hcv1.av93.c13.g453.i1	4089825	4097960	antisense	5
c13	Hcv1.av93.c13.g455.i1	4094333	4097787	Hcv1.av93.c13.g453.i2	4089825	4097960	antisense	5
c13	Hcv1.av93.c13.g459.i1	4138417	4140518	Hcv1.av93.c13.g458.i1	4137039	4154859	antisense	2
c13	Hcv1.av93.c13.g459.i1	4138417	4140518	Hcv1.av93.c13.g458.i2	4137405	4154818	antisense	2
c13	Hcv1.av93.c13.g459.i1	4138417	4140518	Hcv1.av93.c13.g458.i3	4137008	4154859	antisense	2
c13	Hcv1.av93.c13.g459.i2	4138417	4140518	Hcv1.av93.c13.g458.i1	4137039	4154859	antisense	3
c13	Hcv1.av93.c13.g459.i2	4138417	4140518	Hcv1.av93.c13.g458.i2	4137405	4154818	antisense	3
c13	Hcv1.av93.c13.g459.i2	4138417	4140518	Hcv1.av93.c13.g458.i3	4137008	4154859	antisense	3
c13	Hcv1.av93.c13.g460.i1	4140578	4149891	Hcv1.av93.c13.g458.i1	4137039	4154859	antisense	14
c13	Hcv1.av93.c13.g460.i1	4140578	4149891	Hcv1.av93.c13.g458.i2	4137405	4154818	antisense	14
c13	Hcv1.av93.c13.g460.i1	4140578	4149891	Hcv1.av93.c13.g458.i3	4137008	4154859	antisense	14
c13	Hcv1.av93.c13.g462.i1	4151210	4151904	Hcv1.av93.c13.g458.i1	4137039	4154859	antisense	2
c13	Hcv1.av93.c13.g462.i1	4151210	4151904	Hcv1.av93.c13.g458.i2	4137405	4154818	antisense	2
c13	Hcv1.av93.c13.g462.i1	4151210	4151904	Hcv1.av93.c13.g458.i3	4137008	4154859	antisense	2
c13	Hcv1.av93.c13.g462.i1	4151210	4151904	Hcv1.av93.c13.g461.i1	4142196	4160651	sense	2
c13	Hcv1.av93.c13.g463.i1	4158717	4159586	Hcv1.av93.c13.g461.i1	4142196	4160651	sense	1
c13	Hcv1.av93.c13.g468.i1	4233855	4234885	Hcv1.av93.c13.g467.i1	4232963	4236969	sense	1
c13	Hcv1.av93.c13.g472.i1	4280062	4284939	Hcv1.av93.c13.g471.i1	4279356	4285039	antisense	10
c13	Hcv1.av93.c13.g472.i1	4280062	4284939	Hcv1.av93.c13.g471.i2	4279356	4285039	antisense	10
c13	Hcv1.av93.c13.g472.i2	4280062	4284939	Hcv1.av93.c13.g471.i1	4279356	4285039	antisense	11
c13	Hcv1.av93.c13.g472.i2	4280062	4284939	Hcv1.av93.c13.g471.i2	4279356	4285039	antisense	11
c13	Hcv1.av93.c13.g477.i1	4344018	4344936	Hcv1.av93.c13.g471.i1	4343414	4345499	sense	1
c13	Hcv1.av93.c13.g477.i1	4344018	4344936	Hcv1.av93.c13.g471.i2	4343323	4347345	sense	1
c13	Hcv1.av93.c13.g49.i1	538171	539000	Hcv1.av93.c13.g47.i1	528554	539015	antisense	1
c13	Hcv1.av93.c13.g49.i1	538171	539000	Hcv1.av93.c13.g48.i1	534782	540907	sense	1
c13	Hcv1.av93.c13.g507.i1	4656299	4659089	Hcv1.av93.c13.g506.i1	4654292	4660250	sense	1
c13	Hcv1.av93.c13.g517.i1	4728389	4730313	Hcv1.av93.c13.g516.i1	4727548	4733069	antisense	3
c13	Hcv1.av93.c13.g517.i1	4728389	4730313	Hcv1.av93.c13.g516.i2	4727548	4733069	antisense	3
c13	Hcv1.av93.c13.g526.i1	4782777	4784712	Hcv1.av93.c13.g525.i1	4781990	4786934	sense	3
c13	Hcv1.av93.c13.g526.i1	4782777	4784712	Hcv1.av93.c13.g525.i2	4781990	4786934	sense	3
c13	Hcv1.av93.c13.g533.i1	4841857	4845515	Hcv1.av93.c13.g532.i1	4836792	4846017	sense	3
c13	Hcv1.av93.c13.g540.i1	4945874	4951655	Hcv1.av93.c13.g539.i1	4943945	4955481	antisense	2
c13	Hcv1.av93.c13.g540.i1	4945874	4951655	Hcv1.av93.c13.g539.i2	4943945	4955481	antisense	2
c13	Hcv1.av93.c13.g540.i2	4949180	4951622	Hcv1.av93.c13.g539.i1	4943945	4955481	antisense	2
c13	Hcv1.av93.c13.g540.i2	4949180	4951622	Hcv1.av93.c13.g539.i2	4943945	4955481	antisense	2
c13	Hcv1.av93.c13.g540.i3	4949193	4951620	Hcv1.av93.c13.g539.i1	4943945	4955481	antisense	2
c13	Hcv1.av93.c13.g540.i3	4949193	4951620	Hcv1.av93.c13.g539.i2	4943945	4955481	antisense	2
c13	Hcv1.av93.c13.g545.i1	5033758	5038198	Hcv1.av93.c13.g543.i1	5030921	5041298	antisense	2
c13	Hcv1.av93.c13.g545.i1	5033758	5038198	Hcv1.av93.c13.g543.i2	5030921	5041298	antisense	2
c13	Hcv1.av93.c13.g546.i1	5051637	5053621	Hcv1.av93.c13.g543.i1	5048767	5055170	sense	1
c13	Hcv1.av93.c13.g546.i1	5051637	5053621	Hcv1.av93.c13.g543.i2	5048767	5055170	sense	1
c13	Hcv1.av93.c13.g549.i1	5070242	5072540	Hcv1.av93.c13.g548.i1	5063889	5074861	antisense	2
c13	Hcv1.av93.c13.g550.i1	5070897	5071392	Hcv1.av93.c13.g548.i1	5063889	5074861	sense	2
c13	Hcv1.av93.c13.g550.i1	5070897	5071392	Hcv1.av93.c13.g549.i1	5070843	5071550	antisense	2
c13	Hcv1.av93.c13.g562.i8	5172354	5173159	Hcv1.av93.c13.g562.i1	5172107	5173909	sense	2
c13	Hcv1.av93.c13.g564.i1	5181225	5181802	Hcv1.av93.c13.g563.i1	5178791	5196437	sense	2
c13	Hcv1.av93.c13.g565.i1	5182989	5183895	Hcv1.av93.c13.g563.i1	5178791	5196437	sense	2
c13	Hcv1.av93.c13.g566.i1	5184411	5185130	Hcv1.av93.c13.g563.i1	5178791	5196437	sense	1
c13	Hcv1.av93.c13.g567.i1	5186547	5186981	Hcv1.av93.c13.g563.i1	5178791	5196437	sense	1
c13	Hcv1.av93.c13.g568.i1	5187841	5188614	Hcv1.av93.c13.g563.i1	5178791	5196437	antisense	1
c13	Hcv1.av93.c13.g569.i1	5188629	5189136	Hcv1.av93.c13.g563.i1	5178791	5196437	antisense	1
c13	Hcv1.av93.c13.g570.i1	5189181	5189492	Hcv1.av93.c13.g563.i1	5178791	5196437	antisense	1
c13	Hcv1.av93.c13.g571.i1	5189554	5190258	Hcv1.av93.c13.g563.i1	5178791	5196437	antisense	1
c13	Hcv1.av93.c13.g572.i1	5191356	5192448	Hcv1.av93.c13.g563.i1	5178791	5196437	antisense	1
c13	Hcv1.av93.c13.g577.i1	5257896	5258978	Hcv1.av93.c13.g576.i1	5256855	5260902	sense	1
c13	Hcv1.av93.c13.g577.i1	5257896	5258978	Hcv1.av93.c13.g576.i2	5256855	5260902	sense	1
c13	Hcv1.av93.c13.g578.i1	5272983	5274287	Hcv1.av93.c13.g576.i1	5272926	5274859	sense	1
c13	Hcv1.av93.c13.g578.i1	5272983	5274287	Hcv1.av93.c13.g576.i2	5272926	5275685	sense	1
c13	Hcv1.av93.c13.g586.i1	5322513	5323410	Hcv1.av93.c13.g585.i1	5319357	5327835	sense	1
c13	Hcv1.av93.c13.g586.i1	5322513	5323410	Hcv1.av93.c13.g585.i2	5319357	5327835	sense	1
c13	Hcv1.av93.c13.g586.i1	5322513	5323410	Hcv1.av93.c13.g585.i3	5319357	5327835	sense	1
c13	Hcv1.av93.c13.g586.i1	5322513	5323410	Hcv1.av93.c13.g585.i4	5319357	5327835	sense	1
c13	Hcv1.av93.c13.g586.i1	5322513	5323410	Hcv1.av93.c13.g585.i5	5319357	5327835	sense	1
c13	Hcv1.av93.c13.g587.i1	5324453	5325317	Hcv1.av93.c13.g585.i1	5319357	5327835	sense	1
c13	Hcv1.av93.c13.g587.i1	5324453	5325317	Hcv1.av93.c13.g585.i2	5319357	5327835	sense	1
c13	Hcv1.av93.c13.g587.i1	5324453	5325317	Hcv1.av93.c13.g585.i3	5319357	5327835	sense	1
c13	Hcv1.av93.c13.g587.i1	5324453	5325317	Hcv1.av93.c13.g585.i4	5319357	5327835	sense	1
c13	Hcv1.av93.c13.g587.i1	5324453	5325317	Hcv1.av93.c13.g585.i5	5319357	5327835	sense	1
c13	Hcv1.av93.c13.g588.i1	5345802	5347144	Hcv1.av93.c13.g585.i1	5344991	5350842	antisense	1
c13	Hcv1.av93.c13.g588.i1	5345802	5347144	Hcv1.av93.c13.g585.i2	5344991	5350842	antisense	1
c13	Hcv1.av93.c13.g588.i1	5345802	5347144	Hcv1.av93.c13.g585.i4	5344991	5350842	antisense	1
c13	Hcv1.av93.c13.g588.i1	5345802	5347144	Hcv1.av93.c13.g585.i5	5344991	5350842	antisense	1
c13	Hcv1.av93.c13.g589.i1	5354766	5359190	Hcv1.av93.c13.g585.i1	5354181	5359825	sense	2
c13	Hcv1.av93.c13.g589.i1	5354766	5359190	Hcv1.av93.c13.g585.i5	5354181	5359825	sense	2
c13	Hcv1.av93.c13.g598.i1	5394252	5396953	Hcv1.av93.c13.g597.i1	5392826	5403367	sense	4
c13	Hcv1.av93.c13.g598.i1	5394252	5396953	Hcv1.av93.c13.g597.i3	5393212	5405577	sense	4
c13	Hcv1.av93.c13.g60.i1	663165	665269	Hcv1.av93.c13.g59.i1	659418	670666	antisense	2
c13	Hcv1.av93.c13.g602.i1	5450258	5451107	Hcv1.av93.c13.g601.i1	5448520	5452530	sense	1
c13	Hcv1.av93.c13.g604.i1	5455719	5456118	Hcv1.av93.c13.g603.i1	5455671	5456130	sense	1
c13	Hcv1.av93.c13.g61.i1	665412	666266	Hcv1.av93.c13.g59.i1	659418	670666	sense	1
c13	Hcv1.av93.c13.g616.i1	5610360	5611489	Hcv1.av93.c13.g615.i2	5609406	5611618	sense	1
c13	Hcv1.av93.c13.g616.i1	5610360	5611489	Hcv1.av93.c13.g615.i3	5609406	5611618	sense	1
c13	Hcv1.av93.c13.g616.i1	5610360	5611489	Hcv1.av93.c13.g615.i4	5609406	5611618	sense	1
c13	Hcv1.av93.c13.g617.i1	5614715	5615452	Hcv1.av93.c13.g615.i2	5614400	5619279	sense	1
c13	Hcv1.av93.c13.g617.i1	5614715	5615452	Hcv1.av93.c13.g615.i3	5614400	5619279	sense	1
c13	Hcv1.av93.c13.g617.i1	5614715	5615452	Hcv1.av93.c13.g615.i4	5614400	5619279	sense	1
c13	Hcv1.av93.c13.g630.i1	5722393	5726055	Hcv1.av93.c13.g629.i1	5720537	5726953	antisense	2
c13	Hcv1.av93.c13.g630.i1	5722393	5726055	Hcv1.av93.c13.g629.i2	5720537	5726953	antisense	2
c13	Hcv1.av93.c13.g632.i1	5732182	5739007	Hcv1.av93.c13.g631.i1	5730679	5739179	antisense	14
c13	Hcv1.av93.c13.g632.i1	5732182	5739007	Hcv1.av93.c13.g631.i2	5730679	5739179	antisense	14
c13	Hcv1.av93.c13.g632.i1	5732182	5739007	Hcv1.av93.c13.g631.i3	5730679	5739179	antisense	14
c13	Hcv1.av93.c13.g632.i2	5732182	5739007	Hcv1.av93.c13.g631.i1	5730679	5739179	antisense	13
c13	Hcv1.av93.c13.g632.i2	5732182	5739007	Hcv1.av93.c13.g631.i2	5730679	5739179	antisense	13
c13	Hcv1.av93.c13.g632.i2	5732182	5739007	Hcv1.av93.c13.g631.i3	5730679	5739179	antisense	13
c13	Hcv1.av93.c13.g632.i3	5732182	5739007	Hcv1.av93.c13.g631.i1	5730679	5739179	antisense	14
c13	Hcv1.av93.c13.g632.i3	5732182	5739007	Hcv1.av93.c13.g631.i2	5730679	5739179	antisense	14
c13	Hcv1.av93.c13.g632.i3	5732182	5739007	Hcv1.av93.c13.g631.i3	5730679	5739179	antisense	14
c13	Hcv1.av93.c13.g634.i1	5767108	5769414	Hcv1.av93.c13.g633.i1	5765145	5769606	sense	3
c13	Hcv1.av93.c13.g634.i1	5767108	5769414	Hcv1.av93.c13.g633.i2	5765145	5769606	sense	3
c13	Hcv1.av93.c13.g635.i1	5788691	5792392	Hcv1.av93.c13.g633.i1	5788467	5792495	antisense	2
c13	Hcv1.av93.c13.g635.i1	5788691	5792392	Hcv1.av93.c13.g633.i2	5788467	5792495	antisense	2
c13	Hcv1.av93.c13.g636.i1	5798310	5799977	Hcv1.av93.c13.g633.i1	5794264	5805488	antisense	2
c13	Hcv1.av93.c13.g636.i1	5798310	5799977	Hcv1.av93.c13.g633.i2	5794264	5805488	antisense	2
c13	Hcv1.av93.c13.g640.i1	5856305	5861374	Hcv1.av93.c13.g639.i1	5854036	5862136	sense	12
c13	Hcv1.av93.c13.g642.i1	5873314	5875338	Hcv1.av93.c13.g641.i1	5873077	5875778	sense	4
c13	Hcv1.av93.c13.g642.i1	5873314	5875338	Hcv1.av93.c13.g641.i2	5873077	5875778	sense	4
c13	Hcv1.av93.c13.g642.i1	5873314	5875338	Hcv1.av93.c13.g641.i3	5873077	5875778	sense	4
c13	Hcv1.av93.c13.g647.i1	5929969	5930413	Hcv1.av93.c13.g645.i1	5928496	5932003	sense	1
c13	Hcv1.av93.c13.g653.i1	5973091	5975196	Hcv1.av93.c13.g652.i1	5972900	5986808	antisense	4
c13	Hcv1.av93.c13.g654.i1	5981164	5982703	Hcv1.av93.c13.g652.i1	5972900	5986808	sense	3
c13	Hcv1.av93.c13.g66.i1	690974	700532	Hcv1.av93.c13.g65.i1	690147	705636	antisense	7
c13	Hcv1.av93.c13.g66.i1	690974	700532	Hcv1.av93.c13.g65.i2	690147	705636	antisense	7
c13	Hcv1.av93.c13.g665.i1	6059642	6060279	Hcv1.av93.c13.g663.i1	6058827	6065648	sense	1
c13	Hcv1.av93.c13.g67.i1	702453	703946	Hcv1.av93.c13.g65.i1	690147	705636	sense	2
c13	Hcv1.av93.c13.g67.i1	702453	703946	Hcv1.av93.c13.g65.i2	690147	705636	sense	2
c13	Hcv1.av93.c13.g684.i1	6329118	6329362	Hcv1.av93.c13.g683.i1	6327864	6331833	sense	1
c13	Hcv1.av93.c13.g685.i1	6329556	6331776	Hcv1.av93.c13.g683.i1	6327864	6331833	sense	1
c13	Hcv1.av93.c13.g687.i1	6353895	6358053	Hcv1.av93.c13.g686.i1	6353423	6358112	sense	2
c13	Hcv1.av93.c13.g78.i1	775940	780996	Hcv1.av93.c13.g77.i1	775279	781952	antisense	2
c13	Hcv1.av93.c13.g88.i1	811121	816671	Hcv1.av93.c13.g87.i1	810968	823400	antisense	7
c13	Hcv1.av93.c13.g89.i1	817889	822181	Hcv1.av93.c13.g87.i1	810968	823400	sense	1
c13	Hcv1.av93.c13.g9.i1	156439	157850	Hcv1.av93.c13.g8.i1	153054	157824	antisense	1
c13	Hcv1.av93.c13.g93.i1	840082	845773	Hcv1.av93.c13.g91.i1	839480	846308	sense	2
c13	Hcv1.av93.c13.g93.i1	840082	845773	Hcv1.av93.c13.g91.i2	839480	846308	sense	2
c13	Hcv1.av93.c13.g97.i1	908708	909928	Hcv1.av93.c13.g95.i3	907718	911118	antisense	3
c2	Hcv1.av93.c2.g1023.i1	6093855	6096166	Hcv1.av93.c2.g1022.i1	6093780	6098213	sense	5
c2	Hcv1.av93.c2.g1023.i1	6093855	6096166	Hcv1.av93.c2.g1022.i2	6093780	6097521	sense	5
c2	Hcv1.av93.c2.g1023.i1	6093855	6096166	Hcv1.av93.c2.g1022.i3	6093780	6098213	sense	5
c2	Hcv1.av93.c2.g1023.i1	6093855	6096166	Hcv1.av93.c2.g1022.i4	6093780	6097521	sense	5
c2	Hcv1.av93.c2.g1023.i1	6093855	6096166	Hcv1.av93.c2.g1022.i5	6093780	6100750	sense	5
c2	Hcv1.av93.c2.g1023.i1	6093855	6096166	Hcv1.av93.c2.g1022.i6	6093780	6097521	sense	5
c2	Hcv1.av93.c2.g1023.i1	6093855	6096166	Hcv1.av93.c2.g1022.i7	6093780	6100750	sense	5
c2	Hcv1.av93.c2.g1023.i1	6093855	6096166	Hcv1.av93.c2.g1022.i8	6093780	6100750	sense	5
c2	Hcv1.av93.c2.g1023.i1	6093855	6096166	Hcv1.av93.c2.g1022.i9	6093398	6100750	sense	5
c2	Hcv1.av93.c2.g1028.i1	6136018	6141745	Hcv1.av93.c2.g1027.i2	6132022	6142921	sense	15
c2	Hcv1.av93.c2.g1040.i3	6217146	6219011	Hcv1.av93.c2.g1042.i1	6216904	6219354	antisense	5
c2	Hcv1.av93.c2.g1040.i3	6217146	6219011	Hcv1.av93.c2.g1042.i2	6216904	6219354	antisense	5
c2	Hcv1.av93.c2.g1040.i3	6217146	6219011	Hcv1.av93.c2.g1042.i3	6216904	6219354	antisense	5
c2	Hcv1.av93.c2.g1041.i1	6198008	6200786	Hcv1.av93.c2.g1039.i1	6197346	6203799	sense	2
c2	Hcv1.av93.c2.g1043.i1	6224445	6228725	Hcv1.av93.c2.g1042.i1	6223240	6228737	antisense	1
c2	Hcv1.av93.c2.g1043.i1	6224445	6228725	Hcv1.av93.c2.g1042.i2	6223240	6228737	antisense	1
c2	Hcv1.av93.c2.g1043.i1	6224445	6228725	Hcv1.av93.c2.g1042.i3	6223240	6228737	antisense	1
c2	Hcv1.av93.c2.g1050.i1	6249184	6250515	Hcv1.av93.c2.g1049.i1	6248766	6250687	antisense	3
c2	Hcv1.av93.c2.g1050.i1	6249184	6250515	Hcv1.av93.c2.g1049.i2	6248766	6250687	antisense	3
c2	Hcv1.av93.c2.g1050.i1	6249184	6250515	Hcv1.av93.c2.g1049.i3	6248766	6250687	antisense	3
c2	Hcv1.av93.c2.g1066.i1	6313252	6317086	Hcv1.av93.c2.g1065.i1	6312314	6320535	antisense	4
c2	Hcv1.av93.c2.g1066.i1	6313252	6317086	Hcv1.av93.c2.g1065.i2	6312314	6320535	antisense	4
c2	Hcv1.av93.c2.g1066.i1	6313252	6317086	Hcv1.av93.c2.g1065.i3	6312314	6319289	antisense	4
c2	Hcv1.av93.c2.g1067.i1	6313467	6314842	Hcv1.av93.c2.g1065.i1	6312314	6320535	sense	1
c2	Hcv1.av93.c2.g1067.i1	6313467	6314842	Hcv1.av93.c2.g1065.i2	6312314	6320535	sense	1
c2	Hcv1.av93.c2.g1067.i1	6313467	6314842	Hcv1.av93.c2.g1065.i3	6312314	6319289	sense	1
c2	Hcv1.av93.c2.g1067.i1	6313467	6314842	Hcv1.av93.c2.g1066.i1	6313357	6315258	antisense	1
c2	Hcv1.av93.c2.g1078.i1	6380281	6381475	Hcv1.av93.c2.g1077.i1	6378209	6381688	antisense	1
c2	Hcv1.av93.c2.g1090.i1	6471737	6472941	Hcv1.av93.c2.g1088.i1	6466827	6474718	sense	1
c2	Hcv1.av93.c2.g1090.i1	6471737	6472941	Hcv1.av93.c2.g1089.i1	6471670	6474718	sense	1
c2	Hcv1.av93.c2.g1105.i1	6547353	6547682	Hcv1.av93.c2.g1104.i1	6545082	6562199	antisense	1
c2	Hcv1.av93.c2.g1117.i1	6617670	6618771	Hcv1.av93.c2.g1116.i1	6615903	6618888	sense	1
c2	Hcv1.av93.c2.g1127.i1	6671789	6677235	Hcv1.av93.c2.g1126.i1	6671711	6685327	antisense	2
c2	Hcv1.av93.c2.g1128.i1	6677931	6679350	Hcv1.av93.c2.g1126.i1	6671711	6685327	antisense	1
c2	Hcv1.av93.c2.g1136.i1	6739928	6746580	Hcv1.av93.c2.g1135.i1	6739881	6746270	antisense	8
c2	Hcv1.av93.c2.g1136.i1	6739928	6746580	Hcv1.av93.c2.g1135.i2	6739881	6746270	antisense	8
c2	Hcv1.av93.c2.g1136.i1	6739928	6746580	Hcv1.av93.c2.g1135.i3	6739881	6746270	antisense	8
c2	Hcv1.av93.c2.g1136.i2	6741411	6746580	Hcv1.av93.c2.g1135.i1	6739881	6746270	antisense	8
c2	Hcv1.av93.c2.g1136.i2	6741411	6746580	Hcv1.av93.c2.g1135.i2	6739881	6746270	antisense	8
c2	Hcv1.av93.c2.g1136.i2	6741411	6746580	Hcv1.av93.c2.g1135.i3	6739881	6746270	antisense	8
c2	Hcv1.av93.c2.g1139.i1	6757317	6757932	Hcv1.av93.c2.g1138.i1	6756658	6758060	antisense	1
c2	Hcv1.av93.c2.g1139.i1	6757317	6757932	Hcv1.av93.c2.g1138.i2	6756658	6758060	antisense	1
c2	Hcv1.av93.c2.g1157.i1	6829391	6830135	Hcv1.av93.c2.g1156.i1	6829325	6830262	antisense	1
c2	Hcv1.av93.c2.g1163.i1	6877946	6880317	Hcv1.av93.c2.g1162.i1	6876181	6880606	antisense	3
c2	Hcv1.av93.c2.g1171.i1	6912383	6914155	Hcv1.av93.c2.g1170.i1	6912387	6914569	antisense	5
c2	Hcv1.av93.c2.g1171.i1	6912383	6914155	Hcv1.av93.c2.g1170.i2	6912387	6914569	antisense	5
c2	Hcv1.av93.c2.g12.i1	67663	68578	Hcv1.av93.c2.g11.i1	67409	72697	antisense	1
c2	Hcv1.av93.c2.g121.i1	765831	767633	Hcv1.av93.c2.g120.i1	765258	768311	sense	1
c2	Hcv1.av93.c2.g1216.i1	7156696	7158140	Hcv1.av93.c2.g1215.i1	7156001	7159963	sense	1
c2	Hcv1.av93.c2.g1216.i1	7156696	7158140	Hcv1.av93.c2.g1215.i2	7156001	7159963	sense	1
c2	Hcv1.av93.c2.g1216.i1	7156696	7158140	Hcv1.av93.c2.g1215.i3	7156001	7159963	sense	1
c2	Hcv1.av93.c2.g1216.i1	7156696	7158140	Hcv1.av93.c2.g1215.i4	7156001	7159963	sense	1
c2	Hcv1.av93.c2.g1233.i1	7269228	7270276	Hcv1.av93.c2.g1232.i1	7268565	7270918	sense	1
c2	Hcv1.av93.c2.g1234.i1	7272237	7275755	Hcv1.av93.c2.g1232.i1	7271006	7276556	antisense	3
c2	Hcv1.av93.c2.g1240.i1	7306614	7308787	Hcv1.av93.c2.g1238.i1	7306523	7309733	antisense	2
c2	Hcv1.av93.c2.g1240.i1	7306614	7308787	Hcv1.av93.c2.g1239.i1	7306523	7309733	antisense	2
c2	Hcv1.av93.c2.g1241.i1	7312978	7318327	Hcv1.av93.c2.g1238.i1	7312746	7327679	antisense	9
c2	Hcv1.av93.c2.g1241.i1	7312978	7318327	Hcv1.av93.c2.g1239.i1	7312746	7327679	antisense	9
c2	Hcv1.av93.c2.g1242.i1	7324364	7326637	Hcv1.av93.c2.g1238.i1	7312746	7327679	antisense	2
c2	Hcv1.av93.c2.g1242.i1	7324364	7326637	Hcv1.av93.c2.g1239.i1	7312746	7327679	antisense	2
c2	Hcv1.av93.c2.g1244.i1	7335109	7341563	Hcv1.av93.c2.g1243.i1	7335477	7345004	antisense	14
c2	Hcv1.av93.c2.g1244.i1	7335109	7341563	Hcv1.av93.c2.g1243.i2	7335477	7345004	antisense	14
c2	Hcv1.av93.c2.g1245.i1	7341655	7344106	Hcv1.av93.c2.g1243.i1	7335477	7345004	antisense	5
c2	Hcv1.av93.c2.g1245.i1	7341655	7344106	Hcv1.av93.c2.g1243.i2	7335477	7345004	antisense	5
c2	Hcv1.av93.c2.g1246.i1	7344220	7351788	Hcv1.av93.c2.g1243.i1	7345107	7351793	antisense	13
c2	Hcv1.av93.c2.g1246.i1	7344220	7351788	Hcv1.av93.c2.g1243.i2	7345107	7351810	antisense	13
c2	Hcv1.av93.c2.g1246.i2	7344392	7351788	Hcv1.av93.c2.g1243.i1	7345107	7351793	antisense	13
c2	Hcv1.av93.c2.g1246.i2	7344392	7351788	Hcv1.av93.c2.g1243.i2	7345107	7351810	antisense	13
c2	Hcv1.av93.c2.g1259.i1	7433882	7438441	Hcv1.av93.c2.g1258.i1	7432289	7441367	sense	3
c2	Hcv1.av93.c2.g1265.i1	7477925	7479712	Hcv1.av93.c2.g1264.i1	7477518	7482346	antisense	2
c2	Hcv1.av93.c2.g1266.i1	7486159	7486906	Hcv1.av93.c2.g1264.i1	7482532	7487972	sense	1
c2	Hcv1.av93.c2.g1285.i1	7633752	7639116	Hcv1.av93.c2.g1284.i4	7633537	7638889	antisense	6
c2	Hcv1.av93.c2.g1290.i1	7677825	7679167	Hcv1.av93.c2.g1289.i1	7677485	7679452	antisense	4
c2	Hcv1.av93.c2.g1290.i2	7677825	7679167	Hcv1.av93.c2.g1289.i1	7677485	7679452	antisense	3
c2	Hcv1.av93.c2.g1298.i1	7733693	7735017	Hcv1.av93.c2.g1297.i1	7732254	7739062	antisense	4
c2	Hcv1.av93.c2.g13.i1	69706	71269	Hcv1.av93.c2.g11.i1	67409	72697	antisense	1
c2	Hcv1.av93.c2.g130.i1	806333	812279	Hcv1.av93.c2.g129.i1	803151	812296	antisense	4
c2	Hcv1.av93.c2.g133.i1	824134	825486	Hcv1.av93.c2.g132.i1	823833	825547	sense	1
c2	Hcv1.av93.c2.g1333.i1	8000322	8004871	Hcv1.av93.c2.g1326.i1	8000165	8010481	sense	1
c2	Hcv1.av93.c2.g1333.i1	8000322	8004871	Hcv1.av93.c2.g1326.i2	8000165	8010481	sense	1
c2	Hcv1.av93.c2.g1334.i1	8005524	8010197	Hcv1.av93.c2.g1326.i1	8000165	8010481	sense	1
c2	Hcv1.av93.c2.g1334.i1	8005524	8010197	Hcv1.av93.c2.g1326.i2	8000165	8010481	sense	1
c2	Hcv1.av93.c2.g1349.i1	8092042	8093179	Hcv1.av93.c2.g1348.i3	8091050	8096144	sense	1
c2	Hcv1.av93.c2.g1357.i1	8146138	8151642	Hcv1.av93.c2.g1356.i1	8139704	8152999	antisense	2
c2	Hcv1.av93.c2.g1357.i1	8146138	8151642	Hcv1.av93.c2.g1356.i2	8139704	8152999	antisense	2
c2	Hcv1.av93.c2.g1371.i1	8190909	8192962	Hcv1.av93.c2.g1370.i1	8190622	8194159	sense	1
c2	Hcv1.av93.c2.g1371.i1	8190909	8192962	Hcv1.av93.c2.g1370.i2	8190622	8194159	sense	1
c2	Hcv1.av93.c2.g1375.i1	8227873	8228291	Hcv1.av93.c2.g1374.i1	8227635	8240639	antisense	1
c2	Hcv1.av93.c2.g1376.i1	8232498	8232839	Hcv1.av93.c2.g1374.i1	8227635	8240639	antisense	1
c2	Hcv1.av93.c2.g1382.i1	8278926	8279876	Hcv1.av93.c2.g1381.i1	8278706	8280486	antisense	1
c2	Hcv1.av93.c2.g1393.i1	8341409	8343743	Hcv1.av93.c2.g1392.i1	8341085	8343951	antisense	9
c2	Hcv1.av93.c2.g1393.i1	8341409	8343743	Hcv1.av93.c2.g1392.i2	8341085	8343951	antisense	9
c2	Hcv1.av93.c2.g14.i1	73355	73741	Hcv1.av93.c2.g11.i1	72808	73785	sense	1
c2	Hcv1.av93.c2.g1413.i1	8429597	8430971	Hcv1.av93.c2.g1412.i2	8423428	8435752	antisense	3
c2	Hcv1.av93.c2.g1413.i2	8429597	8430971	Hcv1.av93.c2.g1412.i2	8423428	8435752	antisense	2
c2	Hcv1.av93.c2.g1414.i1	8433183	8435936	Hcv1.av93.c2.g1412.i2	8423428	8435752	antisense	8
c2	Hcv1.av93.c2.g1416.i1	8446738	8447729	Hcv1.av93.c2.g1415.i1	8444102	8449582	sense	1
c2	Hcv1.av93.c2.g1416.i1	8446738	8447729	Hcv1.av93.c2.g1415.i2	8444102	8449582	sense	1
c2	Hcv1.av93.c2.g1416.i1	8446738	8447729	Hcv1.av93.c2.g1415.i3	8444102	8449582	sense	1
c2	Hcv1.av93.c2.g1420.i1	8461434	8463621	Hcv1.av93.c2.g1419.i1	8460285	8464523	sense	1
c2	Hcv1.av93.c2.g1428.i1	8521804	8523796	Hcv1.av93.c2.g1427.i1	8520345	8525775	antisense	2
c2	Hcv1.av93.c2.g1433.i1	8551505	8552680	Hcv1.av93.c2.g1432.i1	8547294	8553323	sense	1
c2	Hcv1.av93.c2.g1434.i1	8557959	8561735	Hcv1.av93.c2.g1432.i1	8557730	8562248	sense	1
c2	Hcv1.av93.c2.g1441.i1	8608230	8610066	Hcv1.av93.c2.g1440.i1	8596930	8611299	sense	2
c2	Hcv1.av93.c2.g1450.i1	8645085	8645861	Hcv1.av93.c2.g1449.i1	8644454	8646322	antisense	2
c2	Hcv1.av93.c2.g1454.i1	8663619	8668198	Hcv1.av93.c2.g1453.i1	8663200	8671033	antisense	1
c2	Hcv1.av93.c2.g1454.i1	8663619	8668198	Hcv1.av93.c2.g1453.i2	8663200	8671033	antisense	1
c2	Hcv1.av93.c2.g1455.i1	8668557	8670653	Hcv1.av93.c2.g1453.i1	8663200	8671033	antisense	1
c2	Hcv1.av93.c2.g1455.i1	8668557	8670653	Hcv1.av93.c2.g1453.i2	8663200	8671033	antisense	1
c2	Hcv1.av93.c2.g1457.i1	8678662	8679341	Hcv1.av93.c2.g1456.i1	8677795	8682376	sense	1
c2	Hcv1.av93.c2.g1457.i1	8678662	8679341	Hcv1.av93.c2.g1456.i2	8677795	8682376	sense	1
c2	Hcv1.av93.c2.g1457.i1	8678662	8679341	Hcv1.av93.c2.g1456.i3	8677795	8682376	sense	1
c2	Hcv1.av93.c2.g1458.i1	8679370	8679974	Hcv1.av93.c2.g1456.i1	8677795	8682376	sense	1
c2	Hcv1.av93.c2.g1458.i1	8679370	8679974	Hcv1.av93.c2.g1456.i2	8677795	8682376	sense	1
c2	Hcv1.av93.c2.g1458.i1	8679370	8679974	Hcv1.av93.c2.g1456.i3	8677795	8682376	sense	1
c2	Hcv1.av93.c2.g1461.i1	8706208	8706945	Hcv1.av93.c2.g1460.i1	8704047	8707215	antisense	1
c2	Hcv1.av93.c2.g1461.i1	8706208	8706945	Hcv1.av93.c2.g1460.i2	8704047	8707215	antisense	1
c2	Hcv1.av93.c2.g1471.i1	8753183	8753605	Hcv1.av93.c2.g1470.i1	8753066	8771606	sense	1
c2	Hcv1.av93.c2.g1472.i1	8753666	8755112	Hcv1.av93.c2.g1470.i1	8753066	8771606	sense	1
c2	Hcv1.av93.c2.g1473.i1	8755217	8759270	Hcv1.av93.c2.g1470.i1	8753066	8771606	sense	13
c2	Hcv1.av93.c2.g1473.i2	8755217	8759270	Hcv1.av93.c2.g1470.i1	8753066	8771606	sense	14
c2	Hcv1.av93.c2.g1474.i1	8759530	8760054	Hcv1.av93.c2.g1470.i1	8753066	8771606	sense	1
c2	Hcv1.av93.c2.g1475.i1	8770097	8771411	Hcv1.av93.c2.g1470.i1	8753066	8771606	sense	1
c2	Hcv1.av93.c2.g1478.i1	8780097	8781486	Hcv1.av93.c2.g1477.i1	8778102	8782073	sense	2
c2	Hcv1.av93.c2.g1478.i1	8780097	8781486	Hcv1.av93.c2.g1477.i2	8778102	8782073	sense	2
c2	Hcv1.av93.c2.g1479.i1	8783652	8787041	Hcv1.av93.c2.g1477.i1	8782416	8787235	sense	2
c2	Hcv1.av93.c2.g1479.i1	8783652	8787041	Hcv1.av93.c2.g1477.i2	8782416	8787235	sense	2
c2	Hcv1.av93.c2.g148.i1	921004	925389	Hcv1.av93.c2.g144.i1	920614	925602	antisense	4
c2	Hcv1.av93.c2.g1482.i1	8792402	8794951	Hcv1.av93.c2.g1477.i1	8790050	8804718	antisense	5
c2	Hcv1.av93.c2.g1482.i1	8792402	8794951	Hcv1.av93.c2.g1480.i1	8790050	8804718	antisense	5
c2	Hcv1.av93.c2.g1489.i1	8842846	8844516	Hcv1.av93.c2.g1488.i1	8842374	8853924	antisense	2
c2	Hcv1.av93.c2.g1489.i1	8842846	8844516	Hcv1.av93.c2.g1488.i2	8842374	8853924	antisense	2
c2	Hcv1.av93.c2.g1489.i1	8842846	8844516	Hcv1.av93.c2.g1488.i3	8842071	8853924	antisense	2
c2	Hcv1.av93.c2.g1490.i1	8852060	8852455	Hcv1.av93.c2.g1488.i1	8842374	8853924	antisense	1
c2	Hcv1.av93.c2.g1490.i1	8852060	8852455	Hcv1.av93.c2.g1488.i2	8842374	8853924	antisense	1
c2	Hcv1.av93.c2.g1490.i1	8852060	8852455	Hcv1.av93.c2.g1488.i3	8842071	8853924	antisense	1
c2	Hcv1.av93.c2.g1491.i1	8855521	8856531	Hcv1.av93.c2.g1488.i1	8854693	8856741	sense	1
c2	Hcv1.av93.c2.g1491.i1	8855521	8856531	Hcv1.av93.c2.g1488.i2	8854693	8856741	sense	1
c2	Hcv1.av93.c2.g1491.i1	8855521	8856531	Hcv1.av93.c2.g1488.i3	8854693	8856741	sense	1
c2	Hcv1.av93.c2.g1491.i1	8855521	8856531	Hcv1.av93.c2.g1488.i4	8854693	8856741	sense	1
c2	Hcv1.av93.c2.g1493.i1	8867731	8870560	Hcv1.av93.c2.g1492.i1	8867604	8871141	antisense	2
c2	Hcv1.av93.c2.g1493.i1	8867731	8870560	Hcv1.av93.c2.g1492.i2	8867604	8871141	antisense	2
c2	Hcv1.av93.c2.g1493.i1	8867731	8870560	Hcv1.av93.c2.g1492.i3	8867604	8871141	antisense	2
c2	Hcv1.av93.c2.g1520.i1	8996511	9000300	Hcv1.av93.c2.g1519.i1	8995697	9008269	antisense	9
c2	Hcv1.av93.c2.g1520.i1	8996511	9000300	Hcv1.av93.c2.g1519.i2	8995697	9008269	antisense	9
c2	Hcv1.av93.c2.g1520.i2	8996661	9000300	Hcv1.av93.c2.g1519.i1	8995697	9008269	antisense	5
c2	Hcv1.av93.c2.g1520.i2	8996661	9000300	Hcv1.av93.c2.g1519.i2	8995697	9008269	antisense	5
c2	Hcv1.av93.c2.g1521.i1	9002288	9006062	Hcv1.av93.c2.g1519.i1	8995697	9008269	antisense	1
c2	Hcv1.av93.c2.g1521.i1	9002288	9006062	Hcv1.av93.c2.g1519.i2	8995697	9008269	antisense	1
c2	Hcv1.av93.c2.g1529.i1	9058940	9072551	Hcv1.av93.c2.g1528.i1	9052492	9072712	antisense	20
c2	Hcv1.av93.c2.g1529.i2	9058940	9072551	Hcv1.av93.c2.g1528.i1	9052492	9072712	antisense	19
c2	Hcv1.av93.c2.g1530.i1	9063854	9065737	Hcv1.av93.c2.g1528.i1	9052492	9072712	sense	2
c2	Hcv1.av93.c2.g1530.i1	9063854	9065737	Hcv1.av93.c2.g1529.i1	9063852	9068236	antisense	2
c2	Hcv1.av93.c2.g1530.i1	9063854	9065737	Hcv1.av93.c2.g1529.i2	9063852	9068236	antisense	2
c2	Hcv1.av93.c2.g1531.i1	9065724	9068066	Hcv1.av93.c2.g1528.i1	9052492	9072712	sense	2
c2	Hcv1.av93.c2.g1531.i1	9065724	9068066	Hcv1.av93.c2.g1529.i1	9063852	9068236	antisense	2
c2	Hcv1.av93.c2.g1531.i1	9065724	9068066	Hcv1.av93.c2.g1529.i2	9063852	9068236	antisense	2
c2	Hcv1.av93.c2.g1540.i1	9170287	9187659	Hcv1.av93.c2.g1539.i1	9169691	9188228	antisense	2
c2	Hcv1.av93.c2.g1540.i1	9170287	9187659	Hcv1.av93.c2.g1539.i2	9169691	9188228	antisense	2
c2	Hcv1.av93.c2.g1541.i1	9171223	9180040	Hcv1.av93.c2.g1539.i1	9169691	9188228	antisense	5
c2	Hcv1.av93.c2.g1541.i1	9171223	9180040	Hcv1.av93.c2.g1539.i2	9169691	9188228	antisense	5
c2	Hcv1.av93.c2.g1541.i1	9171223	9180040	Hcv1.av93.c2.g1540.i1	9171216	9184104	sense	5
c2	Hcv1.av93.c2.g1541.i2	9171223	9180040	Hcv1.av93.c2.g1539.i1	9169691	9188228	antisense	5
c2	Hcv1.av93.c2.g1541.i2	9171223	9180040	Hcv1.av93.c2.g1539.i2	9169691	9188228	antisense	5
c2	Hcv1.av93.c2.g1541.i2	9171223	9180040	Hcv1.av93.c2.g1540.i1	9171216	9184104	sense	5
c2	Hcv1.av93.c2.g1542.i1	9179050	9181586	Hcv1.av93.c2.g1539.i1	9169691	9188228	sense	4
c2	Hcv1.av93.c2.g1542.i1	9179050	9181586	Hcv1.av93.c2.g1539.i2	9169691	9188228	sense	4
c2	Hcv1.av93.c2.g1542.i1	9179050	9181586	Hcv1.av93.c2.g1540.i1	9171216	9184104	antisense	4
c2	Hcv1.av93.c2.g1551.i1	9243832	9247482	Hcv1.av93.c2.g1550.i1	9241356	9247752	antisense	5
c2	Hcv1.av93.c2.g1576.i1	9361305	9362789	Hcv1.av93.c2.g1575.i1	9360273	9362787	antisense	1
c2	Hcv1.av93.c2.g1582.i1	9374352	9375791	Hcv1.av93.c2.g1581.i1	9374024	9375926	antisense	3
c2	Hcv1.av93.c2.g1588.i1	9398824	9399880	Hcv1.av93.c2.g1587.i1	9394946	9400489	sense	1
c2	Hcv1.av93.c2.g1594.i1	9436966	9439298	Hcv1.av93.c2.g1593.i1	9436598	9439487	antisense	5
c2	Hcv1.av93.c2.g1594.i1	9436966	9439298	Hcv1.av93.c2.g1593.i2	9436598	9439487	antisense	5
c2	Hcv1.av93.c2.g1601.i1	9471064	9472834	Hcv1.av93.c2.g1600.i1	9470164	9474561	sense	1
c2	Hcv1.av93.c2.g1606.i1	9492527	9495821	Hcv1.av93.c2.g1605.i1	9492805	9498090	antisense	4
c2	Hcv1.av93.c2.g1606.i1	9492527	9495821	Hcv1.av93.c2.g1605.i2	9492805	9498090	antisense	4
c2	Hcv1.av93.c2.g1606.i1	9492527	9495821	Hcv1.av93.c2.g1605.i3	9492805	9498090	antisense	4
c2	Hcv1.av93.c2.g1606.i1	9492527	9495821	Hcv1.av93.c2.g1605.i4	9492805	9498090	antisense	4
c2	Hcv1.av93.c2.g1606.i1	9492527	9495821	Hcv1.av93.c2.g1605.i5	9492805	9498090	antisense	4
c2	Hcv1.av93.c2.g1635.i1	9605988	9607528	Hcv1.av93.c2.g1634.i1	9605996	9608034	antisense	1
c2	Hcv1.av93.c2.g1637.i1	9613764	9615492	Hcv1.av93.c2.g1636.i1	9609330	9615636	antisense	1
c2	Hcv1.av93.c2.g164.i1	976745	977876	Hcv1.av93.c2.g163.i1	976329	978317	antisense	1
c2	Hcv1.av93.c2.g1642.i1	9628499	9635319	Hcv1.av93.c2.g1641.i1	9628520	9638664	antisense	16
c2	Hcv1.av93.c2.g1645.i1	9650738	9651592	Hcv1.av93.c2.g1644.i2	9650592	9653657	sense	1
c2	Hcv1.av93.c2.g1661.i1	9732265	9739794	Hcv1.av93.c2.g1659.i1	9721135	9740223	antisense	3
c2	Hcv1.av93.c2.g1666.i1	9812897	9815434	Hcv1.av93.c2.g1665.i1	9809616	9825831	sense	1
c2	Hcv1.av93.c2.g1667.i1	9821423	9822100	Hcv1.av93.c2.g1665.i1	9809616	9825831	sense	1
c2	Hcv1.av93.c2.g1670.i1	9889723	9892065	Hcv1.av93.c2.g1669.i1	9880492	9893833	antisense	1
c2	Hcv1.av93.c2.g1671.i1	9921876	9922814	Hcv1.av93.c2.g1669.i1	9917091	9925531	sense	1
c2	Hcv1.av93.c2.g172.i1	1016061	1019496	Hcv1.av93.c2.g171.i1	1007119	1020324	sense	3
c2	Hcv1.av93.c2.g206.i1	1240083	1240584	Hcv1.av93.c2.g205.i1	1239636	1240948	sense	1
c2	Hcv1.av93.c2.g214.i1	1261817	1263095	Hcv1.av93.c2.g213.i1	1261807	1263781	sense	1
c2	Hcv1.av93.c2.g217.i1	1273551	1276985	Hcv1.av93.c2.g216.i1	1272155	1278165	sense	3
c2	Hcv1.av93.c2.g221.i1	1308224	1309388	Hcv1.av93.c2.g220.i1	1307146	1309459	antisense	2
c2	Hcv1.av93.c2.g221.i1	1308224	1309388	Hcv1.av93.c2.g220.i2	1307146	1309459	antisense	2
c2	Hcv1.av93.c2.g229.i1	1350034	1350955	Hcv1.av93.c2.g228.i1	1349951	1361534	sense	3
c2	Hcv1.av93.c2.g235.i1	1386756	1389062	Hcv1.av93.c2.g234.i1	1386606	1390492	antisense	2
c2	Hcv1.av93.c2.g252.i1	1501037	1503267	Hcv1.av93.c2.g251.i1	1500047	1505974	antisense	1
c2	Hcv1.av93.c2.g252.i1	1501037	1503267	Hcv1.av93.c2.g251.i2	1500047	1505974	antisense	1
c2	Hcv1.av93.c2.g264.i1	1595693	1596896	Hcv1.av93.c2.g263.i1	1595585	1598793	antisense	1
c2	Hcv1.av93.c2.g264.i1	1595693	1596896	Hcv1.av93.c2.g263.i2	1595585	1598793	antisense	1
c2	Hcv1.av93.c2.g265.i1	1597022	1598300	Hcv1.av93.c2.g263.i1	1595585	1598793	antisense	1
c2	Hcv1.av93.c2.g265.i1	1597022	1598300	Hcv1.av93.c2.g263.i2	1595585	1598793	antisense	1
c2	Hcv1.av93.c2.g271.i1	1633859	1634434	Hcv1.av93.c2.g270.i1	1633050	1635722	antisense	2
c2	Hcv1.av93.c2.g275.i1	1663210	1664718	Hcv1.av93.c2.g274.i1	1662748	1667119	sense	1
c2	Hcv1.av93.c2.g276.i1	1665872	1666992	Hcv1.av93.c2.g274.i1	1662748	1667119	sense	1
c2	Hcv1.av93.c2.g285.i1	1742696	1748502	Hcv1.av93.c2.g284.i1	1741717	1748579	antisense	2
c2	Hcv1.av93.c2.g285.i1	1742696	1748502	Hcv1.av93.c2.g284.i2	1741717	1748579	antisense	2
c2	Hcv1.av93.c2.g285.i1	1742696	1748502	Hcv1.av93.c2.g284.i3	1741717	1748579	antisense	2
c2	Hcv1.av93.c2.g285.i1	1742696	1748502	Hcv1.av93.c2.g284.i4	1741717	1748579	antisense	2
c2	Hcv1.av93.c2.g307.i1	1852146	1854495	Hcv1.av93.c2.g306.i1	1851938	1854890	sense	1
c2	Hcv1.av93.c2.g311.i1	1873642	1874339	Hcv1.av93.c2.g310.i1	1873641	1878579	antisense	2
c2	Hcv1.av93.c2.g315.i1	1911478	1912608	Hcv1.av93.c2.g314.i1	1910062	1916247	sense	1
c2	Hcv1.av93.c2.g325.i1	1972618	1973822	Hcv1.av93.c2.g324.i1	1965033	1975992	sense	1
c2	Hcv1.av93.c2.g326.i1	1980474	1981829	Hcv1.av93.c2.g324.i1	1980493	1984235	antisense	1
c2	Hcv1.av93.c2.g346.i1	2090087	2090445	Hcv1.av93.c2.g345.i1	2088109	2096177	antisense	2
c2	Hcv1.av93.c2.g346.i1	2090087	2090445	Hcv1.av93.c2.g345.i2	2088109	2096177	antisense	2
c2	Hcv1.av93.c2.g346.i1	2090087	2090445	Hcv1.av93.c2.g345.i3	2088109	2096177	antisense	2
c2	Hcv1.av93.c2.g354.i1	2155743	2156207	Hcv1.av93.c2.g353.i1	2155512	2159497	sense	1
c2	Hcv1.av93.c2.g362.i1	2204205	2205205	Hcv1.av93.c2.g360.i1	2196175	2205754	sense	1
c2	Hcv1.av93.c2.g375.i1	2259576	2261614	Hcv1.av93.c2.g374.i1	2258755	2261727	antisense	5
c2	Hcv1.av93.c2.g376.i1	2265351	2266984	Hcv1.av93.c2.g374.i1	2264616	2270144	sense	1
c2	Hcv1.av93.c2.g381.i1	2303384	2304404	Hcv1.av93.c2.g380.i1	2301214	2305259	antisense	2
c2	Hcv1.av93.c2.g381.i1	2303384	2304404	Hcv1.av93.c2.g380.i2	2301214	2305259	antisense	2
c2	Hcv1.av93.c2.g384.i1	2327615	2328953	Hcv1.av93.c2.g383.i1	2327269	2329217	sense	1
c2	Hcv1.av93.c2.g384.i1	2327615	2328953	Hcv1.av93.c2.g383.i2	2327269	2329217	sense	1
c2	Hcv1.av93.c2.g399.i1	2378038	2379222	Hcv1.av93.c2.g398.i2	2377957	2379987	sense	1
c2	Hcv1.av93.c2.g407.i1	2411675	2412122	Hcv1.av93.c2.g406.i1	2410575	2412186	antisense	1
c2	Hcv1.av93.c2.g413.i1	2428199	2431130	Hcv1.av93.c2.g412.i1	2427843	2430914	antisense	2
c2	Hcv1.av93.c2.g42.i1	335152	338103	Hcv1.av93.c2.g41.i1	335106	339208	antisense	3
c2	Hcv1.av93.c2.g445.i1	2665906	2666822	Hcv1.av93.c2.g444.i2	2664649	2670735	antisense	1
c2	Hcv1.av93.c2.g446.i1	2667547	2670194	Hcv1.av93.c2.g444.i2	2664649	2670735	antisense	2
c2	Hcv1.av93.c2.g452.i1	2687187	2687541	Hcv1.av93.c2.g451.i1	2687132	2689150	antisense	1
c2	Hcv1.av93.c2.g46.i1	364167	364866	Hcv1.av93.c2.g45.i1	363946	367434	antisense	1
c2	Hcv1.av93.c2.g499.i1	2963256	2965018	Hcv1.av93.c2.g498.i1	2962846	2968721	antisense	2
c2	Hcv1.av93.c2.g50.i1	380315	381612	Hcv1.av93.c2.g49.i1	379509	383539	sense	1
c2	Hcv1.av93.c2.g50.i1	380315	381612	Hcv1.av93.c2.g49.i2	379509	383539	sense	1
c2	Hcv1.av93.c2.g500.i1	2965053	2966885	Hcv1.av93.c2.g498.i1	2962846	2968721	antisense	2
c2	Hcv1.av93.c2.g503.i1	2979199	2982706	Hcv1.av93.c2.g502.i1	2974750	2991448	sense	2
c2	Hcv1.av93.c2.g504.i1	2985038	2985342	Hcv1.av93.c2.g502.i1	2974750	2991448	sense	1
c2	Hcv1.av93.c2.g505.i1	2986687	2991114	Hcv1.av93.c2.g502.i1	2974750	2991448	sense	4
c2	Hcv1.av93.c2.g507.i1	3001959	3007484	Hcv1.av93.c2.g506.i1	3001634	3007361	antisense	9
c2	Hcv1.av93.c2.g526.i1	3135033	3135805	Hcv1.av93.c2.g525.i3	3134901	3136912	sense	1
c2	Hcv1.av93.c2.g530.i1	3161011	3162383	Hcv1.av93.c2.g528.i1	3160382	3178011	antisense	2
c2	Hcv1.av93.c2.g530.i1	3161011	3162383	Hcv1.av93.c2.g528.i2	3160382	3178011	antisense	2
c2	Hcv1.av93.c2.g530.i1	3161011	3162383	Hcv1.av93.c2.g529.i1	3160382	3178011	antisense	2
c2	Hcv1.av93.c2.g548.i1	3264641	3267411	Hcv1.av93.c2.g547.i1	3261229	3269142	sense	2
c2	Hcv1.av93.c2.g548.i1	3264641	3267411	Hcv1.av93.c2.g547.i2	3261229	3269142	sense	2
c2	Hcv1.av93.c2.g548.i2	3264641	3267411	Hcv1.av93.c2.g547.i1	3261229	3269142	sense	4
c2	Hcv1.av93.c2.g548.i2	3264641	3267411	Hcv1.av93.c2.g547.i2	3261229	3269142	sense	4
c2	Hcv1.av93.c2.g555.i1	3291817	3293955	Hcv1.av93.c2.g553.i1	3289561	3296186	sense	1
c2	Hcv1.av93.c2.g556.i1	3294188	3295831	Hcv1.av93.c2.g553.i1	3289561	3296186	sense	1
c2	Hcv1.av93.c2.g573.i1	3404293	3414991	Hcv1.av93.c2.g572.i1	3402188	3418157	antisense	19
c2	Hcv1.av93.c2.g573.i1	3404293	3414991	Hcv1.av93.c2.g572.i2	3402188	3419237	antisense	19
c2	Hcv1.av93.c2.g574.i1	3414798	3419114	Hcv1.av93.c2.g572.i2	3402188	3419237	antisense	11
c2	Hcv1.av93.c2.g580.i1	3449628	3451054	Hcv1.av93.c2.g579.i1	3449430	3451801	antisense	3
c2	Hcv1.av93.c2.g581.i1	3455775	3456862	Hcv1.av93.c2.g579.i1	3452306	3457227	antisense	1
c2	Hcv1.av93.c2.g591.i1	3482938	3484127	Hcv1.av93.c2.g590.i1	3482398	3484402	antisense	2
c2	Hcv1.av93.c2.g595.i1	3533748	3534957	Hcv1.av93.c2.g594.i1	3533522	3534929	antisense	4
c2	Hcv1.av93.c2.g631.i1	3711015	3717018	Hcv1.av93.c2.g629.i1	3709633	3718780	sense	2
c2	Hcv1.av93.c2.g631.i1	3711015	3717018	Hcv1.av93.c2.g630.i1	3709633	3718784	sense	2
c2	Hcv1.av93.c2.g636.i2	3740503	3746146	Hcv1.av93.c2.g636.i1	3735592	3750163	sense	16
c2	Hcv1.av93.c2.g637.i1	3739176	3739894	Hcv1.av93.c2.g636.i1	3735592	3750163	antisense	1
c2	Hcv1.av93.c2.g638.i1	3746153	3747667	Hcv1.av93.c2.g636.i1	3735592	3750163	antisense	3
c2	Hcv1.av93.c2.g638.i1	3746153	3747667	Hcv1.av93.c2.g636.i3	3741305	3750163	antisense	3
c2	Hcv1.av93.c2.g653.i1	3884114	3885039	Hcv1.av93.c2.g652.i1	3883942	3885204	antisense	1
c2	Hcv1.av93.c2.g653.i1	3884114	3885039	Hcv1.av93.c2.g652.i2	3883942	3885204	antisense	1
c2	Hcv1.av93.c2.g664.i1	3977471	3978100	Hcv1.av93.c2.g663.i1	3977450	3978257	sense	1
c2	Hcv1.av93.c2.g678.i1	4049053	4051977	Hcv1.av93.c2.g677.i1	4048026	4052081	antisense	6
c2	Hcv1.av93.c2.g680.i1	4056484	4057940	Hcv1.av93.c2.g679.i1	4056173	4060824	sense	1
c2	Hcv1.av93.c2.g692.i1	4131930	4133592	Hcv1.av93.c2.g691.i1	4131222	4133736	antisense	1
c2	Hcv1.av93.c2.g693.i1	4137986	4141284	Hcv1.av93.c2.g691.i1	4136555	4141038	antisense	4
c2	Hcv1.av93.c2.g698.i1	4160747	4162223	Hcv1.av93.c2.g697.i1	4157634	4164933	antisense	1
c2	Hcv1.av93.c2.g707.i1	4231618	4232483	Hcv1.av93.c2.g706.i1	4223737	4237404	sense	1
c2	Hcv1.av93.c2.g71.i1	484333	485179	Hcv1.av93.c2.g70.i1	484181	485643	antisense	3
c2	Hcv1.av93.c2.g711.i1	4259556	4259741	Hcv1.av93.c2.g710.i1	4258939	4261129	sense	1
c2	Hcv1.av93.c2.g711.i1	4259556	4259741	Hcv1.av93.c2.g710.i2	4258939	4261129	sense	1
c2	Hcv1.av93.c2.g717.i1	4276491	4282364	Hcv1.av93.c2.g716.i1	4276200	4282187	antisense	15
c2	Hcv1.av93.c2.g732.i1	4328892	4333444	Hcv1.av93.c2.g731.i1	4328088	4333494	antisense	1
c2	Hcv1.av93.c2.g751.i1	4439239	4441465	Hcv1.av93.c2.g750.i1	4439082	4442646	sense	1
c2	Hcv1.av93.c2.g753.i1	4457101	4457549	Hcv1.av93.c2.g752.i1	4449503	4458882	antisense	1
c2	Hcv1.av93.c2.g775.i1	4598362	4599904	Hcv1.av93.c2.g774.i1	4598208	4601730	sense	2
c2	Hcv1.av93.c2.g779.i1	4613299	4614648	Hcv1.av93.c2.g778.i1	4612156	4615568	sense	1
c2	Hcv1.av93.c2.g779.i1	4613299	4614648	Hcv1.av93.c2.g778.i2	4612156	4615568	sense	1
c2	Hcv1.av93.c2.g78.i1	522136	522862	Hcv1.av93.c2.g77.i1	521551	523621	sense	1
c2	Hcv1.av93.c2.g78.i1	522136	522862	Hcv1.av93.c2.g77.i2	521551	525857	sense	1
c2	Hcv1.av93.c2.g782.i1	4641046	4642235	Hcv1.av93.c2.g780.i1	4639666	4642812	antisense	1
c2	Hcv1.av93.c2.g800.i1	4740834	4741773	Hcv1.av93.c2.g799.i1	4739680	4743516	sense	1
c2	Hcv1.av93.c2.g806.i1	4775859	4777599	Hcv1.av93.c2.g805.i1	4773536	4777828	antisense	2
c2	Hcv1.av93.c2.g806.i1	4775859	4777599	Hcv1.av93.c2.g805.i2	4773536	4777828	antisense	2
c2	Hcv1.av93.c2.g806.i1	4775859	4777599	Hcv1.av93.c2.g805.i3	4773536	4777828	antisense	2
c2	Hcv1.av93.c2.g806.i1	4775859	4777599	Hcv1.av93.c2.g805.i4	4773536	4777828	antisense	2
c2	Hcv1.av93.c2.g807.i1	4785990	4787201	Hcv1.av93.c2.g805.i4	4784978	4794693	sense	1
c2	Hcv1.av93.c2.g808.i1	4787923	4792502	Hcv1.av93.c2.g805.i4	4784978	4794693	antisense	3
c2	Hcv1.av93.c2.g808.i2	4787923	4789379	Hcv1.av93.c2.g805.i4	4784978	4794693	antisense	2
c2	Hcv1.av93.c2.g809.i1	4790576	4791393	Hcv1.av93.c2.g805.i4	4784978	4794693	sense	3
c2	Hcv1.av93.c2.g809.i1	4790576	4791393	Hcv1.av93.c2.g808.i1	4789147	4791749	antisense	3
c2	Hcv1.av93.c2.g825.i1	4916947	4918276	Hcv1.av93.c2.g824.i1	4915891	4918514	antisense	2
c2	Hcv1.av93.c2.g84.i1	549304	549944	Hcv1.av93.c2.g83.i1	547304	549973	sense	1
c2	Hcv1.av93.c2.g857.i1	5050758	5051674	Hcv1.av93.c2.g853.i1	5048911	5058145	sense	1
c2	Hcv1.av93.c2.g857.i1	5050758	5051674	Hcv1.av93.c2.g853.i2	5048911	5051749	sense	1
c2	Hcv1.av93.c2.g858.i1	5070311	5071871	Hcv1.av93.c2.g853.i1	5067070	5075007	antisense	1
c2	Hcv1.av93.c2.g858.i1	5070311	5071871	Hcv1.av93.c2.g853.i3	5067070	5075007	antisense	1
c2	Hcv1.av93.c2.g87.i1	570145	571973	Hcv1.av93.c2.g86.i1	568559	572440	sense	4
c2	Hcv1.av93.c2.g88.i1	576329	577069	Hcv1.av93.c2.g86.i1	574741	577062	antisense	1
c2	Hcv1.av93.c2.g881.i1	5198837	5199618	Hcv1.av93.c2.g880.i1	5198130	5206609	sense	1
c2	Hcv1.av93.c2.g881.i1	5198837	5199618	Hcv1.av93.c2.g880.i2	5198130	5206609	sense	1
c2	Hcv1.av93.c2.g881.i1	5198837	5199618	Hcv1.av93.c2.g880.i3	5198130	5206609	sense	1
c2	Hcv1.av93.c2.g882.i1	5201176	5206134	Hcv1.av93.c2.g880.i1	5198130	5206609	antisense	2
c2	Hcv1.av93.c2.g882.i1	5201176	5206134	Hcv1.av93.c2.g880.i2	5198130	5206609	antisense	2
c2	Hcv1.av93.c2.g882.i1	5201176	5206134	Hcv1.av93.c2.g880.i3	5198130	5206609	antisense	2
c2	Hcv1.av93.c2.g891.i1	5258587	5261157	Hcv1.av93.c2.g890.i1	5256555	5266018	antisense	1
c2	Hcv1.av93.c2.g891.i1	5258587	5261157	Hcv1.av93.c2.g890.i2	5256555	5269983	antisense	1
c2	Hcv1.av93.c2.g897.i1	5305956	5306852	Hcv1.av93.c2.g896.i1	5305014	5307111	antisense	1
c2	Hcv1.av93.c2.g9.i1	44788	46062	Hcv1.av93.c2.g8.i1	44252	46302	sense	1
c2	Hcv1.av93.c2.g915.i1	5456240	5462684	Hcv1.av93.c2.g914.i1	5449278	5462023	antisense	7
c2	Hcv1.av93.c2.g915.i2	5456240	5462684	Hcv1.av93.c2.g914.i1	5449278	5462023	antisense	6
c2	Hcv1.av93.c2.g940.i1	5618227	5620420	Hcv1.av93.c2.g939.i2	5615889	5620428	sense	1
c2	Hcv1.av93.c2.g940.i1	5618227	5620420	Hcv1.av93.c2.g939.i3	5615889	5620428	sense	1
c2	Hcv1.av93.c2.g940.i1	5618227	5620420	Hcv1.av93.c2.g939.i4	5615889	5620428	sense	1
c2	Hcv1.av93.c2.g96.i1	646952	653873	Hcv1.av93.c2.g95.i2	646142	654275	antisense	10
c2	Hcv1.av93.c2.g965.i1	5754330	5756840	Hcv1.av93.c2.g964.i2	5754358	5757692	antisense	8
c2	Hcv1.av93.c2.g98.i1	660556	662577	Hcv1.av93.c2.g97.i1	660366	668026	antisense	2
c2	Hcv1.av93.c2.g984.i1	5865112	5866473	Hcv1.av93.c2.g983.i1	5864187	5866970	antisense	1
c2	Hcv1.av93.c2.g984.i1	5865112	5866473	Hcv1.av93.c2.g983.i2	5864187	5866970	antisense	1
c3	Hcv1.av93.c3.g1003.i1	6850836	6859105	Hcv1.av93.c3.g1002.i1	6850319	6862646	sense	2
c3	Hcv1.av93.c3.g1014.i1	6957297	6957875	Hcv1.av93.c3.g1013.i1	6957094	6961929	sense	1
c3	Hcv1.av93.c3.g1014.i1	6957297	6957875	Hcv1.av93.c3.g1013.i2	6957094	6961929	sense	1
c3	Hcv1.av93.c3.g1014.i1	6957297	6957875	Hcv1.av93.c3.g1013.i3	6957094	6961929	sense	1
c3	Hcv1.av93.c3.g1017.i1	6975937	6977194	Hcv1.av93.c3.g1016.i1	6975442	6980032	antisense	3
c3	Hcv1.av93.c3.g1017.i1	6975937	6977194	Hcv1.av93.c3.g1016.i2	6975442	6980032	antisense	3
c3	Hcv1.av93.c3.g1017.i1	6975937	6977194	Hcv1.av93.c3.g1016.i3	6975442	6980032	antisense	3
c3	Hcv1.av93.c3.g1022.i1	7009759	7012699	Hcv1.av93.c3.g1021.i1	7008572	7013820	antisense	1
c3	Hcv1.av93.c3.g1022.i1	7009759	7012699	Hcv1.av93.c3.g1021.i2	7008572	7013820	antisense	1
c3	Hcv1.av93.c3.g1023.i1	7012743	7013262	Hcv1.av93.c3.g1021.i1	7008572	7013820	antisense	1
c3	Hcv1.av93.c3.g1023.i1	7012743	7013262	Hcv1.av93.c3.g1021.i2	7008572	7013820	antisense	1
c3	Hcv1.av93.c3.g1028.i1	7060651	7073333	Hcv1.av93.c3.g1027.i2	7057027	7072859	antisense	13
[truncated: 2,361 more rows]

## Sheet: AnnotationInfo
index	gene	scaffold	number	added_in_isoseq	added_in_augustus	added_in_pleurobrachia	protein_coding	not_in_mnemi_pleuro	horm_had_nr_hit_gt_1e-5
0	Hcv1.av93.c1.g1	c1	1	0	1	0	1	0	0
1	Hcv1.av93.c1.g2	c1	2	1	0	0	1	0	0
2	Hcv1.av93.c1.g3	c1	3	1	0	0	1	0	0
3	Hcv1.av93.c1.g4	c1	4	1	0	0	1	0	0
4	Hcv1.av93.c1.g5	c1	5	1	0	0	1	0	0
5	Hcv1.av93.c1.g6	c1	6	1	0	0	1	0	0
6	Hcv1.av93.c1.g7	c1	7	1	0	0	1	0	1
7	Hcv1.av93.c1.g8	c1	8	1	0	0	0	0	0
8	Hcv1.av93.c1.g9	c1	9	1	0	0	1	0	0
9	Hcv1.av93.c1.g10	c1	10	0	1	0	1	0	1
10	Hcv1.av93.c1.g11	c1	11	1	0	0	1	0	0
11	Hcv1.av93.c1.g12	c1	12	1	0	0	1	0	0
12	Hcv1.av93.c1.g13	c1	13	0	1	0	1	0	0
13	Hcv1.av93.c1.g14	c1	14	1	0	0	1	0	1
14	Hcv1.av93.c1.g15	c1	15	1	0	0	1	0	0
15	Hcv1.av93.c1.g16	c1	16	1	0	0	1	0	0
16	Hcv1.av93.c1.g17	c1	17	1	0	0	1	0	1
17	Hcv1.av93.c1.g18	c1	18	1	0	0	1	0	0
18	Hcv1.av93.c1.g19	c1	19	1	0	0	1	0	0
19	Hcv1.av93.c1.g20	c1	20	1	0	0	1	0	1
20	Hcv1.av93.c1.g21	c1	21	1	0	0	1	0	0
21	Hcv1.av93.c1.g22	c1	22	1	0	0	1	0	0
22	Hcv1.av93.c1.g23	c1	23	1	0	0	1	0	1
23	Hcv1.av93.c1.g24	c1	24	1	0	0	1	0	0
24	Hcv1.av93.c1.g25	c1	25	1	0	0	1	0	0
25	Hcv1.av93.c1.g26	c1	26	1	0	0	1	0	1
26	Hcv1.av93.c1.g27	c1	27	1	0	0	1	0	1
27	Hcv1.av93.c1.g28	c1	28	1	0	0	1	0	1
28	Hcv1.av93.c1.g29	c1	29	1	0	0	1	0	1
29	Hcv1.av93.c1.g30	c1	30	1	0	0	1	0	1
30	Hcv1.av93.c1.g31	c1	31	1	0	0	1	0	0
31	Hcv1.av93.c1.g32	c1	32	1	0	0	1	0	1
32	Hcv1.av93.c1.g33	c1	33	1	0	0	0	0	0
33	Hcv1.av93.c1.g34	c1	34	1	0	0	1	0	1
34	Hcv1.av93.c1.g35	c1	35	1	0	0	1	0	1
35	Hcv1.av93.c1.g36	c1	36	1	0	0	0	0	0
36	Hcv1.av93.c1.g37	c1	37	1	0	0	1	0	1
37	Hcv1.av93.c1.g38	c1	38	1	0	0	1	0	1
38	Hcv1.av93.c1.g39	c1	39	1	0	0	1	0	1
39	Hcv1.av93.c1.g40	c1	40	1	0	0	1	0	1
40	Hcv1.av93.c1.g41	c1	41	1	0	0	0	0	0
41	Hcv1.av93.c1.g42	c1	42	1	0	0	1	0	0
42	Hcv1.av93.c1.g43	c1	43	1	0	0	1	0	0
43	Hcv1.av93.c1.g44	c1	44	1	0	0	1	0	1
44	Hcv1.av93.c1.g45	c1	45	0	1	0	1	0	1
45	Hcv1.av93.c1.g46	c1	46	1	0	0	1	0	1
46	Hcv1.av93.c1.g47	c1	47	1	0	0	1	0	1
47	Hcv1.av93.c1.g48	c1	48	1	0	0	1	0	1
48	Hcv1.av93.c1.g49	c1	49	1	0	0	1	0	0
49	Hcv1.av93.c1.g50	c1	50	1	0	0	1	1	1
50	Hcv1.av93.c1.g51	c1	51	1	0	0	1	1	1
51	Hcv1.av93.c1.g52	c1	52	1	0	0	1	0	0
52	Hcv1.av93.c1.g53	c1	53	1	0	0	1	0	1
53	Hcv1.av93.c1.g54	c1	54	1	0	0	1	0	0
54	Hcv1.av93.c1.g55	c1	55	1	0	0	1	0	1
55	Hcv1.av93.c1.g56	c1	56	1	0	0	1	0	1
56	Hcv1.av93.c1.g57	c1	57	0	1	0	1	0	0
57	Hcv1.av93.c1.g58	c1	58	1	0	0	0	0	0
58	Hcv1.av93.c1.g59	c1	59	1	0	0	1	0	1
59	Hcv1.av93.c1.g60	c1	60	1	0	0	1	0	0
60	Hcv1.av93.c1.g61	c1	61	1	0	0	1	0	1
61	Hcv1.av93.c1.g62	c1	62	1	0	0	1	0	1
62	Hcv1.av93.c1.g63	c1	63	1	0	0	1	0	1
63	Hcv1.av93.c1.g64	c1	64	1	0	0	1	0	1
64	Hcv1.av93.c1.g65	c1	65	1	0	0	1	0	1
65	Hcv1.av93.c1.g66	c1	66	1	0	0	1	0	0
66	Hcv1.av93.c1.g67	c1	67	1	0	0	1	0	0
67	Hcv1.av93.c1.g68	c1	68	1	0	0	1	0	1
68	Hcv1.av93.c1.g69	c1	69	1	0	0	1	0	0
69	Hcv1.av93.c1.g70	c1	70	0	0	1	1	1	0
70	Hcv1.av93.c1.g71	c1	71	1	0	0	0	0	0
71	Hcv1.av93.c1.g72	c1	72	0	1	0	0	0	0
72	Hcv1.av93.c1.g73	c1	73	1	0	0	1	0	0
73	Hcv1.av93.c1.g74	c1	74	1	0	0	1	0	1
74	Hcv1.av93.c1.g75	c1	75	1	0	0	1	0	0
75	Hcv1.av93.c1.g76	c1	76	1	0	0	0	0	0
76	Hcv1.av93.c1.g77	c1	77	1	0	0	1	0	1
77	Hcv1.av93.c1.g78	c1	78	1	0	0	1	0	1
78	Hcv1.av93.c1.g79	c1	79	1	0	0	1	0	1
79	Hcv1.av93.c1.g80	c1	80	1	0	0	1	0	0
80	Hcv1.av93.c1.g81	c1	81	1	0	0	1	0	1
81	Hcv1.av93.c1.g82	c1	82	1	0	0	1	0	1
82	Hcv1.av93.c1.g83	c1	83	1	0	0	1	0	1
83	Hcv1.av93.c1.g84	c1	84	1	0	0	1	0	0
84	Hcv1.av93.c1.g85	c1	85	1	0	0	1	0	0
85	Hcv1.av93.c1.g86	c1	86	1	0	0	1	0	0
86	Hcv1.av93.c1.g87	c1	87	1	0	0	1	0	1
87	Hcv1.av93.c1.g88	c1	88	1	0	0	1	0	1
88	Hcv1.av93.c1.g89	c1	89	1	0	0	1	0	0
89	Hcv1.av93.c1.g90	c1	90	1	0	0	1	0	0
90	Hcv1.av93.c1.g91	c1	91	1	0	0	1	0	1
91	Hcv1.av93.c1.g92	c1	92	1	0	0	1	0	0
92	Hcv1.av93.c1.g93	c1	93	1	0	0	1	0	0
93	Hcv1.av93.c1.g94	c1	94	1	0	0	1	0	0
94	Hcv1.av93.c1.g95	c1	95	1	0	0	1	0	0
95	Hcv1.av93.c1.g96	c1	96	1	0	0	1	0	0
96	Hcv1.av93.c1.g97	c1	97	1	0	0	1	0	1
97	Hcv1.av93.c1.g98	c1	98	1	0	0	1	1	0
98	Hcv1.av93.c1.g99	c1	99	1	0	0	1	0	1
99	Hcv1.av93.c1.g100	c1	100	1	0	0	1	0	0
100	Hcv1.av93.c1.g101	c1	101	1	0	0	1	0	1
101	Hcv1.av93.c1.g102	c1	102	1	0	0	1	0	0
102	Hcv1.av93.c1.g103	c1	103	1	0	0	1	0	0
103	Hcv1.av93.c1.g104	c1	104	1	0	0	1	0	0
104	Hcv1.av93.c1.g105	c1	105	1	0	0	1	0	0
105	Hcv1.av93.c1.g106	c1	106	1	0	0	1	0	1
106	Hcv1.av93.c1.g107	c1	107	1	0	0	1	0	1
107	Hcv1.av93.c1.g108	c1	108	1	0	0	1	0	1
108	Hcv1.av93.c1.g109	c1	109	1	0	0	1	0	1
109	Hcv1.av93.c1.g110	c1	110	1	0	0	1	0	1
110	Hcv1.av93.c1.g111	c1	111	1	0	0	1	0	1
111	Hcv1.av93.c1.g112	c1	112	1	0	0	1	0	0
112	Hcv1.av93.c1.g113	c1	113	1	0	0	1	0	1
113	Hcv1.av93.c1.g114	c1	114	0	1	0	1	0	0
114	Hcv1.av93.c1.g115	c1	115	1	0	0	1	0	1
115	Hcv1.av93.c1.g116	c1	116	1	0	0	1	0	0
116	Hcv1.av93.c1.g117	c1	117	1	0	0	1	0	1
117	Hcv1.av93.c1.g118	c1	118	1	0	0	1	0	1
118	Hcv1.av93.c1.g119	c1	119	0	1	0	1	0	1
119	Hcv1.av93.c1.g120	c1	120	1	0	0	1	0	1
120	Hcv1.av93.c1.g121	c1	121	1	0	0	1	0	1
121	Hcv1.av93.c1.g122	c1	122	1	0	0	1	0	1
122	Hcv1.av93.c1.g123	c1	123	1	0	0	1	0	1
123	Hcv1.av93.c1.g124	c1	124	0	1	0	1	0	0
124	Hcv1.av93.c1.g125	c1	125	1	0	0	1	0	0
125	Hcv1.av93.c1.g126	c1	126	1	0	0	1	0	1
126	Hcv1.av93.c1.g127	c1	127	1	0	0	1	0	1
127	Hcv1.av93.c1.g128	c1	128	1	0	0	1	0	1
128	Hcv1.av93.c1.g129	c1	129	1	0	0	1	0	1
129	Hcv1.av93.c1.g130	c1	130	1	0	0	1	0	1
130	Hcv1.av93.c1.g131	c1	131	1	0	0	1	0	1
131	Hcv1.av93.c1.g132	c1	132	1	0	0	1	0	0
132	Hcv1.av93.c1.g133	c1	133	1	0	0	1	0	0
133	Hcv1.av93.c1.g134	c1	134	1	0	0	1	0	0
134	Hcv1.av93.c1.g135	c1	135	1	0	0	1	0	0
135	Hcv1.av93.c1.g136	c1	136	1	0	0	1	0	0
136	Hcv1.av93.c1.g137	c1	137	0	1	0	1	0	0
137	Hcv1.av93.c1.g138	c1	138	1	0	0	1	0	1
138	Hcv1.av93.c1.g139	c1	139	0	0	1	1	0	0
139	Hcv1.av93.c1.g140	c1	140	1	0	0	1	0	0
140	Hcv1.av93.c1.g141	c1	141	1	0	0	1	0	1
141	Hcv1.av93.c1.g142	c1	142	1	0	0	1	0	0
142	Hcv1.av93.c1.g143	c1	143	1	0	0	1	0	1
143	Hcv1.av93.c1.g144	c1	144	1	0	0	1	0	1
144	Hcv1.av93.c1.g145	c1	145	1	0	0	1	0	0
145	Hcv1.av93.c1.g146	c1	146	1	0	0	1	0	1
146	Hcv1.av93.c1.g147	c1	147	1	0	0	1	0	0
147	Hcv1.av93.c1.g148	c1	148	1	0	0	1	0	1
148	Hcv1.av93.c1.g149	c1	149	1	0	0	1	0	1
149	Hcv1.av93.c1.g150	c1	150	1	0	0	1	0	1
150	Hcv1.av93.c1.g151	c1	151	0	0	1	1	0	0
151	Hcv1.av93.c1.g152	c1	152	0	1	0	1	0	0
152	Hcv1.av93.c1.g153	c1	153	1	0	0	1	0	1
153	Hcv1.av93.c1.g154	c1	154	1	0	0	1	0	1
154	Hcv1.av93.c1.g155	c1	155	1	0	0	1	0	1
155	Hcv1.av93.c1.g156	c1	156	0	1	0	1	0	1
156	Hcv1.av93.c1.g157	c1	157	1	0	0	1	0	1
157	Hcv1.av93.c1.g158	c1	158	1	0	0	1	0	1
158	Hcv1.av93.c1.g159	c1	159	1	0	0	1	0	1
159	Hcv1.av93.c1.g160	c1	160	1	0	0	1	0	1
160	Hcv1.av93.c1.g161	c1	161	1	0	0	1	0	1
161	Hcv1.av93.c1.g162	c1	162	1	0	0	0	0	0
162	Hcv1.av93.c1.g163	c1	163	1	0	0	1	0	1
163	Hcv1.av93.c1.g164	c1	164	1	0	0	1	0	1
164	Hcv1.av93.c1.g165	c1	165	1	0	0	1	1	0
165	Hcv1.av93.c1.g166	c1	166	0	1	0	1	0	1
166	Hcv1.av93.c1.g167	c1	167	1	0	0	1	0	1
167	Hcv1.av93.c1.g168	c1	168	1	0	0	1	0	1
168	Hcv1.av93.c1.g169	c1	169	1	0	0	1	0	1
169	Hcv1.av93.c1.g170	c1	170	0	1	0	1	0	0
170	Hcv1.av93.c1.g171	c1	171	1	0	0	1	0	1
171	Hcv1.av93.c1.g172	c1	172	1	0	0	1	0	0
172	Hcv1.av93.c1.g173	c1	173	0	0	1	1	0	1
173	Hcv1.av93.c1.g174	c1	174	1	0	0	0	0	0
174	Hcv1.av93.c1.g175	c1	175	1	0	0	1	0	1
175	Hcv1.av93.c1.g176	c1	176	1	0	0	1	0	1
176	Hcv1.av93.c1.g177	c1	177	1	0	0	1	0	1
177	Hcv1.av93.c1.g178	c1	178	0	1	0	1	0	1
178	Hcv1.av93.c1.g179	c1	179	1	0	0	1	0	1
179	Hcv1.av93.c1.g180	c1	180	1	0	0	1	0	1
180	Hcv1.av93.c1.g181	c1	181	1	0	0	1	0	0
181	Hcv1.av93.c1.g182	c1	182	1	0	0	1	0	1
182	Hcv1.av93.c1.g183	c1	183	1	0	0	1	1	0
183	Hcv1.av93.c1.g184	c1	184	1	0	0	1	0	1
184	Hcv1.av93.c1.g185	c1	185	1	0	0	1	1	0
185	Hcv1.av93.c1.g186	c1	186	1	0	0	1	0	0
186	Hcv1.av93.c1.g187	c1	187	1	0	0	1	0	0
187	Hcv1.av93.c1.g188	c1	188	1	0	0	1	0	0
188	Hcv1.av93.c1.g189	c1	189	1	0	0	1	0	0
189	Hcv1.av93.c1.g190	c1	190	1	0	0	1	0	0
190	Hcv1.av93.c1.g191	c1	191	1	0	0	1	0	1
191	Hcv1.av93.c1.g192	c1	192	1	0	0	1	0	1
192	Hcv1.av93.c1.g193	c1	193	1	0	0	1	0	1
193	Hcv1.av93.c1.g194	c1	194	1	0	0	1	0	0
194	Hcv1.av93.c1.g195	c1	195	1	0	0	1	0	0
195	Hcv1.av93.c1.g196	c1	196	1	0	0	1	0	0
196	Hcv1.av93.c1.g197	c1	197	1	0	0	1	0	0
197	Hcv1.av93.c1.g198	c1	198	1	0	0	1	0	0
198	Hcv1.av93.c1.g199	c1	199	1	0	0	1	0	0
199	Hcv1.av93.c1.g200	c1	200	1	0	0	1	0	1
200	Hcv1.av93.c1.g201	c1	201	1	0	0	1	0	0
201	Hcv1.av93.c1.g202	c1	202	1	0	0	1	0	1
202	Hcv1.av93.c1.g203	c1	203	1	0	0	1	0	1
203	Hcv1.av93.c1.g204	c1	204	1	0	0	1	0	1
204	Hcv1.av93.c1.g205	c1	205	1	0	0	1	0	1
205	Hcv1.av93.c1.g206	c1	206	1	0	0	1	0	1
206	Hcv1.av93.c1.g207	c1	207	1	0	0	1	0	1
207	Hcv1.av93.c1.g208	c1	208	1	0	0	1	0	1
208	Hcv1.av93.c1.g209	c1	209	1	0	0	1	0	1
209	Hcv1.av93.c1.g210	c1	210	1	0	0	1	0	1
210	Hcv1.av93.c1.g211	c1	211	0	1	0	1	0	0
211	Hcv1.av93.c1.g212	c1	212	1	0	0	1	0	0
212	Hcv1.av93.c1.g213	c1	213	1	0	0	1	0	1
213	Hcv1.av93.c1.g214	c1	214	1	0	0	1	0	1
214	Hcv1.av93.c1.g215	c1	215	1	0	0	1	0	0
215	Hcv1.av93.c1.g216	c1	216	1	0	0	1	0	1
216	Hcv1.av93.c1.g217	c1	217	1	0	0	1	0	1
217	Hcv1.av93.c1.g218	c1	218	1	0	0	1	0	0
218	Hcv1.av93.c1.g219	c1	219	1	0	0	1	0	0
219	Hcv1.av93.c1.g220	c1	220	1	0	0	1	0	0
220	Hcv1.av93.c1.g221	c1	221	1	0	0	1	0	1
221	Hcv1.av93.c1.g222	c1	222	1	0	0	1	0	1
222	Hcv1.av93.c1.g223	c1	223	1	0	0	1	0	1
223	Hcv1.av93.c1.g224	c1	224	1	0	0	1	0	1
224	Hcv1.av93.c1.g225	c1	225	1	0	0	1	0	1
225	Hcv1.av93.c1.g226	c1	226	1	0	0	1	0	1
226	Hcv1.av93.c1.g227	c1	227	1	0	0	1	0	1
227	Hcv1.av93.c1.g228	c1	228	1	0	0	1	0	1
228	Hcv1.av93.c1.g229	c1	229	1	0	0	1	0	1
229	Hcv1.av93.c1.g230	c1	230	1	0	0	1	0	1
230	Hcv1.av93.c1.g231	c1	231	1	0	0	1	0	0
231	Hcv1.av93.c1.g232	c1	232	1	0	0	1	0	1
232	Hcv1.av93.c1.g233	c1	233	1	0	0	1	0	1
233	Hcv1.av93.c1.g234	c1	234	1	0	0	1	0	1
234	Hcv1.av93.c1.g235	c1	235	1	0	0	1	0	1
235	Hcv1.av93.c1.g236	c1	236	1	0	0	1	0	1
236	Hcv1.av93.c1.g237	c1	237	1	0	0	1	0	1
237	Hcv1.av93.c1.g238	c1	238	1	0	0	1	0	1
238	Hcv1.av93.c1.g239	c1	239	1	0	0	1	0	1
239	Hcv1.av93.c1.g240	c1	240	1	0	0	1	0	1
240	Hcv1.av93.c1.g241	c1	241	1	0	0	1	0	0
241	Hcv1.av93.c1.g242	c1	242	1	0	0	1	0	1
242	Hcv1.av93.c1.g243	c1	243	1	0	0	1	0	1
243	Hcv1.av93.c1.g244	c1	244	1	0	0	1	0	1
244	Hcv1.av93.c1.g245	c1	245	1	0	0	1	0	1
245	Hcv1.av93.c1.g246	c1	246	1	0	0	1	0	1
246	Hcv1.av93.c1.g247	c1	247	1	0	0	1	0	1
247	Hcv1.av93.c1.g248	c1	248	1	0	0	1	0	1
248	Hcv1.av93.c1.g249	c1	249	1	0	0	1	0	1
249	Hcv1.av93.c1.g250	c1	250	1	0	0	1	0	1
250	Hcv1.av93.c1.g251	c1	251	1	0	0	1	0	1
251	Hcv1.av93.c1.g252	c1	252	1	0	0	1	0	1
252	Hcv1.av93.c1.g253	c1	253	1	0	0	1	0	1
253	Hcv1.av93.c1.g254	c1	254	1	0	0	1	0	1
254	Hcv1.av93.c1.g255	c1	255	1	0	0	1	1	0
255	Hcv1.av93.c1.g256	c1	256	1	0	0	1	0	1
256	Hcv1.av93.c1.g257	c1	257	1	0	0	1	0	1
257	Hcv1.av93.c1.g258	c1	258	1	0	0	1	0	1
258	Hcv1.av93.c1.g259	c1	259	1	0	0	1	0	1
259	Hcv1.av93.c1.g260	c1	260	1	0	0	1	0	1
260	Hcv1.av93.c1.g261	c1	261	1	0	0	1	0	1
261	Hcv1.av93.c1.g262	c1	262	1	0	0	1	0	1
262	Hcv1.av93.c1.g263	c1	263	1	0	0	1	0	0
263	Hcv1.av93.c1.g264	c1	264	1	0	0	1	0	1
264	Hcv1.av93.c1.g265	c1	265	1	0	0	1	0	1
265	Hcv1.av93.c1.g266	c1	266	1	0	0	1	0	1
266	Hcv1.av93.c1.g267	c1	267	1	0	0	1	0	1
267	Hcv1.av93.c1.g268	c1	268	1	0	0	1	0	1
268	Hcv1.av93.c1.g269	c1	269	1	0	0	1	0	1
269	Hcv1.av93.c1.g270	c1	270	1	0	0	1	0	1
270	Hcv1.av93.c1.g271	c1	271	1	0	0	1	0	1
271	Hcv1.av93.c1.g272	c1	272	1	0	0	1	0	1
272	Hcv1.av93.c1.g273	c1	273	1	0	0	1	0	1
273	Hcv1.av93.c1.g274	c1	274	1	0	0	1	0	1
274	Hcv1.av93.c1.g275	c1	275	1	0	0	1	0	1
275	Hcv1.av93.c1.g276	c1	276	1	0	0	1	0	1
276	Hcv1.av93.c1.g277	c1	277	1	0	0	1	0	1
277	Hcv1.av93.c1.g278	c1	278	1	0	0	1	0	1
278	Hcv1.av93.c1.g279	c1	279	1	0	0	1	1	0
279	Hcv1.av93.c1.g280	c1	280	1	0	0	1	0	1
280	Hcv1.av93.c1.g281	c1	281	1	0	0	1	0	1
281	Hcv1.av93.c1.g282	c1	282	1	0	0	1	0	1
282	Hcv1.av93.c1.g283	c1	283	1	0	0	1	0	0
283	Hcv1.av93.c1.g284	c1	284	1	0	0	1	1	1
284	Hcv1.av93.c1.g285	c1	285	1	0	0	1	1	0
285	Hcv1.av93.c1.g286	c1	286	1	0	0	1	1	0
286	Hcv1.av93.c1.g287	c1	287	1	0	0	1	0	1
287	Hcv1.av93.c1.g288	c1	288	1	0	0	1	0	1
288	Hcv1.av93.c1.g289	c1	289	1	0	0	1	0	1
289	Hcv1.av93.c1.g290	c1	290	1	0	0	1	0	1
290	Hcv1.av93.c1.g291	c1	291	1	0	0	1	0	0
291	Hcv1.av93.c1.g292	c1	292	1	0	0	1	1	0
292	Hcv1.av93.c1.g293	c1	293	1	0	0	1	0	1
293	Hcv1.av93.c1.g294	c1	294	1	0	0	1	0	1
294	Hcv1.av93.c1.g295	c1	295	1	0	0	1	0	1
295	Hcv1.av93.c1.g296	c1	296	1	0	0	1	0	1
296	Hcv1.av93.c1.g297	c1	297	1	0	0	1	0	1
297	Hcv1.av93.c1.g298	c1	298	1	0	0	1	0	0
298	Hcv1.av93.c1.g299	c1	299	1	0	0	1	0	1
299	Hcv1.av93.c1.g300	c1	300	1	0	0	1	0	1
300	Hcv1.av93.c1.g301	c1	301	1	0	0	1	0	0
301	Hcv1.av93.c1.g302	c1	302	1	0	0	1	0	0
302	Hcv1.av93.c1.g303	c1	303	1	0	0	1	1	0
303	Hcv1.av93.c1.g304	c1	304	1	0	0	1	0	1
304	Hcv1.av93.c1.g305	c1	305	1	0	0	1	0	1
305	Hcv1.av93.c1.g306	c1	306	1	0	0	1	0	0
306	Hcv1.av93.c1.g307	c1	307	1	0	0	1	0	0
307	Hcv1.av93.c1.g308	c1	308	1	0	0	1	0	1
308	Hcv1.av93.c1.g309	c1	309	1	0	0	1	0	0
309	Hcv1.av93.c1.g310	c1	310	1	0	0	1	0	1
310	Hcv1.av93.c1.g311	c1	311	0	1	0	1	0	1
311	Hcv1.av93.c1.g312	c1	312	0	1	0	1	0	1
312	Hcv1.av93.c1.g313	c1	313	1	0	0	1	0	1
313	Hcv1.av93.c1.g314	c1	314	1	0	0	1	0	1
314	Hcv1.av93.c1.g315	c1	315	1	0	0	1	0	1
315	Hcv1.av93.c1.g316	c1	316	1	0	0	1	0	1
316	Hcv1.av93.c1.g317	c1	317	1	0	0	1	0	1
317	Hcv1.av93.c1.g318	c1	318	1	0	0	1	0	0
318	Hcv1.av93.c1.g319	c1	319	0	1	0	1	0	1
319	Hcv1.av93.c1.g320	c1	320	1	0	0	1	1	1
320	Hcv1.av93.c1.g321	c1	321	1	0	0	1	0	1
321	Hcv1.av93.c1.g322	c1	322	1	0	0	1	0	1
322	Hcv1.av93.c1.g323	c1	323	1	0	0	1	0	0
323	Hcv1.av93.c1.g324	c1	324	1	0	0	1	0	1
324	Hcv1.av93.c1.g325	c1	325	1	0	0	1	0	0
325	Hcv1.av93.c1.g326	c1	326	1	0	0	1	0	1
326	Hcv1.av93.c1.g327	c1	327	1	0	0	1	0	1
327	Hcv1.av93.c1.g328	c1	328	1	0	0	1	0	1
328	Hcv1.av93.c1.g329	c1	329	1	0	0	1	1	0
329	Hcv1.av93.c1.g330	c1	330	1	0	0	1	1	0
330	Hcv1.av93.c1.g331	c1	331	1	0	0	1	0	1
331	Hcv1.av93.c1.g332	c1	332	0	1	0	1	0	0
332	Hcv1.av93.c1.g333	c1	333	0	0	1	0	0	0
333	Hcv1.av93.c1.g334	c1	334	1	0	0	1	0	1
334	Hcv1.av93.c1.g335	c1	335	1	0	0	1	0	1
335	Hcv1.av93.c1.g336	c1	336	0	1	0	1	0	0
336	Hcv1.av93.c1.g337	c1	337	1	0	0	1	0	0
337	Hcv1.av93.c1.g338	c1	338	1	0	0	1	0	1
338	Hcv1.av93.c1.g339	c1	339	1	0	0	1	0	1
339	Hcv1.av93.c1.g340	c1	340	1	0	0	1	0	1
340	Hcv1.av93.c1.g341	c1	341	1	0	0	1	0	1
341	Hcv1.av93.c1.g342	c1	342	1	0	0	1	0	1
342	Hcv1.av93.c1.g343	c1	343	1	0	0	1	0	0
343	Hcv1.av93.c1.g344	c1	344	1	0	0	1	0	1
344	Hcv1.av93.c1.g345	c1	345	1	0	0	1	0	1
345	Hcv1.av93.c1.g346	c1	346	1	0	0	1	0	0
346	Hcv1.av93.c1.g347	c1	347	1	0	0	1	0	0
347	Hcv1.av93.c1.g348	c1	348	1	0	0	1	0	0
348	Hcv1.av93.c1.g349	c1	349	1	0	0	1	0	0
349	Hcv1.av93.c1.g350	c1	350	1	0	0	1	0	1
350	Hcv1.av93.c1.g351	c1	351	1	0	0	1	0	1
351	Hcv1.av93.c1.g352	c1	352	1	0	0	1	0	1
352	Hcv1.av93.c1.g353	c1	353	1	0	0	1	0	1
353	Hcv1.av93.c1.g354	c1	354	1	0	0	1	0	1
354	Hcv1.av93.c1.g355	c1	355	1	0	0	1	0	0
355	Hcv1.av93.c1.g356	c1	356	1	0	0	1	0	1
356	Hcv1.av93.c1.g357	c1	357	1	0	0	1	0	1
357	Hcv1.av93.c1.g358	c1	358	1	0	0	1	0	0
358	Hcv1.av93.c1.g359	c1	359	1	0	0	1	0	0
359	Hcv1.av93.c1.g360	c1	360	1	0	0	1	0	1
360	Hcv1.av93.c1.g361	c1	361	1	0	0	1	0	1
361	Hcv1.av93.c1.g362	c1	362	1	0	0	1	0	1
362	Hcv1.av93.c1.g363	c1	363	1	0	0	1	0	1
363	Hcv1.av93.c1.g364	c1	364	1	0	0	1	0	1
364	Hcv1.av93.c1.g365	c1	365	1	0	0	1	0	1
365	Hcv1.av93.c1.g366	c1	366	1	0	0	1	0	1
366	Hcv1.av93.c1.g367	c1	367	1	0	0	1	0	1
367	Hcv1.av93.c1.g368	c1	368	1	0	0	1	0	1
368	Hcv1.av93.c1.g369	c1	369	1	0	0	1	0	1
369	Hcv1.av93.c1.g370	c1	370	1	0	0	1	0	0
370	Hcv1.av93.c1.g371	c1	371	1	0	0	1	0	0
371	Hcv1.av93.c1.g372	c1	372	1	0	0	1	0	0
372	Hcv1.av93.c1.g373	c1	373	1	0	0	1	0	1
373	Hcv1.av93.c1.g374	c1	374	1	0	0	1	0	0
374	Hcv1.av93.c1.g375	c1	375	1	0	0	1	0	1
375	Hcv1.av93.c1.g376	c1	376	1	0	0	1	0	1
376	Hcv1.av93.c1.g377	c1	377	1	0	0	1	0	1
377	Hcv1.av93.c1.g378	c1	378	1	0	0	1	0	1
378	Hcv1.av93.c1.g379	c1	379	1	0	0	1	0	0
379	Hcv1.av93.c1.g380	c1	380	1	0	0	1	0	0
380	Hcv1.av93.c1.g381	c1	381	1	0	0	1	0	1
381	Hcv1.av93.c1.g382	c1	382	1	0	0	1	0	1
382	Hcv1.av93.c1.g383	c1	383	1	0	0	1	0	0
383	Hcv1.av93.c1.g384	c1	384	1	0	0	0	0	0
384	Hcv1.av93.c1.g385	c1	385	1	0	0	1	0	1
385	Hcv1.av93.c1.g386	c1	386	1	0	0	1	0	1
386	Hcv1.av93.c1.g387	c1	387	1	0	0	1	0	0
387	Hcv1.av93.c1.g388	c1	388	1	0	0	1	0	1
388	Hcv1.av93.c1.g389	c1	389	1	0	0	1	0	1
389	Hcv1.av93.c1.g390	c1	390	1	0	0	1	0	1
390	Hcv1.av93.c1.g391	c1	391	1	0	0	1	0	0
391	Hcv1.av93.c1.g392	c1	392	1	0	0	1	0	1
392	Hcv1.av93.c1.g393	c1	393	1	0	0	1	0	0
393	Hcv1.av93.c1.g394	c1	394	1	0	0	1	0	1
394	Hcv1.av93.c1.g395	c1	395	1	0	0	1	0	1
395	Hcv1.av93.c1.g396	c1	396	1	0	0	1	0	1
396	Hcv1.av93.c1.g397	c1	397	1	0	0	1	0	1
397	Hcv1.av93.c1.g398	c1	398	1	0	0	1	0	1
398	Hcv1.av93.c1.g399	c1	399	1	0	0	1	0	1
399	Hcv1.av93.c1.g400	c1	400	1	0	0	1	0	0
400	Hcv1.av93.c1.g401	c1	401	1	0	0	1	0	1
401	Hcv1.av93.c1.g402	c1	402	1	0	0	1	0	1
402	Hcv1.av93.c1.g403	c1	403	1	0	0	1	0	1
403	Hcv1.av93.c1.g404	c1	404	1	0	0	1	0	1
404	Hcv1.av93.c1.g405	c1	405	1	0	0	1	1	0
405	Hcv1.av93.c1.g406	c1	406	1	0	0	1	0	1
406	Hcv1.av93.c1.g407	c1	407	1	0	0	1	0	1
407	Hcv1.av93.c1.g408	c1	408	1	0	0	1	0	1
408	Hcv1.av93.c1.g409	c1	409	1	0	0	1	0	1
409	Hcv1.av93.c1.g410	c1	410	1	0	0	1	0	1
410	Hcv1.av93.c1.g411	c1	411	0	1	0	1	0	1
411	Hcv1.av93.c1.g412	c1	412	1	0	0	1	0	1
412	Hcv1.av93.c1.g413	c1	413	1	0	0	1	0	0
413	Hcv1.av93.c1.g414	c1	414	1	0	0	1	0	1
414	Hcv1.av93.c1.g415	c1	415	0	1	0	1	0	1
415	Hcv1.av93.c1.g416	c1	416	0	1	0	1	0	1
416	Hcv1.av93.c1.g417	c1	417	0	1	0	1	0	1
417	Hcv1.av93.c1.g418	c1	418	0	1	0	1	1	0
418	Hcv1.av93.c1.g419	c1	419	1	0	0	1	0	1
419	Hcv1.av93.c1.g420	c1	420	1	0	0	1	0	1
420	Hcv1.av93.c1.g421	c1	421	1	0	0	1	0	1
421	Hcv1.av93.c1.g422	c1	422	1	0	0	1	0	1
422	Hcv1.av93.c1.g423	c1	423	1	0	0	1	0	1
423	Hcv1.av93.c1.g424	c1	424	1	0	0	1	0	1
424	Hcv1.av93.c1.g425	c1	425	1	0	0	1	0	0
425	Hcv1.av93.c1.g426	c1	426	1	0	0	1	0	1
426	Hcv1.av93.c1.g427	c1	427	1	0	0	1	0	0
427	Hcv1.av93.c1.g428	c1	428	0	1	0	1	0	1
428	Hcv1.av93.c1.g429	c1	429	0	1	0	1	0	1
429	Hcv1.av93.c1.g430	c1	430	1	0	0	1	0	1
430	Hcv1.av93.c1.g431	c1	431	1	0	0	1	0	1
431	Hcv1.av93.c1.g432	c1	432	1	0	0	1	0	1
432	Hcv1.av93.c1.g433	c1	433	1	0	0	1	0	1
433	Hcv1.av93.c1.g434	c1	434	1	0	0	1	0	1
434	Hcv1.av93.c1.g435	c1	435	1	0	0	1	0	0
435	Hcv1.av93.c1.g436	c1	436	1	0	0	0	0	0
436	Hcv1.av93.c1.g437	c1	437	1	0	0	1	0	1
437	Hcv1.av93.c1.g438	c1	438	1	0	0	1	0	1
438	Hcv1.av93.c1.g439	c1	439	1	0	0	1	0	1
439	Hcv1.av93.c1.g440	c1	440	1	0	0	1	0	1
440	Hcv1.av93.c1.g441	c1	441	1	0	0	1	0	0
441	Hcv1.av93.c1.g442	c1	442	1	0	0	1	0	1
442	Hcv1.av93.c1.g443	c1	443	1	0	0	1	0	1
443	Hcv1.av93.c1.g444	c1	444	1	0	0	1	0	1
444	Hcv1.av93.c1.g445	c1	445	1	0	0	1	0	1
445	Hcv1.av93.c1.g446	c1	446	1	0	0	1	0	1
446	Hcv1.av93.c1.g447	c1	447	1	0	0	1	1	0
447	Hcv1.av93.c1.g448	c1	448	0	1	0	1	0	0
448	Hcv1.av93.c1.g449	c1	449	0	0	1	1	0	1
449	Hcv1.av93.c1.g450	c1	450	1	0	0	1	0	1
450	Hcv1.av93.c1.g451	c1	451	1	0	0	1	0	0
451	Hcv1.av93.c1.g452	c1	452	1	0	0	1	0	1
452	Hcv1.av93.c1.g453	c1	453	1	0	0	1	0	1
453	Hcv1.av93.c1.g454	c1	454	1	0	0	1	0	0
454	Hcv1.av93.c1.g455	c1	455	1	0	0	0	0	0
455	Hcv1.av93.c1.g456	c1	456	1	0	0	1	1	0
456	Hcv1.av93.c1.g457	c1	457	1	0	0	1	0	1
457	Hcv1.av93.c1.g458	c1	458	1	0	0	1	0	0
458	Hcv1.av93.c1.g459	c1	459	1	0	0	1	0	1
459	Hcv1.av93.c1.g460	c1	460	1	0	0	1	0	1
460	Hcv1.av93.c1.g461	c1	461	0	1	0	1	0	1
461	Hcv1.av93.c1.g462	c1	462	1	0	0	1	0	1
462	Hcv1.av93.c1.g463	c1	463	1	0	0	1	0	1
463	Hcv1.av93.c1.g464	c1	464	1	0	0	1	0	1
464	Hcv1.av93.c1.g465	c1	465	1	0	0	1	0	1
465	Hcv1.av93.c1.g466	c1	466	1	0	0	1	0	1
466	Hcv1.av93.c1.g467	c1	467	0	1	0	1	1	1
467	Hcv1.av93.c1.g468	c1	468	1	0	0	1	0	1
468	Hcv1.av93.c1.g469	c1	469	1	0	0	1	0	0
469	Hcv1.av93.c1.g470	c1	470	1	0	0	1	0	0
470	Hcv1.av93.c1.g471	c1	471	0	1	0	1	0	0
471	Hcv1.av93.c1.g472	c1	472	1	0	0	1	0	1
472	Hcv1.av93.c1.g473	c1	473	0	1	0	0	0	0
473	Hcv1.av93.c1.g474	c1	474	1	0	0	1	0	1
474	Hcv1.av93.c1.g475	c1	475	1	0	0	1	0	0
475	Hcv1.av93.c1.g476	c1	476	1	0	0	1	0	0
476	Hcv1.av93.c1.g477	c1	477	1	0	0	1	0	1
477	Hcv1.av93.c1.g478	c1	478	1	0	0	1	0	0
478	Hcv1.av93.c1.g479	c1	479	1	0	0	1	0	0
479	Hcv1.av93.c1.g480	c1	480	1	0	0	1	0	0
480	Hcv1.av93.c1.g481	c1	481	1	0	0	1	0	0
481	Hcv1.av93.c1.g482	c1	482	1	0	0	1	0	0
482	Hcv1.av93.c1.g483	c1	483	1	0	0	1	0	0
483	Hcv1.av93.c1.g484	c1	484	1	0	0	0	0	0
484	Hcv1.av93.c1.g485	c1	485	1	0	0	1	1	0
485	Hcv1.av93.c1.g486	c1	486	1	0	0	1	0	0
486	Hcv1.av93.c1.g487	c1	487	1	0	0	1	0	1
487	Hcv1.av93.c1.g488	c1	488	1	0	0	1	0	1
488	Hcv1.av93.c1.g489	c1	489	1	0	0	1	0	1
489	Hcv1.av93.c1.g490	c1	490	1	0	0	1	0	1
490	Hcv1.av93.c1.g491	c1	491	1	0	0	1	0	1
491	Hcv1.av93.c1.g492	c1	492	1	0	0	1	0	1
492	Hcv1.av93.c1.g493	c1	493	1	0	0	1	0	1
493	Hcv1.av93.c1.g494	c1	494	1	0	0	1	0	0
494	Hcv1.av93.c1.g495	c1	495	1	0	0	1	0	0
495	Hcv1.av93.c1.g496	c1	496	1	0	0	1	0	1
496	Hcv1.av93.c1.g497	c1	497	1	0	0	1	0	1
497	Hcv1.av93.c1.g498	c1	498	1	0	0	1	0	0
498	Hcv1.av93.c1.g499	c1	499	1	0	0	1	0	1
499	Hcv1.av93.c1.g500	c1	500	1	0	0	1	0	0
500	Hcv1.av93.c1.g501	c1	501	1	0	0	1	0	0
501	Hcv1.av93.c1.g502	c1	502	1	0	0	1	0	1
502	Hcv1.av93.c1.g503	c1	503	1	0	0	1	0	1
503	Hcv1.av93.c1.g504	c1	504	1	0	0	1	0	1
504	Hcv1.av93.c1.g505	c1	505	1	0	0	1	0	1
505	Hcv1.av93.c1.g506	c1	506	1	0	0	1	0	1
506	Hcv1.av93.c1.g507	c1	507	1	0	0	1	0	1
507	Hcv1.av93.c1.g508	c1	508	1	0	0	1	0	0
508	Hcv1.av93.c1.g509	c1	509	1	0	0	1	0	0
509	Hcv1.av93.c1.g510	c1	510	1	0	0	1	0	0
510	Hcv1.av93.c1.g511	c1	511	1	0	0	1	0	1
511	Hcv1.av93.c1.g512	c1	512	1	0	0	1	0	0
512	Hcv1.av93.c1.g513	c1	513	1	0	0	1	0	1
513	Hcv1.av93.c1.g514	c1	514	1	0	0	1	0	0
514	Hcv1.av93.c1.g515	c1	515	1	0	0	1	0	1
515	Hcv1.av93.c1.g516	c1	516	1	0	0	1	0	1
516	Hcv1.av93.c1.g517	c1	517	1	0	0	1	0	1
517	Hcv1.av93.c1.g518	c1	518	1	0	0	1	0	1
518	Hcv1.av93.c1.g519	c1	519	1	0	0	1	0	1
519	Hcv1.av93.c1.g520	c1	520	1	0	0	1	0	1
520	Hcv1.av93.c1.g521	c1	521	1	0	0	1	0	0
521	Hcv1.av93.c1.g522	c1	522	1	0	0	1	0	1
522	Hcv1.av93.c1.g523	c1	523	1	0	0	1	0	1
523	Hcv1.av93.c1.g524	c1	524	1	0	0	1	0	0
524	Hcv1.av93.c1.g525	c1	525	1	0	0	1	0	1
525	Hcv1.av93.c1.g526	c1	526	1	0	0	1	0	0
526	Hcv1.av93.c1.g527	c1	527	1	0	0	1	0	0
527	Hcv1.av93.c1.g528	c1	528	1	0	0	1	0	1
528	Hcv1.av93.c1.g529	c1	529	1	0	0	1	0	1
529	Hcv1.av93.c1.g530	c1	530	1	0	0	1	0	1
530	Hcv1.av93.c1.g531	c1	531	1	0	0	1	0	0
531	Hcv1.av93.c1.g532	c1	532	1	0	0	1	0	1
532	Hcv1.av93.c1.g533	c1	533	1	0	0	1	0	0
533	Hcv1.av93.c1.g534	c1	534	1	0	0	1	0	0
534	Hcv1.av93.c1.g535	c1	535	1	0	0	1	0	1
535	Hcv1.av93.c1.g536	c1	536	0	1	0	1	0	1
536	Hcv1.av93.c1.g537	c1	537	1	0	0	1	0	1
537	Hcv1.av93.c1.g538	c1	538	1	0	0	1	1	0
538	Hcv1.av93.c1.g539	c1	539	0	1	0	1	0	1
539	Hcv1.av93.c1.g540	c1	540	1	0	0	1	0	0
540	Hcv1.av93.c1.g541	c1	541	1	0	0	1	0	1
541	Hcv1.av93.c1.g542	c1	542	1	0	0	1	0	1
542	Hcv1.av93.c1.g543	c1	543	1	0	0	1	0	0
543	Hcv1.av93.c1.g544	c1	544	1	0	0	1	0	1
544	Hcv1.av93.c1.g545	c1	545	1	0	0	1	0	1
545	Hcv1.av93.c1.g546	c1	546	1	0	0	1	0	1
546	Hcv1.av93.c1.g547	c1	547	1	0	0	1	0	1
547	Hcv1.av93.c1.g548	c1	548	1	0	0	1	0	1
548	Hcv1.av93.c1.g549	c1	549	1	0	0	1	0	1
549	Hcv1.av93.c1.g550	c1	550	1	0	0	1	0	1
550	Hcv1.av93.c1.g551	c1	551	1	0	0	1	0	0
551	Hcv1.av93.c1.g552	c1	552	1	0	0	1	0	1
552	Hcv1.av93.c1.g553	c1	553	1	0	0	0	0	0
553	Hcv1.av93.c1.g554	c1	554	1	0	0	1	0	1
554	Hcv1.av93.c1.g555	c1	555	1	0	0	1	0	1
555	Hcv1.av93.c1.g556	c1	556	1	0	0	1	0	1
556	Hcv1.av93.c1.g557	c1	557	1	0	0	1	0	1
557	Hcv1.av93.c1.g558	c1	558	1	0	0	1	0	1
558	Hcv1.av93.c1.g559	c1	559	1	0	0	1	0	1
559	Hcv1.av93.c1.g560	c1	560	1	0	0	1	0	1
560	Hcv1.av93.c1.g561	c1	561	1	0	0	1	0	1
561	Hcv1.av93.c1.g562	c1	562	1	0	0	1	0	0
562	Hcv1.av93.c1.g563	c1	563	1	0	0	0	0	0
563	Hcv1.av93.c1.g564	c1	564	1	0	0	1	0	0
564	Hcv1.av93.c1.g565	c1	565	1	0	0	1	0	0
565	Hcv1.av93.c1.g566	c1	566	1	0	0	1	0	1
566	Hcv1.av93.c1.g567	c1	567	1	0	0	1	1	0
567	Hcv1.av93.c1.g568	c1	568	1	0	0	1	0	1
568	Hcv1.av93.c1.g569	c1	569	1	0	0	1	0	1
569	Hcv1.av93.c1.g570	c1	570	1	0	0	1	0	1
570	Hcv1.av93.c1.g571	c1	571	1	0	0	0	0	0
571	Hcv1.av93.c1.g572	c1	572	1	0	0	1	0	1
572	Hcv1.av93.c1.g573	c1	573	1	0	0	1	0	0
573	Hcv1.av93.c1.g574	c1	574	1	0	0	1	0	1
574	Hcv1.av93.c1.g575	c1	575	0	1	0	1	0	0
575	Hcv1.av93.c1.g576	c1	576	1	0	0	1	0	1
576	Hcv1.av93.c1.g577	c1	577	1	0	0	1	1	0
577	Hcv1.av93.c1.g578	c1	578	1	0	0	1	0	1
578	Hcv1.av93.c1.g579	c1	579	1	0	0	1	0	1
579	Hcv1.av93.c1.g580	c1	580	1	0	0	1	0	1
580	Hcv1.av93.c1.g581	c1	581	1	0	0	1	0	1
581	Hcv1.av93.c1.g582	c1	582	1	0	0	1	0	1
582	Hcv1.av93.c1.g583	c1	583	0	1	0	1	0	0
583	Hcv1.av93.c1.g584	c1	584	0	1	0	1	0	1
584	Hcv1.av93.c1.g585	c1	585	1	0	0	1	0	1
585	Hcv1.av93.c1.g586	c1	586	1	0	0	1	0	1
586	Hcv1.av93.c1.g587	c1	587	1	0	0	1	0	1
587	Hcv1.av93.c1.g588	c1	588	1	0	0	0	0	0
588	Hcv1.av93.c1.g589	c1	589	1	0	0	1	0	1
589	Hcv1.av93.c1.g590	c1	590	1	0	0	1	0	0
590	Hcv1.av93.c1.g591	c1	591	1	0	0	1	0	0
591	Hcv1.av93.c1.g592	c1	592	0	1	0	1	0	1
592	Hcv1.av93.c1.g593	c1	593	1	0	0	1	0	0
593	Hcv1.av93.c1.g594	c1	594	1	0	0	1	0	1
594	Hcv1.av93.c1.g595	c1	595	1	0	0	1	0	1
595	Hcv1.av93.c1.g596	c1	596	1	0	0	1	0	1
596	Hcv1.av93.c1.g597	c1	597	1	0	0	1	0	0
597	Hcv1.av93.c1.g598	c1	598	1	0	0	1	0	0
598	Hcv1.av93.c1.g599	c1	599	1	0	0	1	1	0
599	Hcv1.av93.c1.g600	c1	600	1	0	0	1	0	0
600	Hcv1.av93.c1.g601	c1	601	1	0	0	1	0	1
601	Hcv1.av93.c1.g602	c1	602	1	0	0	1	0	1
602	Hcv1.av93.c1.g603	c1	603	1	0	0	1	0	1
603	Hcv1.av93.c1.g604	c1	604	1	0	0	1	0	0
604	Hcv1.av93.c1.g605	c1	605	1	0	0	1	0	0
605	Hcv1.av93.c1.g606	c1	606	1	0	0	0	0	0
606	Hcv1.av93.c1.g607	c1	607	1	0	0	1	1	0
607	Hcv1.av93.c1.g608	c1	608	1	0	0	1	0	1
608	Hcv1.av93.c1.g609	c1	609	1	0	0	1	0	1
609	Hcv1.av93.c1.g610	c1	610	1	0	0	1	0	1
610	Hcv1.av93.c1.g611	c1	611	1	0	0	1	0	1
611	Hcv1.av93.c1.g612	c1	612	1	0	0	1	0	0
612	Hcv1.av93.c1.g613	c1	613	1	0	0	1	0	0
613	Hcv1.av93.c1.g614	c1	614	1	0	0	1	0	1
614	Hcv1.av93.c1.g615	c1	615	1	0	0	1	0	1
615	Hcv1.av93.c1.g616	c1	616	1	0	0	1	0	1
616	Hcv1.av93.c1.g617	c1	617	1	0	0	1	0	1
617	Hcv1.av93.c1.g618	c1	618	1	0	0	1	0	0
618	Hcv1.av93.c1.g619	c1	619	1	0	0	1	0	0
619	Hcv1.av93.c1.g620	c1	620	1	0	0	1	0	1
620	Hcv1.av93.c1.g621	c1	621	1	0	0	1	0	1
621	Hcv1.av93.c1.g622	c1	622	1	0	0	1	0	0
622	Hcv1.av93.c1.g623	c1	623	1	0	0	1	0	1
623	Hcv1.av93.c1.g624	c1	624	1	0	0	1	1	1
624	Hcv1.av93.c1.g625	c1	625	1	0	0	1	0	1
625	Hcv1.av93.c1.g626	c1	626	1	0	0	1	0	1
626	Hcv1.av93.c1.g627	c1	627	1	0	0	1	0	1
627	Hcv1.av93.c1.g628	c1	628	1	0	0	1	0	1
628	Hcv1.av93.c1.g629	c1	629	1	0	0	1	0	1
629	Hcv1.av93.c1.g630	c1	630	1	0	0	1	0	1
630	Hcv1.av93.c1.g631	c1	631	1	0	0	1	0	1
631	Hcv1.av93.c1.g632	c1	632	1	0	0	1	0	0
632	Hcv1.av93.c1.g633	c1	633	1	0	0	1	0	0
633	Hcv1.av93.c1.g634	c1	634	1	0	0	1	0	1
634	Hcv1.av93.c1.g635	c1	635	1	0	0	1	0	0
635	Hcv1.av93.c1.g636	c1	636	1	0	0	1	0	1
636	Hcv1.av93.c1.g637	c1	637	1	0	0	1	0	0
637	Hcv1.av93.c1.g638	c1	638	1	0	0	1	1	0
638	Hcv1.av93.c1.g639	c1	639	1	0	0	1	0	1
639	Hcv1.av93.c1.g640	c1	640	1	0	0	1	0	0
640	Hcv1.av93.c1.g641	c1	641	1	0	0	1	0	0
641	Hcv1.av93.c1.g642	c1	642	1	0	0	1	0	1
642	Hcv1.av93.c1.g643	c1	643	1	0	0	1	0	0
643	Hcv1.av93.c1.g644	c1	644	1	0	0	1	0	0
644	Hcv1.av93.c1.g645	c1	645	1	0	0	1	0	0
645	Hcv1.av93.c1.g646	c1	646	1	0	0	1	0	1
646	Hcv1.av93.c1.g647	c1	647	1	0	0	1	0	1
647	Hcv1.av93.c1.g648	c1	648	1	0	0	1	0	1
648	Hcv1.av93.c1.g649	c1	649	1	0	0	1	1	0
649	Hcv1.av93.c1.g650	c1	650	1	0	0	1	0	0
650	Hcv1.av93.c1.g651	c1	651	1	0	0	1	0	0
651	Hcv1.av93.c1.g652	c1	652	1	0	0	1	0	1
652	Hcv1.av93.c1.g653	c1	653	1	0	0	1	0	1
653	Hcv1.av93.c1.g654	c1	654	1	0	0	1	0	0
654	Hcv1.av93.c1.g655	c1	655	0	1	0	1	0	1
655	Hcv1.av93.c1.g656	c1	656	1	0	0	1	0	1
656	Hcv1.av93.c1.g657	c1	657	1	0	0	1	0	1
657	Hcv1.av93.c1.g658	c1	658	0	1	0	1	0	1
658	Hcv1.av93.c1.g659	c1	659	1	0	0	1	0	0
659	Hcv1.av93.c1.g660	c1	660	1	0	0	1	0	1
660	Hcv1.av93.c1.g661	c1	661	1	0	0	1	0	0
661	Hcv1.av93.c1.g662	c1	662	1	0	0	1	0	1
662	Hcv1.av93.c1.g663	c1	663	1	0	0	1	0	1
663	Hcv1.av93.c1.g664	c1	664	1	0	0	1	0	1
664	Hcv1.av93.c1.g665	c1	665	0	1	0	1	0	0
665	Hcv1.av93.c1.g666	c1	666	0	1	0	1	0	1
666	Hcv1.av93.c1.g667	c1	667	1	0	0	1	0	1
667	Hcv1.av93.c1.g668	c1	668	1	0	0	1	0	1
668	Hcv1.av93.c1.g669	c1	669	1	0	0	1	0	1
669	Hcv1.av93.c1.g670	c1	670	1	0	0	1	0	1
670	Hcv1.av93.c1.g671	c1	671	1	0	0	1	0	1
671	Hcv1.av93.c1.g672	c1	672	1	0	0	1	0	0
672	Hcv1.av93.c1.g673	c1	673	1	0	0	1	0	1
673	Hcv1.av93.c1.g674	c1	674	1	0	0	1	0	0
674	Hcv1.av93.c1.g675	c1	675	0	1	0	0	0	0
675	Hcv1.av93.c1.g676	c1	676	0	1	0	1	0	1
676	Hcv1.av93.c1.g677	c1	677	1	0	0	1	0	1
677	Hcv1.av93.c1.g678	c1	678	0	1	0	1	0	0
678	Hcv1.av93.c1.g679	c1	679	1	0	0	1	0	0
679	Hcv1.av93.c1.g680	c1	680	1	0	0	1	0	1
680	Hcv1.av93.c1.g681	c1	681	1	0	0	1	0	1
681	Hcv1.av93.c1.g682	c1	682	1	0	0	1	0	1
682	Hcv1.av93.c1.g683	c1	683	1	0	0	1	0	1
683	Hcv1.av93.c1.g684	c1	684	1	0	0	1	0	0
684	Hcv1.av93.c1.g685	c1	685	1	0	0	1	1	0
685	Hcv1.av93.c1.g686	c1	686	1	0	0	1	0	1
686	Hcv1.av93.c1.g687	c1	687	0	1	0	1	1	0
687	Hcv1.av93.c1.g688	c1	688	1	0	0	1	0	1
688	Hcv1.av93.c1.g689	c1	689	1	0	0	1	0	0
689	Hcv1.av93.c1.g690	c1	690	1	0	0	1	0	1
690	Hcv1.av93.c1.g691	c1	691	1	0	0	1	0	0
691	Hcv1.av93.c1.g692	c1	692	1	0	0	1	0	1
692	Hcv1.av93.c1.g693	c1	693	1	0	0	1	0	0
693	Hcv1.av93.c1.g694	c1	694	1	0	0	1	0	1
694	Hcv1.av93.c1.g695	c1	695	1	0	0	1	0	1
695	Hcv1.av93.c1.g696	c1	696	1	0	0	1	0	1
696	Hcv1.av93.c1.g697	c1	697	1	0	0	1	0	1
697	Hcv1.av93.c1.g698	c1	698	1	0	0	1	0	1
698	Hcv1.av93.c1.g699	c1	699	1	0	0	1	0	1
699	Hcv1.av93.c1.g700	c1	700	1	0	0	1	0	1
700	Hcv1.av93.c1.g701	c1	701	1	0	0	1	0	0
701	Hcv1.av93.c1.g702	c1	702	1	0	0	1	0	1
702	Hcv1.av93.c1.g703	c1	703	0	1	0	1	0	0
703	Hcv1.av93.c1.g704	c1	704	0	1	0	1	0	0
704	Hcv1.av93.c1.g705	c1	705	1	0	0	1	0	1
705	Hcv1.av93.c1.g706	c1	706	1	0	0	1	0	0
706	Hcv1.av93.c1.g707	c1	707	1	0	0	1	0	0
707	Hcv1.av93.c1.g708	c1	708	1	0	0	1	0	1
708	Hcv1.av93.c1.g709	c1	709	1	0	0	1	0	0
709	Hcv1.av93.c1.g710	c1	710	1	0	0	1	0	0
710	Hcv1.av93.c1.g711	c1	711	1	0	0	1	0	1
711	Hcv1.av93.c1.g712	c1	712	1	0	0	1	0	1
712	Hcv1.av93.c1.g713	c1	713	1	0	0	1	0	0
713	Hcv1.av93.c1.g714	c1	714	1	0	0	1	0	0
714	Hcv1.av93.c1.g715	c1	715	1	0	0	1	0	1
715	Hcv1.av93.c1.g716	c1	716	1	0	0	1	0	1
716	Hcv1.av93.c1.g717	c1	717	1	0	0	1	0	1
717	Hcv1.av93.c1.g718	c1	718	0	1	0	0	0	0
718	Hcv1.av93.c1.g719	c1	719	1	0	0	1	0	1
719	Hcv1.av93.c1.g720	c1	720	1	0	0	1	0	1
720	Hcv1.av93.c1.g721	c1	721	1	0	0	1	0	1
721	Hcv1.av93.c1.g722	c1	722	1	0	0	1	0	1
722	Hcv1.av93.c1.g723	c1	723	1	0	0	1	0	1
723	Hcv1.av93.c1.g724	c1	724	1	0	0	1	0	1
724	Hcv1.av93.c1.g725	c1	725	1	0	0	1	0	1
725	Hcv1.av93.c1.g726	c1	726	1	0	0	1	0	1
726	Hcv1.av93.c1.g727	c1	727	1	0	0	1	0	0
727	Hcv1.av93.c1.g728	c1	728	1	0	0	1	0	1
728	Hcv1.av93.c1.g729	c1	729	1	0	0	1	0	0
729	Hcv1.av93.c1.g730	c1	730	1	0	0	1	0	1
730	Hcv1.av93.c1.g731	c1	731	1	0	0	1	0	1
731	Hcv1.av93.c1.g732	c1	732	1	0	0	1	0	1
732	Hcv1.av93.c1.g733	c1	733	1	0	0	1	0	1
733	Hcv1.av93.c1.g734	c1	734	1	0	0	1	0	1
734	Hcv1.av93.c1.g735	c1	735	1	0	0	1	0	1
735	Hcv1.av93.c1.g736	c1	736	1	0	0	1	0	0
736	Hcv1.av93.c1.g737	c1	737	1	0	0	1	0	1
737	Hcv1.av93.c1.g738	c1	738	1	0	0	1	0	1
738	Hcv1.av93.c1.g739	c1	739	1	0	0	1	0	1
739	Hcv1.av93.c1.g740	c1	740	1	0	0	1	0	1
740	Hcv1.av93.c1.g741	c1	741	1	0	0	1	0	1
741	Hcv1.av93.c1.g742	c1	742	1	0	0	1	0	1
742	Hcv1.av93.c1.g743	c1	743	1	0	0	1	0	0
743	Hcv1.av93.c1.g744	c1	744	1	0	0	1	0	0
744	Hcv1.av93.c1.g745	c1	745	1	0	0	1	0	1
745	Hcv1.av93.c1.g746	c1	746	1	0	0	1	0	1
746	Hcv1.av93.c1.g747	c1	747	0	1	0	1	0	1
747	Hcv1.av93.c1.g748	c1	748	1	0	0	1	0	0
748	Hcv1.av93.c1.g749	c1	749	1	0	0	1	0	1
749	Hcv1.av93.c1.g750	c1	750	1	0	0	1	0	1
750	Hcv1.av93.c1.g751	c1	751	1	0	0	1	0	1
751	Hcv1.av93.c1.g752	c1	752	1	0	0	1	0	1
752	Hcv1.av93.c1.g753	c1	753	1	0	0	1	0	1
753	Hcv1.av93.c1.g754	c1	754	1	0	0	1	0	0
754	Hcv1.av93.c1.g755	c1	755	1	0	0	1	1	0
755	Hcv1.av93.c1.g756	c1	756	1	0	0	1	0	1
756	Hcv1.av93.c1.g757	c1	757	1	0	0	1	1	0
757	Hcv1.av93.c1.g758	c1	758	1	0	0	1	0	1
758	Hcv1.av93.c1.g759	c1	759	0	1	0	1	0	1
759	Hcv1.av93.c1.g760	c1	760	1	0	0	1	0	1
760	Hcv1.av93.c1.g761	c1	761	1	0	0	1	0	1
761	Hcv1.av93.c1.g762	c1	762	1	0	0	1	0	1
762	Hcv1.av93.c1.g763	c1	763	1	0	0	1	0	1
763	Hcv1.av93.c1.g764	c1	764	1	0	0	1	0	1
764	Hcv1.av93.c1.g765	c1	765	1	0	0	1	1	1
765	Hcv1.av93.c1.g766	c1	766	1	0	0	1	0	1
766	Hcv1.av93.c1.g767	c1	767	1	0	0	1	0	1
767	Hcv1.av93.c1.g768	c1	768	1	0	0	1	0	1
768	Hcv1.av93.c1.g769	c1	769	1	0	0	1	0	1
769	Hcv1.av93.c1.g770	c1	770	0	1	0	1	0	1
770	Hcv1.av93.c1.g771	c1	771	1	0	0	1	0	1
771	Hcv1.av93.c1.g772	c1	772	1	0	0	1	0	1
772	Hcv1.av93.c1.g773	c1	773	1	0	0	1	0	1
773	Hcv1.av93.c1.g774	c1	774	1	0	0	1	0	1
774	Hcv1.av93.c1.g775	c1	775	0	1	0	1	0	0
775	Hcv1.av93.c1.g776	c1	776	0	1	0	1	0	0
776	Hcv1.av93.c1.g777	c1	777	1	0	0	1	0	1
777	Hcv1.av93.c1.g778	c1	778	1	0	0	1	0	0
778	Hcv1.av93.c1.g779	c1	779	1	0	0	1	0	0
779	Hcv1.av93.c1.g780	c1	780	1	0	0	1	0	1
780	Hcv1.av93.c1.g781	c1	781	1	0	0	1	0	0
781	Hcv1.av93.c1.g782	c1	782	1	0	0	1	0	0
782	Hcv1.av93.c1.g783	c1	783	1	0	0	1	0	0
783	Hcv1.av93.c1.g784	c1	784	1	0	0	1	0	1
784	Hcv1.av93.c1.g785	c1	785	1	0	0	1	0	1
785	Hcv1.av93.c1.g786	c1	786	1	0	0	1	0	1
786	Hcv1.av93.c1.g787	c1	787	1	0	0	1	0	1
787	Hcv1.av93.c1.g788	c1	788	1	0	0	1	0	1
788	Hcv1.av93.c1.g789	c1	789	1	0	0	1	0	1
789	Hcv1.av93.c1.g790	c1	790	1	0	0	1	0	1
790	Hcv1.av93.c1.g791	c1	791	1	0	0	1	0	1
791	Hcv1.av93.c1.g792	c1	792	1	0	0	1	0	0
792	Hcv1.av93.c1.g793	c1	793	1	0	0	1	0	1
793	Hcv1.av93.c1.g794	c1	794	1	0	0	1	0	1
794	Hcv1.av93.c1.g795	c1	795	1	0	0	1	0	0
795	Hcv1.av93.c1.g796	c1	796	1	0	0	1	0	1
796	Hcv1.av93.c1.g797	c1	797	1	0	0	1	0	0
797	Hcv1.av93.c1.g798	c1	798	1	0	0	1	1	0
798	Hcv1.av93.c1.g799	c1	799	1	0	0	1	0	1
799	Hcv1.av93.c1.g800	c1	800	1	0	0	1	0	0
800	Hcv1.av93.c1.g801	c1	801	1	0	0	1	0	0
801	Hcv1.av93.c1.g802	c1	802	1	0	0	1	0	1
802	Hcv1.av93.c1.g803	c1	803	1	0	0	1	0	1
803	Hcv1.av93.c1.g804	c1	804	1	0	0	1	0	1
804	Hcv1.av93.c1.g805	c1	805	1	0	0	1	0	0
805	Hcv1.av93.c1.g806	c1	806	1	0	0	1	0	0
806	Hcv1.av93.c1.g807	c1	807	1	0	0	1	0	1
807	Hcv1.av93.c1.g808	c1	808	1	0	0	1	0	1
808	Hcv1.av93.c1.g809	c1	809	1	0	0	1	0	0
809	Hcv1.av93.c1.g810	c1	810	1	0	0	1	0	1
810	Hcv1.av93.c1.g811	c1	811	1	0	0	1	0	0
811	Hcv1.av93.c1.g812	c1	812	1	0	0	0	0	0
812	Hcv1.av93.c1.g813	c1	813	1	0	0	1	0	1
813	Hcv1.av93.c1.g814	c1	814	1	0	0	1	0	0
814	Hcv1.av93.c1.g815	c1	815	1	0	0	1	0	1
815	Hcv1.av93.c1.g816	c1	816	1	0	0	1	0	1
816	Hcv1.av93.c1.g817	c1	817	1	0	0	1	0	0
817	Hcv1.av93.c1.g818	c1	818	1	0	0	1	0	0
818	Hcv1.av93.c1.g819	c1	819	1	0	0	1	0	0
819	Hcv1.av93.c1.g820	c1	820	1	0	0	1	0	1
820	Hcv1.av93.c1.g821	c1	821	1	0	0	1	0	1
821	Hcv1.av93.c1.g822	c1	822	1	0	0	1	0	0
822	Hcv1.av93.c1.g823	c1	823	0	0	1	0	0	0
823	Hcv1.av93.c1.g824	c1	824	0	1	0	1	0	1
824	Hcv1.av93.c1.g825	c1	825	0	1	0	1	0	0
825	Hcv1.av93.c1.g826	c1	826	0	0	1	0	0	0
826	Hcv1.av93.c1.g827	c1	827	1	0	0	1	0	0
827	Hcv1.av93.c1.g828	c1	828	1	0	0	1	0	1
828	Hcv1.av93.c1.g829	c1	829	1	0	0	1	0	1
829	Hcv1.av93.c1.g830	c1	830	1	0	0	1	0	0
830	Hcv1.av93.c1.g831	c1	831	1	0	0	1	0	1
831	Hcv1.av93.c1.g832	c1	832	1	0	0	1	0	1
832	Hcv1.av93.c1.g833	c1	833	1	0	0	1	0	1
833	Hcv1.av93.c1.g834	c1	834	1	0	0	1	0	0
834	Hcv1.av93.c1.g835	c1	835	1	0	0	1	0	1
835	Hcv1.av93.c1.g836	c1	836	1	0	0	0	0	0
836	Hcv1.av93.c1.g837	c1	837	1	0	0	1	0	1
837	Hcv1.av93.c1.g838	c1	838	1	0	0	1	0	1
838	Hcv1.av93.c1.g839	c1	839	1	0	0	1	0	1
839	Hcv1.av93.c1.g840	c1	840	1	0	0	1	0	1
840	Hcv1.av93.c1.g841	c1	841	1	0	0	1	0	1
841	Hcv1.av93.c1.g842	c1	842	1	0	0	1	0	1
842	Hcv1.av93.c1.g843	c1	843	1	0	0	1	0	0
843	Hcv1.av93.c1.g844	c1	844	1	0	0	1	0	1
844	Hcv1.av93.c1.g845	c1	845	1	0	0	1	0	1
845	Hcv1.av93.c1.g846	c1	846	1	0	0	1	0	1
846	Hcv1.av93.c1.g847	c1	847	1	0	0	1	0	1
847	Hcv1.av93.c1.g848	c1	848	1	0	0	1	0	0
848	Hcv1.av93.c1.g849	c1	849	1	0	0	1	0	0
849	Hcv1.av93.c1.g850	c1	850	1	0	0	1	0	1
850	Hcv1.av93.c1.g851	c1	851	1	0	0	1	0	0
851	Hcv1.av93.c1.g852	c1	852	1	0	0	1	0	1
852	Hcv1.av93.c1.g853	c1	853	1	0	0	1	0	1
853	Hcv1.av93.c1.g854	c1	854	1	0	0	1	0	1
854	Hcv1.av93.c1.g855	c1	855	1	0	0	1	0	1
855	Hcv1.av93.c1.g856	c1	856	1	0	0	1	0	0
856	Hcv1.av93.c1.g857	c1	857	1	0	0	1	0	1
857	Hcv1.av93.c1.g858	c1	858	1	0	0	1	0	0
858	Hcv1.av93.c1.g859	c1	859	1	0	0	1	0	0
859	Hcv1.av93.c1.g860	c1	860	1	0	0	1	0	0
860	Hcv1.av93.c1.g861	c1	861	1	0	0	1	0	0
861	Hcv1.av93.c1.g862	c1	862	1	0	0	1	0	1
862	Hcv1.av93.c1.g863	c1	863	0	1	0	1	0	1
863	Hcv1.av93.c1.g864	c1	864	1	0	0	1	0	0
864	Hcv1.av93.c1.g865	c1	865	1	0	0	1	0	0
865	Hcv1.av93.c1.g866	c1	866	1	0	0	1	0	0
866	Hcv1.av93.c1.g867	c1	867	1	0	0	1	0	1
867	Hcv1.av93.c1.g868	c1	868	1	0	0	1	0	0
868	Hcv1.av93.c1.g869	c1	869	1	0	0	1	0	1
869	Hcv1.av93.c1.g870	c1	870	1	0	0	1	0	1
870	Hcv1.av93.c1.g871	c1	871	1	0	0	1	0	0
871	Hcv1.av93.c1.g872	c1	872	1	0	0	1	0	0
872	Hcv1.av93.c1.g873	c1	873	1	0	0	1	0	1
873	Hcv1.av93.c1.g874	c1	874	1	0	0	1	0	0
874	Hcv1.av93.c1.g875	c1	875	1	0	0	1	0	0
875	Hcv1.av93.c1.g876	c1	876	1	0	0	0	0	0
876	Hcv1.av93.c1.g877	c1	877	1	0	0	1	1	0
877	Hcv1.av93.c1.g878	c1	878	1	0	0	1	0	1
878	Hcv1.av93.c1.g879	c1	879	1	0	0	1	0	1
879	Hcv1.av93.c1.g880	c1	880	1	0	0	1	0	1
880	Hcv1.av93.c1.g881	c1	881	0	1	0	1	1	0
881	Hcv1.av93.c1.g882	c1	882	0	1	0	1	0	0
882	Hcv1.av93.c1.g883	c1	883	1	0	0	1	0	1
883	Hcv1.av93.c1.g884	c1	884	1	0	0	1	0	0
884	Hcv1.av93.c1.g885	c1	885	1	0	0	1	0	1
885	Hcv1.av93.c1.g886	c1	886	1	0	0	1	0	1
886	Hcv1.av93.c1.g887	c1	887	1	0	0	1	0	1
887	Hcv1.av93.c1.g888	c1	888	1	0	0	1	0	1
888	Hcv1.av93.c1.g889	c1	889	1	0	0	1	0	1
889	Hcv1.av93.c1.g890	c1	890	1	0	0	1	0	1
890	Hcv1.av93.c1.g891	c1	891	1	0	0	0	0	0
891	Hcv1.av93.c1.g892	c1	892	1	0	0	1	0	0
892	Hcv1.av93.c1.g893	c1	893	1	0	0	1	0	0
893	Hcv1.av93.c1.g894	c1	894	1	0	0	1	0	1
894	Hcv1.av93.c1.g895	c1	895	1	0	0	1	0	0
895	Hcv1.av93.c1.g896	c1	896	1	0	0	1	0	1
896	Hcv1.av93.c1.g897	c1	897	1	0	0	1	0	1
897	Hcv1.av93.c1.g898	c1	898	1	0	0	1	0	1
898	Hcv1.av93.c1.g899	c1	899	1	0	0	0	0	0
899	Hcv1.av93.c1.g900	c1	900	1	0	0	1	0	0
900	Hcv1.av93.c1.g901	c1	901	1	0	0	1	0	1
901	Hcv1.av93.c1.g902	c1	902	1	0	0	1	0	1
902	Hcv1.av93.c1.g903	c1	903	1	0	0	1	0	1
903	Hcv1.av93.c1.g904	c1	904	1	0	0	1	0	1
904	Hcv1.av93.c1.g905	c1	905	1	0	0	1	0	1
905	Hcv1.av93.c1.g906	c1	906	1	0	0	1	0	0
906	Hcv1.av93.c1.g907	c1	907	1	0	0	1	0	0
907	Hcv1.av93.c1.g908	c1	908	1	0	0	1	0	0
908	Hcv1.av93.c1.g909	c1	909	1	0	0	1	0	1
909	Hcv1.av93.c1.g910	c1	910	1	0	0	1	0	1
910	Hcv1.av93.c1.g911	c1	911	1	0	0	1	0	0
911	Hcv1.av93.c1.g912	c1	912	1	0	0	1	0	0
912	Hcv1.av93.c1.g913	c1	913	1	0	0	1	0	1
913	Hcv1.av93.c1.g914	c1	914	1	0	0	1	0	1
914	Hcv1.av93.c1.g915	c1	915	1	0	0	1	0	1
915	Hcv1.av93.c1.g916	c1	916	1	0	0	1	0	0
916	Hcv1.av93.c1.g917	c1	917	1	0	0	1	0	1
917	Hcv1.av93.c1.g918	c1	918	1	0	0	1	0	0
918	Hcv1.av93.c1.g919	c1	919	1	0	0	1	0	1
919	Hcv1.av93.c1.g920	c1	920	1	0	0	1	0	1
920	Hcv1.av93.c1.g921	c1	921	1	0	0	1	0	0
921	Hcv1.av93.c1.g922	c1	922	1	0	0	1	0	1
922	Hcv1.av93.c1.g923	c1	923	1	0	0	1	0	1
923	Hcv1.av93.c1.g924	c1	924	1	0	0	1	0	0
924	Hcv1.av93.c1.g925	c1	925	1	0	0	1	0	0
925	Hcv1.av93.c1.g926	c1	926	1	0	0	1	0	0
926	Hcv1.av93.c1.g927	c1	927	1	0	0	1	0	0
927	Hcv1.av93.c1.g928	c1	928	1	0	0	0	0	0
928	Hcv1.av93.c1.g929	c1	929	1	0	0	1	0	0
929	Hcv1.av93.c1.g930	c1	930	1	0	0	1	0	1
930	Hcv1.av93.c1.g931	c1	931	1	0	0	1	0	1
931	Hcv1.av93.c1.g932	c1	932	1	0	0	1	0	1
932	Hcv1.av93.c1.g933	c1	933	1	0	0	1	0	0
933	Hcv1.av93.c1.g934	c1	934	1	0	0	1	0	0
934	Hcv1.av93.c1.g935	c1	935	1	0	0	1	0	0
935	Hcv1.av93.c1.g936	c1	936	1	0	0	1	0	0
936	Hcv1.av93.c1.g937	c1	937	1	0	0	1	0	0
937	Hcv1.av93.c1.g938	c1	938	1	0	0	1	0	1
938	Hcv1.av93.c1.g939	c1	939	1	0	0	1	0	0
939	Hcv1.av93.c1.g940	c1	940	1	0	0	1	1	1
940	Hcv1.av93.c1.g941	c1	941	1	0	0	1	0	1
941	Hcv1.av93.c1.g942	c1	942	1	0	0	1	0	0
942	Hcv1.av93.c1.g943	c1	943	0	1	0	1	0	0
943	Hcv1.av93.c1.g944	c1	944	1	0	0	1	0	1
944	Hcv1.av93.c1.g945	c1	945	1	0	0	1	0	1
945	Hcv1.av93.c1.g946	c1	946	1	0	0	1	0	1
946	Hcv1.av93.c1.g947	c1	947	1	0	0	0	0	0
947	Hcv1.av93.c1.g948	c1	948	1	0	0	1	0	1
948	Hcv1.av93.c1.g949	c1	949	1	0	0	1	0	0
949	Hcv1.av93.c1.g950	c1	950	1	0	0	1	0	1
950	Hcv1.av93.c1.g951	c1	951	1	0	0	1	0	1
951	Hcv1.av93.c1.g952	c1	952	1	0	0	1	0	1
952	Hcv1.av93.c1.g953	c1	953	1	0	0	1	0	1
953	Hcv1.av93.c1.g954	c1	954	1	0	0	0	0	0
954	Hcv1.av93.c1.g955	c1	955	1	0	0	1	0	1
955	Hcv1.av93.c1.g956	c1	956	1	0	0	1	0	1
956	Hcv1.av93.c1.g957	c1	957	1	0	0	1	0	1
957	Hcv1.av93.c1.g958	c1	958	1	0	0	1	0	1
958	Hcv1.av93.c1.g959	c1	959	1	0	0	1	0	0
959	Hcv1.av93.c1.g960	c1	960	1	0	0	1	0	1
960	Hcv1.av93.c1.g961	c1	961	1	0	0	1	0	1
961	Hcv1.av93.c1.g962	c1	962	1	0	0	1	0	0
962	Hcv1.av93.c1.g963	c1	963	1	0	0	1	0	0
963	Hcv1.av93.c1.g964	c1	964	1	0	0	1	0	0
964	Hcv1.av93.c1.g965	c1	965	1	0	0	1	0	1
965	Hcv1.av93.c1.g966	c1	966	1	0	0	1	0	0
966	Hcv1.av93.c1.g967	c1	967	1	0	0	1	0	1
967	Hcv1.av93.c1.g968	c1	968	1	0	0	1	0	1
968	Hcv1.av93.c1.g969	c1	969	0	1	0	1	1	0
969	Hcv1.av93.c1.g970	c1	970	1	0	0	1	0	0
970	Hcv1.av93.c1.g971	c1	971	1	0	0	1	0	1
971	Hcv1.av93.c1.g972	c1	972	1	0	0	1	0	0
972	Hcv1.av93.c1.g973	c1	973	0	0	1	1	0	1
973	Hcv1.av93.c1.g974	c1	974	1	0	0	1	0	1
974	Hcv1.av93.c1.g975	c1	975	1	0	0	1	1	1
975	Hcv1.av93.c1.g976	c1	976	1	0	0	1	0	1
976	Hcv1.av93.c1.g977	c1	977	1	0	0	1	0	1
977	Hcv1.av93.c1.g978	c1	978	1	0	0	1	0	1
978	Hcv1.av93.c1.g979	c1	979	1	0	0	1	0	1
979	Hcv1.av93.c1.g980	c1	980	1	0	0	1	0	1
980	Hcv1.av93.c1.g981	c1	981	1	0	0	1	0	1
981	Hcv1.av93.c1.g982	c1	982	1	0	0	1	1	0
982	Hcv1.av93.c1.g983	c1	983	1	0	0	1	0	1
983	Hcv1.av93.c1.g984	c1	984	1	0	0	1	0	1
984	Hcv1.av93.c1.g985	c1	985	1	0	0	1	0	1
985	Hcv1.av93.c1.g986	c1	986	1	0	0	1	0	1
986	Hcv1.av93.c1.g987	c1	987	1	0	0	1	0	0
987	Hcv1.av93.c1.g988	c1	988	1	0	0	1	0	1
988	Hcv1.av93.c1.g989	c1	989	1	0	0	1	0	1
989	Hcv1.av93.c1.g990	c1	990	1	0	0	1	0	0
990	Hcv1.av93.c1.g991	c1	991	1	0	0	1	0	0
991	Hcv1.av93.c1.g992	c1	992	1	0	0	1	0	1
992	Hcv1.av93.c1.g993	c1	993	1	0	0	1	0	0
993	Hcv1.av93.c1.g994	c1	994	1	0	0	1	0	1
994	Hcv1.av93.c1.g995	c1	995	0	0	1	1	0	0
995	Hcv1.av93.c1.g996	c1	996	1	0	0	1	0	1
996	Hcv1.av93.c1.g997	c1	997	1	0	0	1	1	1
997	Hcv1.av93.c1.g998	c1	998	1	0	0	1	0	0
998	Hcv1.av93.c1.g999	c1	999	1	0	0	1	0	1
999	Hcv1.av93.c1.g1000	c1	1000	1	0	0	1	0	1
1000	Hcv1.av93.c1.g1001	c1	1001	1	0	0	1	0	1
1001	Hcv1.av93.c1.g1002	c1	1002	0	1	0	1	0	1
1002	Hcv1.av93.c1.g1003	c1	1003	1	0	0	1	0	1
1003	Hcv1.av93.c1.g1004	c1	1004	1	0	0	1	0	0
1004	Hcv1.av93.c1.g1005	c1	1005	1	0	0	1	0	0
1005	Hcv1.av93.c1.g1006	c1	1006	1	0	0	1	0	0
1006	Hcv1.av93.c1.g1007	c1	1007	1	0	0	1	0	1
1007	Hcv1.av93.c1.g1008	c1	1008	1	0	0	1	0	0
1008	Hcv1.av93.c1.g1009	c1	1009	1	0	0	1	1	0
1009	Hcv1.av93.c1.g1010	c1	1010	1	0	0	1	0	0
1010	Hcv1.av93.c1.g1011	c1	1011	1	0	0	1	0	1
1011	Hcv1.av93.c1.g1012	c1	1012	1	0	0	1	0	1
1012	Hcv1.av93.c1.g1013	c1	1013	1	0	0	1	0	0
1013	Hcv1.av93.c1.g1014	c1	1014	0	1	0	1	1	0
1014	Hcv1.av93.c1.g1015	c1	1015	0	1	0	1	0	1
1015	Hcv1.av93.c1.g1016	c1	1016	1	0	0	1	0	1
1016	Hcv1.av93.c1.g1017	c1	1017	1	0	0	1	0	1
1017	Hcv1.av93.c1.g1018	c1	1018	0	1	0	1	0	1
1018	Hcv1.av93.c1.g1019	c1	1019	1	0	0	1	0	1
1019	Hcv1.av93.c1.g1020	c1	1020	1	0	0	1	0	1
1020	Hcv1.av93.c1.g1021	c1	1021	1	0	0	1	0	1
1021	Hcv1.av93.c1.g1022	c1	1022	1	0	0	1	0	0
1022	Hcv1.av93.c1.g1023	c1	1023	1	0	0	1	0	0
1023	Hcv1.av93.c1.g1024	c1	1024	1	0	0	1	0	1
1024	Hcv1.av93.c1.g1025	c1	1025	1	0	0	1	0	1
1025	Hcv1.av93.c1.g1026	c1	1026	1	0	0	1	0	1
1026	Hcv1.av93.c1.g1027	c1	1027	1	0	0	1	0	1
1027	Hcv1.av93.c1.g1028	c1	1028	1	0	0	1	0	1
1028	Hcv1.av93.c1.g1029	c1	1029	1	0	0	1	0	1
1029	Hcv1.av93.c1.g1030	c1	1030	1	0	0	1	0	1
1030	Hcv1.av93.c1.g1031	c1	1031	1	0	0	1	0	1
1031	Hcv1.av93.c1.g1032	c1	1032	1	0	0	1	0	1
1032	Hcv1.av93.c1.g1033	c1	1033	0	1	0	1	0	0
1033	Hcv1.av93.c1.g1034	c1	1034	1	0	0	1	0	1
1034	Hcv1.av93.c1.g1035	c1	1035	0	1	0	1	0	1
1035	Hcv1.av93.c1.g1036	c1	1036	1	0	0	1	0	1
1036	Hcv1.av93.c1.g1037	c1	1037	1	0	0	1	0	0
1037	Hcv1.av93.c1.g1038	c1	1038	1	0	0	1	0	1
1038	Hcv1.av93.c1.g1039	c1	1039	1	0	0	1	0	1
1039	Hcv1.av93.c1.g1040	c1	1040	1	0	0	1	0	1
1040	Hcv1.av93.c1.g1041	c1	1041	1	0	0	0	0	0
1041	Hcv1.av93.c1.g1042	c1	1042	1	0	0	1	0	1
1042	Hcv1.av93.c1.g1043	c1	1043	1	0	0	1	0	1
1043	Hcv1.av93.c1.g1044	c1	1044	1	0	0	1	0	1
1044	Hcv1.av93.c1.g1045	c1	1045	1	0	0	1	0	1
1045	Hcv1.av93.c1.g1046	c1	1046	1	0	0	1	0	1
1046	Hcv1.av93.c1.g1047	c1	1047	1	0	0	1	0	1
1047	Hcv1.av93.c1.g1048	c1	1048	1	0	0	1	0	1
1048	Hcv1.av93.c1.g1049	c1	1049	1	0	0	1	0	1
1049	Hcv1.av93.c1.g1050	c1	1050	1	0	0	1	0	1
1050	Hcv1.av93.c1.g1051	c1	1051	1	0	0	1	0	1
1051	Hcv1.av93.c1.g1052	c1	1052	1	0	0	1	0	0
1052	Hcv1.av93.c1.g1053	c1	1053	1	0	0	1	0	1
1053	Hcv1.av93.c1.g1054	c1	1054	1	0	0	0	0	0
1054	Hcv1.av93.c1.g1055	c1	1055	1	0	0	1	0	1
1055	Hcv1.av93.c1.g1056	c1	1056	1	0	0	1	0	1
1056	Hcv1.av93.c1.g1057	c1	1057	1	0	0	1	0	1
1057	Hcv1.av93.c1.g1058	c1	1058	1	0	0	1	0	1
1058	Hcv1.av93.c1.g1059	c1	1059	0	1	0	1	0	1
1059	Hcv1.av93.c1.g1060	c1	1060	1	0	0	1	0	0
1060	Hcv1.av93.c1.g1061	c1	1061	1	0	0	1	0	1
1061	Hcv1.av93.c1.g1062	c1	1062	1	0	0	1	0	1
1062	Hcv1.av93.c1.g1063	c1	1063	1	0	0	1	0	1
1063	Hcv1.av93.c1.g1064	c1	1064	1	0	0	1	0	0
1064	Hcv1.av93.c1.g1065	c1	1065	1	0	0	1	0	1
1065	Hcv1.av93.c1.g1066	c1	1066	0	1	0	1	0	0
1066	Hcv1.av93.c1.g1067	c1	1067	0	1	0	1	0	0
1067	Hcv1.av93.c1.g1068	c1	1068	1	0	0	1	0	1
1068	Hcv1.av93.c1.g1069	c1	1069	1	0	0	1	0	1
1069	Hcv1.av93.c1.g1070	c1	1070	0	1	0	1	0	0
1070	Hcv1.av93.c1.g1071	c1	1071	1	0	0	1	0	1
1071	Hcv1.av93.c1.g1072	c1	1072	0	1	0	1	0	0
1072	Hcv1.av93.c1.g1073	c1	1073	1	0	0	1	0	1
1073	Hcv1.av93.c1.g1074	c1	1074	0	1	0	1	0	0
1074	Hcv1.av93.c1.g1075	c1	1075	0	1	0	1	0	1
1075	Hcv1.av93.c1.g1076	c1	1076	0	0	1	1	0	0
1076	Hcv1.av93.c1.g1077	c1	1077	1	0	0	1	0	1
1077	Hcv1.av93.c1.g1078	c1	1078	1	0	0	0	0	0
1078	Hcv1.av93.c1.g1079	c1	1079	1	0	0	1	0	1
1079	Hcv1.av93.c1.g1080	c1	1080	1	0	0	1	0	1
1080	Hcv1.av93.c1.g1081	c1	1081	1	0	0	1	0	0
1081	Hcv1.av93.c1.g1082	c1	1082	1	0	0	1	0	1
1082	Hcv1.av93.c1.g1083	c1	1083	1	0	0	1	0	1
1083	Hcv1.av93.c1.g1084	c1	1084	1	0	0	1	0	1
1084	Hcv1.av93.c1.g1085	c1	1085	1	0	0	1	1	1
1085	Hcv1.av93.c1.g1086	c1	1086	1	0	0	1	0	1
1086	Hcv1.av93.c1.g1087	c1	1087	1	0	0	1	0	1
1087	Hcv1.av93.c1.g1088	c1	1088	1	0	0	1	0	0
1088	Hcv1.av93.c1.g1089	c1	1089	1	0	0	1	0	1
1089	Hcv1.av93.c1.g1090	c1	1090	1	0	0	1	0	0
1090	Hcv1.av93.c1.g1091	c1	1091	1	0	0	1	0	0
1091	Hcv1.av93.c1.g1092	c1	1092	1	0	0	1	0	1
1092	Hcv1.av93.c1.g1093	c1	1093	1	0	0	1	0	1
1093	Hcv1.av93.c1.g1094	c1	1094	1	0	0	1	0	1
1094	Hcv1.av93.c1.g1095	c1	1095	1	0	0	1	0	1
1095	Hcv1.av93.c1.g1096	c1	1096	1	0	0	1	0	1
1096	Hcv1.av93.c1.g1097	c1	1097	0	1	0	1	0	1
1097	Hcv1.av93.c1.g1098	c1	1098	1	0	0	1	0	0
1098	Hcv1.av93.c1.g1099	c1	1099	0	1	0	1	0	0
1099	Hcv1.av93.c1.g1100	c1	1100	1	0	0	1	0	1
1100	Hcv1.av93.c1.g1101	c1	1101	1	0	0	1	0	1
1101	Hcv1.av93.c1.g1102	c1	1102	0	1	0	1	0	1
1102	Hcv1.av93.c1.g1103	c1	1103	1	0	0	1	0	1
1103	Hcv1.av93.c1.g1104	c1	1104	1	0	0	1	0	1
1104	Hcv1.av93.c1.g1105	c1	1105	1	0	0	1	0	1
1105	Hcv1.av93.c1.g1106	c1	1106	1	0	0	1	0	1
1106	Hcv1.av93.c1.g1107	c1	1107	1	0	0	1	0	0
1107	Hcv1.av93.c1.g1108	c1	1108	0	1	0	1	0	0
1108	Hcv1.av93.c1.g1109	c1	1109	0	1	0	1	1	0
1109	Hcv1.av93.c1.g1110	c1	1110	1	0	0	1	0	0
1110	Hcv1.av93.c1.g1111	c1	1111	1	0	0	1	0	0
1111	Hcv1.av93.c1.g1112	c1	1112	1	0	0	1	1	1
1112	Hcv1.av93.c1.g1113	c1	1113	0	1	0	1	1	0
1113	Hcv1.av93.c1.g1114	c1	1114	1	0	0	1	0	1
1114	Hcv1.av93.c1.g1115	c1	1115	1	0	0	1	0	0
1115	Hcv1.av93.c1.g1116	c1	1116	1	0	0	1	0	0
1116	Hcv1.av93.c1.g1117	c1	1117	1	0	0	1	0	0
1117	Hcv1.av93.c1.g1118	c1	1118	1	0	0	1	0	1
1118	Hcv1.av93.c1.g1119	c1	1119	1	0	0	1	0	1
1119	Hcv1.av93.c1.g1120	c1	1120	1	0	0	1	0	1
1120	Hcv1.av93.c1.g1121	c1	1121	1	0	0	1	0	0
1121	Hcv1.av93.c1.g1122	c1	1122	1	0	0	1	0	0
1122	Hcv1.av93.c1.g1123	c1	1123	1	0	0	1	0	0
1123	Hcv1.av93.c1.g1124	c1	1124	1	0	0	1	0	1
1124	Hcv1.av93.c1.g1125	c1	1125	1	0	0	0	0	0
1125	Hcv1.av93.c1.g1126	c1	1126	1	0	0	1	0	0
1126	Hcv1.av93.c1.g1127	c1	1127	1	0	0	1	0	1
1127	Hcv1.av93.c1.g1128	c1	1128	1	0	0	1	0	1
1128	Hcv1.av93.c1.g1129	c1	1129	0	1	0	0	0	0
1129	Hcv1.av93.c1.g1130	c1	1130	0	0	1	1	0	0
1130	Hcv1.av93.c1.g1131	c1	1131	1	0	0	1	0	1
1131	Hcv1.av93.c1.g1132	c1	1132	1	0	0	0	0	0
1132	Hcv1.av93.c1.g1133	c1	1133	1	0	0	1	0	0
1133	Hcv1.av93.c1.g1134	c1	1134	1	0	0	1	0	1
1134	Hcv1.av93.c1.g1135	c1	1135	1	0	0	1	0	1
1135	Hcv1.av93.c1.g1136	c1	1136	1	0	0	1	0	1
1136	Hcv1.av93.c1.g1137	c1	1137	1	0	0	1	0	1
1137	Hcv1.av93.c1.g1138	c1	1138	1	0	0	1	0	1
1138	Hcv1.av93.c1.g1139	c1	1139	1	0	0	1	0	1
1139	Hcv1.av93.c1.g1140	c1	1140	1	0	0	1	0	1
1140	Hcv1.av93.c1.g1141	c1	1141	1	0	0	1	0	1
1141	Hcv1.av93.c1.g1142	c1	1142	1	0	0	1	0	0
1142	Hcv1.av93.c1.g1143	c1	1143	1	0	0	1	0	1
1143	Hcv1.av93.c1.g1144	c1	1144	1	0	0	1	0	1
1144	Hcv1.av93.c1.g1145	c1	1145	1	0	0	1	0	0
1145	Hcv1.av93.c1.g1146	c1	1146	1	0	0	1	0	0
1146	Hcv1.av93.c1.g1147	c1	1147	1	0	0	1	0	1
1147	Hcv1.av93.c1.g1148	c1	1148	1	0	0	1	0	0
1148	Hcv1.av93.c1.g1149	c1	1149	1	0	0	1	0	0
1149	Hcv1.av93.c1.g1150	c1	1150	1	0	0	1	0	1
1150	Hcv1.av93.c1.g1151	c1	1151	1	0	0	1	0	1
1151	Hcv1.av93.c1.g1152	c1	1152	1	0	0	1	0	1
1152	Hcv1.av93.c1.g1153	c1	1153	1	0	0	1	0	0
1153	Hcv1.av93.c1.g1154	c1	1154	0	1	0	1	0	1
1154	Hcv1.av93.c1.g1155	c1	1155	1	0	0	1	0	1
1155	Hcv1.av93.c1.g1156	c1	1156	1	0	0	1	0	0
1156	Hcv1.av93.c1.g1157	c1	1157	1	0	0	1	0	0
1157	Hcv1.av93.c1.g1158	c1	1158	1	0	0	1	0	0
1158	Hcv1.av93.c1.g1159	c1	1159	0	1	0	1	0	1
1159	Hcv1.av93.c1.g1160	c1	1160	0	1	0	1	0	1
1160	Hcv1.av93.c1.g1161	c1	1161	1	0	0	1	0	1
1161	Hcv1.av93.c1.g1162	c1	1162	1	0	0	1	0	1
1162	Hcv1.av93.c1.g1163	c1	1163	1	0	0	1	0	1
1163	Hcv1.av93.c1.g1164	c1	1164	1	0	0	1	0	1
1164	Hcv1.av93.c1.g1165	c1	1165	1	0	0	1	1	0
1165	Hcv1.av93.c1.g1166	c1	1166	1	0	0	1	0	1
1166	Hcv1.av93.c1.g1167	c1	1167	1	0	0	1	0	1
1167	Hcv1.av93.c1.g1168	c1	1168	1	0	0	1	0	1
1168	Hcv1.av93.c1.g1169	c1	1169	1	0	0	1	0	1
1169	Hcv1.av93.c1.g1170	c1	1170	1	0	0	1	0	0
1170	Hcv1.av93.c1.g1171	c1	1171	1	0	0	1	0	1
1171	Hcv1.av93.c1.g1172	c1	1172	1	0	0	1	0	0
1172	Hcv1.av93.c1.g1173	c1	1173	1	0	0	1	0	0
1173	Hcv1.av93.c1.g1174	c1	1174	1	0	0	1	0	1
1174	Hcv1.av93.c1.g1175	c1	1175	1	0	0	1	0	0
1175	Hcv1.av93.c1.g1176	c1	1176	1	0	0	1	0	1
1176	Hcv1.av93.c1.g1177	c1	1177	1	0	0	1	0	1
1177	Hcv1.av93.c1.g1178	c1	1178	1	0	0	1	0	0
1178	Hcv1.av93.c1.g1179	c1	1179	1	0	0	1	0	0
1179	Hcv1.av93.c1.g1180	c1	1180	1	0	0	1	0	1
1180	Hcv1.av93.c1.g1181	c1	1181	1	0	0	1	0	1
1181	Hcv1.av93.c1.g1182	c1	1182	1	0	0	1	0	1
1182	Hcv1.av93.c1.g1183	c1	1183	1	0	0	1	0	1
1183	Hcv1.av93.c1.g1184	c1	1184	1	0	0	1	0	0
1184	Hcv1.av93.c1.g1185	c1	1185	1	0	0	1	0	1
1185	Hcv1.av93.c1.g1186	c1	1186	1	0	0	1	0	1
1186	Hcv1.av93.c1.g1187	c1	1187	1	0	0	1	0	1
1187	Hcv1.av93.c1.g1188	c1	1188	1	0	0	1	0	1
1188	Hcv1.av93.c1.g1189	c1	1189	1	0	0	1	1	0
1189	Hcv1.av93.c1.g1190	c1	1190	1	0	0	1	0	1
1190	Hcv1.av93.c1.g1191	c1	1191	1	0	0	1	0	0
1191	Hcv1.av93.c1.g1192	c1	1192	1	0	0	1	0	1
1192	Hcv1.av93.c1.g1193	c1	1193	1	0	0	1	0	1
1193	Hcv1.av93.c1.g1194	c1	1194	1	0	0	1	0	1
1194	Hcv1.av93.c1.g1195	c1	1195	1	0	0	1	0	0
1195	Hcv1.av93.c1.g1196	c1	1196	1	0	0	1	0	0
1196	Hcv1.av93.c1.g1197	c1	1197	1	0	0	1	0	1
1197	Hcv1.av93.c1.g1198	c1	1198	1	0	0	1	0	1
1198	Hcv1.av93.c1.g1199	c1	1199	1	0	0	1	0	1
1199	Hcv1.av93.c1.g1200	c1	1200	1	0	0	1	0	1
1200	Hcv1.av93.c1.g1201	c1	1201	1	0	0	1	0	1
1201	Hcv1.av93.c1.g1202	c1	1202	1	0	0	1	0	1
1202	Hcv1.av93.c1.g1203	c1	1203	1	0	0	0	0	0
1203	Hcv1.av93.c1.g1204	c1	1204	1	0	0	1	0	0
1204	Hcv1.av93.c1.g1205	c1	1205	1	0	0	1	0	1
1205	Hcv1.av93.c1.g1206	c1	1206	1	0	0	1	0	1
1206	Hcv1.av93.c1.g1207	c1	1207	1	0	0	1	0	1
1207	Hcv1.av93.c1.g1208	c1	1208	1	0	0	1	0	0
1208	Hcv1.av93.c1.g1209	c1	1209	1	0	0	1	0	0
1209	Hcv1.av93.c1.g1210	c1	1210	1	0	0	1	0	1
1210	Hcv1.av93.c1.g1211	c1	1211	1	0	0	1	0	1
1211	Hcv1.av93.c1.g1212	c1	1212	1	0	0	1	0	1
1212	Hcv1.av93.c1.g1213	c1	1213	1	0	0	1	0	1
1213	Hcv1.av93.c1.g1214	c1	1214	1	0	0	1	0	1
1214	Hcv1.av93.c1.g1215	c1	1215	1	0	0	1	0	1
1215	Hcv1.av93.c1.g1216	c1	1216	1	0	0	1	0	1
1216	Hcv1.av93.c1.g1217	c1	1217	1	0	0	1	0	1
1217	Hcv1.av93.c1.g1218	c1	1218	1	0	0	1	0	1
1218	Hcv1.av93.c1.g1219	c1	1219	1	0	0	1	0	1
1219	Hcv1.av93.c1.g1220	c1	1220	1	0	0	1	0	1
1220	Hcv1.av93.c1.g1221	c1	1221	1	0	0	1	0	0
1221	Hcv1.av93.c1.g1222	c1	1222	1	0	0	1	0	1
1222	Hcv1.av93.c1.g1223	c1	1223	1	0	0	1	0	1
1223	Hcv1.av93.c1.g1224	c1	1224	1	0	0	1	0	1
1224	Hcv1.av93.c1.g1225	c1	1225	1	0	0	1	0	1
1225	Hcv1.av93.c1.g1226	c1	1226	1	0	0	1	0	0
1226	Hcv1.av93.c1.g1227	c1	1227	1	0	0	1	0	1
1227	Hcv1.av93.c1.g1228	c1	1228	1	0	0	1	0	0
1228	Hcv1.av93.c1.g1229	c1	1229	1	0	0	1	0	1
1229	Hcv1.av93.c1.g1230	c1	1230	1	0	0	1	0	1
1230	Hcv1.av93.c1.g1231	c1	1231	1	0	0	1	0	0
1231	Hcv1.av93.c1.g1232	c1	1232	1	0	0	1	0	1
1232	Hcv1.av93.c1.g1233	c1	1233	0	0	1	1	0	0
1233	Hcv1.av93.c1.g1234	c1	1234	1	0	0	1	0	1
1234	Hcv1.av93.c1.g1235	c1	1235	1	0	0	1	0	1
1235	Hcv1.av93.c1.g1236	c1	1236	1	0	0	1	0	0
1236	Hcv1.av93.c1.g1237	c1	1237	1	0	0	1	0	1
1237	Hcv1.av93.c1.g1238	c1	1238	1	0	0	1	0	1
1238	Hcv1.av93.c1.g1239	c1	1239	1	0	0	1	0	1
1239	Hcv1.av93.c1.g1240	c1	1240	1	0	0	1	0	1
1240	Hcv1.av93.c1.g1241	c1	1241	1	0	0	1	0	1
1241	Hcv1.av93.c1.g1242	c1	1242	1	0	0	1	0	1
1242	Hcv1.av93.c1.g1243	c1	1243	1	0	0	1	0	1
1243	Hcv1.av93.c1.g1244	c1	1244	1	0	0	1	0	1
1244	Hcv1.av93.c1.g1245	c1	1245	1	0	0	1	0	1
1245	Hcv1.av93.c1.g1246	c1	1246	1	0	0	1	0	1
1246	Hcv1.av93.c1.g1247	c1	1247	1	0	0	1	0	1
1247	Hcv1.av93.c1.g1248	c1	1248	1	0	0	1	0	1
1248	Hcv1.av93.c1.g1249	c1	1249	1	0	0	1	0	1
1249	Hcv1.av93.c1.g1250	c1	1250	1	0	0	1	0	0
1250	Hcv1.av93.c1.g1251	c1	1251	1	0	0	1	0	1
1251	Hcv1.av93.c1.g1252	c1	1252	1	0	0	1	0	1
1252	Hcv1.av93.c1.g1253	c1	1253	1	0	0	1	0	1
1253	Hcv1.av93.c1.g1254	c1	1254	1	0	0	1	0	1
1254	Hcv1.av93.c1.g1255	c1	1255	1	0	0	1	0	1
1255	Hcv1.av93.c1.g1256	c1	1256	1	0	0	1	0	1
1256	Hcv1.av93.c1.g1257	c1	1257	1	0	0	1	0	0
1257	Hcv1.av93.c1.g1258	c1	1258	1	0	0	1	0	1
1258	Hcv1.av93.c1.g1259	c1	1259	1	0	0	1	0	1
1259	Hcv1.av93.c1.g1260	c1	1260	1	0	0	1	0	0
1260	Hcv1.av93.c1.g1261	c1	1261	1	0	0	1	0	1
1261	Hcv1.av93.c1.g1262	c1	1262	1	0	0	1	0	0
1262	Hcv1.av93.c1.g1263	c1	1263	1	0	0	1	0	0
1263	Hcv1.av93.c1.g1264	c1	1264	1	0	0	1	0	1
1264	Hcv1.av93.c1.g1265	c1	1265	1	0	0	0	0	0
1265	Hcv1.av93.c1.g1266	c1	1266	1	0	0	1	0	1
1266	Hcv1.av93.c1.g1267	c1	1267	1	0	0	1	0	1
1267	Hcv1.av93.c1.g1268	c1	1268	1	0	0	1	0	1
1268	Hcv1.av93.c1.g1269	c1	1269	1	0	0	1	0	1
1269	Hcv1.av93.c1.g1270	c1	1270	1	0	0	1	0	1
1270	Hcv1.av93.c1.g1271	c1	1271	1	0	0	1	0	1
1271	Hcv1.av93.c1.g1272	c1	1272	1	0	0	1	0	0
1272	Hcv1.av93.c1.g1273	c1	1273	1	0	0	1	0	1
1273	Hcv1.av93.c1.g1274	c1	1274	1	0	0	1	0	1
1274	Hcv1.av93.c1.g1275	c1	1275	1	0	0	1	0	1
1275	Hcv1.av93.c1.g1276	c1	1276	1	0	0	1	0	1
1276	Hcv1.av93.c1.g1277	c1	1277	1	0	0	1	0	1
1277	Hcv1.av93.c1.g1278	c1	1278	1	0	0	1	0	0
1278	Hcv1.av93.c1.g1279	c1	1279	1	0	0	1	0	1
1279	Hcv1.av93.c1.g1280	c1	1280	1	0	0	1	0	1
1280	Hcv1.av93.c1.g1281	c1	1281	1	0	0	1	0	0
1281	Hcv1.av93.c1.g1282	c1	1282	1	0	0	1	0	1
1282	Hcv1.av93.c1.g1283	c1	1283	1	0	0	1	0	0
1283	Hcv1.av93.c1.g1284	c1	1284	1	0	0	1	0	1
1284	Hcv1.av93.c1.g1285	c1	1285	1	0	0	1	0	1
1285	Hcv1.av93.c1.g1286	c1	1286	1	0	0	1	0	1
1286	Hcv1.av93.c1.g1287	c1	1287	1	0	0	1	0	0
1287	Hcv1.av93.c1.g1288	c1	1288	1	0	0	1	0	1
1288	Hcv1.av93.c1.g1289	c1	1289	1	0	0	1	0	0
1289	Hcv1.av93.c1.g1290	c1	1290	1	0	0	1	0	1
1290	Hcv1.av93.c1.g1291	c1	1291	1	0	0	1	0	1
1291	Hcv1.av93.c1.g1292	c1	1292	1	0	0	1	0	0
1292	Hcv1.av93.c1.g1293	c1	1293	1	0	0	1	0	1
1293	Hcv1.av93.c1.g1294	c1	1294	1	0	0	1	0	1
1294	Hcv1.av93.c1.g1295	c1	1295	1	0	0	1	0	1
1295	Hcv1.av93.c1.g1296	c1	1296	1	0	0	1	0	1
1296	Hcv1.av93.c1.g1297	c1	1297	1	0	0	1	0	1
1297	Hcv1.av93.c1.g1298	c1	1298	1	0	0	1	0	0
1298	Hcv1.av93.c1.g1299	c1	1299	1	0	0	1	0	0
1299	Hcv1.av93.c1.g1300	c1	1300	0	1	0	0	0	0
1300	Hcv1.av93.c1.g1301	c1	1301	1	0	0	1	0	1
1301	Hcv1.av93.c1.g1302	c1	1302	1	0	0	1	0	1
1302	Hcv1.av93.c1.g1303	c1	1303	1	0	0	1	0	0
1303	Hcv1.av93.c1.g1304	c1	1304	0	1	0	1	0	1
1304	Hcv1.av93.c1.g1305	c1	1305	1	0	0	1	0	0
1305	Hcv1.av93.c1.g1306	c1	1306	1	0	0	1	0	1
1306	Hcv1.av93.c1.g1307	c1	1307	1	0	0	1	0	1
1307	Hcv1.av93.c1.g1308	c1	1308	1	0	0	1	0	1
1308	Hcv1.av93.c1.g1309	c1	1309	1	0	0	1	0	1
1309	Hcv1.av93.c1.g1310	c1	1310	1	0	0	1	0	1
1310	Hcv1.av93.c1.g1311	c1	1311	1	0	0	1	1	0
1311	Hcv1.av93.c1.g1312	c1	1312	1	0	0	0	0	0
1312	Hcv1.av93.c1.g1313	c1	1313	1	0	0	1	0	1
1313	Hcv1.av93.c1.g1314	c1	1314	1	0	0	1	0	0
1314	Hcv1.av93.c1.g1315	c1	1315	1	0	0	1	0	1
1315	Hcv1.av93.c1.g1316	c1	1316	1	0	0	1	0	1
1316	Hcv1.av93.c1.g1317	c1	1317	1	0	0	1	0	1
1317	Hcv1.av93.c1.g1318	c1	1318	1	0	0	1	0	1
1318	Hcv1.av93.c1.g1319	c1	1319	1	0	0	1	1	0
1319	Hcv1.av93.c1.g1320	c1	1320	1	0	0	1	0	0
1320	Hcv1.av93.c1.g1321	c1	1321	1	0	0	1	0	1
1321	Hcv1.av93.c1.g1322	c1	1322	1	0	0	1	0	1
1322	Hcv1.av93.c1.g1323	c1	1323	1	0	0	1	0	0
1323	Hcv1.av93.c1.g1324	c1	1324	1	0	0	1	0	1
1324	Hcv1.av93.c1.g1325	c1	1325	1	0	0	1	0	1
1325	Hcv1.av93.c1.g1326	c1	1326	1	0	0	1	0	1
1326	Hcv1.av93.c1.g1327	c1	1327	1	0	0	1	0	1
1327	Hcv1.av93.c1.g1328	c1	1328	1	0	0	1	0	0
1328	Hcv1.av93.c1.g1329	c1	1329	1	0	0	1	0	0
1329	Hcv1.av93.c1.g1330	c1	1330	1	0	0	1	0	1
1330	Hcv1.av93.c1.g1331	c1	1331	1	0	0	1	0	0
1331	Hcv1.av93.c1.g1332	c1	1332	1	0	0	1	0	1
1332	Hcv1.av93.c1.g1333	c1	1333	1	0	0	1	0	1
1333	Hcv1.av93.c1.g1334	c1	1334	1	0	0	1	0	1
1334	Hcv1.av93.c1.g1335	c1	1335	1	0	0	1	0	1
1335	Hcv1.av93.c1.g1336	c1	1336	1	0	0	1	0	0
1336	Hcv1.av93.c1.g1337	c1	1337	1	0	0	1	0	0
1337	Hcv1.av93.c1.g1338	c1	1338	1	0	0	0	0	0
1338	Hcv1.av93.c1.g1339	c1	1339	1	0	0	0	0	0
1339	Hcv1.av93.c1.g1340	c1	1340	1	0	0	1	0	1
1340	Hcv1.av93.c1.g1341	c1	1341	1	0	0	1	0	1
1341	Hcv1.av93.c1.g1342	c1	1342	1	0	0	1	0	1
1342	Hcv1.av93.c1.g1343	c1	1343	1	0	0	1	0	1
1343	Hcv1.av93.c1.g1344	c1	1344	1	0	0	1	0	0
1344	Hcv1.av93.c1.g1345	c1	1345	1	0	0	1	0	1
1345	Hcv1.av93.c1.g1346	c1	1346	1	0	0	1	0	1
1346	Hcv1.av93.c1.g1347	c1	1347	1	0	0	1	0	0
1347	Hcv1.av93.c1.g1348	c1	1348	1	0	0	1	0	1
1348	Hcv1.av93.c1.g1349	c1	1349	1	0	0	1	0	1
1349	Hcv1.av93.c1.g1350	c1	1350	1	0	0	1	0	1
1350	Hcv1.av93.c1.g1351	c1	1351	1	0	0	1	0	1
1351	Hcv1.av93.c1.g1352	c1	1352	1	0	0	1	0	1
1352	Hcv1.av93.c1.g1353	c1	1353	1	0	0	1	0	1
1353	Hcv1.av93.c1.g1354	c1	1354	1	0	0	1	0	1
1354	Hcv1.av93.c1.g1355	c1	1355	1	0	0	1	0	1
1355	Hcv1.av93.c1.g1356	c1	1356	1	0	0	1	0	1
1356	Hcv1.av93.c1.g1357	c1	1357	1	0	0	1	0	1
1357	Hcv1.av93.c1.g1358	c1	1358	1	0	0	1	0	1
1358	Hcv1.av93.c1.g1359	c1	1359	1	0	0	1	0	0
1359	Hcv1.av93.c1.g1360	c1	1360	1	0	0	1	0	1
1360	Hcv1.av93.c1.g1361	c1	1361	1	0	0	1	0	1
1361	Hcv1.av93.c1.g1362	c1	1362	1	0	0	1	0	1
1362	Hcv1.av93.c1.g1363	c1	1363	1	0	0	1	0	0
1363	Hcv1.av93.c1.g1364	c1	1364	1	0	0	1	0	1
1364	Hcv1.av93.c1.g1365	c1	1365	1	0	0	1	0	1
1365	Hcv1.av93.c1.g1366	c1	1366	1	0	0	1	0	0
1366	Hcv1.av93.c1.g1367	c1	1367	1	0	0	1	0	1
1367	Hcv1.av93.c1.g1368	c1	1368	1	0	0	1	0	1
1368	Hcv1.av93.c1.g1369	c1	1369	1	0	0	1	0	0
1369	Hcv1.av93.c1.g1370	c1	1370	1	0	0	1	0	1
1370	Hcv1.av93.c1.g1371	c1	1371	1	0	0	1	0	1
1371	Hcv1.av93.c1.g1372	c1	1372	1	0	0	1	0	1
1372	Hcv1.av93.c1.g1373	c1	1373	1	0	0	1	1	1
1373	Hcv1.av93.c1.g1374	c1	1374	1	0	0	1	0	1
1374	Hcv1.av93.c1.g1375	c1	1375	1	0	0	1	0	1
1375	Hcv1.av93.c1.g1376	c1	1376	1	0	0	1	0	1
1376	Hcv1.av93.c1.g1377	c1	1377	1	0	0	1	0	1
1377	Hcv1.av93.c1.g1378	c1	1378	1	0	0	1	0	0
1378	Hcv1.av93.c1.g1379	c1	1379	1	0	0	1	0	0
1379	Hcv1.av93.c1.g1380	c1	1380	1	0	0	1	0	1
1380	Hcv1.av93.c1.g1381	c1	1381	1	0	0	1	0	0
1381	Hcv1.av93.c1.g1382	c1	1382	1	0	0	1	0	1
1382	Hcv1.av93.c1.g1383	c1	1383	1	0	0	1	0	1
1383	Hcv1.av93.c1.g1384	c1	1384	0	1	0	1	0	1
1384	Hcv1.av93.c1.g1385	c1	1385	0	1	0	1	0	1
1385	Hcv1.av93.c1.g1386	c1	1386	1	0	0	1	0	1
1386	Hcv1.av93.c1.g1387	c1	1387	1	0	0	1	0	1
1387	Hcv1.av93.c1.g1388	c1	1388	1	0	0	1	0	0
1388	Hcv1.av93.c1.g1389	c1	1389	1	0	0	1	0	1
1389	Hcv1.av93.c1.g1390	c1	1390	0	1	0	1	0	0
1390	Hcv1.av93.c1.g1391	c1	1391	1	0	0	1	0	1
1391	Hcv1.av93.c1.g1392	c1	1392	0	1	0	1	0	1
1392	Hcv1.av93.c1.g1393	c1	1393	1	0	0	1	0	1
1393	Hcv1.av93.c1.g1394	c1	1394	1	0	0	1	1	0
1394	Hcv1.av93.c1.g1395	c1	1395	1	0	0	1	0	1
1395	Hcv1.av93.c1.g1396	c1	1396	1	0	0	1	0	1
1396	Hcv1.av93.c1.g1397	c1	1397	1	0	0	1	0	0
1397	Hcv1.av93.c1.g1398	c1	1398	1	0	0	1	0	1
1398	Hcv1.av93.c1.g1399	c1	1399	1	0	0	1	0	0
1399	Hcv1.av93.c1.g1400	c1	1400	1	0	0	1	0	1
1400	Hcv1.av93.c1.g1401	c1	1401	1	0	0	1	0	0
1401	Hcv1.av93.c1.g1402	c1	1402	1	0	0	1	0	0
1402	Hcv1.av93.c1.g1403	c1	1403	1	0	0	1	0	0
1403	Hcv1.av93.c1.g1404	c1	1404	1	0	0	1	0	1
1404	Hcv1.av93.c1.g1405	c1	1405	1	0	0	1	0	0
1405	Hcv1.av93.c1.g1406	c1	1406	1	0	0	1	0	1
1406	Hcv1.av93.c1.g1407	c1	1407	1	0	0	1	0	0
1407	Hcv1.av93.c1.g1408	c1	1408	1	0	0	1	0	0
1408	Hcv1.av93.c1.g1409	c1	1409	1	0	0	1	0	1
1409	Hcv1.av93.c1.g1410	c1	1410	1	0	0	1	0	0
1410	Hcv1.av93.c1.g1411	c1	1411	1	0	0	1	0	1
1411	Hcv1.av93.c1.g1412	c1	1412	1	0	0	1	0	1
1412	Hcv1.av93.c1.g1413	c1	1413	1	0	0	1	0	0
1413	Hcv1.av93.c1.g1414	c1	1414	1	0	0	1	0	0
1414	Hcv1.av93.c1.g1415	c1	1415	1	0	0	1	0	0
1415	Hcv1.av93.c1.g1416	c1	1416	1	0	0	1	0	1
1416	Hcv1.av93.c1.g1417	c1	1417	1	0	0	1	0	1
1417	Hcv1.av93.c1.g1418	c1	1418	1	0	0	1	0	1
1418	Hcv1.av93.c1.g1419	c1	1419	0	1	0	1	0	0
1419	Hcv1.av93.c1.g1420	c1	1420	1	0	0	1	0	1
1420	Hcv1.av93.c1.g1421	c1	1421	1	0	0	1	0	1
1421	Hcv1.av93.c1.g1422	c1	1422	1	0	0	1	0	0
1422	Hcv1.av93.c1.g1423	c1	1423	1	0	0	1	0	1
1423	Hcv1.av93.c1.g1424	c1	1424	1	0	0	1	0	1
1424	Hcv1.av93.c1.g1425	c1	1425	1	0	0	1	0	1
1425	Hcv1.av93.c1.g1426	c1	1426	1	0	0	1	0	1
1426	Hcv1.av93.c1.g1427	c1	1427	1	0	0	0	0	0
1427	Hcv1.av93.c1.g1428	c1	1428	1	0	0	1	0	1
1428	Hcv1.av93.c1.g1429	c1	1429	1	0	0	1	0	0
1429	Hcv1.av93.c1.g1430	c1	1430	1	0	0	1	0	0
1430	Hcv1.av93.c1.g1431	c1	1431	1	0	0	1	0	1
1431	Hcv1.av93.c1.g1432	c1	1432	1	0	0	1	0	0
1432	Hcv1.av93.c1.g1433	c1	1433	0	1	0	1	0	0
1433	Hcv1.av93.c1.g1434	c1	1434	1	0	0	1	0	1
1434	Hcv1.av93.c1.g1435	c1	1435	1	0	0	0	0	0
1435	Hcv1.av93.c1.g1436	c1	1436	1	0	0	1	0	1
1436	Hcv1.av93.c1.g1437	c1	1437	1	0	0	1	0	0
1437	Hcv1.av93.c1.g1438	c1	1438	1	0	0	1	0	1
1438	Hcv1.av93.c1.g1439	c1	1439	1	0	0	1	0	1
1439	Hcv1.av93.c1.g1440	c1	1440	1	0	0	1	0	0
1440	Hcv1.av93.c1.g1441	c1	1441	1	0	0	1	0	1
1441	Hcv1.av93.c1.g1442	c1	1442	1	0	0	1	0	1
1442	Hcv1.av93.c1.g1443	c1	1443	1	0	0	1	0	1
1443	Hcv1.av93.c1.g1444	c1	1444	1	0	0	1	0	1
1444	Hcv1.av93.c1.g1445	c1	1445	1	0	0	1	0	1
1445	Hcv1.av93.c1.g1446	c1	1446	1	0	0	1	1	0
1446	Hcv1.av93.c1.g1447	c1	1447	1	0	0	1	0	0
1447	Hcv1.av93.c1.g1448	c1	1448	1	0	0	1	0	1
1448	Hcv1.av93.c1.g1449	c1	1449	1	0	0	1	0	1
1449	Hcv1.av93.c1.g1450	c1	1450	1	0	0	1	0	1
1450	Hcv1.av93.c1.g1451	c1	1451	1	0	0	1	1	0
1451	Hcv1.av93.c1.g1452	c1	1452	1	0	0	1	0	0
1452	Hcv1.av93.c1.g1453	c1	1453	1	0	0	1	0	0
1453	Hcv1.av93.c1.g1454	c1	1454	1	0	0	1	0	0
1454	Hcv1.av93.c1.g1455	c1	1455	1	0	0	1	0	1
1455	Hcv1.av93.c1.g1456	c1	1456	1	0	0	1	0	1
1456	Hcv1.av93.c1.g1457	c1	1457	1	0	0	1	0	1
1457	Hcv1.av93.c1.g1458	c1	1458	1	0	0	1	0	1
1458	Hcv1.av93.c1.g1459	c1	1459	1	0	0	1	0	0
1459	Hcv1.av93.c1.g1460	c1	1460	1	0	0	1	0	1
1460	Hcv1.av93.c1.g1461	c1	1461	1	0	0	1	0	1
1461	Hcv1.av93.c1.g1462	c1	1462	1	0	0	1	0	1
1462	Hcv1.av93.c1.g1463	c1	1463	1	0	0	1	0	1
1463	Hcv1.av93.c1.g1464	c1	1464	1	0	0	1	0	0
1464	Hcv1.av93.c1.g1465	c1	1465	1	0	0	1	0	1
1465	Hcv1.av93.c1.g1466	c1	1466	1	0	0	1	0	1
1466	Hcv1.av93.c1.g1467	c1	1467	1	0	0	1	0	1
1467	Hcv1.av93.c1.g1468	c1	1468	1	0	0	1	0	1
1468	Hcv1.av93.c1.g1469	c1	1469	1	0	0	1	0	0
1469	Hcv1.av93.c1.g1470	c1	1470	1	0	0	1	0	1
1470	Hcv1.av93.c1.g1471	c1	1471	1	0	0	1	0	1
1471	Hcv1.av93.c1.g1472	c1	1472	1	0	0	1	0	0
1472	Hcv1.av93.c1.g1473	c1	1473	1	0	0	1	0	0
1473	Hcv1.av93.c1.g1474	c1	1474	1	0	0	1	0	1
1474	Hcv1.av93.c1.g1475	c1	1475	1	0	0	1	0	0
1475	Hcv1.av93.c1.g1476	c1	1476	1	0	0	1	0	1
1476	Hcv1.av93.c1.g1477	c1	1477	1	0	0	1	0	1
1477	Hcv1.av93.c1.g1478	c1	1478	1	0	0	1	0	1
1478	Hcv1.av93.c1.g1479	c1	1479	1	0	0	1	0	0
1479	Hcv1.av93.c1.g1480	c1	1480	1	0	0	1	0	1
1480	Hcv1.av93.c1.g1481	c1	1481	1	0	0	1	0	0
1481	Hcv1.av93.c1.g1482	c1	1482	1	0	0	1	0	1
1482	Hcv1.av93.c1.g1483	c1	1483	1	0	0	1	0	1
1483	Hcv1.av93.c1.g1484	c1	1484	0	1	0	1	1	1
1484	Hcv1.av93.c1.g1485	c1	1485	1	0	0	1	0	0
1485	Hcv1.av93.c1.g1486	c1	1486	1	0	0	1	0	1
1486	Hcv1.av93.c1.g1487	c1	1487	1	0	0	1	0	1
1487	Hcv1.av93.c1.g1488	c1	1488	1	0	0	1	0	1
1488	Hcv1.av93.c1.g1489	c1	1489	1	0	0	1	0	1
1489	Hcv1.av93.c1.g1490	c1	1490	1	0	0	1	0	1
1490	Hcv1.av93.c1.g1491	c1	1491	1	0	0	1	1	0
1491	Hcv1.av93.c1.g1492	c1	1492	1	0	0	1	0	1
1492	Hcv1.av93.c1.g1493	c1	1493	1	0	0	1	0	1
1493	Hcv1.av93.c1.g1494	c1	1494	1	0	0	1	0	1
1494	Hcv1.av93.c1.g1495	c1	1495	1	0	0	1	0	0
1495	Hcv1.av93.c1.g1496	c1	1496	1	0	0	1	0	1
1496	Hcv1.av93.c1.g1497	c1	1497	1	0	0	1	0	1
1497	Hcv1.av93.c1.g1498	c1	1498	1	0	0	1	0	1
1498	Hcv1.av93.c1.g1499	c1	1499	1	0	0	1	0	1
1499	Hcv1.av93.c1.g1500	c1	1500	1	0	0	1	0	0
1500	Hcv1.av93.c1.g1501	c1	1501	1	0	0	1	0	1
1501	Hcv1.av93.c1.g1502	c1	1502	1	0	0	1	0	0
1502	Hcv1.av93.c1.g1503	c1	1503	1	0	0	1	0	1
1503	Hcv1.av93.c1.g1504	c1	1504	1	0	0	1	0	1
1504	Hcv1.av93.c1.g1505	c1	1505	1	0	0	1	0	1
1505	Hcv1.av93.c1.g1506	c1	1506	1	0	0	1	0	0
1506	Hcv1.av93.c1.g1507	c1	1507	1	0	0	1	0	1
1507	Hcv1.av93.c1.g1508	c1	1508	1	0	0	1	0	1
1508	Hcv1.av93.c1.g1509	c1	1509	1	0	0	1	0	1
1509	Hcv1.av93.c1.g1510	c1	1510	1	0	0	1	0	1
1510	Hcv1.av93.c1.g1511	c1	1511	1	0	0	1	0	1
1511	Hcv1.av93.c1.g1512	c1	1512	1	0	0	1	0	0
1512	Hcv1.av93.c1.g1513	c1	1513	1	0	0	1	0	1
1513	Hcv1.av93.c1.g1514	c1	1514	1	0	0	1	0	1
1514	Hcv1.av93.c1.g1515	c1	1515	1	0	0	1	0	1
1515	Hcv1.av93.c1.g1516	c1	1516	1	0	0	1	0	0
1516	Hcv1.av93.c1.g1517	c1	1517	1	0	0	1	0	1
1517	Hcv1.av93.c1.g1518	c1	1518	1	0	0	1	0	0
1518	Hcv1.av93.c1.g1519	c1	1519	1	0	0	1	0	1
1519	Hcv1.av93.c1.g1520	c1	1520	1	0	0	1	0	1
1520	Hcv1.av93.c1.g1521	c1	1521	1	0	0	1	0	1
1521	Hcv1.av93.c1.g1522	c1	1522	0	1	0	1	0	0
1522	Hcv1.av93.c1.g1523	c1	1523	1	0	0	1	0	1
1523	Hcv1.av93.c1.g1524	c1	1524	1	0	0	1	0	0
1524	Hcv1.av93.c1.g1525	c1	1525	1	0	0	1	0	0
1525	Hcv1.av93.c1.g1526	c1	1526	1	0	0	1	0	1
1526	Hcv1.av93.c1.g1527	c1	1527	1	0	0	1	0	1
1527	Hcv1.av93.c1.g1528	c1	1528	1	0	0	1	0	0
1528	Hcv1.av93.c1.g1529	c1	1529	1	0	0	1	0	1
1529	Hcv1.av93.c1.g1530	c1	1530	1	0	0	1	0	0
1530	Hcv1.av93.c1.g1531	c1	1531	1	0	0	1	0	1
1531	Hcv1.av93.c1.g1532	c1	1532	1	0	0	1	0	0
1532	Hcv1.av93.c1.g1533	c1	1533	1	0	0	1	0	1
1533	Hcv1.av93.c1.g1534	c1	1534	1	0	0	1	0	1
1534	Hcv1.av93.c1.g1535	c1	1535	1	0	0	1	0	1
1535	Hcv1.av93.c1.g1536	c1	1536	0	1	0	1	0	0
1536	Hcv1.av93.c1.g1537	c1	1537	1	0	0	1	0	0
1537	Hcv1.av93.c1.g1538	c1	1538	1	0	0	1	0	0
1538	Hcv1.av93.c1.g1539	c1	1539	1	0	0	1	0	0
1539	Hcv1.av93.c1.g1540	c1	1540	0	1	0	1	0	0
1540	Hcv1.av93.c1.g1541	c1	1541	0	1	0	1	0	0
1541	Hcv1.av93.c1.g1542	c1	1542	0	1	0	1	0	1
1542	Hcv1.av93.c1.g1543	c1	1543	1	0	0	1	0	1
1543	Hcv1.av93.c1.g1544	c1	1544	0	1	0	1	0	1
1544	Hcv1.av93.c1.g1545	c1	1545	1	0	0	1	0	1
1545	Hcv1.av93.c1.g1546	c1	1546	0	1	0	1	0	1
1546	Hcv1.av93.c1.g1547	c1	1547	1	0	0	1	1	0
1547	Hcv1.av93.c1.g1548	c1	1548	1	0	0	1	0	1
1548	Hcv1.av93.c1.g1549	c1	1549	1	0	0	1	0	1
1549	Hcv1.av93.c1.g1550	c1	1550	1	0	0	1	0	1
1550	Hcv1.av93.c1.g1551	c1	1551	1	0	0	1	0	1
1551	Hcv1.av93.c1.g1552	c1	1552	1	0	0	1	1	0
1552	Hcv1.av93.c1.g1553	c1	1553	1	0	0	1	0	0
1553	Hcv1.av93.c1.g1554	c1	1554	1	0	0	1	0	0
1554	Hcv1.av93.c1.g1555	c1	1555	1	0	0	1	0	0
1555	Hcv1.av93.c1.g1556	c1	1556	1	0	0	1	0	1
1556	Hcv1.av93.c1.g1557	c1	1557	1	0	0	1	0	1
1557	Hcv1.av93.c1.g1558	c1	1558	1	0	0	1	0	0
1558	Hcv1.av93.c1.g1559	c1	1559	1	0	0	1	0	1
1559	Hcv1.av93.c1.g1560	c1	1560	1	0	0	1	0	1
1560	Hcv1.av93.c1.g1561	c1	1561	1	0	0	1	0	1
1561	Hcv1.av93.c1.g1562	c1	1562	1	0	0	1	0	1
1562	Hcv1.av93.c1.g1563	c1	1563	1	0	0	1	0	1
1563	Hcv1.av93.c1.g1564	c1	1564	1	0	0	1	0	0
1564	Hcv1.av93.c1.g1565	c1	1565	1	0	0	1	0	1
1565	Hcv1.av93.c1.g1566	c1	1566	1	0	0	1	0	1
1566	Hcv1.av93.c1.g1567	c1	1567	1	0	0	1	0	1
1567	Hcv1.av93.c1.g1568	c1	1568	1	0	0	1	0	0
1568	Hcv1.av93.c1.g1569	c1	1569	1	0	0	1	0	1
1569	Hcv1.av93.c1.g1570	c1	1570	1	0	0	1	0	0
1570	Hcv1.av93.c1.g1571	c1	1571	1	0	0	1	0	1
1571	Hcv1.av93.c1.g1572	c1	1572	1	0	0	1	0	1
1572	Hcv1.av93.c1.g1573	c1	1573	1	0	0	1	0	1
1573	Hcv1.av93.c1.g1574	c1	1574	1	0	0	1	0	1
1574	Hcv1.av93.c1.g1575	c1	1575	0	1	0	1	0	1
1575	Hcv1.av93.c1.g1576	c1	1576	1	0	0	1	0	1
1576	Hcv1.av93.c1.g1577	c1	1577	1	0	0	1	0	0
1577	Hcv1.av93.c1.g1578	c1	1578	1	0	0	1	0	1
1578	Hcv1.av93.c1.g1579	c1	1579	1	0	0	1	0	1
1579	Hcv1.av93.c1.g1580	c1	1580	0	1	0	1	0	1
1580	Hcv1.av93.c1.g1581	c1	1581	1	0	0	1	0	1
1581	Hcv1.av93.c1.g1582	c1	1582	1	0	0	1	0	1
1582	Hcv1.av93.c1.g1583	c1	1583	1	0	0	1	0	1
1583	Hcv1.av93.c1.g1584	c1	1584	1	0	0	1	0	1
1584	Hcv1.av93.c1.g1585	c1	1585	1	0	0	1	0	1
1585	Hcv1.av93.c1.g1586	c1	1586	1	0	0	1	0	1
1586	Hcv1.av93.c1.g1587	c1	1587	1	0	0	1	0	1
1587	Hcv1.av93.c1.g1588	c1	1588	1	0	0	1	0	1
1588	Hcv1.av93.c1.g1589	c1	1589	1	0	0	1	0	1
1589	Hcv1.av93.c1.g1590	c1	1590	1	0	0	1	0	0
1590	Hcv1.av93.c1.g1591	c1	1591	1	0	0	1	0	0
1591	Hcv1.av93.c1.g1592	c1	1592	0	1	0	1	0	0
1592	Hcv1.av93.c1.g1593	c1	1593	1	0	0	1	0	0
1593	Hcv1.av93.c1.g1594	c1	1594	1	0	0	1	0	0
1594	Hcv1.av93.c1.g1595	c1	1595	1	0	0	1	0	0
1595	Hcv1.av93.c1.g1596	c1	1596	1	0	0	1	0	0
1596	Hcv1.av93.c1.g1597	c1	1597	1	0	0	1	0	1
1597	Hcv1.av93.c1.g1598	c1	1598	1	0	0	1	0	1
1598	Hcv1.av93.c1.g1599	c1	1599	1	0	0	1	0	1
1599	Hcv1.av93.c1.g1600	c1	1600	1	0	0	1	0	1
1600	Hcv1.av93.c1.g1601	c1	1601	1	0	0	1	0	0
1601	Hcv1.av93.c1.g1602	c1	1602	0	1	0	1	0	1
1602	Hcv1.av93.c1.g1603	c1	1603	0	1	0	1	0	0
1603	Hcv1.av93.c1.g1604	c1	1604	1	0	0	1	0	1
1604	Hcv1.av93.c1.g1605	c1	1605	1	0	0	1	0	1
1605	Hcv1.av93.c1.g1606	c1	1606	1	0	0	1	0	1
1606	Hcv1.av93.c1.g1607	c1	1607	1	0	0	1	0	0
1607	Hcv1.av93.c1.g1608	c1	1608	1	0	0	1	0	1
1608	Hcv1.av93.c1.g1609	c1	1609	1	0	0	1	1	0
1609	Hcv1.av93.c1.g1610	c1	1610	1	0	0	1	0	1
1610	Hcv1.av93.c1.g1611	c1	1611	1	0	0	1	0	0
1611	Hcv1.av93.c1.g1612	c1	1612	1	0	0	1	0	1
1612	Hcv1.av93.c1.g1613	c1	1613	1	0	0	1	0	0
1613	Hcv1.av93.c1.g1614	c1	1614	1	0	0	1	0	0
1614	Hcv1.av93.c1.g1615	c1	1615	1	0	0	0	0	0
1615	Hcv1.av93.c1.g1616	c1	1616	1	0	0	0	0	0
1616	Hcv1.av93.c1.g1617	c1	1617	1	0	0	1	0	1
1617	Hcv1.av93.c1.g1618	c1	1618	1	0	0	1	0	1
1618	Hcv1.av93.c1.g1619	c1	1619	1	0	0	1	0	1
1619	Hcv1.av93.c1.g1620	c1	1620	1	0	0	1	0	1
1620	Hcv1.av93.c1.g1621	c1	1621	1	0	0	1	0	0
1621	Hcv1.av93.c1.g1622	c1	1622	1	0	0	1	0	0
1622	Hcv1.av93.c1.g1623	c1	1623	1	0	0	1	0	1
1623	Hcv1.av93.c1.g1624	c1	1624	1	0	0	1	0	0
1624	Hcv1.av93.c1.g1625	c1	1625	1	0	0	1	0	0
1625	Hcv1.av93.c1.g1626	c1	1626	1	0	0	1	0	0
1626	Hcv1.av93.c1.g1627	c1	1627	1	0	0	1	0	1
1627	Hcv1.av93.c1.g1628	c1	1628	1	0	0	1	0	1
1628	Hcv1.av93.c1.g1629	c1	1629	0	1	0	1	0	0
1629	Hcv1.av93.c1.g1630	c1	1630	0	1	0	1	0	1
1630	Hcv1.av93.c1.g1631	c1	1631	1	0	0	1	0	1
1631	Hcv1.av93.c1.g1632	c1	1632	1	0	0	1	0	1
1632	Hcv1.av93.c1.g1633	c1	1633	1	0	0	1	0	1
1633	Hcv1.av93.c1.g1634	c1	1634	1	0	0	1	0	1
1634	Hcv1.av93.c1.g1635	c1	1635	0	1	0	1	0	1
1635	Hcv1.av93.c1.g1636	c1	1636	0	1	0	1	0	1
1636	Hcv1.av93.c1.g1637	c1	1637	1	0	0	1	0	1
1637	Hcv1.av93.c1.g1638	c1	1638	1	0	0	1	0	0
1638	Hcv1.av93.c1.g1639	c1	1639	1	0	0	1	0	1
1639	Hcv1.av93.c1.g1640	c1	1640	1	0	0	1	0	1
1640	Hcv1.av93.c1.g1641	c1	1641	1	0	0	1	0	0
1641	Hcv1.av93.c1.g1642	c1	1642	0	1	0	0	0	0
1642	Hcv1.av93.c1.g1643	c1	1643	0	1	0	1	0	1
1643	Hcv1.av93.c1.g1644	c1	1644	1	0	0	1	0	0
1644	Hcv1.av93.c1.g1645	c1	1645	1	0	0	1	1	0
1645	Hcv1.av93.c1.g1646	c1	1646	0	0	1	1	0	0
1646	Hcv1.av93.c1.g1647	c1	1647	0	1	0	1	0	1
1647	Hcv1.av93.c1.g1648	c1	1648	1	0	0	1	0	1
1648	Hcv1.av93.c1.g1649	c1	1649	0	1	0	1	0	1
1649	Hcv1.av93.c1.g1650	c1	1650	0	1	0	1	0	1
1650	Hcv1.av93.c1.g1651	c1	1651	0	1	0	1	0	1
1651	Hcv1.av93.c1.g1652	c1	1652	1	0	0	1	0	1
1652	Hcv1.av93.c1.g1653	c1	1653	1	0	0	1	0	1
1653	Hcv1.av93.c1.g1654	c1	1654	1	0	0	1	0	0
1654	Hcv1.av93.c1.g1655	c1	1655	1	0	0	1	0	1
1655	Hcv1.av93.c1.g1656	c1	1656	0	1	0	1	0	0
1656	Hcv1.av93.c1.g1657	c1	1657	1	0	0	1	0	1
1657	Hcv1.av93.c1.g1658	c1	1658	1	0	0	1	1	0
1658	Hcv1.av93.c1.g1659	c1	1659	1	0	0	1	0	1
1659	Hcv1.av93.c1.g1660	c1	1660	1	0	0	1	0	1
1660	Hcv1.av93.c1.g1661	c1	1661	1	0	0	1	0	0
1661	Hcv1.av93.c1.g1662	c1	1662	1	0	0	1	0	1
1662	Hcv1.av93.c1.g1663	c1	1663	1	0	0	1	0	1
1663	Hcv1.av93.c1.g1664	c1	1664	1	0	0	1	0	1
1664	Hcv1.av93.c1.g1665	c1	1665	1	0	0	1	0	1
1665	Hcv1.av93.c1.g1666	c1	1666	1	0	0	1	0	1
1666	Hcv1.av93.c1.g1667	c1	1667	1	0	0	1	1	1
1667	Hcv1.av93.c1.g1668	c1	1668	0	1	0	0	0	0
1668	Hcv1.av93.c1.g1669	c1	1669	1	0	0	1	0	0
1669	Hcv1.av93.c1.g1670	c1	1670	1	0	0	0	0	0
1670	Hcv1.av93.c1.g1671	c1	1671	1	0	0	1	0	0
1671	Hcv1.av93.c1.g1672	c1	1672	1	0	0	1	1	0
1672	Hcv1.av93.c1.g1673	c1	1673	1	0	0	1	0	1
1673	Hcv1.av93.c1.g1674	c1	1674	1	0	0	1	0	0
1674	Hcv1.av93.c1.g1675	c1	1675	1	0	0	1	0	0
1675	Hcv1.av93.c1.g1676	c1	1676	1	0	0	1	0	0
1676	Hcv1.av93.c1.g1677	c1	1677	1	0	0	1	0	1
1677	Hcv1.av93.c1.g1678	c1	1678	1	0	0	1	0	1
1678	Hcv1.av93.c1.g1679	c1	1679	0	1	0	1	0	0
1679	Hcv1.av93.c1.g1680	c1	1680	1	0	0	1	0	0
1680	Hcv1.av93.c1.g1681	c1	1681	1	0	0	1	0	1
1681	Hcv1.av93.c1.g1682	c1	1682	1	0	0	1	0	1
1682	Hcv1.av93.c1.g1683	c1	1683	1	0	0	1	0	1
1683	Hcv1.av93.c1.g1684	c1	1684	1	0	0	1	0	1
1684	Hcv1.av93.c1.g1685	c1	1685	1	0	0	1	0	1
1685	Hcv1.av93.c1.g1686	c1	1686	1	0	0	1	0	1
1686	Hcv1.av93.c1.g1687	c1	1687	0	0	1	1	0	1
1687	Hcv1.av93.c1.g1688	c1	1688	1	0	0	1	0	1
1688	Hcv1.av93.c1.g1689	c1	1689	1	0	0	1	0	1
1689	Hcv1.av93.c1.g1690	c1	1690	0	1	0	1	0	1
1690	Hcv1.av93.c1.g1691	c1	1691	0	1	0	1	0	0
1691	Hcv1.av93.c1.g1692	c1	1692	1	0	0	1	0	1
1692	Hcv1.av93.c1.g1693	c1	1693	1	0	0	1	0	1
1693	Hcv1.av93.c1.g1694	c1	1694	0	1	0	1	0	1
1694	Hcv1.av93.c1.g1695	c1	1695	1	0	0	1	0	1
1695	Hcv1.av93.c1.g1696	c1	1696	1	0	0	1	0	1
1696	Hcv1.av93.c1.g1697	c1	1697	1	0	0	1	0	0
1697	Hcv1.av93.c1.g1698	c1	1698	1	0	0	1	0	0
1698	Hcv1.av93.c1.g1699	c1	1699	1	0	0	1	0	1
1699	Hcv1.av93.c1.g1700	c1	1700	1	0	0	1	0	1
1700	Hcv1.av93.c1.g1701	c1	1701	1	0	0	1	0	1
1701	Hcv1.av93.c1.g1702	c1	1702	1	0	0	1	0	0
1702	Hcv1.av93.c1.g1703	c1	1703	1	0	0	1	0	1
1703	Hcv1.av93.c1.g1704	c1	1704	1	0	0	1	0	0
1704	Hcv1.av93.c1.g1705	c1	1705	1	0	0	0	0	0
1705	Hcv1.av93.c1.g1706	c1	1706	1	0	0	1	0	1
1706	Hcv1.av93.c1.g1707	c1	1707	1	0	0	1	0	0
1707	Hcv1.av93.c1.g1708	c1	1708	1	0	0	1	0	0
1708	Hcv1.av93.c1.g1709	c1	1709	1	0	0	0	0	0
1709	Hcv1.av93.c1.g1710	c1	1710	1	0	0	1	0	1
1710	Hcv1.av93.c1.g1711	c1	1711	1	0	0	1	0	1
1711	Hcv1.av93.c1.g1712	c1	1712	1	0	0	1	0	1
1712	Hcv1.av93.c1.g1713	c1	1713	1	0	0	1	0	1
1713	Hcv1.av93.c1.g1714	c1	1714	1	0	0	1	0	1
1714	Hcv1.av93.c1.g1715	c1	1715	1	0	0	1	0	1
1715	Hcv1.av93.c1.g1716	c1	1716	1	0	0	1	0	0
1716	Hcv1.av93.c1.g1717	c1	1717	1	0	0	1	0	0
1717	Hcv1.av93.c1.g1718	c1	1718	1	0	0	1	0	0
1718	Hcv1.av93.c1.g1719	c1	1719	1	0	0	1	0	0
1719	Hcv1.av93.c1.g1720	c1	1720	1	0	0	1	0	0
1720	Hcv1.av93.c1.g1721	c1	1721	1	0	0	1	0	0
1721	Hcv1.av93.c1.g1722	c1	1722	1	0	0	1	0	1
1722	Hcv1.av93.c1.g1723	c1	1723	1	0	0	1	0	0
1723	Hcv1.av93.c1.g1724	c1	1724	1	0	0	1	0	1
1724	Hcv1.av93.c1.g1725	c1	1725	1	0	0	1	0	0
1725	Hcv1.av93.c1.g1726	c1	1726	1	0	0	1	0	1
1726	Hcv1.av93.c1.g1727	c1	1727	1	0	0	1	0	1
1727	Hcv1.av93.c1.g1728	c1	1728	1	0	0	1	0	0
1728	Hcv1.av93.c10.g1	c10	1	1	0	0	1	0	1
1729	Hcv1.av93.c10.g2	c10	2	0	1	0	1	0	1
1730	Hcv1.av93.c10.g3	c10	3	1	0	0	1	0	1
1731	Hcv1.av93.c10.g4	c10	4	1	0	0	1	0	1
1732	Hcv1.av93.c10.g5	c10	5	1	0	0	1	0	1
1733	Hcv1.av93.c10.g6	c10	6	1	0	0	1	0	1
1734	Hcv1.av93.c10.g7	c10	7	1	0	0	1	0	1
1735	Hcv1.av93.c10.g8	c10	8	1	0	0	1	0	0
1736	Hcv1.av93.c10.g9	c10	9	1	0	0	1	0	0
1737	Hcv1.av93.c10.g10	c10	10	1	0	0	1	0	1
1738	Hcv1.av93.c10.g11	c10	11	1	0	0	1	0	1
1739	Hcv1.av93.c10.g12	c10	12	1	0	0	1	0	0
1740	Hcv1.av93.c10.g13	c10	13	1	0	0	1	0	1
1741	Hcv1.av93.c10.g14	c10	14	1	0	0	1	0	1
1742	Hcv1.av93.c10.g15	c10	15	1	0	0	1	0	1
1743	Hcv1.av93.c10.g16	c10	16	1	0	0	1	0	0
1744	Hcv1.av93.c10.g17	c10	17	1	0	0	1	0	0
1745	Hcv1.av93.c10.g18	c10	18	1	0	0	1	0	1
1746	Hcv1.av93.c10.g19	c10	19	1	0	0	1	0	1
1747	Hcv1.av93.c10.g20	c10	20	0	1	0	1	0	1
1748	Hcv1.av93.c10.g21	c10	21	1	0	0	1	0	1
1749	Hcv1.av93.c10.g22	c10	22	1	0	0	1	0	0
1750	Hcv1.av93.c10.g23	c10	23	1	0	0	1	0	0
1751	Hcv1.av93.c10.g24	c10	24	1	0	0	1	0	0
1752	Hcv1.av93.c10.g25	c10	25	1	0	0	1	0	1
1753	Hcv1.av93.c10.g26	c10	26	1	0	0	1	0	0
1754	Hcv1.av93.c10.g27	c10	27	1	0	0	1	0	1
1755	Hcv1.av93.c10.g28	c10	28	1	0	0	1	1	0
1756	Hcv1.av93.c10.g29	c10	29	1	0	0	1	0	0
1757	Hcv1.av93.c10.g30	c10	30	1	0	0	1	0	1
1758	Hcv1.av93.c10.g31	c10	31	1	0	0	1	0	1
1759	Hcv1.av93.c10.g32	c10	32	1	0	0	1	0	0
1760	Hcv1.av93.c10.g33	c10	33	1	0	0	1	0	0
1761	Hcv1.av93.c10.g34	c10	34	1	0	0	1	0	1
1762	Hcv1.av93.c10.g35	c10	35	1	0	0	1	0	0
1763	Hcv1.av93.c10.g36	c10	36	1	0	0	1	0	0
1764	Hcv1.av93.c10.g37	c10	37	1	0	0	1	0	0
1765	Hcv1.av93.c10.g38	c10	38	1	0	0	1	0	1
1766	Hcv1.av93.c10.g39	c10	39	1	0	0	1	0	1
1767	Hcv1.av93.c10.g40	c10	40	1	0	0	1	0	1
1768	Hcv1.av93.c10.g41	c10	41	1	0	0	1	0	1
1769	Hcv1.av93.c10.g42	c10	42	1	0	0	1	0	1
1770	Hcv1.av93.c10.g43	c10	43	1	0	0	1	0	1
1771	Hcv1.av93.c10.g44	c10	44	1	0	0	1	0	0
1772	Hcv1.av93.c10.g45	c10	45	1	0	0	1	0	1
1773	Hcv1.av93.c10.g46	c10	46	1	0	0	1	0	1
1774	Hcv1.av93.c10.g47	c10	47	1	0	0	1	0	1
1775	Hcv1.av93.c10.g48	c10	48	1	0	0	1	0	1
1776	Hcv1.av93.c10.g49	c10	49	1	0	0	1	0	1
1777	Hcv1.av93.c10.g50	c10	50	1	0	0	1	0	1
1778	Hcv1.av93.c10.g51	c10	51	1	0	0	1	0	1
1779	Hcv1.av93.c10.g52	c10	52	1	0	0	1	0	1
1780	Hcv1.av93.c10.g53	c10	53	1	0	0	1	0	0
1781	Hcv1.av93.c10.g54	c10	54	1	0	0	1	0	1
1782	Hcv1.av93.c10.g55	c10	55	1	0	0	1	0	0
1783	Hcv1.av93.c10.g56	c10	56	1	0	0	1	0	1
1784	Hcv1.av93.c10.g57	c10	57	1	0	0	1	0	0
1785	Hcv1.av93.c10.g58	c10	58	1	0	0	1	0	1
1786	Hcv1.av93.c10.g59	c10	59	1	0	0	1	0	1
1787	Hcv1.av93.c10.g60	c10	60	1	0	0	1	0	1
1788	Hcv1.av93.c10.g61	c10	61	1	0	0	1	0	1
1789	Hcv1.av93.c10.g62	c10	62	1	0	0	1	0	0
1790	Hcv1.av93.c10.g63	c10	63	1	0	0	1	0	0
1791	Hcv1.av93.c10.g64	c10	64	1	0	0	1	0	1
1792	Hcv1.av93.c10.g65	c10	65	0	1	0	1	0	0
1793	Hcv1.av93.c10.g66	c10	66	1	0	0	1	0	1
1794	Hcv1.av93.c10.g67	c10	67	1	0	0	1	0	0
1795	Hcv1.av93.c10.g68	c10	68	1	0	0	1	0	1
1796	Hcv1.av93.c10.g69	c10	69	1	0	0	1	0	1
1797	Hcv1.av93.c10.g70	c10	70	1	0	0	1	0	1
1798	Hcv1.av93.c10.g71	c10	71	1	0	0	1	0	0
1799	Hcv1.av93.c10.g72	c10	72	1	0	0	1	0	1
1800	Hcv1.av93.c10.g73	c10	73	1	0	0	1	0	1
1801	Hcv1.av93.c10.g74	c10	74	1	0	0	1	0	1
1802	Hcv1.av93.c10.g75	c10	75	1	0	0	1	0	0
1803	Hcv1.av93.c10.g76	c10	76	1	0	0	1	0	1
1804	Hcv1.av93.c10.g77	c10	77	1	0	0	1	0	1
1805	Hcv1.av93.c10.g78	c10	78	1	0	0	1	0	1
1806	Hcv1.av93.c10.g79	c10	79	1	0	0	1	0	1
1807	Hcv1.av93.c10.g80	c10	80	1	0	0	1	0	1
1808	Hcv1.av93.c10.g81	c10	81	1	0	0	1	0	0
1809	Hcv1.av93.c10.g82	c10	82	1	0	0	1	0	1
1810	Hcv1.av93.c10.g83	c10	83	1	0	0	1	0	1
1811	Hcv1.av93.c10.g84	c10	84	1	0	0	1	0	0
1812	Hcv1.av93.c10.g85	c10	85	1	0	0	1	0	1
1813	Hcv1.av93.c10.g86	c10	86	1	0	0	1	0	1
1814	Hcv1.av93.c10.g87	c10	87	1	0	0	1	0	1
1815	Hcv1.av93.c10.g88	c10	88	1	0	0	1	0	1
1816	Hcv1.av93.c10.g89	c10	89	1	0	0	1	0	0
1817	Hcv1.av93.c10.g90	c10	90	1	0	0	1	0	0
1818	Hcv1.av93.c10.g91	c10	91	1	0	0	1	0	0
1819	Hcv1.av93.c10.g92	c10	92	1	0	0	1	0	1
1820	Hcv1.av93.c10.g93	c10	93	1	0	0	1	0	0
1821	Hcv1.av93.c10.g94	c10	94	1	0	0	1	1	1
1822	Hcv1.av93.c10.g95	c10	95	1	0	0	1	0	0
1823	Hcv1.av93.c10.g96	c10	96	1	0	0	1	0	0
1824	Hcv1.av93.c10.g97	c10	97	1	0	0	1	0	1
1825	Hcv1.av93.c10.g98	c10	98	1	0	0	1	0	1
1826	Hcv1.av93.c10.g99	c10	99	1	0	0	1	0	0
1827	Hcv1.av93.c10.g100	c10	100	1	0	0	1	0	1
1828	Hcv1.av93.c10.g101	c10	101	1	0	0	1	0	1
1829	Hcv1.av93.c10.g102	c10	102	1	0	0	1	1	0
1830	Hcv1.av93.c10.g103	c10	103	1	0	0	1	0	1
1831	Hcv1.av93.c10.g104	c10	104	1	0	0	1	0	0
1832	Hcv1.av93.c10.g105	c10	105	1	0	0	1	0	1
1833	Hcv1.av93.c10.g106	c10	106	1	0	0	1	0	1
1834	Hcv1.av93.c10.g107	c10	107	1	0	0	1	0	1
1835	Hcv1.av93.c10.g108	c10	108	1	0	0	1	0	1
1836	Hcv1.av93.c10.g109	c10	109	1	0	0	1	1	1
1837	Hcv1.av93.c10.g110	c10	110	1	0	0	1	1	0
1838	Hcv1.av93.c10.g111	c10	111	1	0	0	1	0	1
1839	Hcv1.av93.c10.g112	c10	112	1	0	0	1	0	1
1840	Hcv1.av93.c10.g113	c10	113	1	0	0	1	0	1
1841	Hcv1.av93.c10.g114	c10	114	1	0	0	1	0	0
1842	Hcv1.av93.c10.g115	c10	115	1	0	0	1	0	0
1843	Hcv1.av93.c10.g116	c10	116	1	0	0	1	0	0
1844	Hcv1.av93.c10.g117	c10	117	1	0	0	1	0	1
1845	Hcv1.av93.c10.g118	c10	118	1	0	0	1	0	0
1846	Hcv1.av93.c10.g119	c10	119	1	0	0	1	0	1
1847	Hcv1.av93.c10.g120	c10	120	1	0	0	1	1	0
1848	Hcv1.av93.c10.g121	c10	121	1	0	0	1	0	1
1849	Hcv1.av93.c10.g122	c10	122	1	0	0	1	0	1
1850	Hcv1.av93.c10.g123	c10	123	1	0	0	1	0	1
1851	Hcv1.av93.c10.g124	c10	124	1	0	0	1	0	1
1852	Hcv1.av93.c10.g125	c10	125	1	0	0	1	0	1
1853	Hcv1.av93.c10.g126	c10	126	1	0	0	1	0	1
1854	Hcv1.av93.c10.g127	c10	127	1	0	0	1	0	1
1855	Hcv1.av93.c10.g128	c10	128	1	0	0	1	0	1
1856	Hcv1.av93.c10.g129	c10	129	1	0	0	1	0	1
1857	Hcv1.av93.c10.g130	c10	130	1	0	0	1	0	1
1858	Hcv1.av93.c10.g131	c10	131	1	0	0	1	1	0
1859	Hcv1.av93.c10.g132	c10	132	1	0	0	1	0	1
1860	Hcv1.av93.c10.g133	c10	133	1	0	0	1	0	1
1861	Hcv1.av93.c10.g134	c10	134	1	0	0	1	0	1
1862	Hcv1.av93.c10.g135	c10	135	1	0	0	1	0	1
1863	Hcv1.av93.c10.g136	c10	136	0	1	0	0	0	0
1864	Hcv1.av93.c10.g137	c10	137	0	1	0	1	1	0
1865	Hcv1.av93.c10.g138	c10	138	1	0	0	1	0	1
1866	Hcv1.av93.c10.g139	c10	139	1	0	0	1	0	1
1867	Hcv1.av93.c10.g140	c10	140	1	0	0	1	0	0
1868	Hcv1.av93.c10.g141	c10	141	1	0	0	1	0	1
1869	Hcv1.av93.c10.g142	c10	142	1	0	0	1	0	0
1870	Hcv1.av93.c10.g143	c10	143	1	0	0	1	0	1
1871	Hcv1.av93.c10.g144	c10	144	1	0	0	1	0	1
1872	Hcv1.av93.c10.g145	c10	145	1	0	0	1	1	0
1873	Hcv1.av93.c10.g146	c10	146	1	0	0	1	0	1
1874	Hcv1.av93.c10.g147	c10	147	0	1	0	1	0	1
1875	Hcv1.av93.c10.g148	c10	148	1	0	0	1	1	0
1876	Hcv1.av93.c10.g149	c10	149	1	0	0	1	0	1
1877	Hcv1.av93.c10.g150	c10	150	1	0	0	1	1	0
1878	Hcv1.av93.c10.g151	c10	151	1	0	0	1	0	1
1879	Hcv1.av93.c10.g152	c10	152	0	1	0	1	0	0
1880	Hcv1.av93.c10.g153	c10	153	1	0	0	1	0	1
1881	Hcv1.av93.c10.g154	c10	154	1	0	0	1	0	1
1882	Hcv1.av93.c10.g155	c10	155	1	0	0	1	0	1
1883	Hcv1.av93.c10.g156	c10	156	0	1	0	1	0	1
1884	Hcv1.av93.c10.g157	c10	157	1	0	0	1	0	0
1885	Hcv1.av93.c10.g158	c10	158	1	0	0	1	0	0
1886	Hcv1.av93.c10.g159	c10	159	1	0	0	1	0	0
1887	Hcv1.av93.c10.g160	c10	160	1	0	0	1	0	1
1888	Hcv1.av93.c10.g161	c10	161	1	0	0	1	0	1
1889	Hcv1.av93.c10.g162	c10	162	1	0	0	1	0	1
1890	Hcv1.av93.c10.g163	c10	163	1	0	0	1	0	1
1891	Hcv1.av93.c10.g164	c10	164	1	0	0	1	0	0
1892	Hcv1.av93.c10.g165	c10	165	1	0	0	1	0	1
1893	Hcv1.av93.c10.g166	c10	166	1	0	0	1	0	0
1894	Hcv1.av93.c10.g167	c10	167	1	0	0	1	0	0
1895	Hcv1.av93.c10.g168	c10	168	1	0	0	1	0	1
1896	Hcv1.av93.c10.g169	c10	169	0	1	0	1	0	0
1897	Hcv1.av93.c10.g170	c10	170	1	0	0	1	0	1
1898	Hcv1.av93.c10.g171	c10	171	1	0	0	1	0	1
1899	Hcv1.av93.c10.g172	c10	172	0	1	0	1	0	1
1900	Hcv1.av93.c10.g173	c10	173	1	0	0	0	0	0
1901	Hcv1.av93.c10.g174	c10	174	1	0	0	1	0	1
1902	Hcv1.av93.c10.g175	c10	175	1	0	0	1	0	0
1903	Hcv1.av93.c10.g176	c10	176	1	0	0	1	0	0
1904	Hcv1.av93.c10.g177	c10	177	1	0	0	1	0	0
1905	Hcv1.av93.c10.g178	c10	178	1	0	0	0	0	0
1906	Hcv1.av93.c10.g179	c10	179	1	0	0	1	0	1
1907	Hcv1.av93.c10.g180	c10	180	1	0	0	1	1	1
1908	Hcv1.av93.c10.g181	c10	181	1	0	0	1	0	1
1909	Hcv1.av93.c10.g182	c10	182	1	0	0	1	0	1
1910	Hcv1.av93.c10.g183	c10	183	0	1	0	1	0	1
1911	Hcv1.av93.c10.g184	c10	184	0	1	0	1	0	1
1912	Hcv1.av93.c10.g185	c10	185	1	0	0	1	0	1
1913	Hcv1.av93.c10.g186	c10	186	0	1	0	1	0	0
1914	Hcv1.av93.c10.g187	c10	187	0	1	0	0	0	0
1915	Hcv1.av93.c10.g188	c10	188	1	0	0	1	0	1
1916	Hcv1.av93.c10.g189	c10	189	1	0	0	1	0	1
1917	Hcv1.av93.c10.g190	c10	190	1	0	0	1	0	0
1918	Hcv1.av93.c10.g191	c10	191	1	0	0	1	0	1
1919	Hcv1.av93.c10.g192	c10	192	1	0	0	1	0	1
1920	Hcv1.av93.c10.g193	c10	193	1	0	0	1	0	0
1921	Hcv1.av93.c10.g194	c10	194	0	1	0	1	0	0
1922	Hcv1.av93.c10.g195	c10	195	1	0	0	1	0	1
1923	Hcv1.av93.c10.g196	c10	196	1	0	0	1	0	0
1924	Hcv1.av93.c10.g197	c10	197	1	0	0	1	0	0
1925	Hcv1.av93.c10.g198	c10	198	1	0	0	1	0	1
1926	Hcv1.av93.c10.g199	c10	199	1	0	0	1	0	1
1927	Hcv1.av93.c10.g200	c10	200	1	0	0	1	0	0
1928	Hcv1.av93.c10.g201	c10	201	0	1	0	1	0	0
1929	Hcv1.av93.c10.g202	c10	202	0	1	0	1	0	0
1930	Hcv1.av93.c10.g203	c10	203	1	0	0	1	0	1
1931	Hcv1.av93.c10.g204	c10	204	1	0	0	1	0	0
1932	Hcv1.av93.c10.g205	c10	205	1	0	0	1	0	1
1933	Hcv1.av93.c10.g206	c10	206	1	0	0	1	1	0
1934	Hcv1.av93.c10.g207	c10	207	1	0	0	1	0	1
1935	Hcv1.av93.c10.g208	c10	208	1	0	0	1	0	1
1936	Hcv1.av93.c10.g209	c10	209	1	0	0	1	0	1
1937	Hcv1.av93.c10.g210	c10	210	1	0	0	1	0	1
1938	Hcv1.av93.c10.g211	c10	211	0	1	0	1	0	1
1939	Hcv1.av93.c10.g212	c10	212	1	0	0	1	0	1
1940	Hcv1.av93.c10.g213	c10	213	0	0	1	1	0	0
1941	Hcv1.av93.c10.g214	c10	214	1	0	0	1	0	1
1942	Hcv1.av93.c10.g215	c10	215	1	0	0	1	0	0
1943	Hcv1.av93.c10.g216	c10	216	1	0	0	1	1	0
1944	Hcv1.av93.c10.g217	c10	217	1	0	0	1	0	0
1945	Hcv1.av93.c10.g218	c10	218	1	0	0	1	1	1
1946	Hcv1.av93.c10.g219	c10	219	1	0	0	1	0	0
1947	Hcv1.av93.c10.g220	c10	220	1	0	0	1	0	1
1948	Hcv1.av93.c10.g221	c10	221	1	0	0	1	0	1
1949	Hcv1.av93.c10.g222	c10	222	0	1	0	1	0	1
1950	Hcv1.av93.c10.g223	c10	223	0	1	0	1	0	0
1951	Hcv1.av93.c10.g224	c10	224	1	0	0	1	0	0
1952	Hcv1.av93.c10.g225	c10	225	1	0	0	1	0	1
1953	Hcv1.av93.c10.g226	c10	226	1	0	0	1	0	0
1954	Hcv1.av93.c10.g227	c10	227	1	0	0	1	0	1
1955	Hcv1.av93.c10.g228	c10	228	1	0	0	1	1	1
1956	Hcv1.av93.c10.g229	c10	229	1	0	0	1	0	1
1957	Hcv1.av93.c10.g230	c10	230	1	0	0	1	0	1
1958	Hcv1.av93.c10.g231	c10	231	1	0	0	1	0	1
1959	Hcv1.av93.c10.g232	c10	232	1	0	0	1	0	1
1960	Hcv1.av93.c10.g233	c10	233	0	1	0	1	0	0
1961	Hcv1.av93.c10.g234	c10	234	0	1	0	1	0	1
1962	Hcv1.av93.c10.g235	c10	235	1	0	0	1	0	1
1963	Hcv1.av93.c10.g236	c10	236	1	0	0	1	0	1
1964	Hcv1.av93.c10.g237	c10	237	1	0	0	1	0	0
1965	Hcv1.av93.c10.g238	c10	238	1	0	0	1	0	1
1966	Hcv1.av93.c10.g239	c10	239	1	0	0	1	0	1
1967	Hcv1.av93.c10.g240	c10	240	1	0	0	1	0	0
1968	Hcv1.av93.c10.g241	c10	241	1	0	0	1	1	0
1969	Hcv1.av93.c10.g242	c10	242	1	0	0	1	0	1
1970	Hcv1.av93.c10.g243	c10	243	1	0	0	1	0	0
1971	Hcv1.av93.c10.g244	c10	244	1	0	0	1	0	0
1972	Hcv1.av93.c10.g245	c10	245	1	0	0	1	0	0
1973	Hcv1.av93.c10.g246	c10	246	1	0	0	1	0	1
1974	Hcv1.av93.c10.g247	c10	247	1	0	0	1	0	1
1975	Hcv1.av93.c10.g248	c10	248	1	0	0	1	0	1
1976	Hcv1.av93.c10.g249	c10	249	1	0	0	1	0	1
1977	Hcv1.av93.c10.g250	c10	250	1	0	0	1	0	1
1978	Hcv1.av93.c10.g251	c10	251	0	1	0	1	1	0
1979	Hcv1.av93.c10.g252	c10	252	1	0	0	1	1	0
1980	Hcv1.av93.c10.g253	c10	253	1	0	0	1	0	0
1981	Hcv1.av93.c10.g254	c10	254	1	0	0	1	0	1
1982	Hcv1.av93.c10.g255	c10	255	1	0	0	1	0	1
1983	Hcv1.av93.c10.g256	c10	256	1	0	0	1	0	1
1984	Hcv1.av93.c10.g257	c10	257	1	0	0	1	0	0
1985	Hcv1.av93.c10.g258	c10	258	1	0	0	1	0	0
1986	Hcv1.av93.c10.g259	c10	259	1	0	0	1	0	1
1987	Hcv1.av93.c10.g260	c10	260	1	0	0	1	0	0
1988	Hcv1.av93.c10.g261	c10	261	1	0	0	1	0	1
1989	Hcv1.av93.c10.g262	c10	262	1	0	0	1	0	1
1990	Hcv1.av93.c10.g263	c10	263	0	1	0	0	0	0
1991	Hcv1.av93.c10.g264	c10	264	0	1	0	1	0	0
1992	Hcv1.av93.c10.g265	c10	265	1	0	0	1	0	1
1993	Hcv1.av93.c10.g266	c10	266	1	0	0	1	0	0
1994	Hcv1.av93.c10.g267	c10	267	0	1	0	1	0	0
1995	Hcv1.av93.c10.g268	c10	268	1	0	0	1	0	1
1996	Hcv1.av93.c10.g269	c10	269	1	0	0	1	0	1
1997	Hcv1.av93.c10.g270	c10	270	1	0	0	1	0	1
1998	Hcv1.av93.c10.g271	c10	271	1	0	0	1	0	1
[truncated: 12,575 more rows]
